# Supplementary material for: Gene expression variation across genetically identical individuals predicts reproductive traits
Source: eLife. 2025 Sep 2;14:RP106525. doi: 10.7554/eLife.106525 (PMC12404612; doi:10.7554/eLife.106525)
Supplement: Source data 1. [file elife-106525-data1.xlsx]

## Sheet: README
All data to generate figures from the paper is included in one of the following sheets:
PhenotypicData: RNA sample number and phenotypic data for each individual worm included in mRNA-seq. For environment, 20C indicates constant temperature at 20C while 25C_8hr indicates an 8 hour shift to 25C. OA indicates a day 3 adult parent ('older adult') whereas YA indicates a day 1 adult parent ('young adult'). RNA sample number corresponds to the fastq sequencing file for each worm, and repl…
BroodAssociationAnalysis: Association of each gene's expression with early brood. Pval_GeneExp indicates p-value of association, UpDown indicates the coefficient from the model, Significant is a binary variable with 1=significant and 0=not significant, AssocDirection indicates the direction of the association (positive or negative), averagecpm is the average counts per million across all worms fo…
ELOAssociationAnalysis: Association of each gene's expression with egg-laying onset. Column names are the same as for BroodAssociationAnalysis
BetaAnalysisBrood: Beta values 1-6 and significance for genes identified as significant from BroodAssociationAnalysis
BetaAnalysisELO: Beta values 1-6 and significance for genes identified as significant from ELOAssociationAnalysis
Beta1and2_all_Brood: Beta values 1 and 2 for all 8824 genes for the early brood trait
Beta1and2_all_ELO: Beta values 1 and 2 for all 8824 genes for the ELO trait
EnvEffectsOnGeneExp: Results of mixed binomial model to test effects of parental age and early-life temp on gene expression
GO_Terms: GO Terms for three groups of early brood-associated genes (sets of 448, 97, and 114 genes as defined the manuscript) as well as a split of the positively (159) and negatively (289) associated brood genes within the set of 448
PCA_GeneExpressionData: Principal component analysis on background set of 7938 genes for 180 worms. Data used to build models to determine if principal components predict both reproductive traits.
PCA_Loadings_ByGene: PCA loadings of each gene in each PC
BroodPredictiveGenes: 500 iterations of top 10 most predictive genes of early brood in training set ('Iteration' and 'Gene1' through 'Gene10'), proportion of variance explained in training set ('PropVarExplained_Train'), and proportion of variance explained in test set ('PropVarExplained_Test')
ELOPredictiveGenes: Same as BroodPredictiveGenes but for predicting egg-laying onset
BroodMLPrediction: Predicted early brood and true early brood for each worm based on machine learning model
BroodMLSelectedGenes: List of genes selected in at least one elastic net model and number of models (out of 180) the gene was selected in
ELOMLPrediction: Predicted egg-laying onset and true egg-laying onset for each worm based on machine learning model
ELOMLSelectedGenes: List of genes selected in at least one elastic net model and number of models (out of 180) the gene was selected in
VarianceZscore: Measure of each gene's variability across individuals after controlling for parental age, early-life temperature, biological replicate and average expression level. Higher z-score genes are more variable, while lower z-score genes are less variable
RNAi_data_allgenes: RNAi treatment and early brood measurements for each worm across 2 batches and 2 biological replicates within each batch
RNAi_pufdose: RNAi dose response for puf-5 and puf-7 RNAi
AhringerData_ChromatinTissue: Chromatin domain and tissue-specific expression information for genes generated from Ahringer lab datasets (see Materials and methods)
ReadMappingFiltering: Library samples corresponding to individual worms, number of total reads and reads both mapping to the genome and assigned to features
Raw fastq files and processed count data for mRNA-seq is available through NCBI GEO accession number GSE244875
R scripts generated for analysis are available at https://github.com/amykwebster/SingleWormRNAseq

## Sheet: PhenotypicData
replicate	environment	parental_age	RNA_sample_number	ELO_hrs	brood_size
2021-10-08	20C	OA	68	66	133
2021-10-08	20C	OA	69	66	128
2021-10-08	25C_8hr	OA	70	66	133
2021-10-08	25C_8hr	OA	71	66	141
2021-10-08	25C_8hr	OA	72	66	138
2021-10-08	20C	OA	73	66	141
2021-10-08	25C_8hr	YA	74	66	107
2021-10-08	20C	YA	75	67	100
2021-10-08	20C	OA	77	67	98
2021-10-08	20C	OA	78	67	125
2021-10-08	25C_8hr	OA	79	67	132
2021-10-08	25C_8hr	OA	81	67	123
2021-10-08	25C_8hr	OA	82	67	121
2021-10-08	20C	OA	84	67	123
2021-10-08	25C_8hr	OA	90	67	115
2021-10-08	25C_8hr	YA	91	67	123
2021-10-08	20C	OA	92	67	133
2021-10-08	20C	OA	93	67	144
2021-10-08	20C	YA	95	68	95
2021-10-08	20C	YA	96	68	111
2021-10-08	20C	OA	97	68	133
2021-10-08	25C_8hr	YA	98	68	106
2021-10-08	20C	YA	102	69	100
2021-10-08	20C	YA	103	69	94
2021-10-08	20C	OA	104	69	126
2021-10-08	20C	OA	105	69	126
2021-10-08	25C_8hr	OA	106	69	131
2021-10-08	25C_8hr	OA	107	69	122
2021-10-08	20C	YA	109	70	92
2021-10-08	25C_8hr	OA	110	70	112
2021-10-08	20C	YA	112	71	108
2021-10-08	20C	YA	114	72	105
2021-10-08	20C	YA	116	74	109
2021-10-08	25C_8hr	YA	117	74	47
2021-10-22	25C_8hr	OA	162	66	142
2021-10-22	20C	OA	163	66	128
2021-10-22	25C_8hr	YA	164	66	115
2021-10-22	25C_8hr	YA	165	66	124
2021-10-22	25C_8hr	YA	166	66	101
2021-10-22	20C	YA	167	66	112
2021-10-22	25C_8hr	OA	168	67	123
2021-10-22	25C_8hr	OA	169	67	127
2021-10-22	25C_8hr	OA	170	67	136
2021-10-22	25C_8hr	OA	171	67	131
2021-10-22	25C_8hr	OA	172	67	123
2021-10-22	25C_8hr	YA	173	67	113
2021-10-22	25C_8hr	YA	174	67	98
2021-10-22	25C_8hr	YA	175	67	100
2021-10-22	25C_8hr	YA	176	67	107
2021-10-22	25C_8hr	YA	177	67	99
2021-10-22	25C_8hr	OA	181	68	139
2021-10-22	25C_8hr	OA	182	68	135
2021-10-22	25C_8hr	OA	183	68	135
2021-10-22	25C_8hr	OA	184	68	134
2021-10-22	20C	OA	185	68	120
2021-10-22	20C	OA	186	68	120
2021-10-22	25C_8hr	YA	187	68	113
2021-10-22	25C_8hr	YA	188	68	108
2021-10-22	25C_8hr	OA	189	69	137
2021-10-22	20C	OA	190	69	131
2021-10-22	20C	OA	191	69	111
2021-10-22	20C	OA	192	69	105
2021-10-22	25C_8hr	YA	193	69	97
2021-10-22	25C_8hr	YA	194	69	111
2021-10-22	25C_8hr	YA	195	69	110
2021-10-22	20C	YA	196	69	89
2021-10-22	20C	YA	197	69	108
2021-10-22	20C	YA	198	69	111
2021-10-22	20C	YA	199	69	84
2021-10-22	20C	YA	200	69	101
2021-10-22	20C	OA	202	70	124
2021-10-22	20C	OA	203	70	147
2021-10-22	25C_8hr	YA	204	70	122
2021-10-22	25C_8hr	YA	205	70	90
2021-10-22	20C	YA	206	70	98
2021-10-22	20C	YA	207	70	103
2021-10-22	25C_8hr	OA	208	71	105
2021-10-22	20C	OA	209	71	142
2021-10-22	20C	OA	210	71	129
2021-10-22	20C	OA	211	71	134
2021-10-22	20C	OA	212	71	140
2021-10-22	20C	YA	213	71	108
2021-10-22	20C	YA	214	71	93
2021-10-22	20C	YA	215	71	116
2021-10-22	20C	YA	216	72	51
2021-10-22	20C	YA	217	72	59
2022-04-15	25C_8hr	YA	218	66	101
2022-04-15	25C_8hr	YA	219	66	91
2022-04-15	25C_8hr	OA	220	66	124
2022-04-15	25C_8hr	OA	221	66	137
2022-04-15	25C_8hr	YA	224	67	93
2022-04-15	25C_8hr	YA	225	67	88
2022-04-15	25C_8hr	YA	226	67	101
2022-04-15	25C_8hr	YA	227	67	97
2022-04-15	20C	YA	228	67	82
2022-04-15	20C	YA	229	67	84
2022-04-15	25C_8hr	OA	230	67	126
2022-04-15	25C_8hr	OA	231	67	121
2022-04-15	25C_8hr	OA	232	67	99
2022-04-15	25C_8hr	OA	233	67	140
2022-04-15	20C	OA	234	67	122
2022-04-15	25C_8hr	YA	235	68	105
2022-04-15	25C_8hr	YA	236	68	82
2022-04-15	25C_8hr	YA	237	68	103
2022-04-15	25C_8hr	YA	238	68	91
2022-04-15	25C_8hr	YA	239	68	87
2022-04-15	25C_8hr	YA	240	68	83
2022-04-15	20C	YA	241	68	80
2022-04-15	20C	YA	242	68	89
2022-04-15	20C	YA	243	68	96
2022-04-15	25C_8hr	OA	244	68	129
2022-04-15	20C	OA	245	68	88
2022-04-15	25C_8hr	YA	246	69	113
2022-04-15	25C_8hr	YA	247	69	119
2022-04-15	25C_8hr	YA	248	69	122
2022-04-15	25C_8hr	YA	249	69	94
2022-04-15	25C_8hr	YA	250	69	96
2022-04-15	25C_8hr	YA	252	69	117
2022-04-15	20C	YA	253	69	96
2022-04-15	20C	YA	254	69	94
2022-04-15	20C	YA	255	69	85
2022-04-15	20C	YA	256	69	95
2022-04-15	20C	YA	257	69	99
2022-04-15	20C	OA	258	69	115
2022-04-15	20C	OA	259	69	127
2022-04-15	20C	OA	260	69	96
2022-04-15	20C	OA	261	69	94
2022-04-15	25C_8hr	YA	262	70	77
2022-04-15	25C_8hr	YA	263	70	100
2022-04-15	20C	YA	264	70	98
2022-04-15	25C_8hr	OA	265	70	139
2022-04-15	20C	OA	266	70	133
2022-04-15	20C	OA	267	70	104
2022-04-15	20C	OA	268	70	110
2022-04-15	25C_8hr	YA	269	71	76
2022-04-15	25C_8hr	YA	270	71	121
2022-04-15	25C_8hr	YA	271	71	113
2022-04-15	20C	YA	272	71	103
2022-04-15	20C	YA	273	71	87
2022-04-15	20C	YA	274	71	88
2022-04-15	20C	YA	275	71	94
2022-04-15	20C	YA	276	71	83
2022-04-15	20C	OA	277	71	126
2022-04-15	20C	OA	278	71	136
2022-04-15	20C	OA	279	71	121
2022-04-15	20C	YA	281	72	79
2022-04-15	20C	YA	282	72	88
2022-04-15	20C	YA	283	72	113
2022-04-15	20C	YA	285	72	98
2022-04-15	20C	YA	286	72	108
2022-04-15	20C	OA	287	72	140
2022-04-15	20C	OA	288	72	122
2022-04-15	20C	YA	290	73	95
2022-04-15	20C	YA	291	73	86
2022-04-15	20C	YA	292	73	102
2022-04-15	25C_8hr	YA	293	74	106
2022-04-15	20C	YA	294	74	83
2022-04-29	25C_8hr	OA	305	68	137
2022-04-29	20C	OA	306	68	129
2022-04-29	20C	OA	307	68	141
2022-04-29	25C_8hr	YA	308	68	105
2022-04-29	25C_8hr	YA	328	70	114
2022-04-29	25C_8hr	YA	348	73	149
2022-05-09	25C_8hr	OA	352	67	122
2022-05-09	20C	YA	356	67	118
2022-05-09	25C_8hr	OA	364	68	142
2022-05-09	25C_8hr	OA	365	68	134
2022-05-09	25C_8hr	OA	366	68	142
2022-05-09	25C_8hr	OA	367	68	153
2022-05-09	25C_8hr	OA	368	68	129
2022-05-09	20C	YA	369	68	127
2022-05-09	20C	YA	370	68	81
2022-05-09	20C	YA	371	68	123
2022-05-09	25C_8hr	YA	372	68	94
2022-05-09	25C_8hr	YA	373	68	95
2022-05-09	20C	OA	398	72	127
2022-05-09	20C	OA	399	72	141
2022-05-09	20C	OA	400	72	129
2022-05-09	20C	OA	401	72	136
2022-05-09	25C_8hr	OA	402	72	160
2021-10-08	20C	OA	76	67	128
2021-10-08	20C	OA	80	67	138
2021-10-08	25C_8hr	YA	85	67	118
2021-10-08	25C_8hr	YA	86	67	129
2021-10-08	25C_8hr	YA	87	67	122
2021-10-08	20C	YA	94	68	97
2021-10-08	25C_8hr	YA	99	68	131
2021-10-08	20C	YA	101	69	47
2021-10-22	20C	YA	178	67	99
2021-10-22	20C	YA	179	67	114
2022-05-09	25C_8hr	OA	355	67	136
2022-05-09	25C_8hr	YA	359	67	137

## Sheet: BroodAssociationAnalysis
gene	symbol	sequence	PVal_GeneExp	UpDown	Significant	AssocDirection	averagecpm	CoeffCPMNorm
WBGene00000609	col-20	F11G11.11	5.92e-26	-0.0613874	1	negative	666.578	-40.9195
WBGene00000597	col-8	F11H8.3	2.5e-21	-0.0667494	1	negative	612.97	-40.9154
WBGene00003893	ost-1	C44B12.2	6.4e-21	-0.386242	1	negative	190.445	-73.5579
WBGene00000713	col-140	F26F12.1	3.16e-20	-0.0381505	1	negative	1380.44	-52.6644
WBGene00000752	col-179	C34F6.3	3.62e-19	-0.312022	1	negative	152.316	-47.5257
WBGene00022245	acp-6	Y73B6BL.24	9.36e-19	-0.14357	1	negative	283.949	-40.7665
WBGene00000673	col-98	F14F7.1	1.87e-18	-0.295786	1	negative	105.421	-31.1821
WBGene00013489	col-42	Y69H2.14	1.81e-17	-0.228271	1	negative	135.054	-30.8291
WBGene00003369	mlc-1	C36E6.3	3.27e-17	-0.379869	1	negative	181.86	-69.0828
WBGene00003371	mlc-3	F09F7.2	5.54e-17	-0.280495	1	negative	288.136	-80.8207
WBGene00000677	col-103	F56B3.1	1.01e-16	-0.317918	1	negative	93.3246	-29.6695
WBGene00004014	phb-1	Y37E3.9	1.59e-16	0.324641	1	positive	331.927	107.757
WBGene00000733	col-160	F57B1.4	2.49e-16	-0.0583365	1	negative	650.37	-37.9403
WBGene00008707		F11E6.3	1.33e-15	-0.183097	1	negative	277.729	-50.8514
WBGene00009559	mtx-1	F39B2.11	2.08e-15	0.841388	1	positive	136.987	115.259
WBGene00001483	fog-3	C03C11.2	3.24e-15	-5.74972	1	negative	1.27011	-7.30276
WBGene00011527	cchl-1	T06D8.6	4.44e-15	0.557537	1	positive	197.16	109.924
WBGene00000751	col-178	C34F6.2	6.66e-15	-0.0581	1	negative	883.416	-51.3265
WBGene00021248		Y22D7AL.10	7.87e-15	0.360921	1	positive	179.397	64.7479
WBGene00006789	unc-54	F11C3.3	1.39e-14	-0.0897756	1	negative	779.493	-69.9794
WBGene00019540		K08D12.6	2.68e-14	-0.249641	1	negative	127.778	-31.8986
WBGene00001000	dim-1	C18A11.7	3.08e-14	-0.475699	1	negative	117.863	-56.0674
WBGene00011059		R06C1.4	4.55e-14	-0.432606	1	negative	102.533	-44.3566
WBGene00001155	ech-6	T05G5.6	5.2e-14	-0.144824	1	negative	524.231	-75.9215
WBGene00010303	cri-3	F59A2.3	9.01e-14	0.365336	1	positive	225.447	82.3637
WBGene00010690		K08H2.3	9.78e-14	2.02019	1	positive	21.9142	44.271
WBGene00001863	him-4	F15G9.4	1.19e-13	-1.21488	1	negative	46.468	-56.453
WBGene00003495	mup-2	T22E5.5	1.28e-13	-0.487375	1	negative	108.332	-52.7982
WBGene00006764	unc-27	ZK721.2	1.35e-13	-0.153893	1	negative	403.23	-62.0544
WBGene00016918	test-1	C54E4.2	2.83e-13	-1.11059	1	negative	47.9247	-53.2247
WBGene00006587	tnt-2	F53A9.10	3.15e-13	-0.121601	1	negative	399.804	-48.6165
WBGene00006819	unc-87	F08B6.4	5.13e-13	-0.221402	1	negative	308.589	-68.3222
WBGene00022887		ZK1290.5	5.93e-13	-2.99904	1	negative	7.25597	-21.761
WBGene00017119	timm-17B.1	E04A4.5	6.31e-13	0.553205	1	positive	162.027	89.6339
WBGene00006787	unc-52	ZC101.2	6.36e-13	-0.72262	1	negative	74.5299	-53.8568
WBGene00000715	col-142	T15B7.4	6.74e-13	-0.922248	1	negative	14.6536	-13.5143
WBGene00006999	zyx-1	F42G4.3	8.12e-13	-0.73333	1	negative	90.3655	-66.2677
WBGene00018037	chtl-1	F35C8.7	9.47e-13	0.909418	1	positive	82.6657	75.1777
WBGene00008224	slrp-1	C50B8.1	1.03e-12	0.346162	1	positive	175.949	60.907
WBGene00000732	col-159	F57B1.3	1.1e-12	-1.0425	1	negative	19.3801	-20.2037
WBGene00017852		F27C1.2	1.1e-12	0.418282	1	positive	174.032	72.7947
WBGene00013878	atfs-1	ZC376.7	1.51e-12	0.391164	1	positive	161.681	63.2438
WBGene00001263	emb-9	K04H4.1	1.57e-12	-0.300299	1	negative	205.409	-61.6842
WBGene00011753		T13F3.6	1.61e-12	-0.260269	1	negative	140.237	-36.4994
WBGene00002010	hsp-6	C37H5.8	2.42e-12	0.0570044	1	positive	1019.31	58.1053
WBGene00016658		C45B2.1	2.43e-12	-1.73057	1	negative	12.7888	-22.1319
WBGene00020287	lsy-13	T06A10.4	2.49e-12	0.582084	1	positive	141.496	82.3625
WBGene00012123		T28D6.3	3.15e-12	-2.10401	1	negative	14.2794	-30.0441
WBGene00010353	memi-3	H02I12.5	3.73e-12	0.619174	1	positive	173.013	107.125
WBGene00000757	col-184	F15A2.1	6.3e-12	-0.0612452	1	negative	823.459	-50.4329
WBGene00007352	cdc-48.1	C06A1.1	6.31e-12	0.130928	1	positive	1000.91	131.047
WBGene00010055		F54D5.12	8.26e-12	-0.350111	1	negative	225.037	-78.7879
WBGene00007927		C34C12.8	9.53e-12	0.470249	1	positive	115.274	54.2073
WBGene00002068	ify-1	C27A2.3	1.17e-11	0.267701	1	positive	334.14	89.4494
WBGene00003370	mlc-2	C36E6.5	1.18e-11	-0.132808	1	negative	403.627	-53.6049
WBGene00009246	gfm-1	F29C12.4	1.19e-11	0.787525	1	positive	110.305	86.8676
WBGene00013724		Y106G6H.14	1.45e-11	1.456	1	positive	52.3932	76.2847
WBGene00000779	cpn-3	F28H1.2	2.07e-11	-0.231225	1	negative	232.059	-53.6578
WBGene00017065		D2092.4	2.38e-11	-2.25336	1	negative	20.1127	-45.3211
WBGene00020808	clik-1	T25F10.6	2.59e-11	-0.155658	1	negative	360.502	-56.115
WBGene00013481		Y69H2.3	2.87e-11	-0.313353	1	negative	139.629	-43.7531
WBGene00007463	vgln-1	C08H9.2	3.3e-11	-0.135216	1	negative	906.321	-122.549
WBGene00002978	lev-11	Y105E8B.1	3.57e-11	-0.11312	1	negative	553.439	-62.6051
WBGene00004243	puf-7	B0273.2	3.75e-11	0.518104	1	positive	205.111	106.269
WBGene00002255	lbp-3	F40F4.4	4.73e-11	-0.934936	1	negative	52.4322	-49.0208
WBGene00006780	unc-44	B0350.2	5.01e-11	-0.612495	1	negative	86.7721	-53.1474
WBGene00002268	lec-5	ZK1248.16	5.34e-11	-0.488996	1	negative	147.521	-72.1372
WBGene00021645		Y47G6A.19	5.49e-11	-2.90794	1	negative	8.59736	-25.0006
WBGene00000754	col-181	W03G11.1	6.16e-11	-0.0345605	1	negative	1331.5	-46.0172
WBGene00003929	pat-2	F54F2.1	6.74e-11	-1.59175	1	negative	24.823	-39.512
WBGene00020091	rnp-8	R119.7	6.94e-11	0.204095	1	positive	346.036	70.6241
WBGene00001631	gly-6	H38K22.5	7.54e-11	-2.14471	1	negative	16.5762	-35.5511
WBGene00006914	vha-5	F35H10.4	7.86e-11	-0.891799	1	negative	57.3258	-51.1231
WBGene00044324	ufm-1	ZK652.3	8.85e-11	0.489489	1	positive	117.556	57.5421
WBGene00045418		F15B9.10	9.14e-11	0.276133	1	positive	114.252	31.5488
WBGene00003922	pas-1	C15H11.7	1.04e-10	0.427874	1	positive	231.368	98.9964
WBGene00016321	tppp-1	C32E8.3	1.37e-10	-0.820129	1	negative	81.5939	-66.9175
WBGene00011986		T24D1.3	1.54e-10	0.296968	1	positive	275.084	81.6911
WBGene00017874	acdh-9	F28A10.6	1.57e-10	-0.804264	1	negative	80.1697	-64.4776
WBGene00000228	atn-1	W04D2.1	1.75e-10	-0.796028	1	negative	60.6022	-48.241
WBGene00003497	mup-4	K07D8.1	1.85e-10	-0.863286	1	negative	51.3621	-44.3401
WBGene00001856	hil-5	B0414.3	1.9e-10	0.153827	1	positive	508.277	78.1868
WBGene00010727		K09G1.1	1.9e-10	-0.991846	1	negative	46.0819	-45.7061
WBGene00006754	unc-15	F07A5.7	2.25e-10	-0.123454	1	negative	561.599	-69.3315
WBGene00015472		C05D9.3	2.26e-10	-2.84772	1	negative	8.60733	-24.5113
WBGene00019983	sti-1	R09E12.3	2.3e-10	0.414514	1	positive	208.255	86.3248
WBGene00001385	far-1	F02A9.2	2.38e-10	-0.0871717	1	negative	695.617	-60.6381
WBGene00006408	tag-18	T14G12.3	2.58e-10	-0.792546	1	negative	68.7807	-54.5119
WBGene00008393		D1086.6	3.31e-10	-0.975948	1	negative	48.4723	-47.3064
WBGene00006672	twk-18	C24A3.6	3.44e-10	-2.25496	1	negative	14.7557	-33.2734
WBGene00015780		C14F11.4	3.6e-10	-2.02749	1	negative	21.2844	-43.154
WBGene00008390		D1086.3	3.65e-10	-0.726247	1	negative	22.3709	-16.2468
WBGene00017548		F18A1.7	4.43e-10	0.209004	1	positive	483.504	101.054
WBGene00002264	lec-1	W09H1.6	6.11e-10	-0.225783	1	negative	382.299	-86.3168
WBGene00011642		T09B9.1	6.95e-10	1.03556	1	positive	54.6715	56.6154
WBGene00007686	tomm-40	C18E9.6	7e-10	0.40736	1	positive	182.202	74.2216
WBGene00000118	alh-12	Y69F12A.2	7.36e-10	-1.07306	1	negative	46.9452	-50.3751
WBGene00003828	nuc-1	C07B5.5	7.38e-10	-0.740529	1	negative	66.9544	-49.5817
WBGene00000066	act-4	M03F4.2	7.46e-10	-0.0593549	1	negative	979.954	-58.165
WBGene00021628		Y47D9A.1	7.75e-10	0.396589	1	positive	156.505	62.0681
WBGene00000998	dig-1	K07E12.1	8.28e-10	-1.32358	1	negative	34.6692	-45.8876
WBGene00002497	let-268	F52H3.1	9.1e-10	-2.35521	1	negative	10.5428	-24.8305
WBGene00010135		F55H12.4	1.09e-09	-1.04766	1	negative	32.2523	-33.7896
WBGene00000671	col-96	Y41C4A.19	1.1e-09	-2.85297	1	negative	7.33374	-20.923
WBGene00019727	zig-12	M02D8.1	1.12e-09	-0.936744	1	negative	51.795	-48.5187
WBGene00010304	clpf-1	F59A2.4	1.19e-09	0.905641	1	positive	65.935	59.7134
WBGene00011095	gana-1	R07B7.11	1.37e-09	-3.28258	1	negative	7.35814	-24.1537
WBGene00019947	htz-1	R08C7.3	1.42e-09	0.0750235	1	positive	866.595	65.0149
WBGene00016346	fbxa-120	C33E10.2	1.48e-09	2.90956	1	positive	6.42803	18.7027
WBGene00010701	ent-2	K09A9.3	1.51e-09	-0.622103	1	negative	83.6461	-52.0365
WBGene00008856		F15D3.6	2.06e-09	0.60771	1	positive	129.298	78.5758
WBGene00002280	let-2	F01G12.5	2.07e-09	-0.149226	1	negative	347.695	-51.8852
WBGene00012452		Y17D7B.4	2.11e-09	-3.63742	1	negative	7.25265	-26.3809
WBGene00017440	upb-1	F13H8.7	2.19e-09	-0.632996	1	negative	79.4457	-50.2888
WBGene00017986		F32D1.7	2.28e-09	0.341578	1	positive	272.154	92.962
WBGene00002265	lec-2	F52H3.7	2.48e-09	-0.391866	1	negative	201.303	-78.8838
WBGene00004502	rpt-2	F29G9.5	2.49e-09	0.295468	1	positive	399.05	117.906
WBGene00010012	saeg-1	F53H10.2	2.67e-09	-0.760411	1	negative	46.7682	-35.5631
WBGene00019203	ttr-47	H14N18.3	2.89e-09	-0.695344	1	negative	71.6401	-49.8145
WBGene00008218	nasp-2	C50B6.2	3.44e-09	0.0892515	1	positive	1269.9	113.341
WBGene00006584	tni-1	F42E11.4	3.45e-09	-2.21464	1	negative	9.66317	-21.4004
WBGene00003148	mbf-1	H21P03.1	3.55e-09	0.494516	1	positive	160.603	79.4207
WBGene00000378	cct-2	T21B10.7	3.61e-09	0.247794	1	positive	426.77	105.751
WBGene00005552	sri-40	Y27F2A.3	3.66e-09	-0.989275	1	negative	32.9734	-32.6197
WBGene00000680	col-106	Y77E11A.15	4.55e-09	-0.0597606	1	negative	741.134	-44.2906
WBGene00015145	arle-14	B0336.5	4.88e-09	0.890574	1	positive	80.702	71.8711
WBGene00004302	ran-1	K01G5.4	5.93e-09	0.10165	1	positive	1066.58	108.418
WBGene00007000	tufm-1	Y71H2AM.23	6.17e-09	0.266301	1	positive	298.178	79.4051
WBGene00004352	rgs-9	ZC53.7	6.72e-09	1.41721	1	positive	32.7587	46.4261
WBGene00000942	deb-1	ZC477.9	7.42e-09	-1.03662	1	negative	40.7856	-42.2793
WBGene00017265	snpc-1.3	F08F3.9	7.43e-09	-4.40972	1	negative	2.93609	-12.9473
WBGene00013532		Y73F8A.27	7.76e-09	1.02419	1	positive	60.6239	62.0907
WBGene00015591	cyk-7	C08C3.4	8.87e-09	0.625421	1	positive	145.449	90.9667
WBGene00000115	alh-9	F01F1.6	9.25e-09	-0.26167	1	negative	192.491	-50.3693
WBGene00022854	cin-4	ZK1127.7	1.12e-08	-0.774856	1	negative	54.5553	-42.2725
WBGene00194674		F23D12.11	1.14e-08	-0.338299	1	negative	74.816	-25.3102
WBGene00006759	unc-22	ZK617.1	1.15e-08	-0.576653	1	negative	68.2318	-39.3461
WBGene00015803		C15H9.9	1.17e-08	-0.686601	1	negative	75.5116	-51.8464
WBGene00016722		C46G7.2	1.22e-08	-1.15203	1	negative	42.8288	-49.3402
WBGene00003175	mec-12	C44B11.3	1.27e-08	-2.36805	1	negative	14.6487	-34.6888
WBGene00001428	fkb-3	C05C8.3	1.44e-08	-1.67261	1	negative	17.7852	-29.7476
WBGene00000140	anc-1	ZK973.6	1.47e-08	-0.651211	1	negative	91.5305	-59.6057
WBGene00000175	aqp-7	M02F4.8	1.47e-08	-0.551708	1	negative	98.3262	-54.2473
WBGene00010064		F54F7.2	1.52e-08	-1.26945	1	negative	20.9465	-26.5905
WBGene00004823	skr-17	C06A8.4	1.53e-08	0.97672	1	positive	73.3752	71.667
WBGene00007001	tufm-2	C43E11.4	1.61e-08	0.752464	1	positive	98.3668	74.0175
WBGene00019611		K10B3.5	1.63e-08	1.15589	1	positive	19.1449	22.1295
WBGene00016442		C35D10.5	1.66e-08	1.04062	1	positive	46.6593	48.5544
WBGene00001793	gsy-1	Y46G5A.31	1.67e-08	0.467817	1	positive	224.743	105.138
WBGene00007109	edg-1	B0035.6	1.7e-08	0.506335	1	positive	191.403	96.9142
WBGene00008219		C50B6.3	1.83e-08	0.476732	1	positive	159.163	75.878
WBGene00018718		F52H2.6	1.84e-08	-2.1218	1	negative	16.1624	-34.2934
WBGene00010593	gsnl-1	K06A4.3	1.9e-08	-1.86436	1	negative	19.2767	-35.9386
WBGene00002915	let-805	H19M22.2	1.91e-08	-1.03875	1	negative	35.0143	-36.3713
WBGene00015061	cpna-2	B0228.4	1.91e-08	-0.89553	1	negative	52.8136	-47.2961
WBGene00011830	cyp-29A2	T19B10.1	2.07e-08	-1.80726	1	negative	12.442	-22.486
WBGene00008410		D2023.6	2.08e-08	0.535268	1	positive	114.259	61.1592
WBGene00008435	glna-2	DH11.1	2.11e-08	-2.4898	1	negative	13.1436	-32.725
WBGene00003242	mig-6	C37C3.6	2.12e-08	-0.293977	1	negative	157.701	-46.3604
WBGene00010677	gtbp-1	K08F4.2	2.13e-08	0.204274	1	positive	534.3	109.144
WBGene00000207	asb-2	F02E8.1	2.37e-08	-0.253313	1	negative	257.384	-65.1988
WBGene00004241	puf-5	F54C9.8	2.38e-08	0.0799987	1	positive	1347.97	107.836
WBGene00006863	gyg-1	F56B6.4	2.53e-08	-1.57885	1	negative	25.868	-40.8417
WBGene00007168		B0393.3	2.57e-08	0.296987	1	positive	307.885	91.438
WBGene00007718	otub-1	C25D7.8	2.58e-08	0.383875	1	positive	145.192	55.7358
WBGene00003995	pgp-1	K08E7.9	2.76e-08	-0.937757	1	negative	14.9397	-14.0098
WBGene00003772	nlr-1	F20B10.1	2.94e-08	-3.28847	1	negative	3.93866	-12.9522
WBGene00003994	pgl-3	C18G1.4	2.97e-08	0.265355	1	positive	262.451	69.6427
WBGene00001794	gta-1	K04D7.3	3.05e-08	-0.286508	1	negative	207.656	-59.495
WBGene00007709	clec-87	C25A1.8	3.17e-08	0.0582899	1	positive	1769.63	103.152
WBGene00019006	spg-20	F57B10.9	3.22e-08	-1.23518	1	negative	29.1043	-35.9491
WBGene00019895	aagr-2	R05F9.12	3.22e-08	-0.323896	1	negative	222.413	-72.0386
WBGene00006794	unc-60	C38C3.5	3.26e-08	-1.16973	1	negative	39.0726	-45.7045
WBGene00019477	cest-17	K07C11.4	3.46e-08	-2.38918	1	negative	6.69021	-15.9841
WBGene00006603	tps-2	F19H8.1	3.53e-08	-1.56844	1	negative	25.5721	-40.1084
WBGene00007964	cyp-25A2	C36A4.2	3.78e-08	-1.17098	1	negative	20.1519	-23.5974
WBGene00022508		ZC53.1	3.94e-08	1.49201	1	positive	32.1603	47.9835
WBGene00001386	far-2	F02A9.3	4.04e-08	-0.0171984	1	negative	3368.02	-57.9245
WBGene00021709	ugt-29	Y49C4A.8	4.05e-08	-2.69603	1	negative	12.1773	-32.8303
WBGene00010094	tsfm-1	F55C5.5	4.09e-08	0.538573	1	positive	81.4575	43.8708
WBGene00002023	hsp-25	C09B8.6	4.31e-08	-0.556448	1	negative	85.0145	-47.3061
WBGene00000473	cey-2	F46F11.2	4.37e-08	0.0359882	1	positive	2371.69	85.3528
WBGene00016018		C23H3.2	4.57e-08	-1.49022	1	negative	30.5531	-45.531
WBGene00013297		Y57G11B.5	4.58e-08	-0.163577	1	negative	227.692	-37.2452
WBGene00007428	wdr-20	C08B6.7	4.89e-08	0.391257	1	positive	237.631	92.9748
WBGene00013531		Y73F8A.26	4.92e-08	-2.5787	1	negative	9.87233	-25.4577
WBGene00019647		K11D12.7	4.96e-08	-1.59052	1	negative	23.7676	-37.8028
WBGene00003589	nex-2	T07C4.9	5.36e-08	-1.39814	1	negative	25.9107	-36.2269
WBGene00003936	pat-12	T17H7.4	5.79e-08	-0.704282	1	negative	67.819	-47.7637
WBGene00010609	dut-1	K07A1.2	5.79e-08	0.143794	1	positive	511.669	73.5749
WBGene00012251	clec-49	W04E12.6	5.96e-08	-1.88476	1	negative	10.7185	-20.2018
WBGene00008666		F10G8.8	6.24e-08	-2.68612	1	negative	7.95859	-21.3777
WBGene00012428		Y11D7A.3	6.35e-08	-0.941059	1	negative	37.5958	-35.3799
WBGene00002129	inx-7	K02B2.4	6.47e-08	-1.17691	1	negative	39.7077	-46.7323
WBGene00001911	his-37	C50F4.7	6.82e-08	-0.905143	1	negative	37.5609	-33.998
WBGene00002256	lbp-4	ZK742.5	7.28e-08	0.724244	1	positive	63.1508	45.7366
WBGene00000620	col-43	ZC513.8	7.5e-08	-1.1848	1	negative	10.6506	-12.6188
WBGene00004078	pos-1	F52E1.1	7.71e-08	0.065505	1	positive	1283.46	84.073
WBGene00020530		T15B12.1	7.74e-08	-1.9741	1	negative	13.5311	-26.7118
WBGene00185067		Y54G11A.17	7.76e-08	0.927679	1	positive	49.5864	46.0002
WBGene00017012	acs-22	D1009.1	8.3e-08	-0.817733	1	negative	48.4122	-39.5883
WBGene00009138		F25H9.6	8.38e-08	1.07892	1	positive	53.5421	57.7674
WBGene00003216	memi-1	Y17G9B.9	8.41e-08	0.717077	1	positive	103.772	74.4124
WBGene00009531		F38B2.4	8.61e-08	-1.33193	1	negative	26.7596	-35.6419
WBGene00008654	pfas-1	F10F2.2	8.93e-08	-1.17389	1	negative	26.7878	-31.4459
WBGene00017968	skpo-3	F32A5.2	9.11e-08	-2.06578	1	negative	16.6601	-34.4161
WBGene00003185	mek-1	K08A8.1	9.21e-08	0.517358	1	positive	144.874	74.9517
WBGene00001481	fog-1	Y54E10A.4	9.35e-08	-0.806752	1	negative	43.9973	-35.4949
WBGene00018522		F46H5.7	9.6e-08	-0.794078	1	negative	83.0256	-65.9288
WBGene00006733	ufd-1	F19B6.2	9.62e-08	0.613118	1	positive	157.652	96.6592
WBGene00003674	nhr-84	T06C12.7	1.03e-07	-3.18831	1	negative	7.48021	-23.8492
WBGene00001692	grd-3	W05E7.1	1.04e-07	-0.678823	1	negative	41.3218	-28.0502
WBGene00009342	fasn-1	F32H2.5	1.09e-07	-0.316653	1	negative	109.588	-34.7014
WBGene00018373		F43B10.1	1.09e-07	-2.84414	1	negative	7.87532	-22.3985
WBGene00004130	ketn-1	F54E2.3	1.18e-07	-0.468763	1	negative	83.2369	-39.0184
WBGene00007193		B0491.6	1.19e-07	-1.22615	1	negative	52.4478	-64.3088
WBGene00001633	gly-8	Y66A7A.6	1.24e-07	-1.39117	1	negative	16.8987	-23.5089
WBGene00015802	kynu-1	C15H9.7	1.26e-07	-0.589208	1	negative	67.1771	-39.5813
WBGene00016390	ttc-1	C34B2.5	1.27e-07	0.784865	1	positive	63.3811	49.7456
WBGene00003738	nid-1	F54F3.1	1.29e-07	-0.809759	1	negative	41.8571	-33.8942
WBGene00017659		F21C10.10	1.35e-07	-0.77716	1	negative	39.5828	-30.7622
WBGene00010496	sec-12	K02B12.3	1.38e-07	0.847765	1	positive	77.7958	65.9526
WBGene00019332		K02F3.9	1.41e-07	-1.56648	1	negative	22.1756	-34.7376
WBGene00003692	nhr-102	T06C12.6	1.42e-07	-5.13601	1	negative	3.6888	-18.9457
WBGene00000214	asp-1	Y39B6A.20	1.43e-07	-0.0365937	1	negative	1312.63	-48.0338
WBGene00003407	mrp-1	F57C12.5	1.54e-07	-1.43144	1	negative	27.0035	-38.6538
WBGene00016485	meg-4	C36C9.1	1.6e-07	1.01194	1	positive	60.0813	60.7985
WBGene00017904	lim-8	F28F5.3	1.66e-07	-3.03232	1	negative	8.08134	-24.5052
WBGene00018217		F40A3.2	1.69e-07	-1.78109	1	negative	19.6563	-35.0096
WBGene00018532		F47B7.1	1.69e-07	-1.22033	1	negative	30.7569	-37.5336
WBGene00003482	mua-3	K08E5.3	1.76e-07	-1.50752	1	negative	18.5456	-27.9579
WBGene00016395	spcs-1	C34B2.10	1.81e-07	0.50232	1	positive	89.8572	45.1371
WBGene00008191		C49A1.10	1.83e-07	-3.30343	1	negative	6.48366	-21.4183
WBGene00006367	sym-2	ZK1067.6	1.88e-07	-3.14274	1	negative	4.80264	-15.0935
WBGene00019304		K02D10.4	1.89e-07	-2.61477	1	negative	6.81394	-17.8169
WBGene00007922	pph-6	C34C12.3	2.07e-07	0.577973	1	positive	107.818	62.3162
WBGene00011832	bgal-1	T19B10.3	2.1e-07	-1.62521	1	negative	22.4528	-36.4905
WBGene00019882		R05D3.9	2.11e-07	-1.58354	1	negative	20.1778	-31.9524
WBGene00006634	tsp-8	F33C8.3	2.12e-07	-3.09052	1	negative	7.84439	-24.2432
WBGene00009878		F49C12.9	2.13e-07	0.532528	1	positive	158.538	84.4261
WBGene00003992	pgl-1	ZK381.4	2.19e-07	0.17975	1	positive	397.03	71.3662
WBGene00019893	sgt-1	R05F9.10	2.28e-07	0.216973	1	positive	330.244	71.6538
WBGene00007574		C14B1.3	2.35e-07	-1.91442	1	negative	18.0722	-34.5976
WBGene00004086	pph-4.2	Y49E10.3	2.41e-07	0.548217	1	positive	133.023	72.9257
WBGene00001694	grd-5	F41E6.2	2.43e-07	-0.789472	1	negative	38.5077	-30.4007
WBGene00002263	lea-1	K08H10.1	2.47e-07	-0.0204158	1	negative	836.532	-17.0785
WBGene00000381	cct-6	F01F1.8	2.49e-07	0.234815	1	positive	394.711	92.6839
WBGene00017344		F10E7.2	2.49e-07	-1.56336	1	negative	22.8569	-35.7335
WBGene00019682		K12H4.7	2.5e-07	-0.175256	1	negative	272.882	-47.8244
WBGene00016178	mesp-1	C28C12.2	2.64e-07	0.241946	1	positive	294.849	71.3374
WBGene00013529		Y73F8A.24	2.8e-07	1.32918	1	positive	45.9251	61.0429
WBGene00018340	anmt-2	F42A10.3	2.95e-07	-1.56744	1	negative	18.9775	-29.7462
WBGene00004201	prx-19	F54F2.8	2.96e-07	0.421326	1	positive	139.028	58.5761
WBGene00012382	ttr-16	Y5F2A.1	2.98e-07	-0.210401	1	negative	200.903	-42.2702
WBGene00012113		T28B8.1	3.25e-07	-0.912466	1	negative	25.8601	-23.5965
WBGene00008147		C47E12.2	3.32e-07	0.447373	1	positive	106.195	47.5086
WBGene00009645		F42G10.1	3.34e-07	-1.85834	1	negative	13.6785	-25.4192
WBGene00012226		W03G11.4	3.45e-07	-1.9568	1	negative	6.66519	-13.0425
WBGene00018060	arrd-18	F35F10.11	3.64e-07	-2.60092	1	negative	7.52474	-19.5712
WBGene00022599	daf-41	ZC395.10	3.65e-07	0.124313	1	positive	532.313	66.1735
WBGene00013859		ZC247.1	3.76e-07	-1.45606	1	negative	24.3981	-35.525
WBGene00000716	col-143	T15B7.3	3.77e-07	-0.0312587	1	negative	1153.55	-36.0586
WBGene00012795		Y43E12A.3	3.77e-07	1.37889	1	positive	32.8083	45.239
WBGene00018051	che-10	F35D11.11	3.81e-07	-1.58753	1	negative	15.8588	-25.1763
WBGene00007780		C27D8.4	3.9e-07	0.941459	1	positive	52.2404	49.1822
WBGene00006815	unc-83	W01A11.3	4.01e-07	-1.31272	1	negative	23.9806	-31.4797
WBGene00015954		C18B2.3	4.22e-07	-3.09724	1	negative	7.3929	-22.8976
WBGene00000149	apl-1	C42D8.8	4.23e-07	-0.335085	1	negative	126.836	-42.5008
WBGene00004949	sox-2	K08A8.2	4.33e-07	-2.05084	1	negative	5.50387	-11.2875
WBGene00017362		F10G2.1	4.42e-07	-1.11741	1	negative	41.8834	-46.8008
WBGene00022072	cpg-9	Y67D8C.8	4.45e-07	-1.13922	1	negative	23.0967	-26.3121
WBGene00017770		F25B4.7	4.48e-07	0.755273	1	positive	80.6846	60.9389
WBGene00006061	stl-1	F30A10.5	4.7e-07	0.646701	1	positive	102.784	66.4705
WBGene00000086	aex-3	C02H7.3	4.88e-07	-4.14999	1	negative	3.3829	-14.039
WBGene00005712	srv-1	R13F6.3	4.9e-07	-2.61242	1	negative	10.1785	-26.5905
WBGene00006836	unc-112	C47E8.7	4.92e-07	-0.845105	1	negative	52.0415	-43.9806
WBGene00000224	atgp-1	F26D10.9	5.08e-07	-1.44073	1	negative	16.6821	-24.0343
WBGene00009192	asah-2	F27E5.1	5.14e-07	-1.78743	1	negative	13.0377	-23.3039
WBGene00003485	mua-6	W10G6.3	5.34e-07	-0.722379	1	negative	48.867	-35.3005
WBGene00012544		Y37D8A.2	5.41e-07	-0.26563	1	negative	270.629	-71.8872
WBGene00009092	tomm-20	F23H12.2	5.61e-07	0.560819	1	positive	95.9979	53.8374
WBGene00015449	ugt-63	C04F5.7	5.69e-07	-0.58121	1	negative	34.7198	-20.1795
WBGene00022178	cest-25	Y71H2AM.13	5.69e-07	-0.744141	1	negative	67.2439	-50.039
WBGene00010814		M01F1.8	5.88e-07	1.11042	1	positive	50.2976	55.8515
WBGene00000070	acy-3	C44F1.5	5.93e-07	-4.57916	1	negative	3.686	-16.8788
WBGene00017733	ubxn-1	F23C8.4	6.05e-07	0.393748	1	positive	184.996	72.8419
WBGene00015357		C02F12.8	6.18e-07	1.31327	1	positive	35.2391	46.2783
WBGene00020836	lgc-34	T27A1.4	6.24e-07	-2.64538	1	negative	6.84978	-18.1203
WBGene00019811	egg-2	R01H2.3	6.32e-07	0.239822	1	positive	310.523	74.4704
WBGene00001983	hoe-1	E04A4.4	6.37e-07	0.330005	1	positive	164.529	54.2956
WBGene00022117		Y71F9AL.12	6.55e-07	0.977705	1	positive	70.5824	69.0088
WBGene00011885		T21B10.3	6.76e-07	0.342006	1	positive	286.042	97.828
WBGene00020215		T04G9.4	6.96e-07	-2.9475	1	negative	7.21265	-21.2593
WBGene00019663		K11H12.7	7.18e-07	-1.83952	1	negative	15.1341	-27.8394
WBGene00007277	asfl-1	C03D6.5	7.19e-07	0.812492	1	positive	80.321	65.2602
WBGene00016943	acdh-1	C55B7.4	7.23e-07	-0.0507175	1	negative	1164.02	-59.0359
WBGene00020369	exc-15	T08H10.1	7.23e-07	-0.519342	1	negative	83.2963	-43.2592
WBGene00006820	unc-89	C09D1.1	7.3e-07	-0.761606	1	negative	60.8749	-46.3628
WBGene00001132	alp-1	T11B7.4	7.34e-07	-1.58068	1	negative	23.4152	-37.012
WBGene00003184	mei-2	F57B10.12	7.44e-07	0.352304	1	positive	250.443	88.232
WBGene00001161	efl-1	Y102A5C.18	7.55e-07	0.668467	1	positive	110.223	73.6806
WBGene00014207		ZK1058.9	7.56e-07	-0.818485	1	negative	48.5833	-39.7648
WBGene00003071	lrp-1	F29D11.1	7.68e-07	-1.11632	1	negative	33.4958	-37.3919
WBGene00011464		T05B9.1	7.75e-07	0.243917	1	positive	312.383	76.1956
WBGene00006529	tba-2	C47B2.3	7.79e-07	0.0607923	1	positive	1645.67	100.044
WBGene00003934	pat-10	F54C1.7	7.84e-07	-0.061478	1	negative	520.162	-31.9785
WBGene00009259	hpo-34	F29G6.3	7.84e-07	-0.291421	1	negative	239.971	-69.9325
WBGene00001703	grd-14	T01B10.2	7.88e-07	-3.94781	1	negative	3.59684	-14.1996
WBGene00010363		H04D03.2	8.13e-07	0.936885	1	positive	61.2231	57.359
WBGene00004059	pmp-2	C44B7.9	8.14e-07	-1.2695	1	negative	24.2421	-30.7754
WBGene00007175		B0395.3	8.16e-07	-0.934123	1	negative	46.4142	-43.3566
WBGene00011436		T04F3.1	8.22e-07	-1.28845	1	negative	32.1379	-41.4081
WBGene00000723	col-150	B0024.2	8.29e-07	-3.7319	1	negative	3.31759	-12.3809
WBGene00012812		Y43F8B.1	8.38e-07	-0.68622	1	negative	57.863	-39.7067
WBGene00000273	brp-1	Y79H2A.1	8.73e-07	-0.122666	1	negative	375.707	-46.0864
WBGene00022131		Y71F9B.13	8.8e-07	-2.21143	1	negative	15.0017	-33.1753
WBGene00013029	glrx-5	Y49E10.2	9.05e-07	1.11593	1	positive	36.5745	40.8145
WBGene00013882	msa-1	ZC410.5	9.46e-07	-0.908283	1	negative	27.9897	-25.4226
WBGene00007941		C34F6.7	9.49e-07	1.73832	1	positive	17.0258	29.5962
WBGene00018656	txdc-12.2	F49H12.5	9.74e-07	-1.21764	1	negative	20.3456	-24.7737
WBGene00002254	lbp-2	F40F4.2	9.99e-07	-0.138873	1	negative	323.447	-44.918
WBGene00044329	cpsf-4	F11A10.8	1e-06	0.570322	1	positive	129.643	73.9383
WBGene00007331	pho-11	C05C10.4	1.01e-06	-0.262596	1	negative	80.4527	-21.1266
WBGene00020581		T19D12.6	1.02e-06	-0.829506	1	negative	48.7319	-40.4234
WBGene00007290		C04B4.2	1.03e-06	0.627498	1	positive	107.67	67.5626
WBGene00013514		Y73F4A.1	1.04e-06	-1.91923	1	negative	14.8866	-28.5708
WBGene00014262		ZK1321.4	1.05e-06	-0.923731	1	negative	36.0103	-33.2638
WBGene00001394	fat-2	W02A2.1	1.07e-06	0.059303	1	positive	642.462	38.1
WBGene00003243	mig-10	F10E9.6	1.12e-06	-1.38402	1	negative	17.0381	-23.581
WBGene00044481		ZK185.5	1.16e-06	-2.43526	1	negative	9.50331	-23.143
WBGene00011995	rsf-1	T24F1.3	1.19e-06	-2.5953	1	negative	9.48838	-24.6252
WBGene00004995	spp-10	C28C12.7	1.21e-06	-0.225849	1	negative	248.873	-56.2077
WBGene00003130	map-2	Y116A8A.9	1.22e-06	0.434195	1	positive	213.805	92.8328
WBGene00006723	ubh-3	Y40G12A.1	1.22e-06	0.919199	1	positive	62.1452	57.1239
WBGene00012875		Y45F10B.13	1.32e-06	-1.43505	1	negative	20.2563	-29.0688
WBGene00001855	hil-4	C18G1.5	1.33e-06	0.109103	1	positive	649.096	70.8183
WBGene00001251	elt-3	K02B9.4	1.44e-06	-1.46351	1	negative	17.7186	-25.9313
WBGene00000866	cyb-2.1	Y43E12A.1	1.45e-06	0.370243	1	positive	195.263	72.2946
WBGene00043068		F32E10.9	1.46e-06	-2.32773	1	negative	11.4131	-26.5666
WBGene00003567	ncx-2	C10G8.5	1.47e-06	-1.50217	1	negative	24.2182	-36.3798
WBGene00003947	pbs-1	K08D12.1	1.47e-06	0.257171	1	positive	313.88	80.721
WBGene00017780		F25E2.2	1.48e-06	-0.415349	1	negative	126.543	-52.5597
WBGene00014076		ZK792.1	1.5e-06	-1.51117	1	negative	21.2845	-32.1643
WBGene00006407	lim-9	F25H5.1	1.54e-06	-0.886119	1	negative	38.4503	-34.0715
WBGene00003687	nhr-97	H27C11.1	1.55e-06	-0.731541	1	negative	53.653	-39.2494
WBGene00004143	pqn-59	R119.4	1.56e-06	0.0869761	1	positive	1002.49	87.1927
WBGene00019813	ger-1	R01H2.5	1.57e-06	-2.02511	1	negative	12.4721	-25.2574
WBGene00022250		Y73B6BL.29	1.58e-06	1.41245	1	positive	23.4556	33.1298
WBGene00019875	mca-2	R05C11.3	1.62e-06	-1.52229	1	negative	25.7561	-39.2082
WBGene00009542	copb-2	F38E11.5	1.64e-06	0.310734	1	positive	222.025	68.9905
WBGene00011897	scpl-4	T21C9.12	1.69e-06	0.430455	1	positive	116.807	50.2803
WBGene00001088	dpy-30	ZK863.6	1.72e-06	0.451789	1	positive	158.887	71.7833
WBGene00013693		Y105E8B.9	1.72e-06	-2.86171	1	negative	4.14136	-11.8514
WBGene00020284	mel-46	T06A10.1	1.72e-06	0.751845	1	positive	58.1888	43.749
WBGene00008857	timm-23	F15D3.7	1.74e-06	0.491811	1	positive	83.7147	41.1718
WBGene00013894		ZC434.8	1.75e-06	0.0754922	1	positive	393.004	29.6687
WBGene00011006	ugt-47	R04B5.9	1.76e-06	-1.09656	1	negative	29.9003	-32.7874
WBGene00021835		Y54E10A.17	1.82e-06	-1.60297	1	negative	17.4142	-27.9143
WBGene00012802	set-25	Y43F4B.3	1.83e-06	0.622019	1	positive	60.5304	37.651
WBGene00000822	csq-1	F40E10.3	1.85e-06	-0.279478	1	negative	147.581	-41.2457
WBGene00001027	dnj-9	F11G11.7	1.86e-06	0.660093	1	positive	89.317	58.9575
WBGene00011679	ucr-2.2	T10B10.2	1.87e-06	-0.762819	1	negative	55.2275	-42.1286
WBGene00000768	cor-1	R01H10.3	1.9e-06	-2.66832	1	negative	8.59415	-22.9319
WBGene00011662		T09F3.2	1.94e-06	0.273932	1	positive	174.604	47.8296
WBGene00000528	clh-1	T27D12.2	2.04e-06	-0.882098	1	negative	42.2723	-37.2883
WBGene00004094	ppw-2	Y110A7A.18	2.06e-06	0.382598	1	positive	132.605	50.7344
WBGene00044019		C55A6.12	2.09e-06	-1.92717	1	negative	14.675	-28.2813
WBGene00000133	amt-1	C05E11.4	2.1e-06	-1.35211	1	negative	11.633	-15.7291
WBGene00017698		F22B7.9	2.1e-06	-2.99221	1	negative	4.53627	-13.5735
WBGene00004438	rpl-25.1	F55D10.2	2.13e-06	-0.299149	1	negative	145.21	-43.4394
WBGene00011182		R09H10.5	2.15e-06	-0.636816	1	negative	61.3817	-39.0888
WBGene00009701	egg-3	F44F4.2	2.2e-06	0.317034	1	positive	236.419	74.953
WBGene00009982		F53F1.4	2.23e-06	-0.84844	1	negative	17.0053	-14.428
WBGene00020088		R119.2	2.24e-06	1.60124	1	positive	26.9566	43.1642
WBGene00000967	dhs-3	T02E1.5	2.25e-06	-0.617684	1	negative	57.5202	-35.5293
WBGene00000240	pah-1	K08F8.4	2.26e-06	-0.562257	1	negative	78.157	-43.9443
WBGene00014001	pyk-2	ZK593.1	2.26e-06	-1.17954	1	negative	36.5679	-43.1335
WBGene00015899		C17E7.4	2.28e-06	0.613724	1	positive	95.8956	58.8534
WBGene00002247	lam-1	W03F8.5	2.34e-06	-0.30457	1	negative	67.6291	-20.5978
WBGene00000083	adt-2	F08C6.1	2.38e-06	-1.49916	1	negative	20.149	-30.2066
WBGene00007934		C34E7.4	2.38e-06	-0.867337	1	negative	13.2729	-11.5121
WBGene00000183	arf-3	F57H12.1	2.52e-06	0.173004	1	positive	472.113	81.6777
WBGene00001977	hmg-12	Y17G7A.1	2.53e-06	0.133505	1	positive	488.126	65.1671
WBGene00019799		M151.7	2.55e-06	1.0088	1	positive	41.7941	42.1617
WBGene00000388	cdc-25.3	ZK637.11	2.57e-06	0.593966	1	positive	83.1492	49.3878
WBGene00001169	eef-1A.2	R03G5.1	2.59e-06	-0.10122	1	negative	344.391	-34.8592
WBGene00019963		R08E5.3	2.6e-06	0.956006	1	positive	16.4192	15.6968
WBGene00004038	plc-3	T01E8.3	2.62e-06	-2.41913	1	negative	11.9362	-28.8751
WBGene00019237		H24G06.1	2.68e-06	-1.56232	1	negative	16.5809	-25.9047
WBGene00020320		T07F8.4	2.68e-06	0.984574	1	positive	45.7696	45.0636
WBGene00013380	memi-2	Y62E10A.14	2.69e-06	0.492884	1	positive	121.037	59.657
WBGene00008580	dsb-1	F08G5.1	2.73e-06	0.792535	1	positive	82.6562	65.508
WBGene00001478	fmo-3	Y39A1A.19	2.78e-06	-2.09149	1	negative	8.68661	-18.168
WBGene00010260	ddx-17	F58E10.3	2.8e-06	0.11702	1	positive	743.059	86.9528
WBGene00018465		F45E1.4	2.82e-06	-2.22951	1	negative	7.3744	-16.4413
WBGene00020917		W01B11.6	2.86e-06	-1.1662	1	negative	20.0206	-23.348
WBGene00002061	ife-3	B0348.6	2.93e-06	0.18655	1	positive	374.242	69.8149
WBGene00011526	cox-15	T06D8.5	2.95e-06	0.617133	1	positive	70.8284	43.7106
WBGene00011664		T09F3.5	2.99e-06	1.19487	1	positive	52.9801	63.3046
WBGene00011124	sdz-27	R07H5.4	3e-06	-0.572628	1	negative	53.6614	-30.728
WBGene00003235	mif-2	C52E4.2	3.02e-06	-1.20872	1	negative	23.4606	-28.3573
WBGene00018519		F46H5.3	3.03e-06	-0.047774	1	negative	928.701	-44.3678
WBGene00000002	aat-1	F27C8.1	3.05e-06	-3.47393	1	negative	3.21369	-11.1641
WBGene00015044	cyp-34A9	B0213.15	3.1e-06	-2.39225	1	negative	3.4746	-8.31214
WBGene00003515	myo-3	K12F2.1	3.13e-06	-0.689782	1	negative	38.9891	-26.894
WBGene00019125	ddl-1	F59E12.10	3.13e-06	1.2441	1	positive	34.8683	43.3797
WBGene00016210		C29F5.1	3.14e-06	-1.5452	1	negative	23.3249	-36.0416
WBGene00001909	his-35	C50F4.13	3.2e-06	-0.829622	1	negative	38.0217	-31.5437
WBGene00011061	wago-1	R06C7.1	3.27e-06	0.0790511	1	positive	850.988	67.2715
WBGene00001955	hlh-11	F58A4.7	3.3e-06	-0.813351	1	negative	45.5131	-37.0181
WBGene00002050	ifa-1	F38B2.1	3.38e-06	-1.31392	1	negative	27.598	-36.2615
WBGene00020089		R119.3	3.43e-06	0.999194	1	positive	38.1377	38.107
WBGene00018146		F37C4.6	3.44e-06	-1.86258	1	negative	16.678	-31.0641
WBGene00018349		F42C5.9	3.45e-06	-1.42983	1	negative	25.2672	-36.1279
WBGene00013349		Y59A8B.12	3.46e-06	0.764984	1	positive	55.6824	42.5962
WBGene00004423	rpl-11.2	F07D10.1	3.47e-06	-0.191416	1	negative	195.637	-37.4481
WBGene00020035	egg-5	R12E2.10	3.47e-06	0.409132	1	positive	140.409	57.4459
WBGene00016564	cmt-1	C41D11.5	3.52e-06	0.549831	1	positive	111.899	61.5257
WBGene00007591	zipt-13	C14H10.1	3.57e-06	-1.45915	1	negative	19.0759	-27.8346
WBGene00001193	egl-26	C23H3.1	3.59e-06	1.37264	1	positive	25.8985	35.5493
WBGene00006876	vab-10	ZK1151.1	3.65e-06	-0.219047	1	negative	153.229	-33.5644
WBGene00006365	syg-1	K02E10.8	3.68e-06	-5.28087	1	negative	2.38609	-12.6006
WBGene00015102	cpg-2	B0280.5	3.7e-06	0.0304221	1	positive	3070.47	93.4101
WBGene00011320		T01C3.3	3.72e-06	0.252801	1	positive	208.709	52.762
WBGene00020479		T13C2.3	3.88e-06	-5.23057	1	negative	1.55142	-8.11482
WBGene00014965		Y106G6D.5	3.9e-06	0.830597	1	positive	42.2289	35.0752
WBGene00002219	klp-7	K11D9.1	4.05e-06	0.410195	1	positive	189.9	77.8962
WBGene00018446	ceh-83	F45C12.15	4.19e-06	1.20287	1	positive	37.0869	44.6109
WBGene00015141	ugt-46	B0310.5	4.23e-06	-0.985472	1	negative	33.091	-32.6103
WBGene00000266	bre-1	C53B4.7	4.29e-06	-2.41823	1	negative	11.1333	-26.9229
WBGene00002267	lec-4	C44F1.3	4.33e-06	-0.719508	1	negative	45.2402	-32.5507
WBGene00020732		T23E7.2	4.51e-06	-0.337508	1	negative	93.4029	-31.5242
WBGene00011629		T08G11.1	4.55e-06	-0.214783	1	negative	273.461	-58.7348
WBGene00021956		Y57E12AL.1	4.6e-06	0.246031	1	positive	240.698	59.2191
WBGene00017336	ugt-41	F10D2.11	4.68e-06	-1.20261	1	negative	12.0315	-14.4692
WBGene00020382		T09B4.8	4.7e-06	-1.04653	1	negative	27.2917	-28.5615
WBGene00017691	ilys-5	F22A3.6	4.93e-06	-0.0659329	1	negative	531.524	-35.0449
WBGene00007282	clec-223	C03E10.5	4.97e-06	-0.670337	1	negative	40.9099	-27.4234
WBGene00001638	gly-13	B0416.6	5.07e-06	1.53965	1	positive	20.8146	32.0471
WBGene00008669	acs-14	F11A3.1	5.18e-06	-1.08114	1	negative	33.836	-36.5815
WBGene00021960	tmem-258	Y57E12AM.1	5.19e-06	0.503324	1	positive	98.6375	49.6466
WBGene00003055	lon-1	F48E8.1	5.2e-06	-0.684958	1	negative	51.9157	-35.5601
WBGene00003658	nhr-68	H12C20.3	5.25e-06	-0.936506	1	negative	34.7573	-32.5504
WBGene00004467	rpn-11	K07D4.3	5.3e-06	0.27548	1	positive	317.347	87.4225
WBGene00016103	dpyd-1	C25F6.3	5.43e-06	-0.77347	1	negative	43.0485	-33.2967
WBGene00008205	sams-1	C49F5.1	5.46e-06	-0.154251	1	negative	310.01	-47.8194
WBGene00006575	tir-1	F13B10.1	5.53e-06	-1.12998	1	negative	12.6462	-14.2899
WBGene00016391	lonp-1	C34B2.6	5.61e-06	0.421921	1	positive	133.148	56.1778
WBGene00004969	spe-15	F47G6.4	5.68e-06	-2.62219	0	negative	6.90015	-18.0935
WBGene00000674	col-99	F29C4.8	5.73e-06	-2.67045	0	negative	1.83593	-4.90276
WBGene00006444	shn-1	C33B4.3	5.77e-06	-2.56915	0	negative	5.33694	-13.7114
WBGene00009306	maph-1.1	F32A7.5	5.85e-06	-1.14664	0	negative	28.4408	-32.6114
WBGene00004505	rpt-5	F56H1.4	5.86e-06	0.266587	0	positive	332.765	88.7108
WBGene00002138	inx-16	R12E2.5	5.98e-06	-1.64153	0	negative	18.0916	-29.6977
WBGene00001784	gst-36	R07B1.4	5.99e-06	-1.40286	0	negative	22.0121	-30.8798
WBGene00013255	tric-1B.1	Y57A10A.10	6.19e-06	-2.35851	0	negative	12.5316	-29.5559
WBGene00011732	arrd-17	T12D8.4	6.2e-06	-3.28458	0	negative	6.2008	-20.367
WBGene00019757	memb-2	M03E7.5	6.31e-06	0.779581	0	positive	58.5043	45.6088
WBGene00001606	gln-5	F26D10.10	6.32e-06	0.184304	0	positive	365.308	67.3275
WBGene00008480	eif-2A	E04D5.1	6.39e-06	0.229895	0	positive	429.128	98.6542
WBGene00009340	best-14	F32G8.4	6.53e-06	-1.05785	0	negative	29.9513	-31.6839
WBGene00002217	klp-4	F56E3.3	6.55e-06	-1.98544	0	negative	15.2732	-30.324
WBGene00008745		F13E6.1	6.59e-06	-0.690706	0	negative	57.494	-39.7114
WBGene00003566	ncx-1	Y113G7A.4	6.64e-06	-1.99551	0	negative	16.9999	-33.9234
WBGene00012276	his-74	W05B10.1	6.65e-06	0.298731	0	positive	185.104	55.2965
WBGene00015930	cest-4	C17H12.4	6.66e-06	-0.921165	0	negative	22.6866	-20.8981
WBGene00011066	ztf-15	R06C7.9	6.7e-06	-0.643609	0	negative	83.4693	-53.7216
WBGene00017746		F23F1.5	6.75e-06	0.755973	0	positive	94.5286	71.4611
WBGene00015095		B0261.7	6.76e-06	0.448135	0	positive	194.737	87.2686
WBGene00003978	pes-4	Y119D3B.17	6.98e-06	-2.44094	0	negative	8.59981	-20.9916
WBGene00007653	cysl-1	C17G1.7	7e-06	-1.93778	0	negative	13.7997	-26.7407
WBGene00001686	gpd-4	F33H1.2	7.18e-06	0.23444	0	positive	238.895	56.0067
WBGene00013139		Y53C12A.3	7.31e-06	0.917342	0	positive	52.1201	47.812
WBGene00017238		F08B4.7	7.31e-06	0.610482	0	positive	89.7932	54.8172
WBGene00008164		C47G2.3	7.58e-06	0.816483	0	positive	41.5294	33.908
WBGene00002005	hsp-1	F26D10.3	7.62e-06	0.0219802	0	positive	3831.95	84.2271
WBGene00015433		C04E12.2	7.67e-06	-1.55217	0	negative	9.8702	-15.3202
WBGene00000225	atgp-2	C38C6.2	7.75e-06	-1.4463	0	negative	25.2574	-36.5298
WBGene00000441	ceh-18	ZC64.3	7.86e-06	-3.19595	0	negative	6.21522	-19.8636
WBGene00021939		Y55F3BR.2	7.98e-06	-1.0785	0	negative	16.173	-17.4425
WBGene00018990	klf-1	F56F11.3	7.99e-06	-2.54292	0	negative	7.9015	-20.0929
WBGene00000064	act-2	T04C12.5	8.24e-06	0.0444122	0	positive	1478.81	65.6772
WBGene00001813	haf-3	F57A10.3	8.28e-06	0.518563	0	positive	102.196	52.995
WBGene00004703	rsp-6	C33H5.12	8.44e-06	0.22951	0	positive	260.806	59.8574
WBGene00019841		R02F11.3	8.45e-06	-2.4337	0	negative	11.929	-29.0315
WBGene00015057	gad-3	B0222.9	8.48e-06	-1.73899	0	negative	13.245	-23.0329
WBGene00044188		F28F8.9	8.64e-06	0.979579	0	positive	43.0171	42.1386
WBGene00013100	zip-7	Y51H4A.4	8.66e-06	-3.13439	0	negative	1.12059	-3.51235
WBGene00020012		R11G1.6	8.66e-06	-2.79078	0	negative	7.54977	-21.0697
WBGene00003171	mec-7	ZK154.3	8.67e-06	-2.50359	0	negative	7.03786	-17.6199
WBGene00010703		K09A9.6	8.74e-06	-2.15931	0	negative	12.5839	-27.1725
WBGene00019268		H41C03.1	8.81e-06	-2.69476	0	negative	8.57365	-23.1039
WBGene00017027		D1044.1	8.88e-06	-2.76287	0	negative	5.23335	-14.4591
WBGene00006640	tsp-14	F39C12.3	8.98e-06	-3.0945	0	negative	3.36731	-10.4201
WBGene00016266	idhg-2	C30F12.7	9.01e-06	-1.30436	0	negative	21.2312	-27.6931
WBGene00018055		F35F10.5	9.06e-06	-2.14107	0	negative	6.70878	-14.364
WBGene00015464		C05C8.7	9.09e-06	-0.668883	0	negative	42.1974	-28.2251
WBGene00009921		F52B5.2	9.12e-06	0.515098	0	positive	142.294	73.2952
WBGene00000991	dhs-28	M03A8.1	9.26e-06	-0.616465	0	negative	68.3538	-42.1377
WBGene00017490	pud-2.1	F15E11.1	9.35e-06	-4.4024	0	negative	1.07544	-4.7345
WBGene00020895	plpp-1.2	T28D9.3	9.39e-06	-2.39351	0	negative	9.02846	-21.6097
WBGene00044191		F43D2.6	9.42e-06	-1.63728	0	negative	15.9571	-26.1261
WBGene00022791		ZK686.1	9.72e-06	0.758226	0	positive	60.0825	45.5561
WBGene00000221	atf-4	T04C10.4	9.75e-06	-0.430023	0	negative	85.3998	-36.7239
WBGene00017441		F13H8.8	9.76e-06	-1.94663	0	negative	2.01795	-3.9282
WBGene00006893	spon-1	F10E7.4	1.02e-05	-1.30552	0	negative	28.0903	-36.6725
WBGene00007812		C29F7.3	1.02e-05	-0.722822	0	negative	46.9312	-33.9229
WBGene00008515		F02C12.1	1.03e-05	-2.36084	0	negative	10.1359	-23.9293
WBGene00018271	ctsa-1.1	F41C3.5	1.04e-05	-0.0844446	0	negative	541.371	-45.7159
WBGene00010131		F55H2.5	1.06e-05	-1.01457	0	negative	37.5429	-38.09
WBGene00019294		K02A6.3	1.06e-05	-3.54732	0	negative	5.84376	-20.7297
WBGene00019353		K03B4.1	1.07e-05	0.652764	0	positive	71.8207	46.882
WBGene00010339	acl-1	F59F4.4	1.08e-05	0.941815	0	positive	50.7229	47.7716
WBGene00020195		T03G6.3	1.08e-05	-1.52513	0	negative	20.6154	-31.4412
WBGene00006602	tps-1	ZK54.2	1.12e-05	-1.85783	0	negative	15.6674	-29.1073
WBGene00000982	dhs-19	T11F9.11	1.18e-05	-0.977532	0	negative	35.1765	-34.3861
WBGene00004033	pkc-2	E01H11.1	1.18e-05	-1.4774	0	negative	26.366	-38.9531
WBGene00011985		T24D1.2	1.19e-05	0.555863	0	positive	146.484	81.4248
WBGene00021192		Y14H12B.2	1.19e-05	0.561573	0	positive	131.681	73.9487
WBGene00022399		Y97E10AR.4	1.19e-05	0.631354	0	positive	101.074	63.8134
WBGene00003902	pab-1	Y106G6H.2	1.2e-05	-0.0523267	0	negative	1532.51	-80.191
WBGene00001177	egl-8	B0348.4	1.21e-05	-1.08027	0	negative	36.8855	-39.8464
WBGene00022856	cth-2	ZK1127.10	1.22e-05	-0.214572	0	negative	193.835	-41.5914
WBGene00004311	ras-2	F17C8.4	1.23e-05	-1.70079	0	negative	16.4009	-27.8944
WBGene00004400	rom-1	F26F4.3	1.23e-05	-1.90688	0	negative	12.656	-24.1336
WBGene00016957	atic-1	C55F2.1	1.23e-05	-0.629087	0	negative	48.4616	-30.4866
WBGene00018909	slx-1	F56A3.2	1.23e-05	0.619029	0	positive	99.2148	61.4168
WBGene00002034	htp-3	F57C9.5	1.25e-05	0.532112	0	positive	123.403	65.6642
WBGene00007071		AC3.5	1.26e-05	-0.679288	0	negative	48.3239	-32.8258
WBGene00004736	sca-1	K11D9.2	1.28e-05	-0.13647	0	negative	569.838	-77.7657
WBGene00007766		C27C7.1	1.28e-05	-0.144609	0	negative	120.282	-17.3938
WBGene00003776	nmy-1	F52B10.1	1.3e-05	-0.365513	0	negative	85.7939	-31.3588
WBGene00003161	mdf-2	Y69A2AR.30	1.31e-05	0.428996	0	positive	144.924	62.1717
WBGene00007900		C33D9.6	1.33e-05	-2.60179	0	negative	4.92054	-12.8022
WBGene00021895	clec-84	Y54G2A.33	1.33e-05	-1.86758	0	negative	10.9466	-20.4436
WBGene00008511		F01G10.9	1.34e-05	-5.04137	0	negative	1.65195	-8.32809
WBGene00015050	clec-51	B0218.6	1.34e-05	-1.53957	0	negative	16.8975	-26.0149
WBGene00003923	pas-2	D1054.2	1.4e-05	0.238383	0	positive	237.424	56.598
WBGene00004723	sap-49	C08B11.5	1.42e-05	0.433004	0	positive	149.301	64.648
WBGene00018249		F40H3.1	1.42e-05	-1.10861	0	negative	23.2707	-25.7981
WBGene00008412		D2030.2	1.44e-05	0.422346	0	positive	114.37	48.3038
WBGene00006826	unc-97	F14D12.2	1.46e-05	-1.16564	0	negative	25.5093	-29.7345
WBGene00001862	him-3	ZK381.1	1.47e-05	0.506898	0	positive	125.991	63.8643
WBGene00004112	pqn-22	C46G7.4	1.47e-05	-0.291828	0	negative	127.289	-37.1466
WBGene00001508	fut-8	C10F3.6	1.49e-05	-2.71521	0	negative	8.3871	-22.7728
WBGene00001511	fzy-1	ZK177.6	1.54e-05	0.329973	0	positive	263.977	87.1054
WBGene00008148		C47E12.3	1.54e-05	0.565097	0	positive	82.8176	46.8
WBGene00004338	rfc-2	F58F6.4	1.56e-05	0.610182	0	positive	85.913	52.4225
WBGene00006852	unc-129	C53D6.2	1.57e-05	-3.42107	0	negative	2.06914	-7.07868
WBGene00013270		Y57A10A.31	1.57e-05	0.305307	0	positive	206.752	63.1227
WBGene00016838		C50F2.4	1.58e-05	-2.37471	0	negative	9.85144	-23.3943
WBGene00011102		R07E3.1	1.63e-05	-0.961017	0	negative	31.9338	-30.6889
WBGene00013030		Y49E10.4	1.63e-05	0.611533	0	positive	76.2996	46.6597
WBGene00016535		C39D10.8	1.66e-05	-1.68469	0	negative	11.7238	-19.751
WBGene00001685	gpd-3	K10B3.7	1.68e-05	-0.181512	0	negative	215.902	-39.1889
WBGene00010726		K09E9.3	1.68e-05	1.05522	0	positive	30.5412	32.2278
WBGene00022257	puf-11	Y73B6BL.38	1.68e-05	0.157595	0	positive	446.761	70.4071
WBGene00002063	ife-5	Y57A10A.30	1.7e-05	-1.3323	0	negative	16.6102	-22.1297
WBGene00004257	pxn-2	K09C8.5	1.7e-05	-2.71305	0	negative	3.9159	-10.624
WBGene00018483		F45F2.11	1.7e-05	0.354132	0	positive	147.597	52.2687
WBGene00001790	gst-42	D1053.1	1.71e-05	-1.74282	0	negative	16.2434	-28.3093
WBGene00002855	let-721	C05D11.12	1.72e-05	-0.458294	0	negative	192.046	-88.0136
WBGene00010909	cisd-3.1	M88.7	1.72e-05	0.9064	0	positive	51.8447	46.992
WBGene00004460	rpn-3	C30C11.2	1.73e-05	0.194916	0	positive	414.904	80.8714
WBGene00016354	rig-6	C33F10.5	1.73e-05	-1.61788	0	negative	15.5397	-25.1413
WBGene00002038	hum-5	T02C12.1	1.74e-05	-1.08525	0	negative	34.3255	-37.2517
WBGene00000147	aph-1	VF36H2L.1	1.8e-05	0.836929	0	positive	52.2429	43.7236
WBGene00004976	spe-41	K01A11.4	1.8e-05	-2.13586	0	negative	7.08382	-15.1301
WBGene00003783	nos-1	R03D7.7	1.81e-05	0.883151	0	positive	62.9003	55.5504
WBGene00015043	cyp-34A8	B0213.14	1.81e-05	-1.39124	0	negative	17.0347	-23.6993
WBGene00021882	nprt-1	Y54G2A.17	1.82e-05	0.39937	0	positive	106.782	42.6455
WBGene00016749		C48E7.1	1.84e-05	-1.35938	0	negative	19.9731	-27.1509
WBGene00004244	puf-8	C30G12.7	1.86e-05	0.331897	0	positive	194.7	64.6204
WBGene00003623	nhr-25	F11C1.6	1.87e-05	-2.15785	0	negative	1.86675	-4.02818
WBGene00016458		C35E7.6	1.89e-05	-1.21167	0	negative	10.8096	-13.0976
WBGene00021352	pcyt-2.1	Y37E3.11	1.89e-05	0.497862	0	positive	104.607	52.0796
WBGene00016263		C30F12.4	1.9e-05	0.585216	0	positive	105.934	61.9946
WBGene00012364	zmp-4	W09D12.1	1.92e-05	-0.968423	0	negative	32.1686	-31.1528
WBGene00017184	ncam-1	F02G3.1	1.94e-05	-1.22246	0	negative	7.02792	-8.59135
WBGene00001669	gpa-7	R10H10.5	1.96e-05	-2.74149	0	negative	5.12553	-14.0516
WBGene00010479		K01G5.8	1.99e-05	0.676617	0	positive	61.2775	41.4614
WBGene00001915	his-41	C50F4.5	2.02e-05	-1.43291	0	negative	16.1058	-23.0782
WBGene00002045	icd-1	C56C10.8	2.02e-05	0.0448903	0	positive	1382.69	62.0692
WBGene00003588	nex-1	ZC155.1	2.02e-05	-0.287245	0	negative	176.832	-50.7943
WBGene00006824	unc-95	Y105E8A.6	2.04e-05	-2.12274	0	negative	10.267	-21.7941
WBGene00015817		C16A11.4	2.06e-05	0.675891	0	positive	96.0167	64.8969
WBGene00007479		C09F9.2	2.08e-05	-1.72592	0	negative	0.856266	-1.47785
WBGene00022499	set-30	ZC8.3	2.16e-05	-2.93882	0	negative	6.37883	-18.7463
WBGene00000463	ceh-43	C28A5.4	2.19e-05	-1.12202	0	negative	7.47731	-8.38968
WBGene00008563		F07H5.13	2.21e-05	-1.07394	0	negative	3.90543	-4.19421
WBGene00006493	ivns-1	R09A8.3	2.24e-05	-0.518768	0	negative	79.4162	-41.1986
WBGene00019854		R03H10.1	2.24e-05	-3.2673	0	negative	4.92321	-16.0856
WBGene00019997		R10F2.6	2.26e-05	-2.22655	0	negative	4.64925	-10.3518
WBGene00022787	tag-307	ZK652.10	2.27e-05	0.505489	0	positive	105.315	53.2354
WBGene00000985	dhs-22	C15H11.4	2.28e-05	0.359277	0	positive	172.039	61.8095
WBGene00000277	cab-1	C23H4.1	2.29e-05	-0.519818	0	negative	70.8887	-36.8492
WBGene00021560	coh-4	Y45G5AM.8	2.3e-05	1.02937	0	positive	42.9808	44.2432
WBGene00016739	pitr-1	C48A7.2	2.33e-05	0.161084	0	positive	285.978	46.0666
WBGene00019994	cdh-1	R10F2.1	2.34e-05	-3.25896	0	negative	3.50417	-11.42
WBGene00010834	mct-3	M03B6.2	2.35e-05	-0.621791	0	negative	55.7254	-34.6496
WBGene00006438	nrfl-1	C01F6.6	2.37e-05	-0.63402	0	negative	52.0664	-33.0111
WBGene00011941		T23B5.4	2.39e-05	1.87836	0	positive	15.0298	28.2314
WBGene00008100		C44H9.5	2.42e-05	-2.83097	0	negative	4.77487	-13.5175
WBGene00001055	dpf-2	C27C12.7	2.43e-05	-0.825224	0	negative	35.4458	-29.2507
WBGene00002181	kal-1	K03D10.1	2.46e-05	-1.54871	0	negative	5.97936	-9.2603
WBGene00016799		C50C3.1	2.47e-05	0.653305	0	positive	91.1897	59.5747
WBGene00001163	efn-2	C43F9.8	2.48e-05	-3.61244	0	negative	3.17463	-11.4682
WBGene00017657		F21C10.7	2.48e-05	-1.34741	0	negative	17.1512	-23.1098
WBGene00011573	anmt-3	T07C12.9	2.5e-05	-1.27703	0	negative	19.0006	-24.2643
WBGene00022653		ZK105.1	2.5e-05	-0.181335	0	negative	113.625	-20.6042
WBGene00020839	usp-5	T27A3.2	2.51e-05	0.385108	0	positive	192.083	73.9726
WBGene00021247		Y22D7AL.9	2.54e-05	-1.61671	0	negative	14.1282	-22.8411
WBGene00001569	meg-3	F52D2.4	2.55e-05	0.523023	0	positive	107.745	56.3532
WBGene00015580	cls-1	C07H6.3	2.56e-05	-2.10705	0	negative	14.4952	-30.5421
WBGene00017571	jmjd-3.1	F18E9.5	2.56e-05	-2.36447	0	negative	4.49198	-10.6211
WBGene00007784	ruvb-1	C27H6.2	2.57e-05	0.34668	0	positive	188.069	65.1997
WBGene00000444	ceh-21	T26C11.6	2.61e-05	1.07504	0	positive	34.1635	36.727
WBGene00008548		F07A11.5	2.62e-05	-2.37352	0	negative	9.11945	-21.6452
WBGene00012239		W04A8.4	2.63e-05	-0.665946	0	negative	5.81536	-3.87271
WBGene00007201	exos-4.1	B0564.1	2.66e-05	1.01518	0	positive	27.369	27.7845
WBGene00013633		Y105C5A.8	2.68e-05	-1.40428	0	negative	17.9663	-25.2297
WBGene00022591	cuti-1	ZC328.1	2.69e-05	-5.28135	0	negative	0.887424	-4.6868
WBGene00002173	itr-1	F33D4.2	2.7e-05	-0.875139	0	negative	34.4943	-30.1873
WBGene00012073	cpd-2	T27A8.1	2.71e-05	-2.93098	0	negative	5.02712	-14.7344
WBGene00016201	tdo-2	C28H8.11	2.75e-05	-0.788733	0	negative	40.1522	-31.6694
WBGene00011318	cdt-2	T01C3.1	2.76e-05	0.320462	0	positive	153.489	49.1875
WBGene00015425		C04E6.11	2.76e-05	0.712132	0	positive	70.9382	50.5174
WBGene00044650		Y71G10AR.4	2.76e-05	0.572168	0	positive	75.4898	43.1929
WBGene00006479	tmbi-4	B0563.4	2.82e-05	-0.964901	0	negative	43.4446	-41.9198
WBGene00015297	sco-1	C01F1.2	2.82e-05	0.820483	0	positive	48.0707	39.4411
WBGene00017274		F08F8.9	2.83e-05	0.366153	0	positive	163.079	59.712
WBGene00007350	sucl-1	C05G5.4	2.9e-05	-0.494302	0	negative	107.46	-53.1176
WBGene00010492	meg-1	K02B9.1	2.91e-05	0.19189	0	positive	253.311	48.6079
WBGene00011374		T02D1.8	3.05e-05	-1.38684	0	negative	18.9241	-26.2447
WBGene00010742		K10D6.2	3.08e-05	-2.96301	0	negative	2.03762	-6.03748
WBGene00019760	calu-1	M03F4.7	3.09e-05	-0.21887	0	negative	179.898	-39.3742
WBGene00001604	gln-3	Y105C5B.28	3.13e-05	-0.190202	0	negative	135.095	-25.6953
WBGene00016163		C27D9.1	3.14e-05	0.532369	0	positive	131.673	70.0989
WBGene00000784	cpr-4	F44C4.3	3.17e-05	-0.0682439	0	negative	365.835	-24.966
WBGene00008621		F09C8.1	3.17e-05	-2.05851	0	negative	7.15099	-14.7204
WBGene00018174		F38B6.4	3.23e-05	-1.16384	0	negative	19.3196	-22.485
WBGene00020182	ugt-53	T03D3.1	3.24e-05	-1.507	0	negative	9.29658	-14.0099
WBGene00001942	his-68	T23D8.6	3.25e-05	0.69164	0	positive	43.7909	30.2876
WBGene00007139	mnp-1	B0285.7	3.3e-05	-0.738514	0	negative	5.68536	-4.19871
WBGene00021763		Y51F10.2	3.3e-05	0.166735	0	positive	388.617	64.796
WBGene00014153	vab-23	ZK930.3	3.31e-05	-3.28424	0	negative	2.03355	-6.67865
WBGene00002253	lbp-1	F40F4.3	3.32e-05	-0.398198	0	negative	38.2532	-15.2323
WBGene00006912	vha-3	Y38F2AL.4	3.34e-05	-0.410307	0	negative	93.1164	-38.2063
WBGene00019842		R02F11.4	3.34e-05	0.630054	0	positive	98.0484	61.7758
WBGene00007170		B0393.5	3.35e-05	-5.5703	0	negative	1.09276	-6.08702
WBGene00010281		F58G11.3	3.35e-05	0.381638	0	positive	165.107	63.011
WBGene00006588	tnt-3	C14F5.3	3.36e-05	-0.615829	0	negative	58.6223	-36.1013
WBGene00009453		F36A2.3	3.36e-05	-1.18185	0	negative	35.99	-42.5348
WBGene00010868	somi-1	M04G12.4	3.4e-05	-1.32314	0	negative	11.1261	-14.7215
WBGene00006508	tns-1	M01E11.7	3.42e-05	-0.818109	0	negative	25.7963	-21.1042
WBGene00012390	gpap-1	Y6B3B.5	3.43e-05	1.86639	0	positive	20.0264	37.3771
WBGene00000423	ced-9	T07C4.8	3.45e-05	0.577695	0	positive	108.993	62.9646
WBGene00044644		B0205.13	3.47e-05	1.42877	0	positive	5.57383	7.96374
WBGene00014141		ZK899.2	3.67e-05	-0.952433	0	negative	26.9209	-25.6404
WBGene00011398	qdpr-1	T03F6.1	3.71e-05	-0.576413	0	negative	63.6752	-36.7032
WBGene00021640		Y47G6A.14	3.72e-05	0.801838	0	positive	44.4061	35.6065
WBGene00016893		C53B7.2	3.74e-05	-1.45538	0	negative	17.7409	-25.8198
WBGene00020436		T12A2.1	3.75e-05	-3.03154	0	negative	6.33956	-19.2186
WBGene00012796		Y43F4A.1	3.76e-05	-3.20258	0	negative	3.8133	-12.2124
WBGene00016061	hpo-15	C24G6.6	3.76e-05	-0.706601	0	negative	39.0178	-27.57
WBGene00014697	cyp-25A3	C36A4.3	3.78e-05	-2.01108	0	negative	8.1897	-16.4702
WBGene00019819	aass-1	R02D3.1	3.79e-05	-0.496032	0	negative	89.6174	-44.4531
WBGene00017768		F25B4.5	3.8e-05	0.432946	0	positive	146.204	63.2983
WBGene00001516	gap-2	ZK899.8	3.9e-05	0.845179	0	positive	55.7981	47.1594
WBGene00019489		K07E1.1	3.9e-05	-1.28235	0	negative	14.5297	-18.6322
WBGene00008258	mans-2	C52E4.5	3.96e-05	-0.911764	0	negative	35.3844	-32.2622
WBGene00012158	ucr-2.1	VW06B3R.1	3.96e-05	-0.491429	0	negative	93.0568	-45.7308
WBGene00019683		K12H6.2	3.96e-05	2.6181	0	positive	9.14279	23.9367
WBGene00015172		B0410.3	3.99e-05	-1.8219	0	negative	9.07448	-16.5328
WBGene00019064	myo-5	F58G4.1	3.99e-05	-1.29577	0	negative	18.4346	-23.887
WBGene00011440	sfxn-1.5	T04F8.1	4.02e-05	0.988755	0	positive	32.0314	31.6712
WBGene00015056		B0222.5	4.04e-05	-1.80063	0	negative	12.7801	-23.0123
WBGene00012514		Y26E6A.3	4.05e-05	-2.39286	0	negative	9.10663	-21.7909
WBGene00007228	acs-7	C01G6.7	4.06e-05	-1.92675	0	negative	9.38698	-18.0864
WBGene00016055		C24D10.4	4.09e-05	0.664996	0	positive	75.0632	49.9167
WBGene00009448	zfp-2	F35H8.3	4.1e-05	0.643835	0	positive	98.9088	63.681
WBGene00011236		R11A8.1	4.14e-05	-0.798876	0	negative	38.0891	-30.4284
WBGene00006839	unc-115	F09B9.2	4.15e-05	-0.584417	0	negative	40.6376	-23.7493
WBGene00013203		Y54E5A.8	4.15e-05	-3.11019	0	negative	6.34378	-19.7304
WBGene00000215	asp-2	T18H9.2	4.17e-05	-0.0816756	0	negative	601.989	-49.1678
WBGene00018682	aagr-4	F52D1.1	4.18e-05	-1.43312	0	negative	11.7372	-16.8209
WBGene00021469		Y39G10AR.11	4.19e-05	-0.574561	0	negative	22.543	-12.9523
WBGene00010177		F57A8.1	4.2e-05	-1.51553	0	negative	11.278	-17.0922
WBGene00003830	num-1	T03D8.1	4.22e-05	0.476005	0	positive	182.45	86.8473
WBGene00000469	ces-2	ZK909.4	4.23e-05	-2.24653	0	negative	1.11529	-2.50553
WBGene00002134	inx-12	ZK770.3	4.24e-05	-0.84214	0	negative	41.7643	-35.1714
WBGene00018304	agr-1	F41G3.12	4.29e-05	-4.91193	0	negative	1.53312	-7.53056
WBGene00021036		W05F2.4	4.29e-05	-1.59061	0	negative	17.4278	-27.7209
WBGene00019938		R07E4.5	4.3e-05	0.778029	0	positive	44.334	34.4931
WBGene00013719		Y106G6H.6	4.33e-05	0.528475	0	positive	135.543	71.6313
WBGene00004808	skr-2	F46A9.4	4.35e-05	0.330965	0	positive	216.301	71.5879
WBGene00000984	dhs-21	R11D1.11	4.42e-05	-1.64933	0	negative	10.8856	-17.9539
WBGene00008032		C39E9.8	4.42e-05	-0.457752	0	negative	74.1081	-33.9231
WBGene00021415	nsy-4	Y38F2AL.1	4.43e-05	-1.85759	0	negative	3.18469	-5.91586
WBGene00002135	inx-13	Y8G1A.2	4.46e-05	-0.964246	0	negative	30.7569	-29.6572
WBGene00016641		C44C1.1	4.46e-05	-1.52416	0	negative	13.4013	-20.4256
WBGene00006562	tdc-1	K01C8.3	4.5e-05	0.145933	0	positive	316.748	46.2239
WBGene00003089	ltd-1	K02C4.4	4.53e-05	-3.97693	0	negative	2.23926	-8.90539
WBGene00013869	mlck-1	ZC373.4	4.6e-05	-1.5722	0	negative	15.3393	-24.1164
WBGene00015613		C08F1.10	4.6e-05	-1.07487	0	negative	2.52985	-2.71926
WBGene00016006	fln-2	C23F12.1	4.62e-05	-0.726865	0	negative	34.5249	-25.0949
WBGene00017003		D1007.5	4.64e-05	0.6673	0	positive	85.0722	56.7687
WBGene00021486	lbp-9	Y40B10A.1	4.66e-05	0.0814645	0	positive	563.823	45.9316
WBGene00012716		Y39E4B.5	4.7e-05	0.499799	0	positive	120.357	60.1543
WBGene00007750	syg-2	C26G2.1	4.73e-05	-2.82868	0	negative	3.63196	-10.2736
WBGene00009272	gras-1	F30F8.3	4.74e-05	0.50217	0	positive	122.812	61.6726
WBGene00017979		F32B5.6	4.76e-05	-1.26681	0	negative	25.2937	-32.0421
WBGene00019170		H06I04.6	4.78e-05	-2.40753	0	negative	8.50819	-20.4837
WBGene00004990	spp-5	T08A9.9	4.83e-05	-0.121238	0	negative	277.258	-33.6141
WBGene00011112		R07E5.4	4.83e-05	-1.26157	0	negative	16.7632	-21.148
WBGene00004466	rpn-10	B0205.3	4.84e-05	0.299037	0	positive	194.841	58.2646
WBGene00021525		Y41D4B.26	4.86e-05	-4.70967	0	negative	0.225353	-1.06134
WBGene00012231		W04A4.2	4.91e-05	-1.61136	0	negative	12.364	-19.9229
WBGene00022590		ZC317.7	4.91e-05	-1.0377	0	negative	14.5157	-15.0629
WBGene00011087		R07B7.2	4.92e-05	0.648966	0	positive	96.4778	62.6108
WBGene00004739	scd-1	H20J18.1	4.94e-05	-0.691702	0	negative	26.9213	-18.6215
WBGene00000874	cyk-3	ZK328.1	5.01e-05	0.710299	0	positive	86.6753	61.5654
WBGene00004875	smd-1	F47G4.7	5.01e-05	-0.339516	0	negative	108.229	-36.7453
WBGene00010850		M04C3.1	5.01e-05	-1.3914	0	negative	15.6195	-21.7329
WBGene00009475		F36F2.1	5.03e-05	-3.31117	0	negative	4.91618	-16.2783
WBGene00006814	unc-82	B0496.3	5.04e-05	-1.77959	0	negative	11.4415	-20.3611
WBGene00008436		DH11.2	5.04e-05	-0.889398	0	negative	26.0821	-23.1973
WBGene00002137	inx-15	R12E2.9	5.07e-05	-1.51321	0	negative	14.871	-22.5028
WBGene00018974	fcho-1	F56D12.6	5.09e-05	-0.593463	0	negative	118.754	-70.4764
WBGene00000692	col-118	T11B7.3	5.1e-05	-2.14624	0	negative	8.57368	-18.4012
WBGene00020455	fbxa-59	T12B5.8	5.12e-05	-2.76265	0	negative	5.16835	-14.2783
WBGene00003238	mig-1	Y34D9B.1	5.13e-05	-2.41367	0	negative	7.32317	-17.6757
WBGene00016291		C31H1.8	5.13e-05	0.399389	0	positive	175.203	69.9744
WBGene00016759		C49A9.5	5.15e-05	-2.42782	0	negative	7.42366	-18.0233
WBGene00003989	pfn-1	Y18D10A.20	5.21e-05	0.15494	0	positive	470.201	72.8527
WBGene00014152		ZK930.2	5.21e-05	-2.15767	0	negative	10.5615	-22.7881
WBGene00007332		C05C10.5	5.24e-05	0.179716	0	positive	385.623	69.3026
WBGene00021852		Y54F10AM.8	5.24e-05	-0.859143	0	negative	42.2899	-36.333
WBGene00013077	ttr-24	Y51A2D.9	5.26e-05	-0.420389	0	negative	71.2711	-29.9615
WBGene00008019		C38H2.2	5.27e-05	-1.60254	0	negative	13.6245	-21.8339
WBGene00007266		C03A3.1	5.3e-05	-5.17335	0	negative	0.749877	-3.87938
WBGene00016677		C45G9.6	5.38e-05	-1.11835	0	negative	21.1612	-23.6657
WBGene00018811	pmt-2	F54D11.1	5.4e-05	-0.0874855	0	negative	545.283	-47.7044
WBGene00009113	maph-1.2	F25D7.4	5.47e-05	0.324215	0	positive	206.04	66.8013
WBGene00018215	igcm-1	F39H12.4	5.49e-05	-3.142	0	negative	0.777157	-2.44182
WBGene00001838	hda-10	Y51H1A.5	5.54e-05	0.912028	0	positive	50.7942	46.3257
WBGene00019989		R09F10.8	5.58e-05	0.401076	0	positive	110.066	44.1447
WBGene00302974		Y65B4BM.3	5.6e-05	-3.55444	0	negative	0.727845	-2.58708
WBGene00185014		F17C8.9	5.61e-05	-2.42052	0	negative	8.2409	-19.9472
WBGene00001945	his-71	F45E1.6	5.68e-05	-2.14023	0	negative	11.3342	-24.2577
WBGene00000067	act-5	T25C8.2	5.77e-05	-0.0960768	0	negative	364.37	-35.0075
WBGene00004459	rpn-2	C23G10.4	5.77e-05	0.181954	0	positive	462.611	84.1737
WBGene00008900		F16H6.10	5.77e-05	-2.23043	0	negative	6.0967	-13.5983
WBGene00194892	dsb-2	F26H11.6	5.78e-05	0.851333	0	positive	61.3236	52.2069
WBGene00004384	rnp-1	ZK863.7	5.99e-05	0.435208	0	positive	146.241	63.6453
WBGene00003072	lrp-2	T21E3.3	6.03e-05	-0.683537	0	negative	37.06	-25.3319
WBGene00015116	paic-1	B0286.3	6.15e-05	-0.812648	0	negative	33.7338	-27.4137
WBGene00012909	spds-1	Y46G5A.19	6.16e-05	-1.38424	0	negative	15.5491	-21.5238
WBGene00013284	daf-22	Y57A10C.6	6.21e-05	-0.644852	0	negative	53.4213	-34.4488
WBGene00019599	acds-10	K09H11.1	6.26e-05	-1.4189	0	negative	19.6241	-27.8446
WBGene00020948	era-1	W02F12.3	6.27e-05	0.157589	0	positive	468.669	73.8571
WBGene00017472	cst-1	F14H12.4	6.31e-05	-2.59745	0	negative	8.23041	-21.378
WBGene00013289	tag-273	Y57G11A.1	6.34e-05	-0.930375	0	negative	16.444	-15.2991
WBGene00020199	metl-9	T03G11.6	6.39e-05	0.952408	0	positive	46.5449	44.3298
WBGene00008238		C50F4.16	6.4e-05	0.646559	0	positive	86.1849	55.7237
WBGene00010018	fbxa-69	F54B8.3	6.4e-05	-3.58903	0	negative	3.13968	-11.2684
WBGene00018948		F56C9.3	6.51e-05	0.366705	0	positive	177.467	65.0781
WBGene00002033	htp-2	Y73B6BL.2	6.54e-05	0.636102	0	positive	63.9015	40.6479
WBGene00019843		R03E9.2	6.54e-05	-3.7928	0	negative	2.31304	-8.77291
WBGene00009336		F32D8.14	6.58e-05	0.640204	0	positive	79.3607	50.8071
WBGene00000380	cct-5	C07G2.3	6.61e-05	0.138769	0	positive	478.906	66.4575
WBGene00011880		T21B6.3	6.73e-05	-1.4426	0	negative	17.6703	-25.4912
WBGene00011123	nuaf-3	R07H5.3	6.77e-05	1.24199	0	positive	33.157	41.1805
WBGene00011446		T04F8.8	6.81e-05	-0.249198	0	negative	123.963	-30.8913
WBGene00016913	lam-2	C54D1.5	6.88e-05	-0.315777	0	negative	37.6744	-11.8967
WBGene00000237	bam-2	Y71F9AR.1	6.93e-05	-2.32909	0	negative	8.3564	-19.4628
WBGene00001475	fmi-1	F15B9.7	6.94e-05	-2.92738	0	negative	1.50044	-4.39237
WBGene00012134		T28F3.8	6.97e-05	-0.890284	0	negative	27.4989	-24.4818
WBGene00012445		Y16B4A.2	7.01e-05	-0.476833	0	negative	71.2542	-33.9764
WBGene00003418	msh-2	H26D21.2	7.16e-05	0.408099	0	positive	145.449	59.3577
WBGene00013805	bca-2	Y116A8C.28	7.17e-05	1.11139	0	positive	36.6255	40.7052
WBGene00007202		B0564.2	7.19e-05	1.28986	0	positive	23.925	30.8599
WBGene00009430		F35E12.6	7.26e-05	-0.419809	0	negative	59.9673	-25.1748
WBGene00004468	rpn-12	ZK20.5	7.3e-05	0.308151	0	positive	175.766	54.1624
WBGene00007593		C14H10.3	7.3e-05	-1.42804	0	negative	16.2214	-23.1649
WBGene00001330	eps-8	Y57G11C.24	7.33e-05	-1.03927	0	negative	31.9952	-33.2518
WBGene00016486	fbxa-170	C36C9.3	7.34e-05	1.15718	0	positive	23.5409	27.2411
WBGene00018955		F56C11.3	7.34e-05	0.87934	0	positive	22.4536	19.7444
WBGene00004312	rba-1	K07A1.11	7.39e-05	0.423861	0	positive	157.203	66.6322
WBGene00003732	nhx-4	F14B8.1	7.42e-05	-2.51381	0	negative	7.14698	-17.9662
WBGene00002266	lec-3	ZK892.1	7.45e-05	-1.27138	0	negative	17.8835	-22.7366
WBGene00012530		Y32F6A.5	7.48e-05	-0.289733	0	negative	177.343	-51.3823
WBGene00016422	noah-1	C34G6.6	7.49e-05	-0.271843	0	negative	7.09645	-1.92912
WBGene00011383		T02E9.5	7.54e-05	-0.728407	0	negative	3.50295	-2.55158
WBGene00016906		C53D5.5	7.56e-05	-1.40967	0	negative	21.1593	-29.8275
WBGene00017620	tofu-2	F20A1.9	7.59e-05	0.635232	0	positive	74.5278	47.3424
WBGene00007142	ttr-18	B0334.1	7.6e-05	-0.958639	0	negative	22.6407	-21.7043
WBGene00002216	klp-3	T09A5.2	7.76e-05	-1.86659	0	negative	10.8027	-20.1643
WBGene00003412	mrp-6	F20B6.3	7.78e-05	-2.54347	0	negative	8.31827	-21.1573
WBGene00011195	sao-1	R10D12.14	7.85e-05	0.118501	0	positive	397.129	47.0603
WBGene00019318		K02E10.4	7.86e-05	-3.41728	0	negative	2.16871	-7.41109
WBGene00016045	spas-1	C24B5.2	7.87e-05	0.481673	0	positive	146.922	70.7686
WBGene00009624	cnc-8	F41E7.8	7.95e-05	-1.1191	0	negative	15.2732	-17.0922
WBGene00015677	cpg-4	C10F3.1	7.99e-05	0.30597	0	positive	181.879	55.6494
WBGene00003812	nrf-5	F55B12.5	8.04e-05	-0.689794	0	negative	62.7779	-43.3038
WBGene00002127	inx-5	R09F10.4	8.05e-05	-1.82918	0	negative	10.1024	-18.4792
WBGene00002248	lam-3	T22A3.8	8.1e-05	-0.545339	0	negative	8.71381	-4.75198
WBGene00001309	emr-1	M01D7.6	8.19e-05	0.476001	0	positive	124.521	59.2723
WBGene00004155	pqn-73	W01C9.3	8.3e-05	-4.44106	0	negative	0.458464	-2.03607
WBGene00007118	npp-22	B0240.4	8.35e-05	0.265296	0	positive	228.013	60.4909
WBGene00006771	tln-1	Y71G12B.11	8.39e-05	-0.494092	0	negative	43.9305	-21.7057
WBGene00015134		B0304.2	8.42e-05	0.820052	0	positive	60.3489	49.4892
WBGene00022817	upp-1	ZK783.2	8.51e-05	0.505418	0	positive	103.461	52.2913
WBGene00000876	cyl-1	C52E4.6	8.52e-05	0.378725	0	positive	130.035	49.2477
WBGene00009082	dlat-1	F23B12.5	8.68e-05	-0.306316	0	negative	292.224	-89.5127
WBGene00016996		D1005.2	8.71e-05	-4.2506	0	negative	2.08151	-8.84765
WBGene00022678	sar-1	ZK180.4	8.75e-05	0.182114	0	positive	224.935	40.9638
WBGene00018138	folt-2	F37B4.7	8.79e-05	-0.0795188	0	negative	423.263	-33.6574
WBGene00003927	pas-6	CD4.6	8.82e-05	0.227504	0	positive	289.493	65.8608
WBGene00002041	hum-8	Y66H1A.6	8.9e-05	-1.48598	0	negative	19.8166	-29.447
WBGene00002996	lin-7	Y54G11A.10	8.94e-05	0.758189	0	positive	43.8411	33.2398
WBGene00006466	tag-115	JC8.13	8.94e-05	0.729841	0	positive	53.8595	39.3089
WBGene00003924	pas-3	Y110A7A.14	8.95e-05	0.195162	0	positive	295.831	57.7348
WBGene00001684	gpd-2	K10B3.8	8.98e-05	-0.237928	0	negative	161.553	-38.4379
WBGene00012436	flh-3	Y11D7A.13	8.99e-05	0.432947	0	positive	68.8598	29.8126
WBGene00019254		H31G24.3	8.99e-05	1.09146	0	positive	31.7861	34.6933
WBGene00022816	fbn-1	ZK783.1	9.01e-05	-0.888083	0	negative	2.23003	-1.98045
WBGene00004831	slo-2	F08B12.3	9.05e-05	-2.61382	0	negative	7.0171	-18.3414
WBGene00013560	zip-12	Y75B8A.29	9.17e-05	-1.62755	0	negative	14.3209	-23.308
WBGene00002250	lap-2	W07G4.4	9.27e-05	0.195281	0	positive	387.653	75.7014
WBGene00012184	mnr-1	W01F3.1	9.29e-05	-1.5808	0	negative	16.6446	-26.3118
WBGene00008354	gcsh-1	D1025.2	9.31e-05	-1.106	0	negative	20.9226	-23.1405
WBGene00003596	ngp-1	T19A6.2	9.34e-05	0.520225	0	positive	100.681	52.3768
WBGene00021351	eif-2alpha	Y37E3.10	9.47e-05	0.15555	0	positive	284.496	44.2533
WBGene00003903	pab-2	F18H3.3	9.49e-05	-0.294916	0	negative	69.189	-20.405
WBGene00044916		F40F8.11	9.54e-05	0.519842	0	positive	158.015	82.1427
WBGene00003933	pat-9	T27B1.2	9.56e-05	-1.82482	0	negative	2.4239	-4.42318
WBGene00006920	vha-11	Y38F2AL.3	9.56e-05	-0.249353	0	negative	195.91	-48.8507
WBGene00013921	best-22	ZC518.1	9.57e-05	-2.51892	0	negative	9.27568	-23.3646
WBGene00017053		D2024.5	9.6e-05	0.655612	0	positive	76.2231	49.9728
WBGene00012481		Y18D10A.11	9.61e-05	0.160439	0	positive	254.757	40.873
WBGene00007507		C10C5.3	9.64e-05	-0.854736	0	negative	17.6719	-15.1048
WBGene00009558		F39B2.8	9.65e-05	-3.05832	0	negative	4.02093	-12.2973
WBGene00044305	rad-8	F56H1.6	9.65e-05	0.798924	0	positive	63.8446	51.007
WBGene00000170	aqp-2	C01G6.1	9.7e-05	-0.154223	0	negative	27.0586	-4.17306
WBGene00020104		R148.5	9.71e-05	-0.973259	0	negative	15.9584	-15.5316
WBGene00000966	dhs-2	F55A12.4	9.73e-05	-1.98704	0	negative	4.36003	-8.66354
WBGene00013256		Y57A10A.13	9.74e-05	0.457676	0	positive	144.625	66.1914
WBGene00044204	suds-3	T07C12.14	9.79e-05	0.465044	0	positive	89.0035	41.3905
WBGene00013694	mekk-3	Y106G6A.1	9.83e-05	-0.991419	0	negative	35.6651	-35.359
WBGene00018877	aman-1	F55D10.1	0.000100227	-0.642975	0	negative	43.4862	-27.9606
WBGene00011571	ttr-46	T07C12.7	0.000100984	-0.318304	0	negative	125.764	-40.031
WBGene00004886	smi-1	Y39A3CR.1	0.00010114	0.899372	0	positive	40.4321	36.3635
WBGene00008832	obr-2	F14H8.1	0.000101312	-1.98807	0	negative	13.0412	-25.9268
WBGene00044488		Y54G2A.45	0.000101586	-0.965621	0	negative	11.8676	-11.4596
WBGene00001814	haf-4	W04C9.1	0.000103166	-1.41008	0	negative	20.3758	-28.7314
WBGene00004463	rpn-7	F49C12.8	0.000104552	0.181723	0	positive	391.188	71.0879
WBGene00001046	dnj-28	Y54E10BL.4	0.00010543	0.306826	0	positive	96.28	29.5413
WBGene00020149		T01D1.4	0.000105867	-1.56133	0	negative	16.5716	-25.8736
WBGene00003375	mlp-1	T04C9.4	0.000106464	-1.27309	0	negative	19.6562	-25.0241
WBGene00016022		C23H3.9	0.000106502	-1.66544	0	negative	9.29739	-15.4842
WBGene00021919	cutl-25	Y55D5A.6	0.000106975	-4.6384	0	negative	0.795008	-3.68757
WBGene00009186	trcs-1	F27C8.6	0.000107288	0.0817762	0	positive	689.008	56.3445
WBGene00011498		T05G5.1	0.000108445	-0.708533	0	negative	12.1029	-8.57533
WBGene00011763		T14B1.1	0.000109549	-3.27156	0	negative	2.89402	-9.46796
WBGene00010772		K11D9.3	0.000110215	-2.68982	0	negative	6.8808	-18.5081
WBGene00017714		F22F1.2	0.000110745	-4.68586	0	negative	0.345461	-1.61878
WBGene00017969	ctsa-3.1	F32A5.3	0.000111069	-0.930642	0	negative	31.2428	-29.0759
WBGene00009441	wdr-48	F35G12.4	0.0001116	0.600697	0	positive	116.023	69.6945
WBGene00020146	got-1.2	T01C8.5	0.000111982	-1.04964	0	negative	28.5851	-30.0041
WBGene00010595	haao-1	K06A4.5	0.000112044	-1.35522	0	negative	18.9516	-25.6835
WBGene00002163	ist-1	C54D1.3	0.000112397	-3.41083	0	negative	3.86458	-13.1814
WBGene00017678	asp-12	F21F8.4	0.000112808	-0.277536	0	negative	15.3994	-4.2739
WBGene00022618		ZC477.3	0.00011295	0.601789	0	positive	100.327	60.3755
WBGene00013025	vha-13	Y49A3A.2	0.000113518	-0.122555	0	negative	527.424	-64.6387
WBGene00018885	drd-5	F55E10.6	0.000113803	-1.1439	0	negative	15.4012	-17.6174
WBGene00019823	fnta-1	R02D3.5	0.000114446	0.571134	0	positive	76.672	43.79
WBGene00016907		C53H9.2	0.000114475	0.234136	0	positive	185.683	43.475
WBGene00009081		F23B12.4	0.000114633	-1.78023	0	negative	12.9442	-23.0438
WBGene00004320	rbx-1	ZK287.5	0.000115877	0.317561	0	positive	157.217	49.9262
WBGene00003813	nrf-6	C08B11.4	0.000115972	-0.413092	0	negative	67.642	-27.9424
WBGene00015650	pkg-2	C09G4.2	0.000116429	-0.750554	0	negative	46.6258	-34.9951
WBGene00004178	prg-1	D2030.6	0.000116546	0.184741	0	positive	352.739	65.1653
WBGene00008062	set-32	C41G7.4	0.000116919	1.15723	0	positive	30.0112	34.7299
WBGene00000527	cle-1	C36B1.1	0.000118044	-1.0671	0	negative	28.8206	-30.7544
WBGene00004339	rfc-3	C39E9.13	0.000118619	0.31508	0	positive	210.843	66.4323
WBGene00013610	fbxa-206	Y102A5C.1	0.000118743	0.943219	0	positive	43.5791	41.1046
WBGene00021638		Y47G6A.9	0.00011941	0.729567	0	positive	43.2624	31.5628
WBGene00011392	sbt-1	T03D8.3	0.000119502	-0.934753	0	negative	30.0237	-28.0648
WBGene00017301	hach-1	F09F7.4	0.000119728	-0.124692	0	negative	336.985	-42.0194
WBGene00004046	plp-1	F45E4.2	0.000120087	0.102869	0	positive	444.204	45.6947
WBGene00006970	zag-1	F28F9.1	0.000120655	-2.96727	0	negative	1.33728	-3.96809
WBGene00000831	ctl-2	Y54G11A.5	0.000120691	-0.58832	0	negative	54.7849	-32.231
WBGene00019509		K07H8.9	0.00012078	1.2076	0	positive	28.2242	34.0837
WBGene00010811	hmit-1.3	M01F1.5	0.000121383	-1.62064	0	negative	13.1144	-21.2537
WBGene00015092	mrpl-47	B0261.4	0.000121543	0.743974	0	positive	61.6749	45.8845
WBGene00003865	oma-2	ZC513.6	0.000122455	0.115045	0	positive	744.134	85.6086
WBGene00001898	his-24	M163.3	0.000122653	-0.0902429	0	negative	41.8784	-3.77923
WBGene00001328	epi-1	K08C7.3	0.000123082	-0.204635	0	negative	58.2097	-11.9117
WBGene00022146		Y71G12B.6	0.000123423	-1.53719	0	negative	13.6866	-21.0389
WBGene00003996	pgp-2	C34G6.4	0.000124824	-0.854532	0	negative	27.6487	-23.6267
WBGene00006063	sto-1	F08C6.4	0.000126332	-0.634289	0	negative	9.85055	-6.2481
WBGene00018073		F35H10.10	0.00012717	-1.06464	0	negative	26.0625	-27.7473
WBGene00007070	ugt-49	AC3.2	0.000130692	-1.45779	0	negative	13.0841	-19.0738
WBGene00001559	gei-1	F45H7.2	0.000131013	-2.29535	0	negative	9.15948	-21.0242
WBGene00022346	pals-17	Y82E9BR.13	0.000131233	-3.68245	0	negative	3.659	-13.4741
WBGene00003891	osm-11	F11C7.5	0.000131534	-0.10143	0	negative	397.917	-40.3607
WBGene00011823		T18D3.6	0.000132226	-1.64798	0	negative	10.9251	-18.0043
WBGene00004237	ptr-23	ZK270.1	0.000132746	-1.81321	0	negative	9.90147	-17.9535
WBGene00019615		K10B4.3	0.000133103	-1.76572	0	negative	9.9156	-17.5082
WBGene00010794	dld-1	LLC1.3	0.0001332	0.280675	0	positive	330.686	92.8153
WBGene00015328		C02B10.3	0.000133997	-1.58663	0	negative	10.0189	-15.8962
WBGene00005008	spr-3	C07A12.5	0.000134175	0.789105	0	positive	44.6101	35.202
WBGene00020950	dlst-1	W02F12.5	0.000134519	-0.329284	0	negative	311.728	-102.647
WBGene00001620	glt-1	C12D12.2	0.000134992	-0.493589	0	negative	75.6843	-37.3569
WBGene00017501	pud-3	F15E11.15	0.000135145	-0.419936	0	negative	6.79913	-2.8552
WBGene00003479	mtm-9	Y39H10A.3	0.000135582	0.499395	0	positive	85.2716	42.5842
WBGene00022683		ZK185.3	0.000137223	-1.77342	0	negative	10.722	-19.0145
WBGene00020030	kel-20	R12E2.1	0.000137665	0.746667	0	positive	64.9327	48.4831
WBGene00022271	cpx-1	Y73E7A.4	0.000138125	-3.30714	0	negative	4.14715	-13.7152
WBGene00002083	inf-1	F57B9.6	0.000138735	0.0823772	0	positive	802.573	66.1137
WBGene00007983		C36E8.4	0.000139392	-3.59433	0	negative	3.42457	-12.3091
WBGene00008920	eef-1G	F17C11.9	0.000139415	0.0276027	0	positive	2260.16	62.3863
WBGene00001597	gld-3	T07F8.3	0.000139692	0.124372	0	positive	411.93	51.2326
WBGene00017900		F28E10.1	0.000139828	-3.19313	0	negative	4.605	-14.7044
WBGene00012732		Y40B1A.1	0.000140558	1.052	0	positive	34.8465	36.6585
WBGene00194861		H04D03.6	0.000143359	2.79987	0	positive	6.15985	17.2468
WBGene00003950	pbs-4	T20F5.2	0.000143562	0.262402	0	positive	207.326	54.4027
WBGene00017347		F10E7.5	0.000143986	0.44456	0	positive	141.777	63.0284
WBGene00007521		C11E4.7	0.000144114	-1.74445	0	negative	7.2764	-12.6933
WBGene00021984		Y59C2A.1	0.000144986	-2.02786	0	negative	9.9406	-20.1581
WBGene00010621	egg-6	K07A12.2	0.000145039	0.132663	0	positive	545.948	72.4272
WBGene00020422		T10F2.2	0.000145772	0.659759	0	positive	69.4726	45.8351
WBGene00018294	atg-18	F41E6.13	0.000146156	0.189671	0	positive	214.832	40.7475
WBGene00020588		T19H12.2	0.000147525	0.121841	0	positive	522.805	63.6993
WBGene00008139		C47D12.5	0.000147807	-2.15536	0	negative	11.6425	-25.0939
WBGene00000785	cpr-5	W07B8.5	0.000147816	0.0699631	0	positive	322.331	22.5513
WBGene00001123	dyf-7	C43C3.3	0.000149355	-4.02374	0	negative	1.1536	-4.64179
WBGene00021430		Y38F2AR.12	0.000151604	-1.64968	0	negative	15.3603	-25.3395
WBGene00020612	arrd-22	T20D4.6	0.000152976	-3.06248	0	negative	4.57159	-14.0004
WBGene00010109		F55C10.5	0.000154386	-2.37288	0	negative	6.54306	-15.5259
WBGene00004890	smp-2	D1037.2	0.000154902	-1.39809	0	negative	16.925	-23.6626
WBGene00009943		F52G2.3	0.000155036	-2.88132	0	negative	6.09545	-17.5629
WBGene00011831		T19B10.2	0.00015719	-0.389574	0	negative	30.7582	-11.9826
WBGene00006708	ubc-13	Y54G2A.31	0.000157796	0.19592	0	positive	191.445	37.508
WBGene00010266	dct-18	F58G1.4	0.000158256	-0.317588	0	negative	89.3452	-28.3749
WBGene00012487		Y18D10A.23	0.000159044	-1.46778	0	negative	15.2084	-22.3226
WBGene00018370		F42H10.6	0.000160084	1.2817	0	positive	19.2493	24.6718
WBGene00019620	fah-1	K10C2.4	0.000162009	-0.487895	0	negative	85.0762	-41.5083
WBGene00009620	fip-5	F41E7.4	0.00016225	-2.50613	0	negative	5.26072	-13.184
WBGene00021339		Y34F4.4	0.00016249	-5.15864	0	negative	0.989003	-5.10191
WBGene00000474	cey-3	M01E11.5	0.000162844	0.0563386	0	positive	806.728	45.4499
WBGene00001431	fkb-6	F31D4.3	0.000163801	0.189054	0	positive	320.668	60.6235
WBGene00001852	hil-1	C30G7.1	0.000164114	-3.00611	0	negative	4.28402	-12.8783
WBGene00017881	asp-13	F28A12.4	0.000164439	-0.116552	0	negative	272.9	-31.8069
WBGene00003925	pas-4	C36B1.4	0.000166553	0.255029	0	positive	204.867	52.247
WBGene00008964	mltn-9	F19H8.4	0.000167643	2.28303	0	positive	6.38233	14.5711
WBGene00012535		Y37A1A.2	0.000168599	-3.37994	0	negative	2.87109	-9.70412
WBGene00016088	clec-266	C25B8.4	0.0001686	-0.260227	0	negative	15.1789	-3.94996
WBGene00012717		Y39E4B.6	0.000168622	-0.883365	0	negative	31.743	-28.0406
WBGene00006619	try-1	ZK546.15	0.000172711	0.500675	0	positive	87.6103	43.8643
WBGene00011289		R102.2	0.000173397	-1.62923	0	negative	9.93309	-16.1833
WBGene00013884		ZC412.3	0.000174297	-1.15146	0	negative	23.5083	-27.0689
WBGene00023421	rde-11	B0564.11	0.00017475	0.586115	0	positive	71.8122	42.0902
WBGene00008510	lipl-7	F01G10.7	0.000175084	-1.19746	0	negative	20.9867	-25.1308
WBGene00018485		F46C8.3	0.000177224	-2.57669	0	negative	4.14083	-10.6696
WBGene00019280		K01A2.5	0.000177385	-1.95653	0	negative	8.07385	-15.7967
WBGene00021043	pck-1	W05G11.6	0.000177389	-0.236203	0	negative	135.075	-31.905
WBGene00018203		F39F10.3	0.000177591	2.70429	0	positive	5.33825	14.4361
WBGene00003164	mdt-6	Y57E12AL.5	0.000177623	0.458692	0	positive	113.355	51.995
WBGene00086551		D2005.7	0.000178299	0.762359	0	positive	57.8519	44.1039
WBGene00013418		Y65A5A.1	0.000178549	-1.94462	0	negative	2.23428	-4.34481
WBGene00020625	mrrf-1	T20F5.3	0.000178837	-1.28374	0	negative	20.3163	-26.0809
WBGene00011737	sqst-1	T12G3.1	0.000179254	-0.52146	0	negative	35.8144	-18.6758
WBGene00021467		Y39G10AR.9	0.000180672	0.460402	0	positive	118.289	54.4606
WBGene00000093	agt-1	Y62E10A.5	0.000183725	1.06993	0	positive	25.4019	27.1783
WBGene00022261	clec-210	Y73C8C.2	0.000183845	-1.93501	0	negative	5.62063	-10.876
WBGene00011804		T16G12.3	0.000184674	-0.972159	0	negative	36.6995	-35.6777
WBGene00007762		C27B7.5	0.000185049	0.610595	0	positive	71.5195	43.6694
WBGene00018894	mff-2	F55F8.6	0.000185063	0.725944	0	positive	45.4007	32.9583
WBGene00009964	fip-6	F53B6.9	0.000185088	-2.85992	0	negative	0.657081	-1.8792
WBGene00017483	lgc-22	F15E6.2	0.000185235	-1.81614	0	negative	10.5115	-19.0904
WBGene00006825	unc-96	F13C5.6	0.000185262	-1.88843	0	negative	10.1106	-19.0932
WBGene00003957	pcp-2	F23B2.12	0.000185422	-1.12611	0	negative	18.2554	-20.5576
WBGene00022251	blos-2	Y73B6BL.30	0.000185437	0.684864	0	positive	53.8975	36.9125
WBGene00000097	aip-1	F58E10.4	0.000185751	0.713222	0	positive	51.8145	36.9552
WBGene00000403	casy-1	B0034.3	0.000186375	-0.994641	0	negative	30.0683	-29.9071
WBGene00007197	prdh-1	B0513.5	0.000186665	-1.36207	0	negative	17.7723	-24.2072
WBGene00013435		Y66D12A.9	0.000186708	0.672158	0	positive	59.2546	39.8284
WBGene00007615	set-31	C15H11.5	0.000187098	0.745976	0	positive	48.346	36.065
WBGene00010130	vha-14	F55H2.2	0.000187968	-0.342006	0	negative	223.935	-76.5869
WBGene00019900	vdac-1	R05G6.7	0.000190035	0.0890157	0	positive	871.2	77.5505
WBGene00007950		C35A5.6	0.000190186	-1.8394	0	negative	8.01275	-14.7386
WBGene00006465	fntb-1	F23B12.6	0.000191321	0.57111	0	positive	104.817	59.8619
WBGene00012139		T28F4.4	0.000191903	-1.68317	0	negative	9.9012	-16.6654
WBGene00006452	heh-1	R148.6	0.000192219	-0.386451	0	negative	91.802	-35.477
WBGene00015561		C07A12.7	0.000192753	-1.25497	0	negative	23.0529	-28.9308
WBGene00001601	glh-4	T12F5.3	0.000193717	0.463445	0	positive	104.733	48.5378
WBGene00011323	mut-15	T01C3.8	0.000194348	0.738955	0	positive	66.3822	49.0535
WBGene00010721		K09E4.3	0.000198093	1.06458	0	positive	33.7573	35.9375
WBGene00001244	elo-6	F41H10.8	0.000199822	-0.115504	0	negative	248.47	-28.6993
WBGene00001948	hlh-1	B0304.1	0.000202114	-3.21558	0	negative	1.66167	-5.34325
WBGene00021863		Y54F10BM.9	0.00020256	1.55645	0	positive	18.9395	29.4783
WBGene00003395	mom-2	F38E1.7	0.000202926	0.214567	0	positive	295.999	63.5115
WBGene00003953	pbs-7	F39H11.5	0.000203711	0.167933	0	positive	277.415	46.5872
WBGene00016146		C26F1.1	0.000205305	-4.70202	0	negative	0.598047	-2.81203
WBGene00019164		H06H21.8	0.000205918	-1.13393	0	negative	21.2081	-24.0485
WBGene00010047		F54D1.6	0.000206096	-1.45165	0	negative	10.9229	-15.8563
WBGene00002144	inx-22	Y47G6A.2	0.000206372	0.438187	0	positive	152.386	66.7735
WBGene00015956		C18B2.5	0.000206718	-0.713377	0	negative	58.4565	-41.7015
WBGene00002225	klp-15	M01E11.6	0.000207191	0.224388	0	positive	187.93	42.1692
WBGene00008387	zhp-2	D1081.9	0.000207655	0.772001	0	positive	54.0382	41.7175
WBGene00022104	acsd-1	Y71D11A.3	0.0002087	-3.28828	0	negative	3.51543	-11.5597
WBGene00023492		T24D3.2	0.00020874	-2.48953	0	negative	4.50337	-11.2113
WBGene00005007	spr-2	C27B7.1	0.000208871	0.315451	0	positive	193.14	60.9264
WBGene00003805	npp-19	R06F6.5	0.000210051	0.459957	0	positive	146.704	67.4774
WBGene00016412	mrps-26	C34E10.11	0.000210379	0.670498	0	positive	72.2895	48.47
WBGene00000426	ced-12	Y106G6E.5	0.000212895	0.527292	0	positive	105.235	55.4894
WBGene00020786		T25B2.2	0.000213939	-2.47581	0	negative	8.2579	-20.445
WBGene00010827		M02B1.2	0.000214661	-2.13075	0	negative	9.10054	-19.391
WBGene00017075	nap-1	D2096.8	0.000215366	0.083393	0	positive	733.302	61.1523
WBGene00012434		Y11D7A.10	0.000216715	0.37753	0	positive	66.663	25.1672
WBGene00012157	adbp-1	VW02B12L.4	0.000218507	0.672285	0	positive	62.1719	41.7973
WBGene00004042	plk-1	C14B9.4	0.000220391	0.222874	0	positive	366.857	81.763
WBGene00023407	cex-1	F56D1.6	0.000221128	-1.89832	0	negative	5.76471	-10.9433
WBGene00016644	abhd-3.2	C44C1.5	0.000221519	-0.940956	0	negative	26.9839	-25.3907
WBGene00011423	ipla-7	T04B2.5	0.000222259	-0.818399	0	negative	30.5867	-25.0321
WBGene00001196	egl-30	M01D7.7	0.000224495	-0.124223	0	negative	152.138	-18.8991
WBGene00020486		T13C5.6	0.000227006	2.20804	0	positive	8.54165	18.8603
WBGene00004462	rpn-6.1	F57B9.10	0.000229246	0.241776	0	positive	266.589	64.4548
WBGene00019692	fubl-4	M01A10.1	0.000230206	0.643751	0	positive	66.1701	42.5971
WBGene00016059	hir-1	C24G6.2	0.000230828	-1.87859	0	negative	9.39532	-17.65
WBGene00022349		Y82E9BR.17	0.000231622	-0.569719	0	negative	6.21677	-3.54181
WBGene00010478		K01G5.5	0.000231762	0.147583	0	positive	344.336	50.8181
WBGene00004458	rpn-1	T22D1.9	0.000232169	0.154152	0	positive	483.703	74.564
WBGene00018523	lact-1	F46H5.8	0.000233128	-2.09863	0	negative	6.80332	-14.2776
WBGene00004744	scp-1	D2013.8	0.000233972	0.536214	0	positive	69.2913	37.155
WBGene00007963	cyp-25A1	C36A4.1	0.00023406	-0.743673	0	negative	21.5319	-16.0127
WBGene00000512	ckb-2	B0285.9	0.000234146	0.66266	0	positive	30.587	20.2688
WBGene00008194		C49C3.4	0.000234293	-0.364603	0	negative	104.784	-38.2043
WBGene00003778	nnt-1	C15H9.1	0.000235796	-2.56249	0	negative	1.74591	-4.47388
WBGene00021555	pid-5	Y45G5AM.2	0.000236522	0.716053	0	positive	68.7275	49.2125
WBGene00003864	oma-1	C09G9.6	0.000236575	0.14622	0	positive	442.307	64.6744
WBGene00010877	lact-4	M05D6.4	0.000236787	-1.97932	0	negative	9.14727	-18.1054
WBGene00003628	nhr-35	C07A12.3	0.000236994	-1.59653	0	negative	11.3606	-18.1375
WBGene00011833		T19B10.5	0.000237759	-1.91898	0	negative	8.88227	-17.0449
WBGene00007261	lron-3	C02C6.3	0.000241529	-1.57232	0	negative	17.5596	-27.6093
WBGene00021128		W10C8.5	0.000243893	-1.00376	0	negative	27.7176	-27.8219
WBGene00006530	tba-4	F44F4.11	0.000244399	-0.594201	0	negative	40.1403	-23.8514
WBGene00013946		ZK228.3	0.000245151	-1.33533	0	negative	17.9257	-23.9367
WBGene00000767	coq-8	C35D10.4	0.000247213	0.387062	0	positive	117.068	45.3126
WBGene00009089	jmjd-3.2	F23D12.5	0.000247453	-2.3336	0	negative	1.9849	-4.63196
WBGene00011924		T22C8.3	0.00024877	-2.07866	0	negative	9.0515	-18.8149
WBGene00017443		F13H8.11	0.000249611	-2.6764	0	negative	4.20533	-11.2551
WBGene00020940		W02D7.4	0.000249629	-2.67395	0	negative	5.13428	-13.7288
WBGene00005020	sqv-2	Y110A2AL.14	0.000249948	0.846732	0	positive	56.7555	48.0567
WBGene00013254	tag-276	Y57A10A.9	0.000250032	1.66585	0	positive	9.73103	16.2104
WBGene00000962	dhc-1	T21E12.4	0.000250229	-0.205831	0	negative	323.379	-66.5614
WBGene00012261	lpr-3	W04G3.8	0.000250326	-1.02003	0	negative	1.04308	-1.06397
WBGene00006861	cal-5	C24H10.5	0.000250822	-0.840975	0	negative	31.0417	-26.1053
WBGene00022389	pde-6	Y95B8A.10	0.000251255	-2.02617	0	negative	9.36091	-18.9668
WBGene00003159	mcm-7	F32D1.10	0.000251914	0.129152	0	positive	589.663	76.1564
WBGene00018400		F43H9.4	0.000253114	-1.15577	0	negative	14.8881	-17.2073
WBGene00019162	eif-1.A	H06H21.3	0.000253766	0.141361	0	positive	395.925	55.9682
WBGene00010418		H27A22.1	0.000254299	0.670163	0	positive	63.0161	42.2311
WBGene00020910	dgtr-1	W01A11.2	0.000257166	0.662207	0	positive	68.1506	45.1298
WBGene00007103	crm-1	B0024.14	0.000259533	-1.64242	0	negative	11.6794	-19.1825
WBGene00012085		T27D12.1	0.000259796	-1.19651	0	negative	17.0745	-20.4298
WBGene00006686	twk-34	K06B4.12	0.000262871	-2.67052	0	negative	5.56263	-14.8551
WBGene00017687	ets-4	F22A3.1	0.000263063	-0.975748	0	negative	17.7162	-17.2866
WBGene00010959	nduo-1	MTCE.11	0.000264875	-0.0586693	0	negative	551.994	-32.3851
WBGene00017436		F13H8.3	0.000266659	-0.681361	0	negative	34.7581	-23.6828
WBGene00015551		C06G3.5	0.000266785	-0.825272	0	negative	36.3998	-30.0398
WBGene00017640		F20D6.11	0.000267458	-1.46446	0	negative	15.8772	-23.2515
WBGene00004917	snr-4	C52E4.3	0.000267604	0.255684	0	positive	217.71	55.6649
WBGene00012444		Y15E3A.5	0.000269804	-2.37738	0	negative	4.88466	-11.6127
WBGene00004148	pqn-65	T13H2.4	0.000273033	0.243726	0	positive	135.838	33.1073
WBGene00077732	szy-4	C30B5.1	0.000274695	0.229157	0	positive	249.378	57.1467
WBGene00007573		C14B1.2	0.000278553	0.362236	0	positive	134.473	48.7108
WBGene00044079	tag-241	C34E11.3	0.00027919	-2.47206	0	negative	5.5567	-13.7365
WBGene00044081		D1086.11	0.000279694	-0.265778	0	negative	134.538	-35.7573
WBGene00000072	add-1	F39C12.2	0.000284224	-3.1205	0	negative	5.17304	-16.1424
WBGene00000867	cyb-2.2	H31G24.4	0.000286859	0.184122	0	positive	346.273	63.7563
WBGene00020674		T22B7.7	0.000287605	-0.142856	0	negative	32.1909	-4.59865
WBGene00018407		F44B9.2	0.000293934	-2.2523	0	negative	7.27748	-16.391
WBGene00019808		R01B10.6	0.000295473	0.834607	0	positive	45.5989	38.0572
WBGene00007947		C35A5.3	0.000295787	-0.471941	0	negative	38.1154	-17.9882
WBGene00013540	cest-12	Y75B8A.3	0.000297006	-2.48041	0	negative	5.12263	-12.7062
WBGene00019197		H14A12.5	0.000297514	-1.71929	0	negative	7.10702	-12.2191
WBGene00044082		D1086.12	0.000298401	-1.63124	0	negative	13.3863	-21.8363
WBGene00020155		T02B11.3	0.000299929	-0.630739	0	negative	51.9096	-32.7414
WBGene00007236		C01G10.9	0.00030003	-2.04967	0	negative	7.68556	-15.7529
WBGene00000929	dao-3	K07E3.3	0.000302432	-0.63804	0	negative	37.2253	-23.7512
WBGene00022276	nlp-40	Y74C9A.2	0.000302537	-0.280691	0	negative	134.973	-37.8858
WBGene00003661	nhr-71	K11E4.5	0.000304557	0.921372	0	positive	41.044	37.8168
WBGene00006692	twk-42	W06D12.2	0.000304757	-3.17165	0	negative	5.34576	-16.9549
WBGene00000036	ace-2	Y44E3A.2	0.000307109	-2.96895	0	negative	4.54482	-13.4933
WBGene00018585		F48A11.4	0.000309643	0.540609	0	positive	104.747	56.6271
WBGene00011350	perm-1	T01H3.4	0.000312028	0.294702	0	positive	177.788	52.3944
WBGene00009482		F36G3.1	0.000312929	-1.53675	0	negative	15.0182	-23.0792
WBGene00022042	icd-2	Y65B4BR.5	0.000313053	0.0605099	0	positive	731.767	44.2792
WBGene00019373		K04A8.1	0.000314332	-2.04681	0	negative	7.99254	-16.3592
WBGene00000453	ceh-32	W05E10.3	0.000315168	-1.08694	0	negative	5.67429	-6.16759
WBGene00077543		F27D4.8	0.000318844	1.39319	0	positive	16.7603	23.3503
WBGene00011324	hrde-2	T01C3.9	0.000322995	0.500933	0	positive	104.45	52.3224
WBGene00002992	lin-3	F36H1.4	0.000323756	0.608362	0	positive	68.8181	41.8663
WBGene00013734		Y111B2A.10	0.000325132	0.782316	0	positive	65.6871	51.3881
WBGene00016197	pxl-1	C28H8.6	0.000327519	-0.715125	0	negative	30.8054	-22.0297
WBGene00020068	cra-1	R13F6.10	0.00032767	0.339012	0	positive	133.496	45.257
WBGene00006779	unc-43	K11E8.1	0.000327824	-0.438412	0	negative	63.253	-27.7309
WBGene00007630	har-1	C16C10.11	0.000328209	0.305989	0	positive	148.574	45.462
WBGene00013575	acs-5	Y76A2B.3	0.000328228	-0.579482	0	negative	58.804	-34.0759
WBGene00003926	pas-5	F25H2.9	0.00032852	0.174909	0	positive	309.061	54.0576
WBGene00017892		F28B4.3	0.000328717	-0.20837	0	negative	178.587	-37.2122
WBGene00001432	fkb-7	B0511.1	0.00033039	-2.16015	0	negative	2.72508	-5.88659
WBGene00013238	trap-4	Y56A3A.21	0.000330846	0.0820925	0	positive	445.503	36.5725
WBGene00013275	btb-14	Y57A10B.3	0.000333775	-1.34018	0	negative	17.6271	-23.6235
WBGene00015497	nhr-76	C05G6.1	0.000333852	-1.91435	0	negative	8.90577	-17.0488
WBGene00044535		K11D12.13	0.000334011	-0.347506	0	negative	79.1326	-27.499
WBGene00003762	nlp-24	F35B12.7	0.000334638	-0.952796	0	negative	16.4403	-15.6642
WBGene00013880	mppb-1	ZC410.2	0.000336918	0.714234	0	positive	60.8922	43.4913
WBGene00007744		C26D10.3	0.000337524	-2.53221	0	negative	6.43354	-16.2911
WBGene00000885	cyn-9	T27D1.1	0.000338917	0.63203	0	positive	66.3049	41.9067
WBGene00020504	svh-2	T14E8.1	0.000339614	-1.06286	0	negative	24.9756	-26.5455
WBGene00015698	kca-1	C10H11.10	0.00034004	0.364292	0	positive	152.109	55.4122
WBGene00011253		R11H6.5	0.000341518	0.481709	0	positive	123.832	59.651
WBGene00003951	pbs-5	K05C4.1	0.000341709	0.204356	0	positive	251.044	51.3025
WBGene00021448		Y39D8A.1	0.000343473	-2.62207	0	negative	5.33373	-13.9854
WBGene00003241	mig-5	T05C12.6	0.000343747	0.422589	0	positive	164.616	69.5651
WBGene00000121	aly-2	F23B2.6	0.000344274	0.146254	0	positive	375.501	54.9185
WBGene00009385	sas-5	F35B12.5	0.000344463	0.338666	0	positive	170.117	57.6128
WBGene00012293		W06A7.4	0.000344565	-1.51886	0	negative	10.0221	-15.2222
WBGene00001235	elb-1	Y41C4A.10	0.00034576	0.660421	0	positive	57.3853	37.8985
WBGene00010842	ymel-1	M03C11.5	0.000348345	0.434187	0	positive	105.811	45.9419
WBGene00012007		T25B9.1	0.000350733	-2.07331	0	negative	7.62693	-15.813
WBGene00001816	haf-6	Y48G8AL.11	0.000352907	-1.05118	0	negative	32.9903	-34.6787
WBGene00004015	phb-2	T24H7.1	0.000353682	0.174968	0	positive	272.957	47.7588
WBGene00000882	cyn-6	F42G9.2	0.000358773	-0.882098	0	negative	15.3488	-13.5391
WBGene00010084		F55B11.2	0.00036281	-0.344622	0	negative	85.6458	-29.5154
WBGene00014092		ZK822.5	0.000363632	-0.999053	0	negative	27.2936	-27.2677
WBGene00006431	tag-52	C02F12.4	0.0003647	0.800561	0	positive	41.1471	32.9407
WBGene00008371		D1054.3	0.000364769	0.344118	0	positive	119.358	41.0734
WBGene00001366	exc-5	C33D9.1	0.00036499	-2.42156	0	negative	6.48357	-15.7003
WBGene00000112	alh-6	F56D12.1	0.000365988	-0.625762	0	negative	61.149	-38.2647
WBGene00017885	dip-2	F28B3.4	0.000369875	-0.513532	0	negative	80.5248	-41.352
WBGene00019543	cif-1	K08F11.3	0.000370482	0.294036	0	positive	242.556	71.3203
WBGene00011038		R05H5.3	0.000372506	0.120726	0	positive	405.013	48.8957
WBGene00008458		E02H1.6	0.00037298	0.936648	0	positive	30.3075	28.3875
WBGene00016894		C53B7.3	0.000372996	-0.632976	0	negative	39.8842	-25.2457
WBGene00008398		D2005.3	0.000373532	0.688332	0	positive	52.0501	35.8277
WBGene00004924	snt-4	T23H2.2	0.000374373	-1.47985	0	negative	15.1714	-22.4514
WBGene00017133		EEED8.2	0.0003744	-1.78461	0	negative	2.52022	-4.49761
WBGene00022022		Y61A9LA.11	0.00037535	0.973293	0	positive	23.3556	22.7319
WBGene00007877	nfki-1	C33A11.1	0.000376114	-1.39424	0	negative	16.0693	-22.4045
WBGene00003169	mec-5	E03G2.3	0.000378909	-1.26319	0	negative	16.9963	-21.4696
WBGene00000915	hsp-90	C47E8.5	0.000379111	0.013391	0	positive	2744.98	36.758
WBGene00016989	mrpl-48	CD4.3	0.000381491	0.96426	0	positive	38.5179	37.1412
WBGene00007756		C27A7.5	0.000384836	-0.818259	0	negative	39.0015	-31.9134
WBGene00016013	ugt-66	C23G10.6	0.000386303	-4.36268	0	negative	0.871138	-3.8005
WBGene00004332	rec-1	Y18H1A.7	0.00038728	0.869943	0	positive	45.211	39.331
WBGene00003799	npp-13	Y37E3.15	0.000392871	0.433619	0	positive	146.438	63.4981
WBGene00017613		F20A1.1	0.000397001	-0.819827	0	negative	29.3901	-24.0948
WBGene00021056		W06B4.1	0.000397829	0.334212	0	positive	216.466	72.3456
WBGene00010985		R03A10.5	0.000397879	-1.89209	0	negative	11.2109	-21.2119
WBGene00013239		Y56A3A.22	0.000398913	0.457866	0	positive	91.3309	41.8173
WBGene00009361		F33E2.5	0.000401029	-0.878176	0	negative	9.67446	-8.49588
WBGene00011282		R74.8	0.000401815	0.242125	0	positive	274.206	66.3922
WBGene00022466		Y119C1A.1	0.000403702	0.592641	0	positive	84.1785	49.8877
WBGene00004506	rpt-6	Y49E10.1	0.000405325	0.252976	0	positive	200.742	50.783
WBGene00021051		W05H9.4	0.000406779	0.881106	0	positive	37.4586	33.005
WBGene00045399		Y47G6A.33	0.00040702	-0.467826	0	negative	39.3828	-18.4243
WBGene00008284		C53D6.7	0.000408409	-2.45714	0	negative	8.53232	-20.9651
WBGene00002008	hsp-4	F43E2.8	0.000413052	0.0860504	0	positive	643.098	55.3388
WBGene00019060	acox-3	F58F9.7	0.000414853	-0.941156	0	negative	15.2051	-14.3104
WBGene00010221		F57G12.1	0.000415071	-0.371923	0	negative	42.6054	-15.8459
WBGene00010036	cpar-1	F54C8.2	0.000415308	0.527951	0	positive	91.7007	48.4135
WBGene00002226	klp-16	C41G7.2	0.000416808	0.262151	0	positive	171.732	45.0197
WBGene00001113	dur-1	F25H8.5	0.000422278	-1.96677	0	negative	6.92139	-13.6128
WBGene00018606		F48E3.6	0.000425865	-1.57952	0	negative	2.40928	-3.8055
WBGene00008576		F08G2.4	0.000426754	-1.52704	0	negative	12.082	-18.4497
WBGene00022279	sesn-1	Y74C9A.5	0.000427304	-0.804187	0	negative	32.768	-26.3516
WBGene00018024		F35A5.1	0.000428155	-1.12303	0	negative	19.9282	-22.3799
WBGene00020507	vha-15	T14F9.1	0.000428877	-0.379368	0	negative	136.439	-51.7607
WBGene00015968		C18C4.7	0.000430533	-0.923597	0	negative	25.8946	-23.9162
WBGene00004310	ras-1	C44C11.1	0.000432217	-1.70317	0	negative	11.2007	-19.0767
WBGene00014097		ZK829.9	0.000433551	0.321334	0	positive	133.67	42.9529
WBGene00006915	vha-6	VW02B12L.1	0.000435945	-0.240707	0	negative	146.299	-35.2153
WBGene00044049	sfxn-5	C41C4.10	0.000436172	-2.37905	0	negative	7.77058	-18.4866
WBGene00017124		E04F6.4	0.000437416	-2.19915	0	negative	7.18153	-15.7932
WBGene00021464	ugt-31	Y39G10AR.6	0.000439381	-2.87059	0	negative	3.33232	-9.56571
WBGene00018418		F44E2.4	0.000442379	-2.06887	0	negative	1.07735	-2.2289
WBGene00001105	dsl-3	Y41D4B.10	0.000442935	-2.13211	0	negative	0.946499	-2.01804
WBGene00004152	pqn-70	T19B10.4	0.000443939	0.199347	0	positive	219.225	43.702
WBGene00004825	skr-19	R12H7.3	0.000446463	-1.22635	0	negative	14.2584	-17.4858
WBGene00006956	wrt-10	ZK1290.8	0.000446806	-0.920563	0	negative	1.07081	-0.985746
WBGene00000449	ceh-27	F46F3.1	0.000448227	-2.44392	0	negative	1.35026	-3.29992
WBGene00004219	ptr-4	C45B2.7	0.00044837	-3.24107	0	negative	0.336146	-1.08947
WBGene00020160	igcm-3	T02C5.3	0.000452675	-0.297426	0	negative	24.1885	-7.19428
WBGene00021942	madf-1	Y55F3BR.5	0.000452874	-2.87842	0	negative	4.80777	-13.8388
WBGene00017688	ttr-35	F22A3.2	0.000455328	-1.37257	0	negative	17.64	-24.2122
WBGene00020771		T24E12.1	0.000457928	1.62122	0	positive	13.2408	21.4663
WBGene00020379		T09B4.5	0.00046187	-0.137303	0	negative	47.0013	-6.45341
WBGene00004883	smg-5	W02D3.8	0.00046286	0.963247	0	positive	37.9767	36.5809
WBGene00007235	ahsa-1	C01G10.8	0.000462941	0.121632	0	positive	267.142	32.4929
WBGene00021048		W05H9.1	0.000464046	-0.319755	0	negative	58.6382	-18.7499
WBGene00007422	ugt-17	C08B6.1	0.000465427	-0.832904	0	negative	23.267	-19.3792
WBGene00016781		C49G7.3	0.00046783	-0.375919	0	negative	69.4826	-26.1198
WBGene00011936	pgrn-1	T22H2.6	0.000469906	-1.03054	0	negative	23.642	-24.3641
WBGene00019565	cyp-35A3	K09D9.2	0.0004709	-2.91277	0	negative	1.4871	-4.33157
WBGene00000503	cht-1	C04F6.3	0.000471179	-0.12458	0	negative	33.2363	-4.14057
WBGene00077701	poml-3	E01A2.10	0.000471429	-2.50093	0	negative	5.4658	-13.6696
WBGene00014150		ZK909.6	0.000473258	-2.09297	0	negative	6.95969	-14.5664
WBGene00044483		H06H21.11	0.000473387	0.711325	0	positive	62.0703	44.1522
WBGene00008385		D1081.7	0.00047397	0.109031	0	positive	479.771	52.3101
WBGene00008968	elli-1	F20C5.3	0.000474768	0.43075	0	positive	98.2446	42.3189
WBGene00007797		C29A12.1	0.000476892	0.555483	0	positive	93.2484	51.7979
WBGene00007753		C27A7.1	0.000482877	-1.24088	0	negative	14.1775	-17.5926
WBGene00013181		Y53H1B.2	0.000483056	-0.373968	0	negative	68.8214	-25.737
WBGene00004013	pha-4	F38A6.1	0.00048352	-0.892518	0	negative	6.12017	-5.46236
WBGene00007099	trx-2	B0024.9	0.000483882	0.580048	0	positive	41.2216	23.9105
WBGene00011740	mrpl-51	T12G3.5	0.000484317	0.567332	0	positive	72.0526	40.8778
WBGene00001208	egl-44	F28B12.2	0.000484753	-1.11336	0	negative	16.181	-18.0152
WBGene00018538	marg-1	F47B7.7	0.000486458	-2.47195	0	negative	5.63186	-13.9217
WBGene00000545	clp-4	Y39A3CL.5	0.00048877	-1.31579	0	negative	21.84	-28.7368
WBGene00006760	unc-23	H14N18.1	0.000489773	-1.32779	0	negative	14.1662	-18.8099
WBGene00011977		T24B8.3	0.000491609	-0.186419	0	negative	33.8068	-6.30222
WBGene00009330		F32D8.5	0.00049163	1.01078	0	positive	27.5239	27.8205
WBGene00021743		Y50D4B.4	0.000494202	-0.438888	0	negative	59.7532	-26.225
WBGene00016768	cyp-33E1	C49C8.4	0.000494712	-2.7124	0	negative	4.5371	-12.3064
WBGene00000776	cpl-1	T03E6.7	0.00049501	-0.0231954	0	negative	1611.91	-37.3888
WBGene00014108		ZK856.7	0.000496207	-0.657025	0	negative	41.6864	-27.389
WBGene00000377	cct-1	T05C12.7	0.000497651	0.118917	0	positive	430.076	51.1432
WBGene00006321	sup-12	T22B2.4	0.000497905	-1.89038	0	negative	7.0679	-13.361
WBGene00013792	rad-54.B	Y116A8C.13	0.000498412	0.849438	0	positive	43.1017	36.6122
WBGene00015298		C01F1.3	0.000501196	-1.34316	0	negative	8.97129	-12.0498
WBGene00007650	ugt-23	C17G1.3	0.000503172	-0.954041	0	negative	23.7638	-22.6716
WBGene00010628	ceeh-2	K07C5.5	0.000505475	-2.05127	0	negative	7.09466	-14.5531
WBGene00020143		T01C8.2	0.000505698	-1.98931	0	negative	7.68896	-15.2957
WBGene00004242	puf-6	F18A11.1	0.000510517	0.319605	0	positive	185.985	59.4417
WBGene00008780	hxk-1	F14B4.2	0.000510694	0.148928	0	positive	452.602	67.4053
WBGene00021088		W08E12.7	0.000515524	0.0598016	0	positive	939.734	56.1976
WBGene00008377		D1054.10	0.000517651	-0.0721424	0	negative	518.574	-37.4112
WBGene00001828	hch-1	F40E10.1	0.000518276	-0.705877	0	negative	1.02911	-0.726423
WBGene00003635	nhr-45	F16H11.5	0.000518318	-1.87152	0	negative	8.42964	-15.7763
WBGene00021888	manf-1	Y54G2A.23	0.000518681	0.307524	0	positive	151.139	46.4787
WBGene00012420		Y7A9D.1	0.000523886	-1.80403	0	negative	2.83174	-5.10855
WBGene00020812	acdh-7	T25G12.5	0.000524251	0.363131	0	positive	99.2208	36.0301
WBGene00008378	ule-3	D1054.11	0.000524513	-0.0501884	0	negative	1178.35	-59.1397
WBGene00017755	zip-8	F23F12.9	0.000527602	-0.463566	0	negative	4.75685	-2.20511
WBGene00012095	pssy-2	T27E9.5	0.000528004	0.555697	0	positive	73.1997	40.6769
WBGene00019987		R09F10.3	0.000534173	1.14083	0	positive	26.2553	29.9529
WBGene00018353	fbxa-182	F42G2.4	0.000536966	-2.59517	0	negative	3.83212	-9.94501
WBGene00021928		Y55F3AM.11	0.000537276	-0.687539	0	negative	8.92109	-6.1336
WBGene00009562	flp-22	F39H2.1	0.000537857	-1.51749	0	negative	12.9373	-19.6321
WBGene00013477		Y69E1A.5	0.000539935	-1.286	0	negative	16.8202	-21.6308
WBGene00017498	pud-4	F15E11.12	0.000540404	-0.860634	0	negative	2.17291	-1.87008
WBGene00020317	pdf-1	T07E3.6	0.000540667	-1.10612	0	negative	18.5318	-20.4983
WBGene00014139	nstp-5	ZK896.9	0.0005422	0.656166	0	positive	89.7808	58.9111
WBGene00000799	crn-6	K04H4.6	0.000542831	-1.61308	0	negative	9.47547	-15.2847
WBGene00018901	slc-25A18.2	F55G1.5	0.0005433	1.2684	0	positive	18.1265	22.9916
WBGene00044989		Y37A1B.17	0.000546029	-0.855964	0	negative	42.5287	-36.403
WBGene00010085		F55B11.3	0.000546385	-0.302521	0	negative	93.9056	-28.4084
WBGene00021377		Y37E11B.5	0.00054741	1.02932	0	positive	30.8751	31.7802
WBGene00007577	nrde-1	C14B1.6	0.000547424	0.697052	0	positive	62.2237	43.3731
WBGene00020366	acdh-10	T08G2.3	0.000549948	0.370075	0	positive	96.6721	35.7759
WBGene00019189		H11L12.1	0.000550007	-1.78069	0	negative	4.75916	-8.47459
WBGene00007516	gpx-5	C11E4.1	0.000554453	-0.74152	0	negative	38.9089	-28.8517
WBGene00016638	perm-4	C44B12.5	0.000554701	-0.0250568	0	negative	1992.79	-49.9328
WBGene00007622		C16C10.1	0.000559959	0.595892	0	positive	74.3863	44.3262
WBGene00006959	xbp-1	R74.3	0.000560507	0.0853452	0	positive	323.086	27.5738
WBGene00008564	acox-1.1	F08A8.1	0.000560725	-0.822393	0	negative	31.6212	-26.005
WBGene00007402	ugt-60	C07A9.6	0.000564036	-1.72488	0	negative	10.0725	-17.374
WBGene00000178	aqp-10	ZK1321.3	0.000564269	-1.00543	0	negative	28.6771	-28.8328
WBGene00001841	hen-1	C36B7.7	0.000565698	-4.40169	0	negative	1.35564	-5.96712
WBGene00020509	hex-1	T14F9.3	0.000566591	-0.453988	0	negative	53.0885	-24.1016
WBGene00009831		F47G9.4	0.000567299	-2.52858	0	negative	4.81565	-12.1768
WBGene00011680		T10B10.3	0.000567681	-0.31328	0	negative	61.4908	-19.2638
WBGene00019915	tbc-10	R06B10.5	0.000568549	1.23339	0	positive	22.1349	27.3009
WBGene00006536	tbb-1	K01G5.7	0.000569699	0.053218	0	positive	983.073	52.3172
WBGene00020480	ssup-72	T13C2.4	0.000571741	0.663136	0	positive	53.3707	35.392
WBGene00009668	cfim-1	F43G9.5	0.000577903	0.504962	0	positive	110.242	55.6682
WBGene00009158		F26E4.3	0.000579954	-1.80766	0	negative	8.61447	-15.572
WBGene00006763	unc-26	JC8.10	0.000580301	0.799971	0	positive	56.6319	45.3038
WBGene00000965	dhs-1	C01G8.3	0.000580491	0.557287	0	positive	81.3472	45.3337
WBGene00015794		C15F1.1	0.000585858	-2.44229	0	negative	6.06662	-14.8165
WBGene00016627		C44B7.5	0.000586513	-0.118766	0	negative	348.095	-41.3417
WBGene00018636	oef-1	F49E8.2	0.000587428	1.06097	0	positive	34.3196	36.412
WBGene00003516	nab-1	C43E11.6	0.000590341	-0.977841	0	negative	7.74432	-7.57271
WBGene00003659	nhr-69	T23H4.2	0.000590991	-1.73594	0	negative	11.8156	-20.5111
WBGene00001774	gst-26	Y53F4B.29	0.000594508	-1.15704	0	negative	21.0898	-24.4017
WBGene00019129		F59G1.8	0.000595008	0.959441	0	positive	35.9895	34.5299
WBGene00006331	sup-26	R10E4.2	0.000595179	-0.117114	0	negative	79.8821	-9.35535
WBGene00016501		C37C3.9	0.000595822	0.2226	0	positive	204.712	45.5689
WBGene00020038		R12E2.13	0.000595868	0.433835	0	positive	95.6709	41.5053
WBGene00016624	hrpl-1	C44B7.2	0.000597785	0.832851	0	positive	47.6676	39.7
WBGene00012891	sorb-1	Y45F10D.13	0.000598276	-3.16444	0	negative	3.97642	-12.5832
WBGene00023417	swm-1	C25E10.9	0.000598297	-1.8347	0	negative	7.76967	-14.2551
WBGene00019855		R03H10.2	0.000602486	-2.20261	0	negative	0.786958	-1.73336
WBGene00019719		M01H9.3	0.000602616	0.281968	0	positive	188.933	53.2729
WBGene00003524	nas-5	T23H4.3	0.000607172	-3.31071	0	negative	1.99414	-6.60202
WBGene00003765	nlp-27	B0213.2	0.000608298	-0.443879	0	negative	35.7991	-15.8905
WBGene00006817	unc-85	F10G7.3	0.000609553	0.366031	0	positive	120.965	44.2769
WBGene00004370	rig-3	C53B7.1	0.000609669	1.87598	0	positive	8.52463	15.9921
WBGene00021736	wrb-1	Y50D4A.2	0.000614665	0.78771	0	positive	62.5798	49.2948
WBGene00000425	ced-11	ZK512.3	0.000615819	-2.57216	0	negative	2.21527	-5.69801
WBGene00015469		C05D2.8	0.000616313	-0.595541	0	negative	39.9437	-23.7881
WBGene00000889	cyn-13	Y116A8C.34	0.000619602	0.557866	0	positive	94.2856	52.5987
WBGene00000792	crb-1	F11C7.4	0.000620644	-1.71595	0	negative	5.4116	-9.28603
WBGene00017814		F26A10.2	0.000621619	-3.23921	0	negative	1.58682	-5.14006
WBGene00011755		T13H5.1	0.00062796	-2.46155	0	negative	6.70514	-16.5051
WBGene00016608	cogc-5	C43E11.11	0.000633953	0.322566	0	positive	121.04	39.0435
WBGene00006537	tbb-2	C36E8.5	0.000636527	0.0335814	0	positive	1954.62	65.6389
WBGene00004501	rpt-1	C52E4.4	0.000643906	0.186072	0	positive	371.385	69.1045
WBGene00043051		C29E4.13	0.000644464	0.541426	0	positive	46.8141	25.3464
WBGene00001489	frm-2	T04C9.6	0.000644946	-0.830923	0	negative	20.6104	-17.1257
WBGene00004344	rgs-1	C05B5.7	0.000646038	-2.46082	0	negative	4.93061	-12.1334
WBGene00008979	slc-25A18.1	F20D1.9	0.000652123	-1.07165	0	negative	29.4873	-31.6
WBGene00006503	snx-3	W06D4.5	0.000653639	0.552708	0	positive	75.3189	41.6294
WBGene00019247	syp-4	H27M09.3	0.000653665	0.395122	0	positive	168.81	66.7006
WBGene00016250	hsp-110	C30C11.4	0.000654985	0.119283	0	positive	535.947	63.9295
WBGene00044066	fbxb-66	Y40B1B.3	0.000658975	-2.42418	0	negative	1.78605	-4.3297
WBGene00009657		F43G6.4	0.000659787	-2.62525	0	negative	4.07308	-10.6929
WBGene00019232	ugt-13	H23N18.1	0.000660031	-1.9387	0	negative	6.4132	-12.4332
WBGene00011393		T03D8.6	0.000660345	-1.52005	0	negative	12.1378	-18.4501
WBGene00011153		R09A8.2	0.000662888	0.924504	0	positive	33.819	31.2658
WBGene00008499	cyp-37A1	F01D5.9	0.000668509	-1.54462	0	negative	10.4125	-16.0833
WBGene00007336		C05C12.4	0.000668866	-1.06385	0	negative	14.0607	-14.9585
WBGene00013962		ZK287.1	0.000669948	-3.71614	0	negative	0.943276	-3.50534
WBGene00016602	mus-81	C43E11.2	0.000670098	0.727022	0	positive	66.3278	48.2218
WBGene00013144	pno-1	Y53C12B.2	0.000671451	0.345517	0	positive	143.791	49.6823
WBGene00012037		T26E3.4	0.000671541	0.742452	0	positive	51.3081	38.0938
WBGene00008681	scrm-4	F11A6.2	0.000672011	-2.21377	0	negative	4.51455	-9.99416
WBGene00009952	acaa-2	F53A2.7	0.00067609	-0.211836	0	negative	261.037	-55.297
WBGene00009888		F49E2.5	0.000676409	-0.183975	0	negative	116.971	-21.5198
WBGene00019357	cpg-8	K03B4.7	0.00067819	0.267715	0	positive	144.537	38.6948
WBGene00004491	rps-22	F53A3.3	0.000678218	0.057166	0	positive	736.781	42.1188
WBGene00001334	ero-1	Y105E8B.8	0.000686065	-0.435824	0	negative	114.584	-49.9384
WBGene00001372	exo-3	R09B3.1	0.000686299	0.41664	0	positive	105.503	43.9567
WBGene00001477	fmo-2	K08C7.5	0.00068718	-4.51438	0	negative	0.219022	-0.988747
WBGene00001820	ham-1	F53B2.6	0.000688483	-0.859018	0	negative	5.84491	-5.02089
WBGene00018052		F35F10.1	0.000689455	-2.0442	0	negative	6.2455	-12.767
WBGene00000981	dhs-18	C45B11.3	0.000690955	-1.61261	0	negative	12.3849	-19.972
WBGene00009653		F43D9.1	0.000695447	-1.49758	0	negative	0.918288	-1.37521
WBGene00018071		F35H10.6	0.00069863	0.940903	0	positive	34.3626	32.3318
WBGene00003920	par-5	M117.2	0.000699187	0.0580344	0	positive	1038.81	60.2865
WBGene00018070		F35H10.5	0.000701078	1.31125	0	positive	15.292	20.0516
WBGene00008172		C48B4.9	0.000710211	0.760329	0	positive	53.9086	40.9883
WBGene00009374		F34D10.4	0.000713549	0.336583	0	positive	104.777	35.266
WBGene00013672	catp-1	Y105E8A.12	0.0007141	-2.1541	0	negative	9.68717	-20.8671
WBGene00004891	smr-1	Y71D11A.2	0.000716647	0.414177	0	positive	114.359	47.3649
WBGene00021692		Y48G8AL.15	0.000718744	2.19581	0	positive	8.85619	19.4465
WBGene00003528	nas-9	C37H5.9	0.000736006	-2.16481	0	negative	6.90634	-14.9509
WBGene00001392	far-8	K02F3.3	0.000736654	-0.419798	0	negative	74.7069	-31.3618
WBGene00003417	mrt-2	Y41C4A.14	0.000737966	1.07645	0	positive	30.2757	32.5901
WBGene00013135	rga-2	Y53C10A.4	0.000738421	-1.94697	0	negative	4.00358	-7.79487
WBGene00020022	gldc-1	R12C12.1	0.000741453	-0.346321	0	negative	94.1046	-32.5904
WBGene00011283	ttbk-7	R90.1	0.00074197	-1.04691	0	negative	17.5471	-18.3702
WBGene00021595		Y46E12BL.2	0.000746112	0.664404	0	positive	60.7135	40.3384
WBGene00018518		F46H5.2	0.000747513	0.903238	0	positive	42.2008	38.1173
WBGene00000405	cdk-1	T05G5.3	0.000747759	0.139857	0	positive	326.377	45.6462
WBGene00015308	ddi-1	C01G5.6	0.000747802	0.307401	0	positive	156.637	48.1502
WBGene00017988	fipp-1	F32D1.9	0.000749582	0.315598	0	positive	161.675	51.0244
WBGene00013225		Y56A3A.2	0.000750374	-0.449088	0	negative	74.4018	-33.413
WBGene00012186	mlt-11	W01F3.3	0.000752197	-0.367301	0	negative	2.48545	-0.912908
WBGene00014091		ZK822.4	0.000759765	-0.759556	0	negative	36.5601	-27.7695
WBGene00015781		C14F11.6	0.000761876	-4.21625	0	negative	0.275795	-1.16282
WBGene00004954	spd-3	H34C03.1	0.000763492	1.08871	0	positive	22.9704	25.0081
WBGene00007492		C09G9.1	0.000770921	0.442385	0	positive	160.857	71.1605
WBGene00000301	cav-1	T13F2.8	0.000774104	-0.0747493	0	negative	81.7206	-6.10856
WBGene00003681	nhr-91	Y15E3A.1	0.000774864	-3.45023	0	negative	1.58939	-5.48376
WBGene00019215		H20E11.3	0.000775542	-3.36435	0	negative	2.95136	-9.9294
WBGene00013188	smg-9	Y54E2A.2	0.000778304	1.13949	0	positive	22.7446	25.9173
WBGene00010465		K01D12.6	0.000780081	0.41556	0	positive	100.656	41.8285
WBGene00008260		C52G5.2	0.000780345	-2.52551	0	negative	5.26711	-13.3022
WBGene00012018		T25C12.3	0.000782087	-0.141895	0	negative	231.778	-32.8881
WBGene00004374	rme-2	T11F8.3	0.000785995	0.033186	0	positive	1079.32	35.8185
WBGene00015329		C02B10.4	0.000786269	0.323941	0	positive	190.676	61.7677
WBGene00000460	ceh-39	T26C11.7	0.000788131	0.5649	0	positive	50.5034	28.5294
WBGene00017431	cest-33	F13H6.3	0.000788131	-1.10245	0	negative	22.5267	-24.8347
WBGene00001050	dom-3	F54C1.2	0.000791243	0.794635	0	positive	47.6876	37.8942
WBGene00012920	alkb-7	Y46G5A.35	0.000792652	1.61849	0	positive	16.576	26.8281
WBGene00017772	clec-1	F25B4.9	0.00079288	-0.205151	0	negative	154.941	-31.7863
WBGene00022244		Y73B6BL.23	0.000795435	0.349343	0	positive	110.55	38.6198
WBGene00021842		Y54E10BR.3	0.000797782	0.677263	0	positive	79.1473	53.6036
WBGene00011556	vglu-3	T07A5.3	0.000803248	-2.37859	0	negative	6.00446	-14.2822
WBGene00006376	syp-2	C24G6.1	0.000803366	0.417029	0	positive	82.4859	34.399
WBGene00008380	prp-38	D1054.14	0.000811486	0.423207	0	positive	121.651	51.4835
WBGene00003510	mxl-2	F40G9.11	0.000813517	0.513478	0	positive	75.2646	38.6467
WBGene00000421	ced-7	C48B4.4	0.000814602	-0.217872	0	negative	167.669	-36.5304
WBGene00020383	tin-44	T09B4.9	0.000823471	0.425184	0	positive	92.727	39.426
WBGene00006798	unc-64	F56A8.7	0.000827105	-1.31773	0	negative	15.1679	-19.9872
WBGene00022492	dss-1	Y119D3B.15	0.000830052	0.218419	0	positive	168.097	36.7157
WBGene00001042	dnj-24	W03A5.7	0.000831656	-1.83758	0	negative	10.2883	-18.9055
WBGene00007536	daf-36	C12D8.5	0.000832821	-1.38696	0	negative	15.0908	-20.9303
WBGene00002232	kpc-1	F11A6.1	0.000834782	-1.13783	0	negative	11.9781	-13.6291
WBGene00004005	pgp-11	DH11.3	0.000837385	-2.12509	0	negative	7.16901	-15.2348
WBGene00000941	ddp-1	Y39A3CR.4	0.00084802	0.504397	0	positive	51.6994	26.077
WBGene00001157	ech-8	F01G10.2	0.000853331	-1.49483	0	negative	9.61805	-14.3774
WBGene00017726		F22H10.2	0.000853836	1.63077	0	positive	7.44248	12.137
WBGene00000498	chk-1	Y39H10A.7	0.000854322	0.358889	0	positive	115.88	41.588
WBGene00000993	dhs-30	T25G12.7	0.000861769	-1.06098	0	negative	27.6912	-29.38
WBGene00000103	akt-2	F28H6.1	0.000863231	-1.95021	0	negative	7.49821	-14.6231
WBGene00001228	eif-3.E	B0511.10	0.000864751	0.230702	0	positive	182.585	42.1227
WBGene00008944		F19B2.5	0.000865438	-0.466933	0	negative	23.2097	-10.8374
WBGene00008102		C44H9.7	0.000866323	-4.25082	0	negative	0.185917	-0.790301
WBGene00011893		T21C9.6	0.00086786	-1.46137	0	negative	13.0885	-19.1272
WBGene00009190		F27D4.6	0.000871092	-2.82553	0	negative	4.77021	-13.4784
WBGene00013650		Y105C5B.9	0.000871925	-2.2498	0	negative	3.97937	-8.9528
WBGene00016577	clec-3	C41H7.7	0.000872028	2.18992	0	positive	5.21376	11.4177
WBGene00003625	nhr-31	C26B2.3	0.000874084	-0.960004	0	negative	21.1026	-20.2585
WBGene00013870		ZC373.5	0.000875031	-2.93201	0	negative	5.21754	-15.2979
WBGene00018334	cyp-33E2	F42A9.5	0.000880231	-2.34638	0	negative	5.81831	-13.652
WBGene00009626		F42A8.1	0.000882321	-0.591047	0	negative	35.6012	-21.042
WBGene00009512	bigr-1	F37H8.3	0.000885103	-3.33923	0	negative	2.13675	-7.13511
WBGene00020343	acs-3	T08B1.6	0.000887565	-1.3222	0	negative	8.64692	-11.433
WBGene00002223	klp-12	T01G1.1	0.000894326	-0.401366	0	negative	99.387	-39.8906
WBGene00017928	tut-1	F29C4.6	0.000894656	0.702939	0	positive	47.3202	33.2632
WBGene00010887		M7.12	0.000894848	-2.10096	0	negative	6.56074	-13.7839
WBGene00019751		M03D4.4	0.000895639	-2.41411	0	negative	0.979982	-2.36579
WBGene00014112		ZK856.11	0.000896408	0.475532	0	positive	69.5454	33.0711
WBGene00010409		H21P03.2	0.000904634	0.400911	0	positive	136.497	54.7233
WBGene00011058	fdps-1	R06C1.2	0.00090476	0.454502	0	positive	84.5365	38.422
WBGene00001412	fem-2	T19C3.8	0.000910813	0.41165	0	positive	151.05	62.1796
WBGene00007056	crn-7	F09G8.2	0.000912447	-1.97078	0	negative	8.62812	-17.0042
WBGene00010843		M03C11.6	0.000915708	1.86308	0	positive	10.4587	19.4854
WBGene00007317		C05A9.2	0.000918354	-2.48323	0	negative	2.26518	-5.62495
WBGene00016576	lido-9	C41H7.6	0.000918477	0.748204	0	positive	44.4116	33.2289
WBGene00012014		T25B9.8	0.000920687	-1.21237	0	negative	19.7579	-23.9539
WBGene00012256	lpr-5	W04G3.2	0.000922823	-2.27565	0	negative	0.312208	-0.710477
WBGene00001452	flp-9	C36H8.3	0.000927574	-1.32932	0	negative	13.2177	-17.5706
WBGene00017085		E01A2.2	0.000933711	0.241609	0	positive	237.857	57.4684
WBGene00007055	tag-196	F41E6.6	0.000935221	-0.476247	0	negative	72.3178	-34.4411
WBGene00009663	hda-5	F43G6.11	0.000936131	-2.7079	0	negative	6.54264	-17.7168
WBGene00001520	gas-1	K09A9.5	0.00094078	-0.543507	0	negative	77.4505	-42.0949
WBGene00021146	lgc-45	W10G11.16	0.000942181	-2.27614	0	negative	6.72207	-15.3004
WBGene00003958	pcp-3	F23B2.11	0.00094572	-0.670253	0	negative	32.2862	-21.6399
WBGene00020757	ucr-2.3	T24C4.1	0.000947023	0.195424	0	positive	163.855	32.0212
WBGene00000728	col-155	F55C10.3	0.000948794	-1.5642	0	negative	10.292	-16.0987
WBGene00007384	swt-3	C06G8.1	0.000955461	-1.46238	0	negative	4.94792	-7.23574
WBGene00007789		C28A5.2	0.000956616	0.878646	0	positive	45.7623	40.2089
WBGene00000068	acy-1	F17C8.1	0.000960795	-2.63713	0	negative	4.57646	-12.0687
WBGene00015816		C16A11.3	0.000962745	1.235	0	positive	18.7151	23.1132
WBGene00022785		ZK652.6	0.000964207	0.681686	0	positive	83.1412	56.6762
WBGene00011428	nlp-80	T04C12.3	0.000968873	-2.08458	0	negative	6.54277	-13.6389
WBGene00016318		C32D5.11	0.000969241	0.495189	0	positive	140.396	69.5224
WBGene00003955	pcn-1	W03D2.4	0.000970926	0.0935867	0	positive	631.011	59.0542
WBGene00007848	cytb-5.1	C31E10.7	0.000979781	-0.564898	0	negative	43.2422	-24.4274
WBGene00003907	paf-2	C52B9.7	0.000988333	-2.06466	0	negative	7.3644	-15.205
WBGene00012111		T28A8.5	0.00098871	1.09714	0	positive	26.8999	29.513
WBGene00000205	arx-7	M01B12.3	0.000991507	0.730429	0	positive	42.2862	30.8871
WBGene00044310		H20J04.9	0.000995031	1.39899	0	positive	16.356	22.8819
WBGene00011435		T04D3.8	0.000996615	-1.22924	0	negative	14.7254	-18.1012
WBGene00011281		R74.7	0.000998526	0.545736	0	positive	88.6115	48.3585
WBGene00010976		R02D5.1	0.00100001	-1.26903	0	negative	6.22906	-7.90489
WBGene00017506		F16B4.4	0.00100067	-0.483893	0	negative	44.954	-21.7529
WBGene00016621	arch-1	C43H8.1	0.00100083	1.48893	0	positive	15.7347	23.4278
WBGene00016650	ubr-4	C44E4.1	0.00100119	-0.317015	0	negative	126.942	-40.2425
WBGene00016419	tyr-4	C34G6.2	0.00101009	-0.53906	0	negative	49.7663	-26.827
WBGene00015976		C18E3.9	0.00101095	0.400607	0	positive	80.5245	32.2587
WBGene00018475	mrpl-14	F45E12.5	0.00101945	0.838243	0	positive	51.1738	42.8961
WBGene00004385	rnp-2	K08D10.4	0.0010222	0.615895	0	positive	65.8649	40.5658
WBGene00017063	mctp-1	D2092.1	0.00102248	-2.75302	0	negative	5.31171	-14.6232
WBGene00019124		F59E12.9	0.00102278	0.189493	0	positive	287.708	54.5187
WBGene00015695	ugt-26	C10H11.6	0.00102767	-0.799644	0	negative	23.1434	-18.5065
WBGene00020695		T22F3.2	0.00102931	0.516805	0	positive	100.632	52.0069
WBGene00000478	cfz-2	F27E11.3	0.00103178	-1.48564	0	negative	3.91897	-5.82218
WBGene00013220	ctl-3	Y54G11A.13	0.00103944	-2.39523	0	negative	4.97251	-11.9103
WBGene00011531	rsbp-1	T06D10.1	0.00105516	-1.29428	0	negative	10.8783	-14.0795
WBGene00017834		F26F12.3	0.00105954	-0.232474	0	negative	84.8904	-19.7348
WBGene00007128	memb-1	B0272.2	0.0010678	1.38346	0	positive	17.3579	24.0141
WBGene00016636	perm-2	C44B12.1	0.00107662	-0.0246228	0	negative	1507.94	-37.1298
WBGene00044922		Y43C5A.7	0.00107895	-1.57743	0	negative	5.17887	-8.16932
WBGene00000369	ccf-1	Y56A3A.20	0.00108007	0.194058	0	positive	218.417	42.3855
WBGene00017999	emc-6	F33D4.7	0.00108379	0.673087	0	positive	44.3228	29.8331
WBGene00014017		ZK632.10	0.00108897	-0.254303	0	negative	138.292	-35.168
WBGene00017843		F26G5.1	0.00109117	0.53963	0	positive	80.9613	43.6891
WBGene00007112		B0035.13	0.00109199	-0.625905	0	negative	25.2745	-15.8194
WBGene00003860	oig-2	Y38F1A.9	0.00109315	-1.45859	0	negative	12.7359	-18.5764
WBGene00013035		Y49E10.16	0.00109364	-0.807141	0	negative	34.9988	-28.249
WBGene00006513	rimb-1	Y39A3CL.2	0.00109526	-2.90617	0	negative	3.82921	-11.1283
WBGene00017269		F08F8.4	0.00109734	0.29652	0	positive	120.186	35.6375
WBGene00006722	ubh-2	Y40G12A.2	0.00110629	0.921535	0	positive	31.3156	28.8584
WBGene00017426		F13C5.5	0.00110909	-2.70807	0	negative	4.51351	-12.2229
WBGene00020869		T28A11.2	0.00111207	-0.537589	0	negative	45.0981	-24.2442
WBGene00016166		C27F2.4	0.00111308	0.615738	0	positive	60.8269	37.4534
WBGene00009049		F22B8.7	0.00111485	-1.0776	0	negative	16.9185	-18.2314
WBGene00011439		T04F3.4	0.00112109	-2.2396	0	negative	5.84177	-13.0833
WBGene00005663	sars-1	C47E12.1	0.00113249	0.197231	0	positive	213.455	42.0998
WBGene00019492		K07E3.4	0.00113593	-0.515157	0	negative	70.5253	-36.3316
WBGene00018740	tra-4	F53B3.1	0.00113623	0.851151	0	positive	41.052	34.9415
WBGene00013436		Y66D12A.10	0.00113796	0.659338	0	positive	59.0646	38.9436
WBGene00019946	chat-1	R08C7.2	0.00113895	0.425495	0	positive	120.472	51.2604
WBGene00018984		F56F10.1	0.00113896	-0.512169	0	negative	62.7487	-32.1379
WBGene00019905		R05G9.3	0.00114564	0.647969	0	positive	41.3279	26.7792
WBGene00016289	lntl-1	C31H1.6	0.00114697	-2.57304	0	negative	6.75923	-17.3917
WBGene00005018	sqt-3	F23H12.4	0.00115454	-0.176032	0	negative	6.06988	-1.06849
WBGene00008652		F10D11.6	0.00115641	-2.47497	0	negative	4.96067	-12.2775
WBGene00020806		T25F10.3	0.0011604	-2.72443	0	negative	4.98142	-13.5715
WBGene00001411	fem-1	F35D6.1	0.00116059	0.575706	0	positive	75.2343	43.3128
WBGene00018269	acs-11	F41C3.3	0.00116412	0.541959	0	positive	76.2134	41.3046
WBGene00013039	scav-3	Y49E10.20	0.00116451	-0.47168	0	negative	109.057	-51.4399
WBGene00022734		ZK418.5	0.00116632	0.509032	0	positive	95.8573	48.7944
WBGene00012546		Y37D8A.4	0.00117357	0.637762	0	positive	60.652	38.6816
WBGene00010646		K08C7.1	0.0011779	-1.82249	0	negative	9.89557	-18.0346
WBGene00015894	acdh-2	C17C3.12	0.00118827	-0.701936	0	negative	21.6709	-15.2116
WBGene00013008	clec-146	Y48E1B.9	0.00119115	-1.37396	0	negative	9.89105	-13.59
WBGene00000482	chd-3	T14G8.1	0.00120024	-0.314796	0	negative	46.9949	-14.7938
WBGene00017448		F14B8.6	0.00120134	-2.36183	0	negative	5.4161	-12.7919
WBGene00011883	mrpl-50	T21B10.1	0.00121173	0.532512	0	positive	60.5613	32.2496
WBGene00020911	cpt-6	W01A11.5	0.00121452	-0.809778	0	negative	18.4752	-14.9608
WBGene00020082	gcp-2.1	R57.1	0.00122342	-0.568953	0	negative	60.7191	-34.5463
WBGene00012460	dhps-1	Y17G7B.4	0.0012338	0.851331	0	positive	37.6968	32.0924
WBGene00001454	flp-11	K02G10.4	0.00123655	-1.63104	0	negative	8.73208	-14.2424
WBGene00011634		T09A5.5	0.00123912	0.872289	0	positive	41.3816	36.0967
WBGene00006374	syx-4	T01B11.3	0.00123963	0.814441	0	positive	43.5726	35.4873
WBGene00022850		ZK1127.3	0.00124067	0.53024	0	positive	79.1818	41.9853
WBGene00000712	col-139	F41F3.4	0.00124291	-1.55255	0	negative	2.3818	-3.69786
WBGene00009086		F23D12.2	0.00125	1.05886	0	positive	20.836	22.0625
WBGene00009621	fipr-21	F41E7.5	0.00125593	-0.611439	0	negative	24.3759	-14.9044
WBGene00007586	ril-2	C14C10.3	0.00125774	0.302937	0	positive	158.218	47.9303
WBGene00021576	fbxc-51	Y46B2A.1	0.00126308	-0.451145	0	negative	6.7521	-3.04618
WBGene00010491		K02B7.3	0.00126469	-0.989392	0	negative	16.8593	-16.6805
WBGene00020756		T24A6.20	0.00127433	-1.53252	0	negative	11.6557	-17.8627
WBGene00010813	pitp-1	M01F1.7	0.00127853	-1.67002	0	negative	11.5569	-19.3003
WBGene00004297	rad-51	Y43C5A.6	0.00128051	0.502099	0	positive	108.056	54.2547
WBGene00020651		T21D12.12	0.00128304	-2.09548	0	negative	7.34225	-15.3855
WBGene00003473	mtl-1	K11G9.6	0.00128468	-0.669378	0	negative	1.16032	-0.776694
WBGene00017775		F25B5.3	0.00128511	-0.225106	0	negative	244.696	-55.0827
WBGene00007012	mdt-4	ZK546.13	0.00128735	0.646585	0	positive	66.3317	42.8891
WBGene00020114	pde-4	R153.1	0.00128867	-1.10725	0	negative	18.7568	-20.7685
WBGene00011850		T20B3.1	0.00129129	-2.58575	0	negative	3.36097	-8.69063
WBGene00022615		ZC449.5	0.00129291	-1.70074	0	negative	10.1035	-17.1835
WBGene00013862	wdr-5.3	ZC302.2	0.00129307	0.355907	0	positive	137.899	49.079
WBGene00015974	snrp-40.2	C18E3.5	0.00129378	0.74645	0	positive	38.4907	28.7314
WBGene00001065	dpy-3	EGAP7.1	0.00129462	-2.21689	0	negative	0.25923	-0.574685
WBGene00004077	pop-1	W10C8.2	0.00129643	-0.635238	0	negative	33.9795	-21.5851
WBGene00017154	ugt-57	F01E11.1	0.00129714	-2.62547	0	negative	0.348376	-0.914651
WBGene00002053	ifb-1	F10C1.2	0.00130056	-0.228959	0	negative	102.261	-23.4134
WBGene00020886	ttr-6	T28B4.3	0.00130509	-0.353736	0	negative	76.7699	-27.1562
WBGene00011522	srap-1	T06D8.1	0.00131823	-1.41244	0	negative	13.365	-18.8772
WBGene00006870	vab-3	F14F3.1	0.00133522	-1.83932	0	negative	3.46105	-6.36596
WBGene00011274		R53.5	0.00133615	-0.754678	0	negative	45.2615	-34.1579
WBGene00001479	fmo-4	F53F4.5	0.00134059	-1.34737	0	negative	15.4489	-20.8153
WBGene00003990	pfn-2	F35C8.6	0.0013419	-0.465929	0	negative	64.5325	-30.0675
WBGene00011062		R06C7.2	0.0013444	1.12623	0	positive	23.0093	25.9138
WBGene00011688		T10C6.6	0.00134613	0.43856	0	positive	83.4546	36.5999
WBGene00011676	cyp-13A2	T10B9.7	0.00134651	-1.77596	0	negative	6.65764	-11.8237
WBGene00009937	lsl-1	F52F12.4	0.00135013	0.424214	0	positive	99.3189	42.1325
WBGene00010227		F58A4.2	0.00136862	0.627062	0	positive	56.2089	35.2465
WBGene00004076	pod-2	W09B6.1	0.00137269	-0.203458	0	negative	249.157	-50.6931
WBGene00017773	dct-6	F25B5.1	0.00137682	-1.07084	0	negative	18.8523	-20.1878
WBGene00021359		Y37E11AL.3	0.00138997	0.278748	0	positive	155.615	43.3774
WBGene00000263		F23H11.5	0.00139028	-0.23024	0	negative	197.666	-45.5106
WBGene00017303		F09F7.6	0.0013909	-2.22749	0	negative	4.49496	-10.0125
WBGene00009877		F49C12.7	0.0014034	-0.783314	0	negative	8.84508	-6.92847
WBGene00007464	algn-8	C08H9.3	0.00140482	0.907	0	positive	42.0084	38.1017
WBGene00017970		F32A5.4	0.00140591	-0.741872	0	negative	31.2069	-23.1515
WBGene00000416	ced-2	Y41D4B.13	0.00141696	0.376311	0	positive	126.175	47.4812
WBGene00015487	mrps-17	C05D11.10	0.00142514	0.851865	0	positive	37.9481	32.3267
WBGene00019478	cri-2	K07C11.5	0.00142661	-1.43019	0	negative	10.6892	-15.2875
WBGene00012715	snpc-1.2	Y39E4B.2	0.00142713	0.388852	0	positive	139.735	54.3361
WBGene00002990	lin-1	C37F5.1	0.00142792	-1.74977	0	negative	7.4886	-13.1033
WBGene00020569	lgc-32	T19D7.1	0.00143374	-2.07678	0	negative	7.17039	-14.8913
WBGene00020246	clic-1	T05B11.3	0.00143521	0.249955	0	positive	142.573	35.6367
WBGene00013605		Y95D11A.1	0.00143931	1.0514	0	positive	26.2607	27.6104
WBGene00007904		C33G3.4	0.00144193	-0.7868	0	negative	7.19863	-5.66388
WBGene00011988	har-2	T24D1.5	0.00144247	0.387611	0	positive	110.303	42.7546
WBGene00008953		F19C6.4	0.00144715	-2.24632	0	negative	5.95356	-13.3736
WBGene00021648	mis-12	Y47G6A.24	0.00145166	0.633015	0	positive	64.7596	40.9938
WBGene00011819	hal-2	T16H12.11	0.00145381	0.734391	0	positive	51.3479	37.7094
WBGene00001745	gsa-1	R06A10.2	0.00145462	-2.22203	0	negative	6.67922	-14.8414
WBGene00000774	cpf-2	F56A8.6	0.00145492	0.557635	0	positive	88.4984	49.3498
WBGene00013998	gtf-2E1	ZK550.4	0.00145873	0.51163	0	positive	98.7361	50.5163
WBGene00016674		C45G9.2	0.00146014	0.736107	0	positive	49.037	36.0965
WBGene00011529		T06D8.9	0.00146556	0.316308	0	positive	107.51	34.0064
WBGene00001753	gst-5	R03D7.6	0.00146729	-1.37568	0	negative	12.9637	-17.8338
WBGene00011198		R10E4.1	0.0014726	-0.804472	0	negative	33.6993	-27.1101
WBGene00012864		Y45F3A.9	0.00147417	1.20126	0	positive	18.4625	22.1784
WBGene00020360	math-41	T08E11.4	0.00147762	-2.67929	0	negative	3.00732	-8.05748
WBGene00012234	ints-4	W04A4.5	0.00148948	-0.426033	0	negative	76.1849	-32.4572
WBGene00017423		F13C5.2	0.00149271	-0.265386	0	negative	27.0455	-7.1775
WBGene00001571	gei-14	K01C8.5	0.00149467	0.397524	0	positive	113.816	45.2445
WBGene00017718		F22F4.5	0.00149946	-2.109	0	negative	5.2247	-11.0189
WBGene00002977	lev-10	Y105E8A.7	0.00149997	-1.92236	0	negative	9.10774	-17.5084
WBGene00000005	aat-4	T13A10.10	0.00150026	-2.02419	0	negative	7.7068	-15.6
WBGene00003991	pfn-3	K03E6.6	0.00150141	-1.20658	0	negative	14.3211	-17.2796
WBGene00009145		F26A3.7	0.00150605	0.719946	0	positive	55.5047	39.9604
WBGene00011828	nepr-1	T19A6.3	0.00150794	0.451761	0	positive	75.0511	33.9051
WBGene00000983	dhs-20	F35B12.2	0.00150805	-1.23734	0	negative	3.41848	-4.22981
WBGene00012299		W06D11.1	0.00151029	1.11182	0	positive	20.1777	22.4341
WBGene00044067	zipt-7.1	T28F3.3	0.00151748	0.123121	0	positive	149.159	18.3646
WBGene00001680	gpb-2	F52A8.2	0.00152122	-1.93652	0	negative	8.24069	-15.9583
WBGene00013647		Y105C5B.5	0.00152597	-0.309624	0	negative	74.6334	-23.1083
WBGene00007666		C18B12.4	0.00153036	0.775314	0	positive	41.7772	32.3904
WBGene00004348	rgs-5	B0336.4	0.00154043	-0.724048	0	negative	19.6758	-14.2462
WBGene00004930	sod-1	C15F1.7	0.00154279	0.218561	0	positive	142.947	31.2427
WBGene00012443		Y15E3A.4	0.0015429	-1.76259	0	negative	10.5372	-18.5728
WBGene00006311	sun-1	F57B1.2	0.00154312	0.355788	0	positive	160.568	57.1283
WBGene00008779		F14B4.1	0.00154349	-1.45907	0	negative	3.1347	-4.57375
WBGene00003063	lpd-7	R13A5.12	0.00154678	0.254571	0	positive	191.177	48.6681
WBGene00077761	zip-9	F17C11.17	0.0015504	-0.54485	0	negative	42.9164	-23.383
WBGene00021614		Y47A7.2	0.00155993	-2.5579	0	negative	4.38193	-11.2086
WBGene00011868	best-18	T20G5.4	0.00156751	-2.56956	0	negative	4.26101	-10.9489
WBGene00017402		F12E12.1	0.00158232	0.847795	0	positive	34.1574	28.9585
WBGene00016405	hecd-1	C34D4.14	0.00158721	-0.161361	0	negative	256.773	-41.433
WBGene00010456		K01C8.1	0.00159081	-0.291384	0	negative	94.1614	-27.4371
WBGene00016509	adss-1	C37H5.6	0.00159615	0.135694	0	positive	326.571	44.3138
WBGene00002065	iff-2	F54C9.1	0.00159724	-0.239898	0	negative	134.407	-32.2441
WBGene00009577		F40F8.4	0.00160605	-1.95354	0	negative	8.37205	-16.3551
WBGene00003178	mec-17	F57H12.7	0.00160818	-2.30567	0	negative	4.78896	-11.0418
WBGene00021334	vps-4	Y34D9A.10	0.00160877	0.452506	0	positive	120.76	54.6444
WBGene00001976	hmg-11	T05A7.4	0.0016113	-0.301209	0	negative	18.1686	-5.47255
WBGene00013569	bath-36	Y75B12B.4	0.00162821	-2.54315	0	negative	5.50525	-14.0007
WBGene00013259	trpp-5	Y57A10A.16	0.00163533	0.939547	0	positive	32.2939	30.3416
WBGene00020693	lron-8	T22E7.1	0.00164109	-1.7854	0	negative	7.50871	-13.406
WBGene00021191		Y14H12B.1	0.00164121	0.4106	0	positive	146.262	60.0552
WBGene00044068	syd-9	ZK867.1	0.00165006	-1.15276	0	negative	3.07947	-3.54989
WBGene00003002	lin-13	C03B8.4	0.0016514	-0.225207	0	negative	185.211	-41.7109
WBGene00007296	arrd-25	C04C11.2	0.00165209	-0.824985	0	negative	21.0289	-17.3485
WBGene00021093		W08F4.3	0.00165239	0.21397	0	positive	222.66	47.6426
WBGene00020833		T26C12.3	0.00165424	-3.00884	0	negative	1.22361	-3.68166
WBGene00020684		T22D1.5	0.00165482	0.155676	0	positive	289.089	45.0043
WBGene00020247		T05B11.4	0.00165908	-1.98751	0	negative	7.99254	-15.8852
WBGene00010493	meg-2	K02B9.2	0.00167663	0.613963	0	positive	55.3041	33.9547
WBGene00007299		C04F12.5	0.00168338	-1.35644	0	negative	14.9204	-20.2387
WBGene00001591	glc-1	F11A5.10	0.0016844	-1.40661	0	negative	12.7234	-17.8968
WBGene00015294		C01C10.2	0.00168587	-1.6585	0	negative	7.6303	-12.6549
WBGene00000098	air-1	K07C11.2	0.00168877	0.17572	0	positive	280.977	49.3732
WBGene00016027		C23H5.8	0.00168994	-0.1871	0	negative	144.162	-26.9727
WBGene00002046	icln-1	C01F6.8	0.0016924	0.448844	0	positive	89.0099	39.9515
WBGene00016131		C26B9.1	0.00169265	-1.27784	0	negative	13.5841	-17.3582
WBGene00010892	dhhc-6	M18.8	0.00169272	0.41277	0	positive	101.041	41.7069
WBGene00002827	let-653	C29E6.1	0.00169947	-1.64542	0	negative	3.94016	-6.4832
WBGene00013042	cccp-1	Y49E10.23	0.00170369	-2.18836	0	negative	5.69176	-12.4556
WBGene00020742		T23H2.3	0.0017076	0.314916	0	positive	150.28	47.3255
WBGene00045038	ule-2	F13G11.3	0.00171181	-0.151284	0	negative	144.663	-21.8853
WBGene00012903	vps-2	Y46G5A.12	0.0017234	0.421922	0	positive	89.9614	37.9567
WBGene00012713	bckd-1A	Y39E4A.3	0.00173127	-0.328228	0	negative	156.26	-51.289
WBGene00004356	rhi-1	F46H6.1	0.0017332	0.747982	0	positive	41.3398	30.9214
WBGene00010666		K08E4.2	0.00173572	-1.14855	0	negative	18.5002	-21.2484
WBGene00022441		Y110A2AL.4	0.00174183	-3.08177	0	negative	0.651921	-2.00907
WBGene00009926	noah-2	F52B11.3	0.00174294	-0.237665	0	negative	6.42564	-1.52715
WBGene00003155	mcm-3	C25D7.6	0.00174845	0.141369	0	positive	457.158	64.6281
WBGene00012782		Y43C5A.2	0.00175009	-0.36987	0	negative	82.895	-30.6603
WBGene00006801	unc-68	K11C4.5	0.00175144	-0.792428	0	negative	33.6848	-26.6928
WBGene00019426	cutl-16	K06A1.3	0.00175161	-2.97079	0	negative	0.930282	-2.76367
WBGene00004092	ppt-1	F44C4.5	0.00175245	-2.25552	0	negative	3.0786	-6.94385
WBGene00007488	dph-2	C09G5.2	0.00175881	0.916033	0	positive	39.5121	36.1944
WBGene00017272		F08F8.7	0.00176606	0.485262	0	positive	50.174	24.3475
WBGene00006856	usp-14	C13B4.2	0.00176752	0.197475	0	positive	294.591	58.1744
WBGene00008394		D1086.7	0.00177165	-0.596928	0	negative	32.637	-19.4819
WBGene00006423	asd-2	T21G5.5	0.00177342	-0.56813	0	negative	23.3197	-13.2486
WBGene00015356	tag-278	C02F12.7	0.00177766	-2.07056	0	negative	6.17053	-12.7764
WBGene00011449		T04H1.2	0.00178703	0.226427	0	positive	279.065	63.1878
WBGene00006844	unc-120	D1081.2	0.00179251	-1.62793	0	negative	4.13941	-6.73865
WBGene00022801	pcp-5	ZK688.6	0.0017965	-0.673135	0	negative	46.6713	-31.4161
WBGene00013001	noa-1	Y48E1B.2	0.00180389	0.774907	0	positive	38.6551	29.9541
WBGene00002241	kup-1	F10C2.2	0.00180554	0.228626	0	positive	179.215	40.9733
WBGene00006706	ubc-9	F29B9.6	0.00181157	0.162085	0	positive	340.398	55.1733
WBGene00007394		C06H5.6	0.00181779	-1.19661	0	negative	16.3733	-19.5924
WBGene00014090		ZK822.2	0.00182134	-0.788683	0	negative	24.2562	-19.1305
WBGene00013268	tric-1B.2	Y57A10A.28	0.00182256	0.68024	0	positive	49.6195	33.7532
WBGene00002048	ida-1	B0244.2	0.00182953	-0.934152	0	negative	20.6646	-19.3039
WBGene00013567		Y75B12B.1	0.00183335	0.176971	0	positive	241.518	42.7417
WBGene00019779	endu-2	M60.2	0.00184556	-0.361069	0	negative	39.8961	-14.4053
WBGene00017275		F08F8.10	0.00184659	0.450866	0	positive	75.2368	33.9217
WBGene00003248	mig-17	F57B7.4	0.00185513	-2.46233	0	negative	4.6193	-11.3742
WBGene00018064	cdc-73	F35F11.1	0.00185523	0.470419	0	positive	100.249	47.1589
WBGene00022048	fln-1	Y66H1B.2	0.00185561	-0.148783	0	negative	392.043	-58.3295
WBGene00020687	ruvb-2	T22D1.10	0.00187758	0.358706	0	positive	133.112	47.748
WBGene00016609		C43E11.12	0.00188445	0.38974	0	positive	66.6612	25.9805
WBGene00015680	egal-1	C10G6.1	0.00189694	-1.65061	0	negative	11.3611	-18.7529
WBGene00000858	cwn-2	W01B6.1	0.0018977	-2.27004	0	negative	2.87286	-6.52151
WBGene00015131		B0303.11	0.00190072	-1.447	0	negative	14.5882	-21.1091
WBGene00002989	lim-7	C04F1.3	0.0019014	-2.64	0	negative	4.58654	-12.1085
WBGene00004993	spp-8	C28C12.5	0.00191099	-0.693728	0	negative	22.7771	-15.8011
WBGene00000111	alh-5	T08B1.3	0.00191115	-1.77186	0	negative	7.07158	-12.5298
WBGene00011813		T16H12.3	0.00191166	0.56572	0	positive	49.1289	27.7932
WBGene00012897	pisy-1	Y46G5A.5	0.00191921	0.42768	0	positive	92.8619	39.7152
WBGene00020471	pho-14	T13B5.3	0.00192208	-0.451378	0	negative	74.0204	-33.4112
WBGene00003084	lst-2	R160.7	0.00192255	0.883014	0	positive	33.4752	29.5591
WBGene00003997	pgp-3	ZK455.7	0.0019237	-1.35577	0	negative	10.2538	-13.9018
WBGene00008850		F15B9.6	0.00193198	-1.92262	0	negative	0.875563	-1.68337
WBGene00004048	plx-2	K04B12.1	0.00193713	-2.98716	0	negative	1.31872	-3.93923
WBGene00006369	sym-4	R03E1.1	0.00193902	0.763701	0	positive	40.9527	31.2756
WBGene00007944		C34F6.10	0.00194846	-1.42803	0	negative	11.9909	-17.1234
WBGene00004256	pxn-1	ZK994.3	0.0019508	-1.19404	0	negative	16.3485	-19.5207
WBGene00012550	spcs-2	Y37D8A.10	0.00195447	0.228194	0	positive	169.561	38.6928
WBGene00022737	tofu-7	ZK418.8	0.00195799	0.809107	0	positive	40.6692	32.9057
WBGene00004392	rnr-2	C03C10.3	0.00196019	0.0357642	0	positive	939.917	33.6154
WBGene00016219	pals-24	C29F9.4	0.00196205	-1.49066	0	negative	7.09726	-10.5796
WBGene00015926		C17H11.6	0.00196914	-1.32218	0	negative	16.0514	-21.2228
WBGene00016014		C23G10.7	0.00197389	0.339516	0	positive	137.141	46.5615
WBGene00000475	cey-4	Y39A1C.3	0.00197409	-0.0849004	0	negative	663.045	-56.2928
WBGene00016823		C50E3.12	0.00197971	0.504443	0	positive	67.8772	34.2402
WBGene00011691		T10C6.10	0.00198912	0.877538	0	positive	29.498	25.8856
WBGene00011404		T03F7.7	0.00199643	-1.77202	0	negative	7.82713	-13.8698
WBGene00005000	spp-15	C48E7.10	0.00200815	-1.11014	0	negative	13.5514	-15.0439
WBGene00020633	aakg-2	T20F7.6	0.0020132	-1.32865	0	negative	20.9909	-27.8895
WBGene00004503	rpt-3	F23F12.6	0.00201943	0.120172	0	positive	313.881	37.7196
WBGene00044471		F56D6.9	0.00201965	-3.81741	0	negative	0.240501	-0.918093
WBGene00011407	ppat-1	T04A8.5	0.00202834	-1.22914	0	negative	13.3232	-16.3761
WBGene00010625		K07C5.2	0.00203022	-0.619426	0	negative	38.5919	-23.9048
WBGene00003154	mcm-2	Y17G7B.5	0.00203207	0.148329	0	positive	401.191	59.5084
WBGene00011089	kmo-1	R07B7.5	0.00203864	-1.32771	0	negative	12.2202	-16.2248
WBGene00012167	tofu-5	W01A8.5	0.00204552	0.415096	0	positive	134.984	56.0313
WBGene00015943	tiar-1	C18A3.5	0.00204629	0.154758	0	positive	300.099	46.4427
WBGene00015456		C04G6.6	0.00204812	-1.30913	0	negative	9.24404	-12.1017
WBGene00011275	psf-1	R53.6	0.00205251	0.349037	0	positive	65.2631	22.7793
WBGene00013200		Y54E5A.5	0.00205934	0.495394	0	positive	66.2571	32.8234
WBGene00009918	gcsh-2	F52A8.5	0.00206326	-0.600611	0	negative	55.5025	-33.3354
WBGene00000138	amx-2	B0019.1	0.00206455	-1.7948	0	negative	7.6858	-13.7944
WBGene00014176		ZK1010.2	0.00207183	0.588168	0	positive	71.1101	41.8246
WBGene00011304	mnk-1	R166.5	0.00207215	0.219899	0	positive	87.7074	19.2868
WBGene00007984	irx-1	C36F7.1	0.00208465	-1.53592	0	negative	4.99273	-7.66843
WBGene00021476	nsun-4	Y39G10AR.21	0.00208714	0.962261	0	positive	33.4432	32.1811
WBGene00019673		K12C11.1	0.00209287	-0.480177	0	negative	86.271	-41.4253
WBGene00001172	egl-3	C51E3.7	0.00209441	-0.325502	0	negative	69.9988	-22.7848
WBGene00008035		C39E9.12	0.00209723	0.28054	0	positive	184.282	51.6985
WBGene00007357		C06A12.3	0.00210521	-1.89682	0	negative	8.6523	-16.4119
WBGene00018316		F41H10.3	0.00210826	0.288599	0	positive	159.048	45.9011
WBGene00011175		R09E10.5	0.00211226	-2.36415	0	negative	0.278508	-0.658434
WBGene00001397	fat-5	W06D12.3	0.00211578	0.1967	0	positive	51.8104	10.1911
WBGene00015083	egg-1	B0244.8	0.00211677	0.0730704	0	positive	739.244	54.0168
WBGene00012987		Y48C3A.3	0.00212939	-1.74714	0	negative	9.57724	-16.7327
WBGene00003748	nlp-10	F37A8.4	0.00213019	-2.184	0	negative	6.69722	-14.6268
WBGene00017467		F14F9.4	0.00213276	-2.81533	0	negative	2.74686	-7.73332
WBGene00020909		W01A11.1	0.00213421	-0.287048	0	negative	74.5939	-21.412
WBGene00017263		F08F3.6	0.00213461	0.259342	0	positive	132.342	34.3219
WBGene00000917	daf-25	Y48G1A.3	0.00214087	0.918129	0	positive	37.5623	34.487
WBGene00003408	mrp-2	F57C12.4	0.00214112	-1.68732	0	negative	11.3371	-19.1293
WBGene00004025	phy-2	F35G2.4	0.00214276	-1.33504	0	negative	12.1913	-16.2758
WBGene00015189		B0432.8	0.00214859	0.769433	0	positive	44.7085	34.4002
WBGene00007921		C34C12.2	0.00215032	-0.624103	0	negative	85.3398	-53.2608
WBGene00001824	hbl-1	F13D11.2	0.0021549	-0.343714	0	negative	5.47989	-1.88352
WBGene00019656	slc-25A10	K11G12.5	0.00215532	-0.535022	0	negative	55.1262	-29.4937
WBGene00003514	myo-2	T18D3.4	0.00216367	-0.495695	0	negative	49.1808	-24.3787
WBGene00006448	glod-4	C16C10.10	0.00216372	0.591851	0	positive	54.0605	31.9958
WBGene00012439		Y12A6A.1	0.00217405	-1.78893	0	negative	8.65642	-15.4857
WBGene00001683	gpd-1	T09F3.3	0.00217681	0.0930558	0	positive	372.91	34.7014
WBGene00001076	dpy-17	F54D8.1	0.00218104	-0.161094	0	negative	9.63271	-1.55178
WBGene00000039	acn-1	C42D8.5	0.00218465	-1.19119	0	negative	1.97699	-2.35497
WBGene00004773	sem-4	F15C11.1	0.00219458	-2.09204	0	negative	5.75063	-12.0305
WBGene00021315		Y32H12A.7	0.0021967	0.513654	0	positive	72.8823	37.4363
WBGene00008254		C51E3.9	0.00221287	-1.55377	0	negative	12.1612	-18.8957
WBGene00007765		C27B7.9	0.00221523	-0.327887	0	negative	37.343	-12.2443
WBGene00013742	sas-1	Y111B2A.24	0.0022154	0.504979	0	positive	81.617	41.2149
WBGene00014051	spv-1	ZK669.1	0.00221961	-2.08576	0	negative	6.14887	-12.8251
WBGene00001089	dre-1	K04A8.6	0.00222453	-0.888233	0	negative	24.3664	-21.6431
WBGene00018189	nhr-181	F38H12.3	0.00224648	-1.58493	0	negative	10.5577	-16.7332
WBGene00009783	rer-1	F46C5.8	0.0022492	0.413102	0	positive	87.0581	35.9639
WBGene00020592	ugt-12	T19H12.9	0.00225345	-0.695865	0	negative	34.9242	-24.3025
WBGene00004783	seu-1	Y73B6BL.5	0.00226021	0.297318	0	positive	133.478	39.6853
WBGene00016315		C32D5.7	0.00226255	-2.3921	0	negative	4.7912	-11.4611
WBGene00004464	rpn-8	R12E2.3	0.00226461	0.235719	0	positive	246.457	58.0948
WBGene00005643	srp-2	C05E4.1	0.00226603	-1.55538	0	negative	10.2266	-15.9063
WBGene00001599	glh-2	C55B7.1	0.00226889	0.238871	0	positive	179.542	42.8874
WBGene00012650	orc-1	Y39A1A.12	0.0022698	0.239973	0	positive	232.052	55.6862
WBGene00009796		F46G10.1	0.00227067	-0.659074	0	negative	29.5177	-19.4543
WBGene00001189	egl-21	F01D4.4	0.00228466	-0.494005	0	negative	50.2379	-24.8177
WBGene00018846	eef-1B.1	F54H12.6	0.00228898	0.041729	0	positive	756.732	31.5777
WBGene00015885	fbxa-65	C17B7.11	0.00229016	-1.4785	0	negative	9.20677	-13.6122
WBGene00022773		ZK616.3	0.00229249	0.946684	0	positive	20.761	19.6541
WBGene00000150	apm-1	F55A12.7	0.00229312	-1.12101	0	negative	18.8878	-21.1735
WBGene00007455	ugt-22	C08F11.8	0.00229477	-0.247734	0	negative	81.9019	-20.2899
WBGene00015160		B0361.6	0.0022987	0.488358	0	positive	85.3825	41.6972
WBGene00001031	dnj-13	F54D5.8	0.00230317	0.156603	0	positive	264.611	41.4388
WBGene00008720		F12F6.1	0.00231408	-0.318236	0	negative	168.104	-53.4967
WBGene00010678		K08F4.3	0.0023292	0.376578	0	positive	117.336	44.1862
WBGene00003730	nhx-2	B0495.4	0.00233371	-0.680374	0	negative	28.009	-19.0566
WBGene00000703	col-129	M18.1	0.00233896	-1.28101	0	negative	2.61922	-3.35525
WBGene00017463		F14D12.1	0.00234104	-2.70964	0	negative	3.58131	-9.70404
WBGene00011040	arv-1	R05H5.5	0.00234145	0.673924	0	positive	40.081	27.0115
WBGene00016101		C25E10.12	0.00234791	-1.46911	0	negative	9.63582	-14.1561
WBGene00184990		C14B1.12	0.00235431	0.776539	0	positive	33.6524	26.1324
WBGene00011713		T11F9.12	0.00235821	-0.775708	0	negative	25.6699	-19.9123
WBGene00016920		C54E4.5	0.00236161	-1.56656	0	negative	10.6415	-16.6705
WBGene00009146		F26C11.1	0.00237023	-2.47823	0	negative	3.12614	-7.7473
WBGene00004804	skn-1	T19E7.2	0.00237485	0.148701	0	positive	272.041	40.4527
WBGene00001460	flp-17	C52D10.11	0.00238315	-1.61268	0	negative	7.89156	-12.7265
WBGene00016631		C44B7.11	0.00238794	-1.00889	0	negative	21.5	-21.6911
WBGene00019240		H24K24.3	0.00238856	0.3304	0	positive	154.444	51.0282
WBGene00008622		F09C8.2	0.00239153	-0.390269	0	negative	37.2297	-14.5296
WBGene00018393	msra-1	F43E2.5	0.00239768	-0.0590457	0	negative	356.808	-21.068
WBGene00017447		F14B8.5	0.00239814	-2.20896	0	negative	4.86739	-10.7519
WBGene00021082	zip-11	W08E12.1	0.0024064	-0.936668	0	negative	17.7471	-16.6231
WBGene00016323		C32E8.5	0.00240706	0.294679	0	positive	105.359	31.047
WBGene00011835	pgap-1	T19B10.8	0.00241397	0.237773	0	positive	192.414	45.7507
WBGene00000203	arx-5	Y37D8A.1	0.00241991	0.554415	0	positive	80.573	44.6709
WBGene00021829	mrpl-17	Y54E10A.7	0.00242362	0.774986	0	positive	36.9162	28.6095
WBGene00013552	gmn-1	Y75B8A.17	0.0024247	0.400334	0	positive	101.035	40.4479
WBGene00000989	dhs-26	ZK816.5	0.00243256	-1.26724	0	negative	1.42969	-1.81176
WBGene00000868	cyb-3	T06E6.2	0.00243689	0.0390752	0	positive	1258	49.1565
WBGene00013484		Y69H2.9	0.00243689	-2.53791	0	negative	2.50884	-6.36723
WBGene00016614	trpp-12	C43H6.1	0.00243885	-1.22685	0	negative	13.792	-16.9207
WBGene00000756	col-183	F02D10.1	0.00244045	-4.06556	0	negative	0.0828321	-0.336759
WBGene00003374	mlk-1	K11D12.10	0.00244676	-1.31832	0	negative	16.7636	-22.0999
WBGene00001075	dpy-14	H27M09.4	0.00245063	-0.172439	0	negative	4.38242	-0.7557
WBGene00019780		M60.4	0.00246018	-0.859101	0	negative	31.6221	-27.1666
WBGene00001581	gfi-1	F57F4.3	0.00247558	-0.415774	0	negative	45.5349	-18.9322
WBGene00007592		C14H10.2	0.00247948	-1.21362	0	negative	12.8087	-15.5449
WBGene00001064	dpy-2	T14B4.6	0.00248072	-1.72442	0	negative	0.443232	-0.764318
WBGene00015569		C07D10.5	0.00248386	-0.526482	0	negative	14.1093	-7.42829
WBGene00018417		F44E2.3	0.00249212	0.563132	0	positive	60.6301	34.1427
WBGene00003949	pbs-3	Y38A8.2	0.00249313	0.259174	0	positive	196.272	50.8686
WBGene00009119	ndk-1	F25H2.5	0.00249494	0.0325949	0	positive	1134.4	36.9756
WBGene00001229	eif-3.F	D2013.7	0.002505	0.317978	0	positive	157.878	50.2016
WBGene00021046	sedl-1	W05H7.3	0.00250991	1.78853	0	positive	8.81881	15.7727
WBGene00015577	ugt-64	C07G3.9	0.0025138	-0.277994	0	negative	85.3892	-23.7377
WBGene00018729		F53A9.6	0.00251468	1.68223	0	positive	7.40942	12.4644
WBGene00010116	cest-13	F55F3.2	0.0025156	-1.97578	0	negative	5.08834	-10.0535
WBGene00002214	klc-1	M7.2	0.00252965	0.285	0	positive	234.679	66.8836
WBGene00016269		C30G4.4	0.00253965	-2.29193	0	negative	7.7723	-17.8135
WBGene00013109		Y51H4A.15	0.00254025	0.680629	0	positive	41.752	28.4177
WBGene00003876	pept-2	C06G8.2	0.00254248	-0.948243	0	negative	21.903	-20.7694
WBGene00016244		C30B5.2	0.00254481	0.374912	0	positive	89.0425	33.3831
WBGene00010993	vha-20	R03E1.2	0.00255493	-0.397336	0	negative	107.988	-42.9074
WBGene00021237	crtc-1	Y20F4.2	0.00255628	-1.81881	0	negative	9.06967	-16.496
WBGene00003234	mif-1	Y56A3A.3	0.00255628	-0.970943	0	negative	21.2751	-20.6569
WBGene00019351	lron-7	K03A1.2	0.00256268	-0.39526	0	negative	107.039	-42.308
WBGene00011738		T12G3.2	0.00256673	-0.370614	0	negative	57.0775	-21.1537
WBGene00000020	abt-2	F12B6.1	0.00256879	-1.94394	0	negative	7.94674	-15.448
WBGene00003847	blmp-1	F25D7.3	0.00256977	-1.69385	0	negative	6.16235	-10.4381
WBGene00009678	magu-4	F44D12.1	0.00257186	-1.31613	0	negative	14.3145	-18.8398
WBGene00009156	clec-196	F26D10.12	0.00259247	-0.711498	0	negative	4.0964	-2.91458
WBGene00014124	usip-1	ZK863.4	0.00260243	0.208037	0	positive	269.76	56.1201
WBGene00000556	cnc-2	R09B5.3	0.00260666	-1.9999	0	negative	1.64979	-3.2994
WBGene00012531		Y32F6B.1	0.00260771	-1.07844	0	negative	10.5591	-11.3873
WBGene00012997		Y48C3A.18	0.00260872	1.24707	0	positive	17.7356	22.1175
WBGene00011083	glo-1	R07B1.12	0.00260978	-2.26972	0	negative	3.34276	-7.58713
WBGene00009224		F28F8.7	0.0026134	-1.54714	0	negative	9.44823	-14.6178
WBGene00002011	hsp-12.2	C14B9.1	0.00261554	-1.16345	0	negative	14.2804	-16.6146
WBGene00022830		ZK973.1	0.00261629	-0.204526	0	negative	277.833	-56.8241
WBGene00020442	gen-1	T12A2.8	0.00261761	0.345088	0	positive	141.715	48.904
WBGene00007091	eri-12	B0001.6	0.00262051	-0.519719	0	negative	72.2725	-37.5614
WBGene00009165	gpx-1	F26E4.12	0.00262454	-1.4624	0	negative	13.0429	-19.074
WBGene00022139	tub-2	Y71G12A.3	0.00262741	-0.451056	0	negative	34.2291	-15.4392
WBGene00010796	clip-1	M01A8.2	0.00263343	-1.4433	0	negative	12.4337	-17.9455
WBGene00004369	rig-1	K09E2.4	0.00264692	-2.05545	0	negative	5.77668	-11.8737
WBGene00011838		T19C4.1	0.0026566	-3.50012	0	negative	0.537423	-1.88104
WBGene00016407	unk-1	C34D10.2	0.00265839	-0.683761	0	negative	21.8729	-14.9558
WBGene00007506	fbxc-58	C10C5.2	0.00268061	-2.39821	0	negative	2.0844	-4.99881
WBGene00003736	nhx-9	ZK822.3	0.00268708	-1.76641	0	negative	7.32934	-12.9466
WBGene00017071	aagr-1	D2096.3	0.00269217	-0.606899	0	negative	13.5968	-8.25189
WBGene00008484		E04D5.5	0.0026978	-1.8976	0	negative	4.38882	-8.32821
WBGene00013214		Y54G11A.3	0.00271298	0.313398	0	positive	125.025	39.1827
WBGene00006440	tag-63	Y47G6A.28	0.0027172	0.474295	0	positive	98.9499	46.9315
WBGene00023422	mrpl-21	F43C1.6	0.00272135	0.823543	0	positive	34.1087	28.09
WBGene00007207		B0564.7	0.00272456	0.581958	0	positive	68.6049	39.9252
WBGene00006961	xnp-1	B0041.7	0.00273127	-0.146098	0	negative	220.86	-32.2672
WBGene00020557		T19B4.3	0.00273414	-0.51576	0	negative	67.4895	-34.8084
WBGene00002997	lin-8	B0454.1	0.00273855	1.14401	0	positive	22.1907	25.3863
WBGene00004364	ric-4	Y22F5A.3	0.0027424	-1.75273	0	negative	9.03364	-15.8335
WBGene00021676	pid-2	Y48G1C.1	0.00274713	0.574647	0	positive	62.8443	36.1133
WBGene00009743	sptf-1	F45H11.1	0.00274734	-2.26901	0	negative	1.62863	-3.69537
WBGene00004750	sea-1	F19B10.9	0.00274983	0.570595	0	positive	42.8286	24.4378
WBGene00002131	inx-9	ZK792.3	0.0027499	-1.04703	0	negative	22.8464	-23.9208
WBGene00009733		F45G2.7	0.00275178	1.26681	0	positive	16.0686	20.3559
WBGene00006772	unc-36	C50C3.9	0.00276375	-2.38913	0	negative	4.41659	-10.5518
WBGene00012359		W09D10.1	0.00276693	0.359088	0	positive	127.624	45.8281
WBGene00008603		F09B9.4	0.00278506	-1.86198	0	negative	7.57951	-14.1129
WBGene00006474	wdr-5.1	C14B1.4	0.00279471	0.331506	0	positive	157.866	52.3334
WBGene00000843	cup-2	F25D7.1	0.00280629	0.204967	0	positive	131.094	26.8699
WBGene00021757	taco-1	Y50D7A.9	0.00280926	0.661692	0	positive	45.7411	30.2665
WBGene00016415	ampd-1	C34F11.3	0.00281429	-0.394482	0	negative	91.2138	-35.9822
WBGene00019126	sam-4	F59E12.11	0.00281593	0.408928	0	positive	83.1808	34.0149
WBGene00017074		D2096.7	0.00282635	0.618236	0	positive	53.063	32.8054
WBGene00017381	ddr-2	F11D5.3	0.00284155	-2.86594	0	negative	1.68635	-4.83297
WBGene00013407	fld-1	Y63D3A.8	0.00284462	0.42189	0	positive	79.9703	33.7387
WBGene00011105		R07E3.4	0.0028473	-0.961431	0	negative	18.1363	-17.4368
WBGene00004902	snf-3	T13B5.1	0.00285917	-1.2143	0	negative	16.6553	-20.2245
WBGene00021133	tomm-22	W10D9.5	0.00286167	0.589725	0	positive	42.8743	25.2841
WBGene00000249	bir-1	T27F2.3	0.00286274	0.469174	0	positive	72.1625	33.8568
WBGene00008452	mrps-5	E02A10.1	0.00287974	0.405778	0	positive	87.4808	35.4978
WBGene00020445		T12B3.2	0.00289243	-1.30954	0	negative	9.68036	-12.6768
WBGene00021425	ppgn-1	Y38F2AR.7	0.00289618	0.567412	0	positive	58.5994	33.25
WBGene00001758	gst-10	Y45G12C.2	0.00289863	-1.09658	0	negative	11.6045	-12.7253
WBGene00010362	enu-3.1	H04D03.1	0.00290724	-1.05782	0	negative	14.2854	-15.1114
WBGene00006803	unc-70	K11C4.3	0.00292963	-0.345062	0	negative	80.2903	-27.7051
WBGene00009784		F46C5.9	0.00293128	0.440998	0	positive	124.73	55.0055
WBGene00007698	qns-1	C24F3.4	0.0029323	0.392883	0	positive	95.3105	37.4459
WBGene00007155		B0379.1	0.0029395	-1.20844	0	negative	17.1972	-20.7817
WBGene00013074	hmit-1.2	Y51A2D.5	0.00294502	-1.18331	0	negative	12.8245	-15.1754
WBGene00000122	aly-3	M18.7	0.00294923	0.170156	0	positive	253.806	43.1865
WBGene00006831	unc-104	C52E12.2	0.00296116	-1.74424	0	negative	8.53367	-14.8848
WBGene00006769	unc-33	Y37E11C.1	0.0029646	-0.67563	0	negative	43.4021	-29.3238
WBGene00019275	rpac-40	H43I07.2	0.00296583	0.50405	0	positive	66.165	33.3504
WBGene00007254		C01H6.4	0.00297323	-1.9541	0	negative	7.16381	-13.9988
WBGene00008388		D1086.1	0.00297956	-1.27437	0	negative	10.2818	-13.1028
WBGene00021513		Y41D4B.6	0.00300591	-4.28092	0	negative	0.136896	-0.586041
WBGene00019975	flp-34	R09A1.5	0.00300816	-3.29361	0	negative	2.32512	-7.65804
WBGene00002189	kin-1	ZK909.2	0.00301592	-0.523767	0	negative	40.0533	-20.9786
WBGene00003948	pbs-2	C47B2.4	0.00302052	0.173526	0	positive	259.277	44.9913
WBGene00013690	hprt-1	Y105E8B.5	0.00303474	-0.474507	0	negative	72.5979	-34.4482
WBGene00020230	nep-2	T05A8.4	0.00303875	-1.94859	0	negative	8.56397	-16.6877
WBGene00001480	fmo-5	H24K24.5	0.00304193	-1.35666	0	negative	8.33758	-11.3113
WBGene00021826	txl-1	Y54E10A.3	0.00304378	0.331674	0	positive	136.964	45.4273
WBGene00015903		C17E7.9	0.00305978	0.722568	0	positive	32.6884	23.6196
WBGene00020307		T07D3.4	0.00306244	-2.32915	0	negative	5.80899	-13.53
WBGene00044698		K09F5.6	0.00306788	-1.8121	0	negative	5.72527	-10.3748
WBGene00008521		F02D8.4	0.00308373	-1.11615	0	negative	19.5958	-21.8719
WBGene00007092		B0001.7	0.00308844	0.3231	0	positive	110.446	35.6852
WBGene00000788	cpz-1	F32B5.8	0.00308959	-0.0613798	0	negative	535.381	-32.8615
WBGene00003607	nhr-8	F33D4.1	0.0030965	-0.826413	0	negative	13.3067	-10.9969
WBGene00022200	fard-1	Y71H10A.2	0.00309753	-0.733948	0	negative	28.0059	-20.5549
WBGene00004925	snt-5	R12A1.2	0.0030994	-2.05069	0	negative	7.28724	-14.9439
WBGene00014251	gstk-1	ZK1320.1	0.00310094	-0.879303	0	negative	26.0243	-22.8833
WBGene00009051	nduf-6	F22D6.4	0.00310131	-0.456187	0	negative	70.8303	-32.3119
WBGene00014801		K08E5.1	0.00310531	2.53201	0	positive	5.21283	13.1989
WBGene00010967	nduo-5	MTCE.35	0.00310779	-0.0337169	0	negative	630.969	-21.2743
WBGene00015932		C17H12.6	0.0031109	-1.09276	0	negative	1.44135	-1.57504
WBGene00020098		R144.10	0.00312166	0.586913	0	positive	48.64	28.5475
WBGene00014228	mett-10	ZK1128.2	0.00313129	0.837177	0	positive	42.507	35.5859
WBGene00009973		F53C11.3	0.00315153	-0.528312	0	negative	59.2626	-31.3091
WBGene00044107		F58G6.9	0.00315816	0.903139	0	positive	15.695	14.1747
WBGene00020389		T10B5.3	0.00318172	0.416613	0	positive	99.5043	41.4548
WBGene00013394	ule-5	Y62H9A.6	0.00318378	-0.051166	0	negative	918.365	-46.9891
WBGene00015814	oatr-1	C16A3.10	0.00319025	-0.218473	0	negative	168.055	-36.7154
WBGene00008554		F07C6.3	0.00319773	-2.30283	0	negative	6.06748	-13.9724
WBGene00008214	gem-1	C49F8.2	0.00319811	-1.7612	0	negative	8.32611	-14.6639
WBGene00020322		T07F12.2	0.00320068	0.81138	0	positive	37.0341	30.0487
WBGene00016019	ascc-1	C23H3.3	0.00320154	0.773212	0	positive	43.7616	33.837
WBGene00011244		R11D1.3	0.00320592	-1.80497	0	negative	6.73596	-12.1582
WBGene00001017	dnc-1	ZK593.5	0.00321473	-0.386251	0	negative	128.923	-49.7968
WBGene00013720		Y106G6H.8	0.00321906	0.788905	0	positive	35.325	27.8681
WBGene00000804	csc-1	Y48E1B.12	0.00321942	0.366115	0	positive	100.698	36.8672
WBGene00000695	col-121	F56D5.1	0.00322051	-2.19178	0	negative	0.234085	-0.513064
WBGene00017646		F20H11.1	0.00322691	0.651515	0	positive	60.3854	39.342
WBGene00000233	avr-15	R11G10.1	0.00323859	-1.85369	0	negative	7.54446	-13.9851
WBGene00017311		F09G2.2	0.00324203	0.288367	0	positive	170.489	49.1635
WBGene00019825		R02D3.8	0.00325282	0.827554	0	positive	39.2153	32.4528
WBGene00016264		C30F12.5	0.00325405	-1.34924	0	negative	11.1608	-15.0587
WBGene00017374	ttr-41	F10G7.11	0.00326762	-0.355875	0	negative	59.9636	-21.3396
WBGene00000100	ajm-1	C25A11.4	0.00326787	-0.351867	0	negative	45.0041	-15.8354
WBGene00001572	gei-15	M03A8.4	0.00326851	-1.13897	0	negative	14.8462	-16.9094
WBGene00010637		K07F5.12	0.00327923	0.750752	0	positive	25.5062	19.1488
WBGene00018902		F55G1.6	0.00328456	0.434036	0	positive	78.2785	33.9757
WBGene00004194	prx-5	C34C6.6	0.00330723	-2.01485	0	negative	7.86105	-15.8388
WBGene00022152	atg-5	Y71G12B.12	0.00330731	0.561849	0	positive	56.5222	31.757
WBGene00001791	gst-43	Y71F9AL.5	0.00330891	-1.96547	0	negative	6.88956	-13.5412
WBGene00045357		F13A7.14	0.00331406	0.545225	0	positive	73.0274	39.8164
WBGene00012640		Y38H8A.7	0.00332553	1.1592	0	positive	13.5026	15.6522
WBGene00013189		Y54E2A.4	0.00334172	-0.440208	0	negative	80.1185	-35.2688
WBGene00001230	eif-3.G	F22B5.2	0.00336507	0.308963	0	positive	128.276	39.6324
WBGene00012834		Y43F8C.13	0.00336582	-0.850622	0	negative	28.0395	-23.851
WBGene00006648	ttb-1	W03F9.5	0.00337775	0.613657	0	positive	62.9365	38.6214
WBGene00000899	daf-3	F25E2.5	0.0033803	-0.863119	0	negative	23.9656	-20.6851
WBGene00013208		Y54G9A.5	0.00338371	0.4127	0	positive	79.7891	32.9289
WBGene00018270	eas-1	F41C3.4	0.00338578	0.551338	0	positive	70.3359	38.7789
WBGene00018925		F56A11.5	0.00338763	0.44016	0	positive	81.0055	35.6554
WBGene00013079	ttr-26	Y51A2D.11	0.0033912	-1.05738	0	negative	4.12469	-4.36135
WBGene00002059	ife-1	F53A2.6	0.00339577	0.173482	0	positive	193.661	33.5967
WBGene00003219	mes-1	F54F7.5	0.0033962	0.662959	0	positive	33.9075	22.4793
WBGene00009243		F29C6.1	0.0034081	-0.779932	0	negative	23.8442	-18.5969
WBGene00004206	pst-1	M03F8.2	0.00340886	0.594829	0	positive	50.3148	29.9287
WBGene00020264	acl-8	T05H4.1	0.00341088	0.470371	0	positive	87.8881	41.3401
WBGene00008735		F13D2.1	0.00341338	-1.66065	0	negative	9.07827	-15.0758
WBGene00003965	pdk-1	H42K12.1	0.00341817	0.709083	0	positive	39.8029	28.2236
WBGene00011331		T01E8.1	0.0034212	-1.92724	0	negative	7.77061	-14.9759
WBGene00012220		W03C9.2	0.0034456	0.456132	0	positive	99.1146	45.2093
WBGene00008133	efsc-1	C47B2.7	0.00345359	0.909138	0	positive	23.9569	21.7801
WBGene00017667	ttr-37	F21E9.3	0.00346281	-2.47691	0	negative	4.20326	-10.4111
WBGene00019609		K10B3.1	0.00348619	-2.08796	0	negative	5.58305	-11.6572
WBGene00014006		ZK596.1	0.00353746	-0.535192	0	negative	23.5794	-12.6195
WBGene00000803	csb-1	F53H4.1	0.00354123	0.963446	0	positive	28.9313	27.8737
WBGene00015312		C01G8.1	0.00354299	0.148569	0	positive	376.538	55.9418
WBGene00044493		Y54G2A.50	0.00355061	-1.43506	0	negative	14.2012	-20.3796
WBGene00016311	efr-3	C32D5.3	0.00355122	0.310109	0	positive	152.448	47.2755
WBGene00004860	sma-6	C32D5.2	0.00356397	-1.67661	0	negative	9.23386	-15.4816
WBGene00013874	cest-2.2	ZC376.2	0.00357631	-0.755166	0	negative	23.8236	-17.9908
WBGene00004062	pmp-5	T10H9.5	0.00357882	-0.177519	0	negative	136.767	-24.2787
WBGene00010555		K04C1.5	0.00358728	0.367626	0	positive	93.2316	34.2744
WBGene00017919		F29B9.1	0.00360271	1.20396	0	positive	23.7754	28.6247
WBGene00016071		C24H12.1	0.00361682	-2.83018	0	negative	1.22483	-3.4665
WBGene00001404	fbp-1	K07A3.1	0.00361985	-0.263247	0	negative	172.483	-45.4056
WBGene00015037		B0212.3	0.00362128	-0.567033	0	negative	31.8902	-18.0828
WBGene00011050	agl-1	R06A4.8	0.00362384	-0.432358	0	negative	82.3735	-35.6149
WBGene00021657		Y48G1A.1	0.0036249	1.06416	0	positive	22.4767	23.9188
WBGene00016144	mmab-1	C26E6.11	0.00362899	0.639985	0	positive	46.8817	30.0036
WBGene00021959		Y57E12AL.6	0.00363845	0.303219	0	positive	123.913	37.5727
WBGene00006635	tsp-9	C25G6.2	0.00365109	-1.79086	0	negative	8.07523	-14.4616
WBGene00004461	rpn-5	F10G7.8	0.00365804	0.103343	0	positive	348.297	35.9941
WBGene00006919	vha-10	F46F11.5	0.00367763	-0.179878	0	negative	217.345	-39.0954
WBGene00019767	rpa-2	M04F3.1	0.00367933	0.158711	0	positive	256.96	40.7822
WBGene00013381	cyp-31A5	Y62E10A.15	0.00368351	0.412759	0	positive	72.8576	30.0726
WBGene00007771		C27C12.1	0.00369711	0.660332	0	positive	32.5847	21.5167
WBGene00001761	gst-13	T26C5.1	0.00370064	-0.654162	0	negative	28.7832	-18.8289
WBGene00022281	abtm-1	Y74C10AR.3	0.00373543	0.582612	0	positive	49.1352	28.6268
WBGene00010488	endu-1	K02A11.3	0.00375366	-1.53187	0	negative	11.9808	-18.3529
WBGene00012354	cox-4	W09C5.8	0.00376169	-0.130589	0	negative	365.523	-47.7333
WBGene00044322	tag-280	F15A4.12	0.00376565	1.33213	0	positive	12.5891	16.7703
WBGene00009773	lipl-2	F46B6.8	0.00376897	-4.18872	0	negative	0.3002	-1.25745
WBGene00016048		C24B9.3	0.00377845	-0.388035	0	negative	62.2391	-24.1509
WBGene00007561	ccm-3	C14A4.11	0.00378029	0.452318	0	positive	81.877	37.0345
WBGene00004959	spe-5	Y110A7A.12	0.00378711	-1.64001	0	negative	10.7088	-17.5625
WBGene00006882	vab-19	T22D2.1	0.00378804	-1.71985	0	negative	6.99527	-12.0308
WBGene00003163	mdl-1	R03E9.1	0.00378937	-0.961403	0	negative	11.9295	-11.4691
WBGene00000920	daf-28	Y116F11B.1	0.00378958	-2.10148	0	negative	5.14695	-10.8162
WBGene00001819	haf-9	ZK484.2	0.0037909	-0.930409	0	negative	20.6266	-19.1911
[truncated: 6,825 more rows]

## Sheet: ELOAssociationAnalysis
gene	PVal_GeneExp	UpDown	Significant	AssocDirection	averagecpm	CoeffCPMNorm
WBGene00017201	6.63e-08	0.165854	1	positive	11.0932	1.83985
WBGene00020091	3.76e-07	-0.0149798	1	negative	346.036	-5.18354
WBGene00011573	7.43e-07	0.153784	1	positive	19.0006	2.922
WBGene00004058	8.71e-07	-0.137711	1	negative	20.3972	-2.80891
WBGene00011044	1.24e-06	-0.111614	1	negative	65.5938	-7.32117
WBGene00009349	1.65e-06	0.264642	1	positive	6.20748	1.64276
WBGene00000183	3.98e-06	-0.0160476	1	negative	472.113	-7.57627
WBGene00013212	4.03e-06	0.0991042	1	positive	32.589	3.2297
WBGene00006593	4.63e-06	-0.0522002	1	negative	84.3028	-4.40063
WBGene00021813	4.82e-06	0.0832394	1	positive	63.1745	5.25861
WBGene00019373	5.38e-06	0.266824	1	positive	7.99254	2.13261
WBGene00012982	5.93e-06	-0.0683755	0	negative	92.8045	-6.34556
WBGene00022855	6.08e-06	0.0598902	0	positive	67.8781	4.06524
WBGene00019017	6.12e-06	-0.0147952	0	negative	254.01	-3.75812
WBGene00010268	6.31e-06	-0.483824	0	negative	2.63743	-1.27605
WBGene00007332	7.38e-06	-0.019101	0	negative	385.623	-7.36577
WBGene00012802	8.89e-06	-0.0585608	0	negative	60.5304	-3.54471
WBGene00017874	9.38e-06	0.0508576	0	positive	80.1697	4.07724
WBGene00013225	9.6e-06	0.0580433	0	positive	74.4018	4.31853
WBGene00011488	1.06e-05	0.073511	0	positive	56.3261	4.14059
WBGene00007312	1.11e-05	0.133057	0	positive	18.601	2.47498
WBGene00013996	1.16e-05	-0.247303	0	negative	5.67174	-1.40263
WBGene00016987	1.16e-05	-0.0837608	0	negative	50.9886	-4.27084
WBGene00020989	1.19e-05	-0.259006	0	negative	5.91865	-1.53296
WBGene00015849	1.21e-05	0.156901	0	positive	17.3524	2.72261
WBGene00021810	1.27e-05	-0.0785006	0	negative	60.2044	-4.72609
WBGene00012977	1.35e-05	0.122832	0	positive	34.1584	4.19574
WBGene00003834	1.39e-05	0.0539831	0	positive	85.9441	4.63952
WBGene00017123	1.44e-05	0.0769897	0	positive	34.6579	2.6683
WBGene00009787	1.47e-05	-0.0151692	0	negative	159.773	-2.42362
WBGene00010048	1.59e-05	0.089108	0	positive	62.7547	5.59195
WBGene00012359	1.62e-05	-0.0470471	0	negative	127.624	-6.00433
WBGene00007807	1.65e-05	0.0572292	0	positive	36.3582	2.08075
WBGene00009992	2.17e-05	0.0549928	0	positive	128.331	7.05729
WBGene00000079	2.18e-05	0.0782378	0	positive	43.9534	3.43881
WBGene00013808	2.28e-05	0.056519	0	positive	79.2164	4.47724
WBGene00001851	2.51e-05	-0.0415927	0	negative	125.681	-5.22741
WBGene00018602	2.58e-05	0.0252149	0	positive	101.14	2.55024
WBGene00016419	2.74e-05	0.0707385	0	positive	49.7663	3.52039
WBGene00013445	2.85e-05	0.138172	0	positive	24.0466	3.32257
WBGene00000731	3.06e-05	-0.187783	0	negative	7.67434	-1.44111
WBGene00012337	3.34e-05	0.0202093	0	positive	125.008	2.52632
WBGene00001993	5.49e-05	0.0196856	0	positive	184.654	3.63502
WBGene00018700	5.57e-05	-0.0145877	0	negative	347.983	-5.07628
WBGene00001476	5.77e-05	-0.354793	0	negative	3.24897	-1.15271
WBGene00014251	5.98e-05	0.11877	0	positive	26.0243	3.09091
WBGene00021714	6.12e-05	0.110275	0	positive	33.4915	3.69327
WBGene00013552	6.32e-05	0.0540202	0	positive	101.035	5.45795
WBGene00015853	6.51e-05	0.0749332	0	positive	47.2774	3.54264
WBGene00021043	7.01e-05	0.0238586	0	positive	135.075	3.2227
WBGene00010681	7.37e-05	-0.0302401	0	negative	133.762	-4.04497
WBGene00012559	8e-05	0.0698393	0	positive	48.3312	3.37542
WBGene00007226	8.67e-05	-0.0474023	0	negative	64.5272	-3.05874
WBGene00018611	9.42e-05	0.0422522	0	positive	61.4331	2.59568
WBGene00012136	9.97e-05	-0.0936718	0	negative	26.4189	-2.4747
WBGene00001236	0.000101434	0.0758227	0	positive	26.6444	2.02025
WBGene00008741	0.000102962	-0.00925432	0	negative	407.934	-3.77515
WBGene00015061	0.000108091	0.0656275	0	positive	52.8136	3.46602
WBGene00022382	0.000108092	0.0349727	0	positive	33.9275	1.18654
WBGene00009532	0.000108444	-0.0624646	0	negative	30.1284	-1.88196
WBGene00008944	0.000108872	0.0547409	0	positive	23.2097	1.27052
WBGene00008440	0.000110785	-0.0333581	0	negative	175.172	-5.8434
WBGene00008411	0.000130253	0.0349743	0	positive	141.015	4.9319
WBGene00007959	0.000132819	-0.126356	0	negative	16.2897	-2.0583
WBGene00016195	0.000144327	-0.0319426	0	negative	170.767	-5.45475
WBGene00004136	0.000148182	-0.0352711	0	negative	216.677	-7.64244
WBGene00019947	0.000149204	-0.00488754	0	negative	866.595	-4.23552
WBGene00010966	0.000150219	-0.0226985	0	negative	58.0659	-1.31801
WBGene00006911	0.00015047	-0.00952852	0	negative	580.409	-5.53044
WBGene00017265	0.000156412	0.304752	0	positive	2.93609	0.89478
WBGene00021628	0.000189428	-0.0255326	0	negative	156.505	-3.99598
WBGene00022077	0.000195668	-0.0893767	0	negative	42.0095	-3.75467
WBGene00020909	0.000198624	0.0357597	0	positive	74.5939	2.66746
WBGene00007964	0.000198979	0.0843284	0	positive	20.1519	1.69937
WBGene00011059	0.00020106	-0.0257313	0	negative	102.533	-2.63832
WBGene00013529	0.0002133	-0.100309	0	negative	45.9251	-4.60669
WBGene00012700	0.000215008	0.0662633	0	positive	63.8881	4.23344
WBGene00010002	0.000218556	0.0570403	0	positive	95.5962	5.45284
WBGene00022413	0.000219154	0.117759	0	positive	20.4853	2.41232
WBGene00001239	0.000221549	-0.0196148	0	negative	318.386	-6.24509
WBGene00015091	0.000223238	-0.0457611	0	negative	110.294	-5.04719
WBGene00013606	0.000225381	0.025254	0	positive	199.209	5.03082
WBGene00008041	0.000230995	0.0684236	0	positive	45.9355	3.14307
WBGene00045483	0.000248727	0.0443269	0	positive	97.6782	4.32977
WBGene00006460	0.000279736	-0.0153217	0	negative	322.04	-4.93421
WBGene00021934	0.000282369	0.0176248	0	positive	311.53	5.49066
WBGene00011312	0.000290338	-0.0234432	0	negative	267.995	-6.28266
WBGene00022169	0.000301863	-0.0609164	0	negative	79.3664	-4.83471
WBGene00001999	0.000315235	0.0109607	0	positive	401.201	4.39743
WBGene00006710	0.000323759	0.0940612	0	positive	37.8608	3.56123
WBGene00002134	0.000324437	-0.0766692	0	negative	41.7643	-3.20204
WBGene00006436	0.00034455	-0.0112258	0	negative	68.0971	-0.764445
WBGene00019362	0.000349761	0.100974	0	positive	25.8317	2.60833
WBGene00018702	0.000351665	0.225333	0	positive	5.9235	1.33476
WBGene00022367	0.000351778	0.252507	0	positive	7.26741	1.83507
WBGene00019141	0.000354946	0.0954983	0	positive	33.293	3.17943
WBGene00000067	0.000358354	-0.00886499	0	negative	364.37	-3.23014
WBGene00021698	0.000363039	0.103579	0	positive	30.5313	3.16239
WBGene00003639	0.000364538	-0.033409	0	negative	109.946	-3.67319
WBGene00019126	0.000365812	-0.0502352	0	negative	83.1808	-4.17861
WBGene00022014	0.000373355	-0.0912845	0	negative	41.8166	-3.81721
WBGene00008777	0.000377554	0.158995	0	positive	10.4108	1.65527
WBGene00001678	0.000377792	0.0597457	0	positive	50.9854	3.04616
WBGene00003916	0.000388157	-0.0200936	0	negative	166.477	-3.34512
WBGene00000800	0.000400118	0.0323634	0	positive	194.661	6.2999
WBGene00012897	0.000407732	-0.0485302	0	negative	92.8619	-4.50661
WBGene00017686	0.00044551	0.0182821	0	positive	229.627	4.19806
WBGene00021443	0.000449986	0.0515474	0	positive	91.7499	4.72947
WBGene00015658	0.000474722	0.0671244	0	positive	59.4205	3.98856
WBGene00003826	0.000489782	0.0285547	0	positive	182.435	5.20937
WBGene00007282	0.000499773	0.0535566	0	positive	40.9099	2.191
WBGene00010230	0.000535297	0.0569712	0	positive	57.5846	3.28066
WBGene00012983	0.000571678	0.0442186	0	positive	161.308	7.13282
WBGene00006604	0.000574174	-0.0361912	0	negative	65.8248	-2.38228
WBGene00017054	0.000578439	-0.310521	0	negative	4.30672	-1.33733
WBGene00012389	0.000578679	0.0614995	0	positive	44.5939	2.7425
WBGene00007217	0.000581211	0.0536535	0	positive	88.4548	4.74591
WBGene00003014	0.000598412	0.0543688	0	positive	73.9332	4.01966
WBGene00000835	0.000644775	0.0512718	0	positive	47.3913	2.42984
WBGene00007136	0.000655365	0.0577255	0	positive	33.4058	1.92837
WBGene00007184	0.000671418	0.0300853	0	positive	176.801	5.31911
WBGene00017490	0.000690183	0.354939	0	positive	1.07544	0.381714
WBGene00001371	0.000691797	0.0922558	0	positive	31.2122	2.8795
WBGene00015403	0.00069346	-0.158922	0	negative	9.99115	-1.58782
WBGene00007857	0.000694615	-0.103716	0	negative	17.6433	-1.8299
WBGene00000869	0.000715583	0.0192047	0	positive	300.286	5.7669
WBGene00021281	0.00072105	-0.0220371	0	negative	122.629	-2.70239
WBGene00011045	0.000732086	0.0384891	0	positive	77.2451	2.97309
WBGene00012719	0.000734838	0.104424	0	positive	32.3074	3.37365
WBGene00001564	0.000749047	0.00973793	0	positive	240.201	2.33906
WBGene00003085	0.000828638	0.0160618	0	positive	386.654	6.21037
WBGene00008165	0.00083424	-0.0333671	0	negative	131.872	-4.4002
WBGene00001243	0.000834446	0.0218803	0	positive	139.159	3.04484
WBGene00020012	0.00083947	0.219926	0	positive	7.54977	1.66039
WBGene00012462	0.000844828	0.166409	0	positive	10.1071	1.68192
WBGene00015056	0.000850867	-0.153031	0	negative	12.7801	-1.95576
WBGene00021316	0.000862494	-0.0256962	0	negative	80.1521	-2.0596
WBGene00044067	0.000867337	-0.0132403	0	negative	149.159	-1.9749
WBGene00004723	0.000869423	-0.0322118	0	negative	149.301	-4.80926
WBGene00011094	0.000894487	-0.158867	0	negative	12.6087	-2.00312
WBGene00010834	0.000898402	-0.0508204	0	negative	55.7254	-2.83199
WBGene00018523	0.00090466	0.196499	0	positive	6.80332	1.33685
WBGene00013176	0.000909396	0.0740338	0	positive	40.6482	3.00934
WBGene00013220	0.000959241	0.240864	0	positive	4.97251	1.1977
WBGene00001501	0.000974124	-0.0245216	0	negative	123.393	-3.02578
WBGene00010657	0.0010089	-0.144757	0	negative	13.4781	-1.95105
WBGene00013025	0.00106523	-0.0107602	0	negative	527.424	-5.6752
WBGene00219275	0.00108213	0.0810363	0	positive	28.8173	2.33525
WBGene00009542	0.00109836	0.0232327	0	positive	222.025	5.15824
WBGene00003678	0.00110258	-0.140878	0	negative	14.9561	-2.10699
WBGene00014113	0.00118161	0.0334068	0	positive	125.103	4.17928
WBGene00017385	0.00118604	-0.0219566	0	negative	110.641	-2.42929
WBGene00009112	0.00121874	-0.0259494	0	negative	206.612	-5.36145
WBGene00017881	0.00123453	-0.0103126	0	negative	272.9	-2.8143
WBGene00012998	0.00123517	0.0968444	0	positive	23.9869	2.323
WBGene00022075	0.00124363	0.0435763	0	positive	46.2483	2.01533
WBGene00016458	0.00125123	0.0958193	0	positive	10.8096	1.03577
WBGene00021607	0.00126145	0.140125	0	positive	9.88269	1.38482
WBGene00004453	0.00127386	0.00397452	0	positive	400.387	1.59134
WBGene00020029	0.00128097	-0.177997	0	negative	7.60042	-1.35285
WBGene00019164	0.00129758	-0.103105	0	negative	21.2081	-2.18665
WBGene00017244	0.00129808	0.0505431	0	positive	71.8967	3.63388
WBGene00012118	0.00130546	0.12161	0	positive	7.46425	0.907729
WBGene00008976	0.00132138	-0.0459228	0	negative	7.88743	-0.362213
WBGene00021123	0.00135978	-0.150471	0	negative	15.1161	-2.27453
WBGene00303009	0.00136209	0.147601	0	positive	15.71	2.3188
WBGene00019354	0.00137673	-0.0170337	0	negative	178.389	-3.03862
WBGene00009007	0.00137816	-0.0256382	0	negative	221.997	-5.69159
WBGene00007534	0.00137921	0.0251037	0	positive	184.536	4.63256
WBGene00001404	0.00138157	-0.0297108	0	negative	172.483	-5.1246
WBGene00003012	0.00138638	-0.0213699	0	negative	133.129	-2.84495
WBGene00022069	0.00138643	-0.0110726	0	negative	419	-4.63941
WBGene00008684	0.00139187	-0.0171409	0	negative	165.608	-2.83866
WBGene00012423	0.00140956	-0.0443594	0	negative	91.315	-4.05068
WBGene00013308	0.00144092	-0.0937458	0	negative	30.906	-2.8973
WBGene00017811	0.00144751	0.0569364	0	positive	45.7662	2.60577
WBGene00018758	0.00145596	0.148313	0	positive	12.3041	1.82486
WBGene00002272	0.0014586	-0.0276647	0	negative	105.662	-2.9231
WBGene00019521	0.00154309	-0.0572115	0	negative	33.8697	-1.93774
WBGene00219451	0.00154826	-0.0570433	0	negative	42.2017	-2.40732
WBGene00006404	0.00156783	-0.0536296	0	negative	39.2157	-2.10312
WBGene00009770	0.0015776	-0.0216642	0	negative	191.916	-4.1577
WBGene00006700	0.00158575	0.0306517	0	positive	132.02	4.04664
WBGene00077701	0.00159277	0.230819	0	positive	5.4658	1.26161
WBGene00019725	0.00160293	0.0834174	0	positive	30.5972	2.55234
WBGene00045192	0.0016214	0.0187297	0	positive	148.015	2.77227
WBGene00007517	0.00162359	-0.166684	0	negative	6.41605	-1.06945
WBGene00008968	0.00163812	0.0341921	0	positive	98.2446	3.35919
WBGene00008505	0.00164623	-0.00480689	0	negative	1080.01	-5.1915
WBGene00006476	0.00165916	-0.119496	0	negative	12.3481	-1.47555
WBGene00006769	0.00168992	0.0737975	0	positive	43.4021	3.20297
WBGene00015823	0.00172846	-0.0458054	0	negative	40.9468	-1.87558
WBGene00010790	0.00173271	0.0518785	0	positive	23.6237	1.22556
WBGene00022388	0.00176567	0.0391699	0	positive	79.4669	3.11271
WBGene00016653	0.00176661	0.0163015	0	positive	238.397	3.88623
WBGene00011194	0.00177163	0.0963365	0	positive	34.5911	3.33238
WBGene00003794	0.00179554	-0.0126258	0	negative	238.837	-3.0155
WBGene00010304	0.00179655	-0.049769	0	negative	65.935	-3.28152
WBGene00016860	0.00182861	-0.187733	0	negative	9.24025	-1.7347
WBGene00015756	0.00191202	-0.0790006	0	negative	26.5824	-2.10002
WBGene00009880	0.00192417	0.0156347	0	positive	190.83	2.98357
WBGene00006840	0.0019375	0.0338196	0	positive	96.2374	3.25471
WBGene00011912	0.00194029	0.0451725	0	positive	87.1661	3.93751
WBGene00018718	0.00198254	0.124326	0	positive	16.1624	2.00942
WBGene00002021	0.0019892	0.0804128	0	positive	17.9862	1.44632
WBGene00086546	0.00200692	0.055501	0	positive	61.0171	3.38651
WBGene00022793	0.00207472	-0.0201562	0	negative	244.852	-4.9353
WBGene00302991	0.0020815	0.250411	0	positive	5.44873	1.36442
WBGene00022765	0.00210186	-0.0079192	0	negative	180.683	-1.43087
WBGene00014176	0.00211526	-0.0613226	0	negative	71.1101	-4.36065
WBGene00012903	0.00216031	0.0428394	0	positive	89.9614	3.85389
WBGene00009142	0.00216155	-0.101237	0	negative	17.2898	-1.75036
WBGene00022493	0.00217648	0.081137	0	positive	36.0064	2.92145
WBGene00022127	0.00219512	-0.00777863	0	negative	475.562	-3.69922
WBGene00004454	0.00221411	0.00310996	0	positive	862.167	2.6813
WBGene00018290	0.00223437	0.0534567	0	positive	73.9803	3.95474
WBGene00019157	0.00224166	0.0420034	0	positive	60.2645	2.53131
WBGene00013213	0.00232186	0.0415958	0	positive	85.3241	3.54913
WBGene00005015	0.00232489	0.0263813	0	positive	163.757	4.32011
WBGene00022149	0.0023277	-0.0387115	0	negative	104.01	-4.02639
WBGene00010993	0.00232938	-0.0412859	0	negative	107.988	-4.45837
WBGene00006959	0.00232966	-0.00774584	0	negative	323.086	-2.50257
WBGene00013160	0.0023727	0.049073	0	positive	76.4366	3.75097
WBGene00008767	0.002392	-0.0641549	0	negative	56.1662	-3.60334
WBGene00044438	0.00239881	0.12616	0	positive	14.0817	1.77655
WBGene00000963	0.00241369	-0.15608	0	negative	10.533	-1.64399
WBGene00006516	0.00246714	0.0414251	0	positive	87.1244	3.60914
WBGene00011875	0.00247304	0.0816882	0	positive	26.1626	2.13718
WBGene00011664	0.002475	-0.0815023	0	negative	52.9801	-4.318
WBGene00001390	0.00248731	-0.0217922	0	negative	148.532	-3.23683
WBGene00001983	0.00249746	-0.0211445	0	negative	164.529	-3.47889
WBGene00003577	0.00254979	-0.0722383	0	negative	33.4034	-2.41301
WBGene00009126	0.00255918	-0.0134268	0	negative	491.786	-6.60311
WBGene00007581	0.00258511	0.0718634	0	positive	45.6583	3.28116
WBGene00013235	0.00259055	0.0527162	0	positive	51.1194	2.69482
WBGene00021348	0.00259124	0.0369299	0	positive	73.9811	2.73211
WBGene00022046	0.00260913	0.0202617	0	positive	94.2538	1.90974
WBGene00015245	0.00263612	0.0590899	0	positive	45.8836	2.71126
WBGene00011410	0.00264528	0.0254121	0	positive	235.252	5.97824
WBGene00013339	0.0026798	0.0642691	0	positive	56.5849	3.63666
WBGene00012324	0.00270239	-0.109586	0	negative	21.8632	-2.3959
WBGene00000496	0.00270588	0.00921479	0	positive	520.159	4.79316
WBGene00006699	0.0027082	0.00854851	0	positive	657.467	5.62036
WBGene00001713	0.00271278	-0.0849668	0	negative	20.38	-1.73162
WBGene00004892	0.00272037	-0.0259701	0	negative	123.979	-3.21976
WBGene00016739	0.0027231	-0.011125	0	negative	285.978	-3.1815
WBGene00002064	0.00272934	0.00660469	0	positive	349.53	2.30853
WBGene00001399	0.0027298	-0.00833906	0	negative	137.73	-1.14854
WBGene00044083	0.00274846	0.116465	0	positive	10.1307	1.17987
WBGene00018270	0.00279756	-0.057745	0	negative	70.3359	-4.06155
WBGene00019617	0.0028251	-0.0255961	0	negative	118.799	-3.04078
WBGene00303023	0.00283851	0.147996	0	positive	7.79775	1.15404
WBGene00021536	0.00284319	-0.0313253	0	negative	100.543	-3.14953
WBGene00045078	0.00284945	0.109384	0	positive	17.437	1.90733
WBGene00006066	0.00286038	0.0963118	0	positive	22.2859	2.1464
WBGene00006997	0.00289259	0.028537	0	positive	166.531	4.75231
WBGene00002997	0.00295841	-0.117967	0	negative	22.1907	-2.61777
WBGene00016811	0.00297512	0.0650771	0	positive	54.8797	3.57141
WBGene00022253	0.00300222	0.0337303	0	positive	135.393	4.56685
WBGene00004266	0.00302396	-0.00997997	0	negative	317.814	-3.17177
WBGene00013353	0.00302746	0.0793957	0	positive	24.7386	1.96414
WBGene00010407	0.00302873	-0.109874	0	negative	22.5257	-2.47498
WBGene00011201	0.00303687	-0.107331	0	negative	26.1244	-2.80397
WBGene00020374	0.00304463	0.0713612	0	positive	27.5549	1.96635
WBGene00020600	0.00308442	0.0439236	0	positive	58.5701	2.57261
WBGene00009469	0.00313099	0.0261587	0	positive	41.2912	1.08012
WBGene00021486	0.00314631	0.00465072	0	positive	563.823	2.62218
WBGene00004147	0.00319234	-0.00489354	0	negative	451.901	-2.2114
WBGene00018422	0.00320334	0.0909356	0	positive	18.7159	1.70194
WBGene00011561	0.00320711	0.00909218	0	positive	339.97	3.09107
WBGene00013018	0.0032723	0.0505793	0	positive	71.6638	3.6247
WBGene00003636	0.00329302	-0.0598771	0	negative	48.9193	-2.92914
WBGene00016003	0.00329901	-0.237636	0	negative	3.67846	-0.874133
WBGene00017659	0.00331761	0.0464328	0	positive	39.5828	1.83794
WBGene00000929	0.00338444	0.0422609	0	positive	37.2253	1.57318
WBGene00007122	0.00340355	0.0277545	0	positive	95.8896	2.66137
WBGene00021247	0.0035066	0.117837	0	positive	14.1282	1.66483
WBGene00004336	0.0035075	0.0198895	0	positive	335.443	6.67181
WBGene00017724	0.00351899	-0.139424	0	negative	13.8849	-1.93588
WBGene00013805	0.00356239	-0.0854607	0	negative	36.6255	-3.13004
WBGene00001758	0.0035639	-0.110342	0	negative	11.6045	-1.28047
WBGene00022139	0.0035932	0.0404408	0	positive	34.2291	1.38425
WBGene00006503	0.00360741	0.0430923	0	positive	75.3189	3.24567
WBGene00021841	0.00361335	0.0358383	0	positive	78.6244	2.81777
WBGene00003602	0.00366445	0.120698	0	positive	10.6282	1.2828
WBGene00016258	0.00368616	-0.0181753	0	negative	242.32	-4.40425
WBGene00002850	0.00368872	0.0292325	0	positive	128.443	3.7547
WBGene00003161	0.00370795	-0.0295436	0	negative	144.924	-4.28156
WBGene00015943	0.00371496	-0.0110498	0	negative	300.099	-3.31603
WBGene00006921	0.00372412	-0.0165681	0	negative	359.303	-5.95297
WBGene00022029	0.00373142	0.0254621	0	positive	116.698	2.97139
WBGene00007030	0.0037381	-0.0156042	0	negative	194.833	-3.04021
WBGene00000838	0.00374078	0.0212212	0	positive	229.572	4.8718
WBGene00010134	0.00375118	0.207817	0	positive	6.7317	1.39896
WBGene00013803	0.00375633	0.0459444	0	positive	60.8071	2.79375
WBGene00019606	0.00376604	-0.00964149	0	negative	563.006	-5.42821
WBGene00000444	0.003815	-0.0780951	0	negative	34.1635	-2.668
WBGene00021554	0.00381641	-0.0215559	0	negative	149.003	-3.21188
WBGene00020181	0.00381922	0.0196618	0	positive	233.282	4.58674
WBGene00009266	0.00382474	0.089682	0	positive	19.8857	1.78339
WBGene00015011	0.00386888	0.0284735	0	positive	145.47	4.14203
WBGene00014036	0.00388887	0.0367599	0	positive	101.586	3.7343
WBGene00013260	0.00389694	0.0484729	0	positive	61.2075	2.9669
WBGene00011801	0.00389696	-0.0553287	0	negative	11.3578	-0.628414
WBGene00013520	0.00390277	0.24779	0	positive	5.21519	1.29227
WBGene00008991	0.004005	0.183405	0	positive	5.29169	0.97052
WBGene00017591	0.00400883	-0.0171895	0	negative	149.484	-2.56955
WBGene00022035	0.00400918	-0.106855	0	negative	27.3104	-2.91826
WBGene00000984	0.00404962	0.122093	0	positive	10.8856	1.32905
WBGene00022092	0.00405334	0.0368819	0	positive	85.1827	3.1417
WBGene00015312	0.00408943	-0.0151047	0	negative	376.538	-5.68751
WBGene00045433	0.00409241	-0.0941837	0	negative	24.9327	-2.34825
WBGene00000868	0.00410702	-0.00368512	0	negative	1258	-4.63586
WBGene00015733	0.00411783	-0.120363	0	negative	17.593	-2.11755
WBGene00012316	0.00413299	0.0293373	0	positive	95.5512	2.80322
WBGene00017730	0.00413798	-0.0636838	0	negative	27.2754	-1.737
WBGene00001175	0.00415833	-0.147855	0	negative	9.51053	-1.40618
WBGene00021638	0.00427082	-0.0563392	0	negative	43.2624	-2.43737
WBGene00019946	0.00427661	-0.0386623	0	negative	120.472	-4.65774
WBGene00001058	0.00432233	0.0203024	0	positive	229.424	4.65786
WBGene00013477	0.00434643	0.100593	0	positive	16.8202	1.69199
WBGene00004016	0.00438022	0.0514622	0	positive	39.1663	2.01558
WBGene00004875	0.00439136	0.0245145	0	positive	108.229	2.65317
WBGene00017158	0.00439746	0.0594089	0	positive	54.5755	3.24227
WBGene00003607	0.00442082	0.0794915	0	positive	13.3067	1.05777
WBGene00019713	0.00443288	-0.0224899	0	negative	239.246	-5.3806
WBGene00015641	0.00444542	0.098209	0	positive	20.9461	2.05709
WBGene00023421	0.00453203	-0.045612	0	negative	71.8122	-3.2755
WBGene00013325	0.00453291	-0.095669	0	negative	28.6279	-2.7388
WBGene00020446	0.00453475	0.139613	0	positive	13.1804	1.84015
WBGene00022703	0.00457762	-0.0248504	0	negative	209.813	-5.21394
WBGene00003992	0.00474041	0.0103008	0	positive	397.03	4.08974
WBGene00007107	0.00482838	0.0382201	0	positive	71.1693	2.7201
WBGene00000976	0.00482869	0.0340464	0	positive	125.485	4.27231
WBGene00010720	0.00488093	0.0626319	0	positive	53.0804	3.32452
WBGene00020208	0.00494775	0.0366898	0	positive	57.4378	2.10738
WBGene00022463	0.00499036	0.0348172	0	positive	85.6662	2.98266
WBGene00013123	0.00500952	0.0664158	0	positive	69.2726	4.60079
WBGene00007880	0.00502474	0.0413137	0	positive	82.5824	3.41178
WBGene00009925	0.00503889	-0.0301357	0	negative	68.8699	-2.07544
WBGene00303026	0.00506165	0.185069	0	positive	6.88483	1.27417
WBGene00021753	0.00508998	0.0336269	0	positive	81.7344	2.74847
WBGene00000519	0.00509867	0.0522236	0	positive	85.4559	4.46282
WBGene00021771	0.00521295	-0.0545425	0	negative	67.7174	-3.69348
WBGene00003224	0.00523592	0.0546238	0	positive	53.6763	2.932
WBGene00006351	0.00530261	0.0264723	0	positive	105.094	2.78208
WBGene00003918	0.0054314	0.0183513	0	positive	238.114	4.3697
WBGene00006931	0.00544746	-0.0309729	0	negative	106.41	-3.29582
WBGene00000815	0.00545597	-0.0345342	0	negative	125.675	-4.3401
WBGene00020038	0.00548435	-0.0356877	0	negative	95.6709	-3.41427
WBGene00007283	0.00549671	0.0633162	0	positive	20.0821	1.27153
WBGene00011733	0.00560238	0.158269	0	positive	5.96527	0.944114
WBGene00016970	0.00562293	-0.0757573	0	negative	27.9752	-2.11933
WBGene00044329	0.00567368	-0.0318584	0	negative	129.643	-4.13021
WBGene00008362	0.0056839	0.037463	0	positive	109.057	4.08562
WBGene00016705	0.00569165	-0.118123	0	negative	17.3459	-2.04895
WBGene00000515	0.00574134	-0.0769193	0	negative	25.8813	-1.99077
WBGene00012002	0.00574742	-0.0459263	0	negative	89.5158	-4.11113
WBGene00001019	0.0057938	-0.0346613	0	negative	98.5195	-3.41481
WBGene00017004	0.00581914	-0.0209846	0	negative	158.723	-3.33075
WBGene00004736	0.0058394	0.00909376	0	positive	569.838	5.18196
WBGene00302995	0.0058912	0.147358	0	positive	8.61444	1.26941
WBGene00000425	0.0058965	0.216685	0	positive	2.21527	0.480015
WBGene00019241	0.00595117	0.0649609	0	positive	47.8516	3.10849
WBGene00004333	0.00598633	0.0401034	0	positive	110.731	4.44067
WBGene00017241	0.00598731	0.0549845	0	positive	41.8749	2.30247
WBGene00017951	0.00601767	0.0376483	0	positive	128.299	4.83025
WBGene00018294	0.00602628	-0.0130122	0	negative	214.832	-2.79543
WBGene00006958	0.00611383	0.0455137	0	positive	80.1088	3.64605
WBGene00003805	0.00622755	-0.0356313	0	negative	146.704	-5.22725
WBGene00014253	0.00623059	-0.027355	0	negative	95.7824	-2.62012
WBGene00021752	0.00626404	0.0616567	0	positive	36.8605	2.27269
WBGene00016698	0.00630071	-0.136961	0	negative	3.34931	-0.458724
WBGene00001510	0.00637716	-0.0173166	0	negative	135.127	-2.33994
WBGene00017968	0.0064257	-0.113225	0	negative	16.6601	-1.88633
WBGene00017852	0.0064317	-0.0173377	0	negative	174.032	-3.01733
WBGene00017239	0.00644761	0.160536	0	positive	8.39935	1.3484
WBGene00020660	0.00645089	-0.213148	0	negative	2.30663	-0.491655
WBGene00009628	0.00652738	0.0168144	0	positive	103.466	1.73972
WBGene00021339	0.0065682	0.386357	0	positive	0.989003	0.382108
WBGene00022455	0.0068008	-0.0268358	0	negative	128.392	-3.44551
WBGene00002244	0.0068214	0.0215421	0	positive	136.899	2.94908
WBGene00010923	0.00683499	0.0350274	0	positive	84.3873	2.95587
WBGene00010542	0.00690772	0.0574238	0	positive	35.6168	2.04525
WBGene00015104	0.00690802	0.049094	0	positive	83.9717	4.12251
WBGene00015713	0.00691919	-0.0127067	0	negative	113.368	-1.44054
WBGene00012911	0.00692119	0.105741	0	positive	17.8376	1.88617
WBGene00011218	0.00692648	-0.126914	0	negative	19.8454	-2.51866
WBGene00012538	0.00697989	0.0219826	0	positive	68.0203	1.49526
WBGene00016822	0.00698606	0.0637449	0	positive	41.687	2.65733
WBGene00008642	0.007015	0.0348572	0	positive	114.603	3.99475
WBGene00004947	0.00704228	-0.0233981	0	negative	76.6638	-1.79378
WBGene00021960	0.00705329	-0.0310394	0	negative	98.6375	-3.06164
WBGene00008629	0.00705889	-0.0542904	0	negative	21.4757	-1.16593
WBGene00007089	0.00706637	-0.0341634	0	negative	102.485	-3.50124
WBGene00014244	0.00714521	0.052453	0	positive	40.816	2.14092
WBGene00001483	0.00720954	0.219333	0	positive	1.27011	0.278577
WBGene00017931	0.00721051	-0.0184611	0	negative	217.796	-4.02075
WBGene00018364	0.00722999	0.0505696	0	positive	60.1715	3.04285
WBGene00004047	0.0072313	0.0434305	0	positive	67.5445	2.93349
WBGene00006936	0.00724787	0.0160171	0	positive	223.755	3.58389
WBGene00017402	0.00730247	0.0724546	0	positive	34.1574	2.47486
WBGene00015456	0.00731969	0.118738	0	positive	9.24404	1.09762
WBGene00006638	0.0073276	-0.0238372	0	negative	173.317	-4.1314
WBGene00016582	0.00733356	0.047167	0	positive	64.7065	3.05201
WBGene00022252	0.00734542	0.0608222	0	positive	19.3343	1.17596
WBGene00007171	0.007402	-0.0194653	0	negative	149.152	-2.90328
WBGene00001088	0.00740681	-0.0266983	0	negative	158.887	-4.242
WBGene00017311	0.00750345	-0.024728	0	negative	170.489	-4.21586
WBGene00001258	0.00750954	0.0205636	0	positive	138.017	2.83812
WBGene00021366	0.00752437	0.0472899	0	positive	54.634	2.58364
WBGene00021430	0.00752948	0.122892	0	positive	15.3603	1.88766
WBGene00001337	0.00754174	0.0174171	0	positive	217.102	3.78127
WBGene00303000	0.00760435	0.156508	0	positive	9.60223	1.50283
WBGene00004061	0.00762974	-0.102394	0	negative	10.3761	-1.06245
WBGene00016443	0.00765889	0.0464804	0	positive	77.5859	3.60622
WBGene00011063	0.00770375	0.00516586	0	positive	467.864	2.41692
WBGene00008940	0.00777018	-0.076379	0	negative	27.9272	-2.13305
WBGene00000752	0.00780625	0.0101212	0	positive	152.316	1.54161
WBGene00022280	0.00781376	-0.0628623	0	negative	48.2684	-3.03426
WBGene00007720	0.00785795	-0.0289654	0	negative	62.026	-1.79661
WBGene00002267	0.00788627	0.0379556	0	positive	45.2402	1.71712
WBGene00015642	0.00794802	0.0601757	0	positive	41.8746	2.51983
WBGene00011800	0.00795625	-0.116574	0	negative	4.82012	-0.561899
WBGene00018013	0.00797962	0.0595731	0	positive	48.2159	2.87237
WBGene00013682	0.00799729	0.0356024	0	positive	61.7882	2.19981
WBGene00002196	0.00802522	-0.0231174	0	negative	239.497	-5.53653
WBGene00302964	0.00804878	0.154147	0	positive	8.5487	1.31775
WBGene00004506	0.00811362	0.0194969	0	positive	200.742	3.91385
WBGene00012769	0.00815187	-0.00950009	0	negative	252.019	-2.3942
WBGene00000894	0.00822146	-0.00751192	0	negative	528.248	-3.96816
WBGene00022199	0.00825852	0.035652	0	positive	84.5463	3.01425
WBGene00015485	0.00827834	0.0651699	0	positive	20.1085	1.31047
WBGene00001752	0.00831009	-0.0952828	0	negative	12.1967	-1.16213
WBGene00003921	0.008321	-0.0312959	0	negative	89.0428	-2.78667
WBGene00007907	0.00833358	0.0790418	0	positive	33.8191	2.67312
WBGene00001834	0.0083484	-0.0098655	0	negative	316.381	-3.12126
WBGene00012528	0.00837123	-0.0135893	0	negative	177.353	-2.4101
WBGene00010229	0.00838209	0.10051	0	positive	18.8167	1.89127
WBGene00009069	0.0084315	0.0234917	0	positive	57.3631	1.34756
WBGene00013024	0.00843494	0.037005	0	positive	68.5825	2.53789
WBGene00015057	0.00845917	0.108382	0	positive	13.245	1.43552
WBGene00018932	0.0084683	-0.0563061	0	negative	53.0823	-2.98886
WBGene00014108	0.00854384	0.0505889	0	positive	41.6864	2.10887
WBGene00013611	0.00854468	0.14468	0	positive	13.0355	1.88597
WBGene00002003	0.00862719	-0.0362351	0	negative	108.585	-3.93458
WBGene00007201	0.00864307	-0.0664037	0	negative	27.369	-1.8174
WBGene00000123	0.00866189	-0.0112929	0	negative	233.614	-2.63817
WBGene00020936	0.00868541	0.0389727	0	positive	96.3268	3.75412
WBGene00010781	0.00875283	0.0612337	0	positive	43.6945	2.67557
WBGene00003030	0.00888658	-0.00958418	0	negative	200.639	-1.92296
WBGene00014119	0.00890205	-0.017027	0	negative	203.929	-3.4723
WBGene00020314	0.00893839	-0.017584	0	negative	128.605	-2.26139
WBGene00006711	0.00894158	-0.0386048	0	negative	60.4696	-2.33442
WBGene00001244	0.0089733	0.00853333	0	positive	248.47	2.12028
WBGene00004918	0.00898237	0.0259961	0	positive	90.0522	2.34101
WBGene00002183	0.00901965	0.0117556	0	positive	272.658	3.20526
WBGene00003928	0.00905623	0.0173737	0	positive	242.839	4.219
WBGene00001320	0.00909472	-0.016946	0	negative	273.081	-4.62764
WBGene00004040	0.00912547	0.038313	0	positive	93.7212	3.59074
WBGene00022357	0.00916808	0.0380762	0	positive	59.0611	2.24882
WBGene00011850	0.00921529	0.218963	0	positive	3.36097	0.735926
WBGene00000065	0.00923016	-0.00343948	0	negative	518.073	-1.7819
WBGene00004378	0.00923791	0.0208295	0	positive	130.654	2.72145
WBGene00015677	0.00924648	0.0207019	0	positive	181.879	3.76524
WBGene00000219	0.0092855	-0.00118048	0	negative	1583.56	-1.86936
WBGene00007709	0.00929448	-0.00291839	0	negative	1769.63	-5.16448
WBGene00003369	0.00932056	0.0122947	0	positive	181.86	2.2359
WBGene00006762	0.00934224	0.19089	0	positive	5.90933	1.12803
WBGene00012179	0.00935484	0.00459329	0	positive	402.557	1.84906
WBGene00011056	0.00940204	0.106142	0	positive	14.336	1.52166
WBGene00003989	0.00940469	-0.0100531	0	negative	470.201	-4.72696
WBGene00011830	0.00941829	0.0903431	0	positive	12.442	1.12405
WBGene00018044	0.00943614	-0.13577	0	negative	14.6843	-1.9937
WBGene00004125	0.00944366	-0.0258729	0	negative	108.504	-2.80731
WBGene00017989	0.00948831	0.0312584	0	positive	137.745	4.30569
WBGene00007384	0.00957066	-0.118788	0	negative	4.94792	-0.587755
WBGene00011915	0.009579	0.103797	0	positive	13.9998	1.45314
WBGene00014258	0.00958281	0.0295138	0	positive	135.565	4.00104
WBGene00004775	0.0096245	0.0210556	0	positive	179.54	3.78032
WBGene00020392	0.00970681	0.0422708	0	positive	98.0948	4.14654
WBGene00003758	0.00974555	0.114	0	positive	12.1012	1.37953
WBGene00012868	0.00983877	0.0332863	0	positive	110.151	3.66653
WBGene00013553	0.0098543	0.0607912	0	positive	35.3974	2.15185
WBGene00021563	0.00985966	-0.0560486	0	negative	58.9406	-3.30354
WBGene00016061	0.00986815	0.0389689	0	positive	39.0178	1.52048
WBGene00016395	0.00995924	-0.0262376	0	negative	89.8572	-2.35763
WBGene00001833	0.00998827	0.0256709	0	positive	163	4.18436
WBGene00022456	0.009998	-0.0279207	0	negative	200.151	-5.58835
WBGene00010922	0.0100007	0.0742483	0	positive	35.8274	2.66012
WBGene00011662	0.0100062	-0.0155581	0	negative	174.604	-2.71651
WBGene00011916	0.010132	0.0499417	0	positive	57.9302	2.89313
WBGene00019124	0.0101615	-0.0125506	0	negative	287.708	-3.61089
WBGene00001829	0.0102021	0.0149957	0	positive	343.867	5.15651
WBGene00013904	0.0102678	-0.155664	0	negative	5.11548	-0.796296
WBGene00006440	0.010302	0.0419983	0	positive	98.9499	4.15573
WBGene00007358	0.010396	-0.178039	0	negative	1.42597	-0.253878
WBGene00009723	0.0104291	-0.0927481	0	negative	11.7804	-1.09261
WBGene00006698	0.0105174	0.0232164	0	positive	97.1704	2.25595
WBGene00022669	0.0105529	-0.0454745	0	negative	53.8104	-2.447
WBGene00016283	0.0105587	0.175431	0	positive	5.83891	1.02433
WBGene00002250	0.010563	-0.0132647	0	negative	387.653	-5.1421
WBGene00303105	0.010672	0.175577	0	positive	5.5879	0.981109
WBGene00007362	0.0107323	0.0601266	0	positive	15.1627	0.911679
WBGene00010063	0.0107981	0.156349	0	positive	8.07311	1.26222
WBGene00016174	0.010862	-0.159383	0	negative	6.75092	-1.07599
WBGene00021899	0.010867	0.0242539	0	positive	122.83	2.9791
WBGene00007826	0.0109418	0.0702736	0	positive	35.7377	2.51141
WBGene00007963	0.0110257	0.0539976	0	positive	21.5319	1.16267
WBGene00015940	0.0110655	-0.0736604	0	negative	37.9954	-2.79876
WBGene00020994	0.0111405	-0.0163821	0	negative	151.977	-2.4897
WBGene00008764	0.0112298	-0.0244593	0	negative	83.1471	-2.03372
WBGene00017887	0.0112888	-0.0581138	0	negative	50.677	-2.94503
WBGene00017316	0.0113094	-0.0235108	0	negative	139.24	-3.27365
WBGene00008780	0.0113355	-0.0112653	0	negative	452.602	-5.09872
WBGene00016431	0.0113499	-0.118696	0	negative	10.7859	-1.28024
WBGene00020216	0.0114362	-0.015351	0	negative	211.537	-3.2473
WBGene00021818	0.0114926	0.0965423	0	positive	17.3788	1.67779
WBGene00002056	0.0114958	-0.0382694	0	negative	60.6082	-2.31944
WBGene00001852	0.0115084	0.212225	0	positive	4.28402	0.909177
WBGene00004704	0.0116223	0.0306216	0	positive	153.545	4.70178
WBGene00018455	0.0116322	-0.128196	0	negative	13.6082	-1.74451
WBGene00013878	0.0116522	-0.0151032	0	negative	161.681	-2.44189
WBGene00008921	0.0117383	0.0182282	0	positive	248.891	4.53683
WBGene00020166	0.0117451	0.0213465	0	positive	161.473	3.44689
WBGene00001022	0.0117493	-0.0760636	0	negative	31.7285	-2.41338
WBGene00012445	0.0117574	-0.0309299	0	negative	71.2542	-2.20389
WBGene00011741	0.0117577	-0.0159069	0	negative	225.453	-3.58626
WBGene00011399	0.0117611	0.0290955	0	positive	142.634	4.15001
WBGene00022579	0.0118365	0.0413445	0	positive	76.8475	3.17722
WBGene00015280	0.0118488	-0.0165702	0	negative	99.8182	-1.65401
WBGene00002226	0.0119162	0.0195168	0	positive	171.732	3.35166
WBGene00020163	0.0119243	0.175284	0	positive	6.32357	1.10842
WBGene00011860	0.0119418	-0.0352869	0	negative	59.6213	-2.10385
WBGene00016585	0.0119585	0.159812	0	positive	8.4571	1.35155
WBGene00000910	0.011983	-0.173975	0	negative	7.37625	-1.28328
WBGene00003798	0.0119883	0.0140888	0	positive	228.901	3.22494
WBGene00001604	0.0120248	-0.0120832	0	negative	135.095	-1.63238
WBGene00022119	0.01203	0.0167033	0	positive	214.948	3.59033
WBGene00011681	0.012056	-0.0993232	0	negative	17.9511	-1.78296
WBGene00011696	0.0120788	-0.0162421	0	negative	132.124	-2.14598
WBGene00004201	0.0121399	-0.0217375	0	negative	139.028	-3.02212
WBGene00003508	0.0121536	-0.0115528	0	negative	216.604	-2.50238
WBGene00009531	0.0122239	0.0603892	0	positive	26.7596	1.61599
WBGene00007197	0.0123907	0.0957544	0	positive	17.7723	1.70178
WBGene00012545	0.012521	-0.13795	0	negative	10.4273	-1.43845
WBGene00000464	0.0125272	0.0421961	0	positive	97.7335	4.12398
WBGene00021070	0.0125344	-0.11941	0	negative	9.92823	-1.18553
WBGene00006510	0.0126455	-0.0198586	0	negative	175.35	-3.48222
WBGene00018717	0.0126922	0.148678	0	positive	11.6089	1.72598
WBGene00006477	0.0128104	-0.101996	0	negative	18.437	-1.88049
WBGene00000199	0.0128779	-0.0365548	0	negative	118.721	-4.33983
WBGene00003767	0.0129097	0.107196	0	positive	5.96997	0.639958
WBGene00016002	0.0129346	0.0225963	0	positive	124.262	2.80785
WBGene00021763	0.0129607	-0.010469	0	negative	388.617	-4.06844
WBGene00004163	0.0130009	-0.046359	0	negative	48.2278	-2.2358
WBGene00008122	0.0130011	0.167675	0	positive	3.64641	0.611412
WBGene00016238	0.0130173	-0.00881312	0	negative	204.091	-1.79868
WBGene00015581	0.0130583	0.0289131	0	positive	139.334	4.02857
WBGene00000514	0.0130795	-0.128967	0	negative	11.2121	-1.44598
WBGene00022745	0.0131382	-0.0462701	0	negative	41.9108	-1.93922
WBGene00022386	0.0131454	0.210697	0	positive	4.64911	0.979557
WBGene00011985	0.0131494	-0.0330308	0	negative	146.484	-4.83847
WBGene00004243	0.013162	-0.0210625	0	negative	205.111	-4.32014
WBGene00022347	0.0132027	-0.052838	0	negative	80.3808	-4.24716
WBGene00003015	0.0132161	-0.172045	0	negative	5.35971	-0.922108
WBGene00002041	0.0132571	0.0973298	0	positive	19.8166	1.92874
WBGene00016074	0.013267	0.0490506	0	positive	84.8177	4.16036
WBGene00019605	0.0132844	-0.10575	0	negative	12.0337	-1.27257
WBGene00002783	0.0133285	-0.0106597	0	negative	205.186	-2.18722
WBGene00011076	0.013329	0.125758	0	positive	5.97117	0.750925
WBGene00003530	0.0133338	0.0470067	0	positive	40.9427	1.92458
WBGene00009578	0.0133471	-0.0275523	0	negative	75.1423	-2.07034
WBGene00013080	0.0133686	-0.0570807	0	negative	24.9678	-1.42518
WBGene00022865	0.0134974	-0.0223358	0	negative	93.27	-2.08326
WBGene00185078	0.0135383	0.0679628	0	positive	25.1023	1.70602
WBGene00003993	0.0135957	0.0413874	0	positive	50.2467	2.07958
WBGene00011639	0.0136277	0.0448439	0	positive	61.5083	2.75827
WBGene00006918	0.0136685	-0.0167827	0	negative	155.708	-2.6132
WBGene00001368	0.0137202	-0.142379	0	negative	9.53099	-1.35702
WBGene00001430	0.013737	-0.0488928	0	negative	28.3419	-1.38571
WBGene00044483	0.0137843	-0.0517664	0	negative	62.0703	-3.21315
WBGene00015759	0.013806	-0.0164984	0	negative	68.6902	-1.13328
WBGene00006781	0.0138073	0.0463797	0	positive	61.1449	2.83588
WBGene00004804	0.0138081	-0.0121591	0	negative	272.041	-3.30777
WBGene00003230	0.0138353	-0.00162129	0	negative	1255.99	-2.03632
WBGene00013373	0.013837	0.102396	0	positive	10.1578	1.04012
WBGene00008850	0.0139193	0.158769	0	positive	0.875563	0.139012
WBGene00007927	0.013921	-0.0184883	0	negative	115.274	-2.13122
WBGene00015504	0.013996	0.0207268	0	positive	142.828	2.96037
WBGene00000898	0.0140241	0.0283956	0	positive	66.7823	1.89633
WBGene00010053	0.0140443	0.0247406	0	positive	123.18	3.04753
WBGene00303030	0.0140648	0.228552	0	positive	2.05674	0.470073
WBGene00015250	0.0141285	0.0971844	0	positive	18.0803	1.75712
WBGene00001226	0.0141349	0.00983281	0	positive	372.042	3.65822
WBGene00000421	0.0141651	0.0161959	0	positive	167.669	2.71556
WBGene00012663	0.0141706	0.0434073	0	positive	40.6652	1.76516
WBGene00016163	0.0142166	-0.0329501	0	negative	131.673	-4.33865
WBGene00009078	0.0142288	0.0628207	0	positive	28.176	1.77004
WBGene00022365	0.0142839	0.134868	0	positive	11.6632	1.573
WBGene00001651	0.0143162	-0.0628739	0	negative	40.8133	-2.56609
WBGene00000567	0.0143545	0.0180805	0	positive	273.165	4.93896
WBGene00007877	0.0143933	0.100356	0	positive	16.0693	1.61265
WBGene00007514	0.0144491	0.0216	0	positive	136.51	2.94862
WBGene00004282	0.0144512	-0.0805714	0	negative	32.5588	-2.62331
WBGene00007855	0.0145488	0.0859899	0	positive	16.565	1.42442
WBGene00008415	0.0145641	0.0394937	0	positive	42.8263	1.69137
WBGene00000812	0.014665	0.0451127	0	positive	84.8605	3.82829
WBGene00007965	0.0146949	-0.0227844	0	negative	201.943	-4.60114
WBGene00044253	0.0147031	0.17448	0	positive	4.62635	0.807207
WBGene00011309	0.0147097	0.0828116	0	positive	20.4833	1.69626
WBGene00016073	0.0147337	0.0478788	0	positive	65.4082	3.13166
WBGene00021263	0.0147747	0.0348298	0	positive	29.0268	1.011
WBGene00016011	0.0148206	0.0257692	0	positive	80.1146	2.06449
WBGene00003637	0.0148351	-0.0998298	0	negative	17.0853	-1.70563
WBGene00000240	0.0148958	0.0288767	0	positive	78.157	2.25692
WBGene00013497	0.0149355	-0.19929	0	negative	4.85655	-0.967861
WBGene00019477	0.0149414	0.113771	0	positive	6.69021	0.761155
WBGene00013789	0.0150149	0.0876212	0	positive	22.5856	1.97898
WBGene00009915	0.0150681	-0.0188032	0	negative	144.477	-2.71663
WBGene00302982	0.0150695	0.205932	0	positive	3.99996	0.823718
WBGene00006721	0.0150798	-0.135814	0	negative	12.689	-1.72334
WBGene00002071	0.0151174	-0.0543065	0	negative	52.688	-2.8613
WBGene00019719	0.0151524	-0.0202936	0	negative	188.933	-3.83412
WBGene00019871	0.0151746	-0.0389003	0	negative	52.7448	-2.05179
WBGene00013238	0.0151869	-0.00527238	0	negative	445.503	-2.34886
WBGene00021464	0.015205	0.20881	0	positive	3.33232	0.695821
WBGene00004355	0.0152111	0.0257337	0	positive	125.785	3.23692
WBGene00016264	0.0153872	-0.114885	0	negative	11.1608	-1.28221
WBGene00010847	0.0154243	0.0603228	0	positive	42.9834	2.59288
WBGene00004747	0.0154804	0.0397296	0	positive	18.8615	0.749359
WBGene00009256	0.0154833	0.0497179	0	positive	40.7345	2.02523
WBGene00006772	0.0155013	0.20221	0	positive	4.41659	0.893078
WBGene00015347	0.0155285	0.0391543	0	positive	96.5947	3.7821
WBGene00013726	0.0155588	-0.0675759	0	negative	18.1143	-1.22409
WBGene00012693	0.0155865	-0.112233	0	negative	16.2375	-1.82239
WBGene00000266	0.0156181	0.133555	0	positive	11.1333	1.48691
WBGene00016022	0.015621	0.0982843	0	positive	9.29739	0.913788
WBGene00006527	0.0156549	-0.04838	0	negative	44.4763	-2.15176
WBGene00011680	0.0156767	-0.0227863	0	negative	61.4908	-1.40114
WBGene00020321	0.0156896	0.229561	0	positive	4.14089	0.950584
WBGene00004831	0.0156933	0.170418	0	positive	7.0171	1.19584
WBGene00016930	0.0157222	0.0876054	0	positive	28.9968	2.54028
WBGene00015044	0.015766	0.130548	0	positive	3.4746	0.453603
WBGene00014096	0.0157931	-0.0246786	0	negative	198.45	-4.89748
WBGene00002245	0.0158334	-0.0220282	0	negative	145.255	-3.19971
WBGene00021636	0.0158757	0.0470421	0	positive	73.6352	3.46396
WBGene00009574	0.0159142	-0.0302159	0	negative	88.2416	-2.6663
WBGene00011292	0.0159321	-0.0204231	0	negative	213.069	-4.35153
WBGene00015355	0.0159524	0.079861	0	positive	12.4494	0.994224
WBGene00000165	0.0160403	0.0276946	0	positive	85.9814	2.38122
WBGene00016138	0.0160405	-0.0503953	0	negative	43.1284	-2.17347
WBGene00012216	0.0160638	0.101743	0	positive	10.5974	1.07821
WBGene00044922	0.016076	0.120516	0	positive	5.17887	0.624136
WBGene00009584	0.0160926	-0.0219589	0	negative	136.394	-2.99507
WBGene00004881	0.01614	0.0434927	0	positive	44.6809	1.94329
WBGene00009712	0.0161681	-0.0272121	0	negative	115.705	-3.14857
WBGene00021657	0.0163683	-0.0909898	0	negative	22.4767	-2.04515
WBGene00017674	0.0163905	0.0817186	0	positive	19.907	1.62677
WBGene00138717	0.0164959	0.0865358	0	positive	26.3799	2.2828
WBGene00013550	0.0165217	0.066673	0	positive	40.0411	2.66966
WBGene00008100	0.0166824	0.169999	0	positive	4.77487	0.811723
WBGene00022599	0.0167278	0.00622511	0	positive	532.313	3.31371
WBGene00003151	0.0167519	-0.023248	0	negative	126.259	-2.93527
WBGene00022045	0.016765	0.100848	0	positive	18.5324	1.86895
WBGene00022200	0.0169069	0.0615797	0	positive	28.0059	1.7246
WBGene00013689	0.0169177	-0.0156489	0	negative	217.1	-3.39739
WBGene00018948	0.0171153	-0.0226503	0	negative	177.467	-4.01969
WBGene00004798	0.0171226	-0.000714664	0	negative	3010.77	-2.15169
WBGene00008444	0.0171358	0.0408343	0	positive	58.9301	2.40637
WBGene00004101	0.0171707	-0.00922606	0	negative	173.453	-1.60029
WBGene00014152	0.0173612	0.132416	0	positive	10.5615	1.39851
WBGene00002025	0.0173855	0.00754175	0	positive	443.189	3.34242
WBGene00022448	0.0174751	0.054174	0	positive	33.5056	1.81513
WBGene00009621	0.0174811	0.0464121	0	positive	24.3759	1.13133
WBGene00012928	0.0174817	0.0701053	0	positive	34.5416	2.42155
WBGene00007108	0.0175266	0.0361722	0	positive	94.8512	3.43098
WBGene00004755	0.0175311	0.0167543	0	positive	183.262	3.07042
WBGene00016650	0.0175572	0.0234555	0	positive	126.942	2.97748
WBGene00003090	0.0175719	-0.00899271	0	negative	212.287	-1.90903
WBGene00001449	0.0175972	0.0537709	0	positive	31.1161	1.67314
WBGene00020507	0.0176609	-0.0265873	0	negative	136.439	-3.62755
WBGene00015608	0.017684	-0.203733	0	negative	5.71664	-1.16467
WBGene00003994	0.0176859	0.01201	0	positive	262.451	3.15203
WBGene00007731	0.0177443	-0.0831375	0	negative	21.6511	-1.80002
WBGene00004751	0.0177741	-0.0289294	0	negative	43.727	-1.26499
WBGene00019326	0.0178278	0.0466153	0	positive	45.2088	2.10742
WBGene00004344	0.0179511	-0.179204	0	negative	4.93061	-0.883585
WBGene00012386	0.0179651	0.0345791	0	positive	86.7236	2.99882
WBGene00022150	0.017991	0.0448629	0	positive	73.9431	3.3173
WBGene00016965	0.0180426	-0.0658904	0	negative	41.983	-2.76627
WBGene00017924	0.0183054	0.0909099	0	positive	20.3543	1.85041
WBGene00011511	0.0183099	0.031832	0	positive	111.063	3.53536
WBGene00021038	0.0183269	0.0338644	0	positive	115.667	3.917
WBGene00015122	0.0183854	-0.0729829	0	negative	16.594	-1.21108
WBGene00021367	0.0184555	-0.0505051	0	negative	38.9339	-1.96636
WBGene00013587	0.0185955	0.0723904	0	positive	23.1601	1.67657
WBGene00004273	0.0185989	-0.0141235	0	negative	156.466	-2.20985
WBGene00019427	0.0186127	0.0555968	0	positive	30.631	1.70299
WBGene00008856	0.0187105	-0.0234758	0	negative	129.298	-3.03539
WBGene00019967	0.0187606	0.107723	0	positive	5.93544	0.639386
WBGene00020027	0.018786	0.0509228	0	positive	58.6999	2.98916
WBGene00000133	0.0188922	-0.0705759	0	negative	11.633	-0.821009
WBGene00021508	0.0189078	0.0659651	0	positive	33.9484	2.23941
WBGene00000090	0.0189674	0.0366983	0	positive	110.416	4.05206
WBGene00004880	0.0189823	0.0331715	0	positive	52.1919	1.73128
WBGene00013740	0.0190873	-0.0436583	0	negative	78.6145	-3.43217
WBGene00022490	0.0191043	-0.0739897	0	negative	22.0548	-1.63183
WBGene00004175	0.019114	-0.0341377	0	negative	51.6728	-1.76399
WBGene00022663	0.0191542	-0.0781013	0	negative	29.0383	-2.26793
WBGene00000040	0.0191821	0.0212719	0	positive	116.312	2.47419
WBGene00009364	0.0191955	-0.0160921	0	negative	164.495	-2.64706
WBGene00010459	0.0192474	0.0956911	0	positive	21.1599	2.02481
WBGene00022474	0.0193105	-0.143493	0	negative	9.85155	-1.41363
WBGene00003789	0.0194187	0.0172411	0	positive	196.371	3.38566
WBGene00021392	0.0194948	0.0407333	0	positive	82.4138	3.35699
WBGene00006920	0.0195292	-0.0155312	0	negative	195.91	-3.04272
WBGene00015638	0.0195412	0.0914011	0	positive	20.2724	1.85292
WBGene00013680	0.0196823	0.0505226	0	positive	52.5561	2.65527
WBGene00002881	0.0196826	-0.201674	0	negative	4.17196	-0.841377
WBGene00013551	0.019702	-0.0612159	0	negative	44.4319	-2.71994
WBGene00018399	0.0197883	0.0716546	0	positive	23.2697	1.66738
WBGene00003995	0.0198028	0.0407063	0	positive	14.9397	0.608138
WBGene00019087	0.0198068	0.0231282	0	positive	169.207	3.91344
WBGene00011232	0.0198788	0.00297418	0	positive	744.473	2.2142
WBGene00006957	0.0198813	-0.0156369	0	negative	124.428	-1.94567
WBGene00011689	0.0199466	0.0681449	0	positive	24.8157	1.69107
WBGene00020999	0.0199546	0.0232979	0	positive	124.207	2.89376
WBGene00013209	0.0200413	-0.0255876	0	negative	178.492	-4.56717
WBGene00020183	0.0200475	-0.0398192	0	negative	30.9355	-1.23182
WBGene00021614	0.0200592	0.196856	0	positive	4.38193	0.862611
WBGene00016442	0.0201282	-0.0456174	0	negative	46.6593	-2.12847
WBGene00001149	0.0201628	0.0112607	0	positive	233.013	2.62389
WBGene00019847	0.0202079	-0.147246	0	negative	6.69083	-0.985198
WBGene00000831	0.0202543	0.0373574	0	positive	54.7849	2.04662
WBGene00003901	0.0202786	-0.00776713	0	negative	433.216	-3.36484
WBGene00003047	0.0203171	0.0263296	0	positive	140.875	3.70919
WBGene00011648	0.02038	-0.0202238	0	negative	65.648	-1.32765
WBGene00022797	0.0204144	0.0795591	0	positive	17.2126	1.36942
WBGene00045245	0.0204314	0.12896	0	positive	6.61472	0.853038
WBGene00003659	0.0204436	-0.122451	0	negative	11.8156	-1.44682
WBGene00184990	0.020507	0.0617982	0	positive	33.6524	2.07966
WBGene00021919	0.0205748	0.292589	0	positive	0.795008	0.23261
WBGene00022881	0.0205929	-0.0455244	0	negative	59.3376	-2.70131
WBGene00012326	0.0206233	0.0281052	0	positive	108.46	3.04829
WBGene00006508	0.0206255	0.0484549	0	positive	25.7963	1.24996
WBGene00008147	0.0206502	-0.0214821	0	negative	106.195	-2.28128
WBGene00008823	0.0206532	-0.0267197	0	negative	87.4998	-2.33797
WBGene00002066	0.0206587	0.00607692	0	positive	377.624	2.29479
WBGene00017675	0.0208034	-0.00802739	0	negative	272.812	-2.18997
WBGene00000558	0.0208167	0.197144	0	positive	1.84952	0.364621
WBGene00019221	0.0208299	0.0642044	0	positive	25.543	1.63997
WBGene00000887	0.020865	0.0496416	0	positive	50.3823	2.50106
WBGene00000202	0.0208733	0.0271605	0	positive	65.0191	1.76596
WBGene00021764	0.0210322	0.046577	0	positive	65.4485	3.04839
WBGene00012762	0.0210857	0.0280002	0	positive	167.797	4.69834
WBGene00015472	0.0210885	0.111011	0	positive	8.60733	0.955507
WBGene00020441	0.0210888	-0.0336376	0	negative	90.8098	-3.05462
WBGene00000080	0.0211139	0.0645033	0	positive	37.42	2.41371
WBGene00003393	0.0211446	0.0226411	0	positive	112.468	2.54639
WBGene00007499	0.0212683	0.0287758	0	positive	90.7545	2.61153
WBGene00009724	0.0213311	0.0320591	0	positive	15.2489	0.488864
WBGene00008283	0.0213389	0.102673	0	positive	11.8257	1.21419
WBGene00011068	0.0214061	-0.0549579	0	negative	62.5521	-3.43773
WBGene00004014	0.0214309	-0.0102284	0	negative	331.927	-3.39508
WBGene00004380	0.0215156	0.0469184	0	positive	65.2479	3.06132
WBGene00008052	0.0215463	0.0181962	0	positive	134.331	2.44432
WBGene00010484	0.0215542	0.103066	0	positive	14.6364	1.50852
WBGene00016192	0.0215779	0.0445317	0	positive	69.7029	3.10398
WBGene00021732	0.0216254	-0.0296819	0	negative	89.5965	-2.65939
WBGene00014088	0.0217651	0.0587738	0	positive	18.3999	1.08144
WBGene00019060	0.0217735	0.0644078	0	positive	15.2051	0.97933
WBGene00000535	0.0217802	0.00940762	0	positive	80.027	0.752863
WBGene00013254	0.0219076	-0.109341	0	negative	9.73103	-1.064
WBGene00013688	0.0219137	0.0305489	0	positive	114.098	3.48558
WBGene00044032	0.0219357	0.122577	0	positive	11.9298	1.46232
WBGene00008877	0.0219919	0.0555732	0	positive	55.3763	3.07743
WBGene00001994	0.0220436	-0.0239176	0	negative	65.2675	-1.56104
WBGene00008852	0.0220572	-0.0208124	0	negative	198.054	-4.12197
WBGene00007330	0.022134	0.0201363	0	positive	202.866	4.08496
WBGene00011858	0.0221553	-0.0410589	0	negative	67.1144	-2.75564
WBGene00001336	0.0221594	0.0158612	0	positive	183.405	2.90903
WBGene00015501	0.0221845	0.0301891	0	positive	117.153	3.53675
WBGene00022427	0.0221898	0.0445583	0	positive	59.0126	2.6295
WBGene00000236	0.0222433	0.0385911	0	positive	83.1454	3.20867
WBGene00006916	0.0222915	0.0207485	0	positive	131.841	2.73551
WBGene00004078	0.0223664	-0.00287052	0	negative	1283.46	-3.6842
WBGene00000206	0.0223902	0.00995249	0	positive	256.952	2.55731
WBGene00044294	0.0224192	-0.0681256	0	negative	29.503	-2.00991
WBGene00013462	0.0225325	0.0448048	0	positive	77.4849	3.47169
WBGene00008148	0.0226282	-0.0312619	0	negative	82.8176	-2.58903
WBGene00000144	0.0226955	0.0550021	0	positive	38.6541	2.12606
WBGene00010961	0.0227065	-0.00768988	0	negative	101.658	-0.781738
WBGene00012259	0.0228283	0.166461	0	positive	7.6582	1.27479
WBGene00013730	0.0228346	-0.0366776	0	negative	55.1005	-2.02095
WBGene00018051	0.0228473	0.0747715	0	positive	15.8588	1.18578
WBGene00001559	0.0229166	0.143012	0	positive	9.15948	1.30991
WBGene00003511	0.0229957	-0.0669637	0	negative	22.556	-1.51043
WBGene00021238	0.023022	0.0647584	0	positive	19.5936	1.26885
WBGene00021332	0.0232085	0.0586527	0	positive	34.7861	2.0403
WBGene00013709	0.0232098	-0.0105368	0	negative	183.667	-1.93527
WBGene00019831	0.0232413	-0.00754693	0	negative	367.096	-2.77045
WBGene00017547	0.0233239	-0.0330548	0	negative	108.019	-3.57054
WBGene00019456	0.0233986	0.114769	0	positive	8.33407	0.95649
WBGene00007694	0.0234191	0.168691	0	positive	3.94893	0.666148
WBGene00008132	0.0234864	0.0163695	0	positive	109.758	1.79668
WBGene00020647	0.0235772	-0.0406307	0	negative	79.0308	-3.21108
WBGene00013632	0.0235829	-0.0799548	0	negative	20.0154	-1.60032
WBGene00003778	0.0236122	0.165452	0	positive	1.74591	0.288865
WBGene00021440	0.0236167	-0.0368141	0	negative	96.3272	-3.54619
WBGene00022152	0.0237502	-0.0453737	0	negative	56.5222	-2.56462
WBGene00019460	0.0238232	-0.0349133	0	negative	68.3082	-2.38486
WBGene00007602	0.0238297	0.0435083	0	positive	72.6996	3.16303
WBGene00009394	0.0238632	-0.00265451	0	negative	499.854	-1.32686
WBGene00017127	0.0238668	0.0260385	0	positive	47.0614	1.22541
WBGene00004988	0.023903	0.0227848	0	positive	82.2147	1.87324
WBGene00044746	0.0239062	0.122471	0	positive	9.9261	1.21566
WBGene00019380	0.0239292	0.0314412	0	positive	96.6298	3.03816
WBGene00022812	0.0239908	-0.0352412	0	negative	62.304	-2.19567
WBGene00022281	0.0240009	-0.0450475	0	negative	49.1352	-2.21342
WBGene00022052	0.0240355	0.0444138	0	positive	54.8654	2.43678
WBGene00003385	0.0241117	-0.177758	0	negative	4.9914	-0.887262
WBGene00016535	0.0241996	-0.0918962	0	negative	11.7238	-1.07737
WBGene00015136	0.0242512	0.101337	0	positive	18.0318	1.82729
WBGene00015499	0.0243026	0.0212335	0	positive	101.496	2.15513
WBGene00021635	0.0246263	0.131783	0	positive	7.79731	1.02756
WBGene00010828	0.0246611	-0.00740557	0	negative	296.058	-2.19248
WBGene00022373	0.024705	0.0525438	0	positive	45.463	2.3888
WBGene00022089	0.0247086	-0.00889418	0	negative	587.537	-5.22566
WBGene00008232	0.0247629	0.106973	0	positive	15.1633	1.62206
WBGene00020397	0.0248271	0.0857979	0	positive	16.6558	1.42903
WBGene00009521	0.0248736	0.037083	0	positive	62.2778	2.30945
WBGene00013257	0.0248911	-0.188275	0	negative	4.33907	-0.81694
WBGene00023427	0.0248969	0.0965334	0	positive	14.8228	1.43089
WBGene00001830	0.0249422	0.0219462	0	positive	189.711	4.16345
WBGene00017696	0.0249498	0.0366373	0	positive	64.7553	2.37246
WBGene00013096	0.0250676	0.027928	0	positive	87.2492	2.4367
WBGene00002202	0.0250878	-0.00658358	0	negative	411.039	-2.70611
WBGene00022821	0.0251076	0.0223164	0	positive	66.3667	1.48107
WBGene00022366	0.025122	0.0797309	0	positive	19.2062	1.53133
WBGene00000086	0.0251775	0.198388	0	positive	3.3829	0.671125
WBGene00017889	0.0252051	0.054026	0	positive	34.0727	1.84081
WBGene00004189	0.0252149	0.0145796	0	positive	193.42	2.81999
WBGene00013605	0.0252367	-0.0768278	0	negative	26.2607	-2.01755
WBGene00011119	0.0252375	0.0226128	0	positive	78.9749	1.78584
WBGene00004905	0.0252939	0.0432725	0	positive	33.1095	1.43273
WBGene00013030	0.0254302	-0.0333433	0	negative	76.2996	-2.54408
WBGene00021078	0.025561	-0.0306411	0	negative	95.4326	-2.92416
WBGene00005025	0.0256295	-0.0178523	0	negative	106.071	-1.89362
WBGene00015933	0.0256335	-0.00531041	0	negative	124.779	-0.662626
WBGene00011364	0.0257525	-0.102359	0	negative	6.83557	-0.699685
WBGene00000275	0.0258058	0.0162985	0	positive	220.328	3.59102
WBGene00013538	0.0258487	0.0346211	0	positive	88.1079	3.05039
WBGene00006609	0.0258508	-0.0665932	0	negative	28.8136	-1.91879
WBGene00007703	0.0259193	-0.0174204	0	negative	97.48	-1.69814
WBGene00010303	0.0259283	-0.0120929	0	negative	225.447	-2.7263
WBGene00020993	0.0259571	0.0575033	0	positive	41.5697	2.39039
WBGene00022286	0.026056	0.0239359	0	positive	128.894	3.08518
WBGene00044508	0.0261221	-0.0771179	0	negative	16.8679	-1.30082
WBGene00012289	0.0261606	-0.182405	0	negative	5.07397	-0.925517
WBGene00007221	0.0262876	0.0224792	0	positive	127.033	2.85559
WBGene00007515	0.0262876	-0.0981144	0	negative	3.46476	-0.339943
WBGene00000393	0.0263286	-0.0604486	0	negative	32.823	-1.9841
WBGene00007736	0.0263666	0.104268	0	positive	10.732	1.119
WBGene00010896	0.0264487	0.00551049	0	positive	375.603	2.06976
WBGene00022410	0.0266986	-0.082447	0	negative	10.2792	-0.847488
WBGene00000063	0.0268718	-0.00446947	0	negative	281.501	-1.25816
WBGene00020089	0.0269102	-0.0508622	0	negative	38.1377	-1.93977
WBGene00004809	0.0269389	0.0667858	0	positive	20.4036	1.36267
WBGene00018923	0.0269638	0.0449708	0	positive	57.0426	2.56525
WBGene00000901	0.0270776	-0.0434799	0	negative	40.1171	-1.74429
WBGene00008205	0.0272272	-0.00799357	0	negative	310.01	-2.47809
WBGene00006737	0.027372	0.0322308	0	positive	122.329	3.94275
WBGene00012471	0.0274354	0.0138253	0	positive	275.819	3.81328
WBGene00009982	0.0275772	-0.0417769	0	negative	17.0053	-0.710431
WBGene00010440	0.0276565	0.00999489	0	positive	121.717	1.21655
WBGene00007287	0.0277235	0.0559231	0	positive	36.8767	2.06226
WBGene00019628	0.0280111	-0.00285265	0	negative	591.346	-1.6869
WBGene00009732	0.0280779	0.0360715	0	positive	71.6748	2.58542
WBGene00012934	0.0281427	0.0348741	0	positive	73.4481	2.56144
WBGene00006415	0.028264	-0.0471769	0	negative	68.4416	-3.22886
WBGene00011029	0.0283561	0.0623593	0	positive	37.8439	2.35992
WBGene00004465	0.0283861	0.0123379	0	positive	243.238	3.00104
WBGene00020783	0.0283965	0.0713317	0	positive	27.5415	1.96458
WBGene00021675	0.0284078	-0.151748	0	negative	7.55135	-1.14591
WBGene00013729	0.0285074	0.0260621	0	positive	144.174	3.75747
WBGene00002891	0.0285408	-0.0138394	0	negative	244.806	-3.38797
WBGene00022781	0.0285501	-0.0159929	0	negative	215.786	-3.45105
WBGene00021559	0.0285529	0.0315783	0	positive	90.6751	2.86336
WBGene00017905	0.0285721	-0.185218	0	negative	3.00355	-0.556312
WBGene00000068	0.0285906	0.184097	0	positive	4.57646	0.842515
WBGene00013790	0.0287014	0.0758257	0	positive	30.152	2.2863
WBGene00004900	0.0288357	-0.0455696	0	negative	45.607	-2.07829
WBGene00010778	0.028864	0.0155392	0	positive	162.025	2.51773
WBGene00006707	0.0288987	0.0192648	0	positive	123.775	2.38449
WBGene00019987	0.0289171	-0.0749619	0	negative	26.2553	-1.96815
WBGene00000182	0.0289622	-0.00577819	0	negative	406.75	-2.35028
WBGene00019203	0.0289819	0.0265102	0	positive	71.6401	1.89919
WBGene00011997	0.0290156	-0.0817204	0	negative	10.8694	-0.888252
WBGene00018765	0.0290691	-0.0285656	0	negative	93.2835	-2.6647
WBGene00000935	0.0291326	-0.0037924	0	negative	480.313	-1.82154
WBGene00010130	0.0291784	-0.0206532	0	negative	223.935	-4.62498
WBGene00015912	0.029212	0.0335019	0	positive	61.562	2.06244
WBGene00015735	0.029293	-0.0787862	0	negative	12.1377	-0.95628
WBGene00008803	0.029303	-0.105155	0	negative	9.63203	-1.01286
WBGene00009272	0.029421	-0.0280489	0	negative	122.812	-3.44475
WBGene00004443	0.0294952	0.00296043	0	positive	482.902	1.4296
WBGene00017125	0.0295015	0.0191016	0	positive	194.098	3.70759
WBGene00018954	0.0297178	-0.0363809	0	negative	61.8057	-2.24855
WBGene00012241	0.0297329	0.0271863	0	positive	122.76	3.3374
WBGene00013742	0.0297404	-0.037065	0	negative	81.617	-3.02514
WBGene00018424	0.029842	-0.0360473	0	negative	49.6855	-1.79103
WBGene00015647	0.0298722	-0.0857262	0	negative	14.5142	-1.24425
WBGene00009978	0.029928	-0.028941	0	negative	77.5138	-2.24333
WBGene00022134	0.0299551	0.022472	0	positive	106.169	2.38584
WBGene00000175	0.0299647	-0.0223344	0	negative	98.3262	-2.19605
WBGene00010867	0.0299896	-0.0800897	0	negative	15.3128	-1.2264
WBGene00016509	0.0300963	-0.00974362	0	negative	326.571	-3.18198
WBGene00303011	0.0302593	0.106808	0	positive	10.4597	1.11718
WBGene00010502	0.0302642	0.0128232	0	positive	200.423	2.57007
WBGene00016809	0.0302787	0.111743	0	positive	7.58108	0.847135
WBGene00007486	0.0303239	-0.224858	0	negative	3.96789	-0.892213
WBGene00019170	0.0303254	0.135546	0	positive	8.50819	1.15325
WBGene00003084	0.0303402	-0.0637298	0	negative	33.4752	-2.13337
WBGene00010703	0.030481	0.110566	0	positive	12.5839	1.39134
WBGene00022380	0.0304908	-0.0301728	0	negative	93.9668	-2.83524
WBGene00011055	0.0305739	0.162299	0	positive	7.20853	1.16994
WBGene00008042	0.0306143	0.0863129	0	positive	7.78393	0.671853
WBGene00022178	0.0306584	0.0343598	0	positive	67.2439	2.31049
WBGene00015743	0.030671	0.0249429	0	positive	101.506	2.53186
WBGene00015947	0.0306746	0.200438	0	positive	3.4296	0.687421
WBGene00008476	0.0307063	0.20289	0	positive	3.85623	0.782388
WBGene00011629	0.0307305	0.0106298	0	positive	273.461	2.90685
WBGene00018011	0.0307792	0.0374362	0	positive	102.678	3.84387
WBGene00007180	0.0307997	-0.134669	0	negative	7.59583	-1.02292
WBGene00010913	0.0308087	-0.0481174	0	negative	48.869	-2.35145
WBGene00011979	0.030853	-0.0158935	0	negative	43.8859	-0.697499
WBGene00018203	0.0308917	0.160523	0	positive	5.33825	0.856912
WBGene00003185	0.0309093	-0.0223028	0	negative	144.874	-3.23109
WBGene00007536	0.0309138	0.0928671	0	positive	15.0908	1.40144
WBGene00021474	0.0309204	0.0240428	0	positive	118.054	2.83836
WBGene00019388	0.0309301	0.244878	0	positive	1.56663	0.383634
WBGene00021754	0.0311236	0.0279855	0	positive	79.6497	2.22904
WBGene00021986	0.0311816	0.0387581	0	positive	30.8662	1.19632
WBGene00000865	0.0311875	-0.00817245	0	negative	646.135	-5.28051
WBGene00010593	0.0313035	0.0702766	0	positive	19.2767	1.3547
WBGene00011481	0.0313095	-0.0102752	0	negative	314.932	-3.23599
WBGene00000099	0.0313512	-0.0337984	0	negative	116.31	-3.93109
WBGene00008930	0.0314582	0.112066	0	positive	8.8914	0.996428
WBGene00000939	0.0314657	0.0206533	0	positive	124.93	2.58022
WBGene00019807	0.0314694	-0.0324601	0	negative	57.8528	-1.8779
WBGene00003422	0.0315632	0.0150256	0	positive	187.213	2.81299
WBGene00015742	0.0315662	0.0930289	0	positive	18.0624	1.68032
WBGene00019600	0.0315862	0.021259	0	positive	173.18	3.68162
WBGene00010750	0.0316079	-0.17926	0	negative	4.41298	-0.791071
WBGene00020199	0.031612	-0.0543	0	negative	46.5449	-2.52739
WBGene00013407	0.0316986	-0.0309344	0	negative	79.9703	-2.47383
WBGene00022376	0.0317242	-0.0463578	0	negative	57.7844	-2.67875
WBGene00009534	0.0318561	0.0989921	0	positive	16.6312	1.64635
WBGene00004477	0.031892	-0.00227876	0	negative	1766.51	-4.02546
WBGene00021820	0.0321527	-0.0491344	0	negative	55.946	-2.74887
WBGene00012293	0.032173	0.0832955	0	positive	10.0221	0.834797
WBGene00002344	0.0322263	-0.00274469	0	negative	825.537	-2.26584
WBGene00015050	0.0322687	-0.0807967	0	negative	16.8975	-1.36527
WBGene00020006	0.0323635	0.119799	0	positive	12.259	1.46862
WBGene00017088	0.0323932	-0.0100697	0	negative	310.599	-3.12764
WBGene00004450	0.0324059	0.00352196	0	positive	655.017	2.30694
WBGene00012646	0.0324515	-0.0472407	0	negative	63.178	-2.98457
WBGene00009476	0.0325298	0.0987516	0	positive	13.4036	1.32363
WBGene00004377	0.0326241	0.0698308	0	positive	31.942	2.23054
WBGene00001477	0.0327135	0.298924	0	positive	0.219022	0.0654707
WBGene00019515	0.0327219	0.133601	0	positive	5.54683	0.74106
WBGene00000754	0.0327934	0.00116313	0	positive	1331.5	1.54871
WBGene00022128	0.0328305	0.0503685	0	positive	43.87	2.20967
WBGene00014165	0.0328466	0.0183854	0	positive	131.191	2.41199
WBGene00018010	0.0328479	0.0365732	0	positive	78.5206	2.87175
WBGene00001017	0.0328827	0.0286875	0	positive	128.923	3.69849
WBGene00001025	0.032922	0.0437736	0	positive	45.5748	1.99497
WBGene00009508	0.0329343	-0.0258168	0	negative	166.047	-4.28681
WBGene00018874	0.0330106	0.149555	0	positive	5.5522	0.83036
WBGene00009556	0.033024	-0.0690497	0	negative	31.1658	-2.15199
WBGene00009740	0.0330581	0.026158	0	positive	112.658	2.94692
WBGene00003958	0.0330835	-0.043319	0	negative	32.2862	-1.3986
WBGene00000784	0.0331839	0.00361162	0	positive	365.835	1.32126
WBGene00017044	0.0332019	0.0449376	0	positive	54.8207	2.46351
WBGene00001814	0.0332758	-0.0808507	0	negative	20.3758	-1.6474
WBGene00000475	0.0333486	0.00598577	0	positive	663.045	3.96884
WBGene00000715	0.0334234	0.0301241	0	positive	14.6536	0.441427
WBGene00010724	0.0334651	0.146416	0	positive	6.85314	1.00341
WBGene00010306	0.0335146	0.0344316	0	positive	63.0317	2.17028
WBGene00008224	0.033564	-0.0111419	0	negative	175.949	-1.96041
WBGene00002065	0.0336101	-0.0167949	0	negative	134.407	-2.25735
WBGene00003473	0.0336937	0.046428	0	positive	1.16032	0.0538714
WBGene00013268	0.0337305	0.0479955	0	positive	49.6195	2.38151
WBGene00044200	0.0337891	0.0612164	0	positive	13.8087	0.845318
WBGene00008399	0.0338314	-0.0367633	0	negative	87.2875	-3.20898
WBGene00004091	0.0338648	0.0332767	0	positive	94.073	3.13044
WBGene00004492	0.0339498	0.00131307	0	positive	1222.16	1.60478
WBGene00003847	0.0339821	-0.124043	0	negative	6.16235	-0.764396
WBGene00018892	0.0340128	-0.015514	0	negative	214.454	-3.32703
WBGene00011367	0.0340597	0.0513805	0	positive	54.8716	2.81933
WBGene00009274	0.0340733	-0.107977	0	negative	7.9189	-0.855061
WBGene00022246	0.034124	0.121689	0	positive	9.75513	1.18709
WBGene00001046	0.0342235	-0.0174453	0	negative	96.28	-1.67963
WBGene00017598	0.0342889	-0.131845	0	negative	3.72656	-0.49133
WBGene00007773	0.0344218	-0.0396856	0	negative	42.2015	-1.67479
WBGene00017828	0.0344564	-0.0490536	0	negative	52.0487	-2.55318
WBGene00004889	0.0344911	-0.0385985	0	negative	57.0685	-2.20276
WBGene00013241	0.034507	0.0433696	0	positive	70.1779	3.04359
WBGene00016758	0.0345273	-0.160914	0	negative	6.13948	-0.987928
WBGene00008220	0.0345968	-0.0818022	0	negative	9.15948	-0.749265
WBGene00011737	0.0346049	0.0307298	0	positive	35.8144	1.10057
WBGene00235094	0.0348043	0.135037	0	positive	4.88444	0.659579
WBGene00004823	0.0348774	-0.0381324	0	negative	73.3752	-2.79798
WBGene00007991	0.0349532	-0.0488063	0	negative	28.6528	-1.39844
WBGene00010967	0.0349893	-0.00247688	0	negative	630.969	-1.56284
WBGene00003019	0.0350612	0.152906	0	positive	5.82043	0.889977
WBGene00013453	0.0351232	0.113038	0	positive	9.58681	1.08368
WBGene00016966	0.0352723	-0.04582	0	negative	46.0304	-2.10911
WBGene00013161	0.0354786	0.0871936	0	positive	18.5983	1.62165
WBGene00015460	0.0355958	0.0567568	0	positive	32.4853	1.84376
WBGene00018055	0.0356005	-0.105694	0	negative	6.70878	-0.70908
WBGene00011970	0.0357238	-0.0231747	0	negative	73.8418	-1.71126
WBGene00003388	0.0357538	-0.152571	0	negative	5.90502	-0.900933
WBGene00016714	0.035879	-0.0932265	0	negative	9.51487	-0.887038
WBGene00016219	0.0358796	0.104926	0	positive	7.09726	0.744688
WBGene00020725	0.0359584	-0.0474876	0	negative	26.0607	-1.23756
WBGene00007168	0.0360623	0.01183	0	positive	307.885	3.64228
WBGene00021457	0.0361	-0.216138	0	negative	1.60507	-0.346917
WBGene00003613	0.0362502	-0.0973386	0	negative	11.0148	-1.07217
WBGene00009164	0.0363008	-0.0131817	0	negative	167.078	-2.20237
WBGene00021726	0.0363234	0.193571	0	positive	1.58914	0.307611
WBGene00004979	0.0363897	-0.0995524	0	negative	14.4165	-1.4352
WBGene00009668	0.0364681	-0.0311179	0	negative	110.242	-3.43051
WBGene00021200	0.0364749	0.0297616	0	positive	91.0122	2.70867
WBGene00020569	0.0366139	-0.141079	0	negative	7.17039	-1.01159
WBGene00013381	0.0367321	0.0308698	0	positive	72.8576	2.2491
WBGene00010833	0.036767	0.126902	0	positive	5.82442	0.739132
WBGene00017074	0.036768	-0.0449159	0	negative	53.063	-2.38337
WBGene00077658	0.0367723	-0.0563835	0	negative	33.4417	-1.88556
WBGene00008311	0.0368785	-0.0419531	0	negative	38.3781	-1.61008
WBGene00021466	0.0368959	0.0103541	0	positive	234.326	2.42624
WBGene00002262	0.0369077	-0.00820499	0	negative	124.695	-1.02312
WBGene00019609	0.0371372	0.152596	0	positive	5.58305	0.85195
WBGene00017506	0.03727	0.0308162	0	positive	44.954	1.38531
WBGene00007175	0.0372735	0.0422638	0	positive	46.4142	1.96164
WBGene00021047	0.0372751	0.0536561	0	positive	42.6999	2.29111
WBGene00015167	0.0373293	-0.132611	0	negative	6.42666	-0.852247
WBGene00013576	0.0373469	-0.0608498	0	negative	29.2351	-1.77895
WBGene00013441	0.0374556	0.0307533	0	positive	105.831	3.25464
WBGene00012767	0.0375444	0.0373222	0	positive	66.9403	2.49836
WBGene00015791	0.0375468	-0.045719	0	negative	29.4226	-1.34517
WBGene00009518	0.0375663	-0.11999	0	negative	5.59251	-0.671046
WBGene00004181	0.0375995	-0.022267	0	negative	203.893	-4.54009
WBGene00015076	0.0376394	0.208016	0	positive	2.00182	0.41641
WBGene00017658	0.0376398	-0.0398096	0	negative	21.8744	-0.87081
WBGene00011940	0.0376911	-0.0140011	0	negative	161.829	-2.2658
WBGene00013042	0.0377573	0.151341	0	positive	5.69176	0.861398
WBGene00004086	0.0378335	-0.0235582	0	negative	133.023	-3.1338
WBGene00000885	0.0378856	-0.0383406	0	negative	66.3049	-2.54217
WBGene00019890	0.0378991	0.0150286	0	positive	212.532	3.19406
WBGene00004876	0.0379969	-0.111527	0	negative	12.6358	-1.40923
WBGene00017864	0.0380934	0.0217236	0	positive	196.071	4.25937
WBGene00013020	0.038111	0.0607506	0	positive	26.6161	1.61694
WBGene00018259	0.038143	-0.144066	0	negative	5.75167	-0.82862
WBGene00019955	0.0381703	-0.146784	0	negative	6.936	-1.01809
WBGene00016353	0.0382126	-0.0555509	0	negative	40.502	-2.24993
WBGene00021286	0.0382534	0.0155501	0	positive	164.533	2.55849
WBGene00000680	0.0383176	0.00224403	0	positive	741.134	1.66312
WBGene00044324	0.0383939	-0.0167175	0	negative	117.556	-1.96523
WBGene00011815	0.0384583	-0.0324359	0	negative	120.219	-3.89943
WBGene00000804	0.0384936	0.0262217	0	positive	100.698	2.64048
WBGene00019771	0.0384972	-0.0365096	0	negative	93.646	-3.41897
WBGene00018682	0.0386045	0.0764423	0	positive	11.7372	0.897221
WBGene00004452	0.0386089	0.00243445	0	positive	619.402	1.5079
WBGene00022172	0.0386748	0.0743062	0	positive	27.7476	2.06182
WBGene00008343	0.0387882	-0.0343886	0	negative	58.3486	-2.00653
WBGene00010704	0.0388836	0.0946573	0	positive	11.806	1.11752
WBGene00009322	0.0388867	-0.0279834	0	negative	115.524	-3.23277
WBGene00004318	0.0389774	0.0284553	0	positive	82.8339	2.35706
WBGene00021840	0.0391252	0.0608153	0	positive	32.8707	1.99904
WBGene00004985	0.0391451	0.0304217	0	positive	57.5528	1.75086
WBGene00012258	0.039149	-0.0469701	0	negative	70.1307	-3.29405
WBGene00006580	0.0392613	-0.0809313	0	negative	10.2136	-0.826598
WBGene00010042	0.0393601	0.0358132	0	positive	66.3247	2.3753
WBGene00020475	0.0394026	0.0414594	0	positive	44.7503	1.85532
WBGene00001436	0.039408	-0.0792779	0	negative	11.8826	-0.942031
WBGene00022335	0.039437	0.0653794	0	positive	28.7768	1.88141
WBGene00007892	0.0394584	-0.0774604	0	negative	12.868	-0.996762
WBGene00001112	0.0395221	-0.0232313	0	negative	113.409	-2.63465
WBGene00004138	0.039547	-0.0192894	0	negative	128.642	-2.48144
WBGene00008149	0.0396472	0.0189942	0	positive	217.305	4.12754
WBGene00010942	0.0398177	0.035823	0	positive	93.5759	3.35217
WBGene00022193	0.0398351	0.0437634	0	positive	63.5987	2.7833
WBGene00011739	0.0398655	0.0549304	0	positive	39.0349	2.1442
WBGene00017996	0.0398923	-0.0275057	0	negative	102.211	-2.8114
WBGene00016134	0.0399766	-0.0388591	0	negative	59.444	-2.30994
WBGene00021692	0.0401029	-0.139126	0	negative	8.85619	-1.23213
WBGene00004303	0.0401246	0.0214022	0	positive	130.405	2.79096
WBGene00021512	0.0401445	0.0405471	0	positive	63.7297	2.58405
WBGene00017098	0.0401519	0.0138741	0	positive	168.683	2.34033
WBGene00012674	0.0402792	0.0640963	0	positive	29.2808	1.87679
WBGene00015650	0.0402836	-0.0419198	0	negative	46.6258	-1.95454
WBGene00011645	0.0403201	-0.0225578	0	negative	55.4938	-1.25182
WBGene00022787	0.0403433	-0.0256538	0	negative	105.315	-2.70173
WBGene00002131	0.0403683	-0.0751672	0	negative	22.8464	-1.7173
WBGene00017027	0.040435	0.134768	0	positive	5.23335	0.705285
WBGene00020402	0.040604	-0.0416139	0	negative	47.0372	-1.9574
WBGene00303019	0.040626	-0.0564062	0	negative	33.9025	-1.91231
WBGene00016235	0.0406794	-0.0127032	0	negative	279.03	-3.54457
WBGene00000168	0.0407631	0.0176383	0	positive	152.471	2.68933
WBGene00022195	0.0408067	0.0603156	0	positive	32.3919	1.95373
WBGene00003065	0.0408544	-0.0303171	0	negative	95.413	-2.89264
WBGene00003171	0.0408891	0.12096	0	positive	7.03786	0.851298
WBGene00008229	0.0408965	0.0447804	0	positive	26.3424	1.17962
WBGene00006555	0.0409527	-0.0454926	0	negative	30.7212	-1.39759
WBGene00018145	0.0409994	0.0107586	0	positive	187.021	2.01209
WBGene00019564	0.0411673	0.136043	0	positive	1.98891	0.270578
WBGene00013140	0.0412017	0.0500487	0	positive	55.1966	2.76252
WBGene00044651	0.0412807	0.0497812	0	positive	23.6075	1.17521
WBGene00004092	0.0413062	0.153209	0	positive	3.0786	0.471667
WBGene00008218	0.0413903	0.00333046	0	positive	1269.9	4.22936
WBGene00007315	0.0414478	0.054044	0	positive	23.7245	1.28217
WBGene00044107	0.0415521	0.0652796	0	positive	15.695	1.02456
WBGene00013647	0.0416608	0.0202047	0	positive	74.6334	1.50794
WBGene00004969	0.0418582	0.124053	0	positive	6.90015	0.855983
WBGene00015116	0.0418656	0.0424249	0	positive	33.7338	1.43116
WBGene00000283	0.0418675	-0.0643689	0	negative	25.2618	-1.62608
WBGene00012600	0.0418806	0.0290834	0	positive	91.0811	2.64895
WBGene00016542	0.0419256	0.136358	0	positive	7.39629	1.00854
WBGene00007993	0.0419307	-0.0307966	0	negative	92.9184	-2.86157
WBGene00019766	0.0419488	0.0237162	0	positive	87.3208	2.07092
WBGene00021442	0.0420434	0.0352278	0	positive	73.2405	2.5801
WBGene00020964	0.0420466	0.028707	0	positive	67.7229	1.94412
WBGene00013319	0.042141	-0.103989	0	negative	11.5892	-1.20515
WBGene00013014	0.0422836	-0.0532597	0	negative	49.1381	-2.61708
WBGene00013177	0.042488	0.0479932	0	positive	45.8005	2.19811
WBGene00004681	0.0426157	0.0235592	0	positive	160.809	3.78853
WBGene00000274	0.0427361	0.0371218	0	positive	78.9466	2.93064
WBGene00015423	0.042783	-0.176539	0	negative	4.4985	-0.79416
WBGene00004801	0.0428492	-0.108675	0	negative	11.175	-1.21444
WBGene00021201	0.042882	-0.111268	0	negative	11.8516	-1.3187
WBGene00044236	0.0429822	0.0976961	0	positive	12.6184	1.23277
WBGene00022737	0.0431351	0.0555926	0	positive	40.6692	2.26091
WBGene00018674	0.0431601	-0.0535173	0	negative	36.2576	-1.94041
WBGene00018161	0.0431715	-0.0331189	0	negative	101.076	-3.34754
WBGene00019211	0.0431901	-0.0316909	0	negative	46.5078	-1.47387
WBGene00005000	0.0431917	0.0746479	0	positive	13.5514	1.01158
WBGene00013895	0.0432235	-0.134578	0	negative	6.99694	-0.941633
WBGene00009369	0.0433461	0.0464824	0	positive	54.4732	2.53205
WBGene00001215	0.0435059	-0.0197901	0	negative	114.973	-2.27533
WBGene00019978	0.0435541	0.0220006	0	positive	44.0169	0.968398
WBGene00011614	0.0435982	-0.0519983	0	negative	37.4176	-1.94565
WBGene00010348	0.0437055	0.111672	0	positive	8.08766	0.903168
WBGene00003964	0.0437679	0.00286419	0	positive	786.61	2.25301
WBGene00008080	0.0439135	-0.0295751	0	negative	84.5423	-2.50034
WBGene00021320	0.0439332	-0.183394	0	negative	4.23537	-0.77674
WBGene00011279	0.0440178	-0.0165276	0	negative	97.5493	-1.61226
WBGene00018519	0.0440484	0.00192295	0	positive	928.701	1.78584
WBGene00021534	0.0441005	-0.0217413	0	negative	157.665	-3.42784
WBGene00001972	0.0441142	-0.0151584	0	negative	132.431	-2.00744
WBGene00016271	0.0441855	0.0100544	0	positive	96.127	0.966497
WBGene00022114	0.0443023	-0.00530595	0	negative	413.591	-2.19449
WBGene00012126	0.0444047	0.027031	0	positive	131.702	3.56005
WBGene00004806	0.0445165	0.0236176	0	positive	148.506	3.50736
WBGene00003514	0.0446719	-0.0340917	0	negative	49.1808	-1.67666
WBGene00011823	0.0446848	0.0889749	0	positive	10.9251	0.972059
WBGene00000390	0.0446865	-0.00667359	0	negative	277.521	-1.85206
WBGene00045419	0.0447365	-0.0278807	0	negative	99.4663	-2.77319
WBGene00017011	0.0447807	-0.0145196	0	negative	140.769	-2.04391
WBGene00021850	0.0449084	-0.161684	0	negative	3.52173	-0.569408
WBGene00004270	0.0449373	0.0661776	0	positive	30.0897	1.99126
WBGene00000965	0.0449638	-0.0337615	0	negative	81.3472	-2.7464
WBGene00008654	0.0451436	0.0470661	0	positive	26.7878	1.2608
WBGene00004495	0.0452529	0.00373837	0	positive	662.522	2.47675
WBGene00007194	0.0452906	-0.0796666	0	negative	21.7255	-1.7308
WBGene00013463	0.0453451	0.00872348	0	positive	278.851	2.43255
WBGene00001333	0.0454125	-0.00762807	0	negative	335.837	-2.56178
WBGene00019893	0.0454232	-0.0089166	0	negative	330.244	-2.94465
WBGene00007372	0.0454351	0.104754	0	positive	7.02092	0.735469
WBGene00007761	0.0457411	0.0197942	0	positive	134.375	2.65985
WBGene00014000	0.0458167	0.0475151	0	positive	24.2977	1.15451
WBGene00000179	0.0458873	-0.0559703	0	negative	30.9434	-1.73191
WBGene00011994	0.0460161	-0.0225946	0	negative	144.126	-3.25646
WBGene00006577	0.0460212	-0.015456	0	negative	96.639	-1.49365
WBGene00021797	0.0460246	0.161922	0	positive	2.60287	0.421461
WBGene00015956	0.0460819	-0.0397241	0	negative	58.4565	-2.32213
WBGene00004308	0.0463008	-0.0257636	0	negative	68.4941	-1.76465
WBGene00006943	0.0463086	-0.0229477	0	negative	107.672	-2.47083
WBGene00003056	0.0463449	0.0689501	0	positive	21.9517	1.51357
WBGene00011687	0.0463914	0.0176264	0	positive	158.883	2.80053
WBGene00021935	0.0464002	0.0606391	0	positive	26.093	1.58225
WBGene00012675	0.0464977	0.0453409	0	positive	47.1333	2.13706
WBGene00006530	0.0465199	0.0302815	0	positive	40.1403	1.21551
WBGene00020207	0.0465282	0.0470103	0	positive	36.8927	1.73433
WBGene00003421	0.0465633	0.0406057	0	positive	57.6675	2.34163
WBGene00008514	0.0469502	0.03155	0	positive	75.654	2.38688
WBGene00022309	0.0469551	0.132632	0	positive	8.53453	1.13195
WBGene00009620	0.0471473	0.134118	0	positive	5.26072	0.705557
WBGene00011300	0.0474006	0.0162829	0	positive	176.971	2.8816
WBGene00003835	0.0474375	0.0499037	0	positive	60.2247	3.00544
WBGene00007789	0.0476655	-0.0554591	0	negative	45.7623	-2.53793
WBGene00011935	0.0476936	0.100673	0	positive	13.1224	1.32106
WBGene00002055	0.047737	-0.106778	0	negative	10.174	-1.08636
WBGene00002223	0.0477855	0.0245852	0	positive	99.387	2.44345
WBGene00014080	0.0478664	-0.0793304	0	negative	19.1588	-1.51987
WBGene00016335	0.0478868	0.118459	0	positive	7.67597	0.909289
WBGene00016438	0.048017	0.10833	0	positive	13.7084	1.48502
WBGene00044614	0.0480721	0.0445856	0	positive	32.5239	1.4501
WBGene00011747	0.0481486	0.0183227	0	positive	167.528	3.06956
WBGene00006945	0.0482461	0.0260522	0	positive	93.1671	2.42721
WBGene00015433	0.0482721	-0.0712206	0	negative	9.8702	-0.702962
WBGene00008019	0.0482785	0.0822657	0	positive	13.6245	1.12083
WBGene00016376	0.0483301	0.0295561	0	positive	64.5054	1.90653
WBGene00004117	0.0483331	0.247985	0	positive	0.930454	0.230739
WBGene00004076	0.0484449	0.0130066	0	positive	249.157	3.24069
WBGene00009270	0.0484923	0.0191774	0	positive	151.914	2.91332
WBGene00007848	0.0485503	0.0350995	0	positive	43.2422	1.51778
WBGene00014669	0.0486497	-0.104156	0	negative	12.0021	-1.25009
WBGene00003229	0.0487482	-0.00384404	0	negative	624.125	-2.39916
WBGene00011560	0.0489309	0.0166377	0	positive	280.429	4.66568
WBGene00007043	0.0490578	-0.0372577	0	negative	49.5115	-1.84469
WBGene00000509	0.0491338	-0.0286336	0	negative	76.6636	-2.19515
WBGene00015400	0.0491345	0.0271546	0	positive	28.2232	0.766392
WBGene00018353	0.0491436	0.150288	0	positive	3.83212	0.575922
WBGene00303208	0.0491472	-0.100388	0	negative	11.0456	-1.10884
WBGene00018964	0.0491615	0.0497751	0	positive	54.0865	2.69216
WBGene00019323	0.0491808	0.0196007	0	positive	132.722	2.60145
WBGene00012361	0.0492408	0.0354584	0	positive	44.8323	1.58968
WBGene00003480	0.0492668	0.105411	0	positive	9.13397	0.962824
WBGene00020933	0.0492815	-0.0248929	0	negative	128.233	-3.19209
WBGene00016396	0.0492923	-0.166047	0	negative	3.51947	-0.584396
WBGene00012156	0.0493287	0.0257152	0	positive	134.93	3.46976
WBGene00011972	0.0493666	-0.0204466	0	negative	115.785	-2.36742
WBGene00019361	0.0494199	0.0609132	0	positive	26.1092	1.5904
WBGene00006861	0.0494544	-0.046448	0	negative	31.0417	-1.44183
WBGene00022279	0.0496985	-0.0462646	0	negative	32.768	-1.516
WBGene00000237	0.0497157	0.121808	0	positive	8.3564	1.01787
WBGene00010471	0.0497698	0.0494674	0	positive	41.5893	2.05732
WBGene00006220	0.0498101	0.101609	0	positive	12.1745	1.23704
WBGene00010840	0.0500481	0.0189822	0	positive	82.9871	1.57528
WBGene00044638	0.0501487	0.0151785	0	positive	64.7647	0.983032
WBGene00018349	0.0502158	0.0636145	0	positive	25.2672	1.60736
WBGene00044389	0.0503359	0.219081	0	positive	2.88381	0.631787
WBGene00013432	0.0504518	-0.0806449	0	negative	22.3589	-1.80313
WBGene00003837	0.0504832	-0.120934	0	negative	7.48945	-0.905729
WBGene00004272	0.0505805	-0.0194027	0	negative	120.065	-2.32958
WBGene00011631	0.0506578	0.0303978	0	positive	81.8712	2.4887
WBGene00021314	0.0507004	0.125964	0	positive	9.13845	1.15112
WBGene00000215	0.0507364	-0.00405891	0	negative	601.989	-2.44342
WBGene00007333	0.0509187	0.00984162	0	positive	291.093	2.86482
WBGene00044773	0.0509426	0.0368137	0	positive	29.0982	1.07121
WBGene00006791	0.0509659	-0.011284	0	negative	172.235	-1.94351
WBGene00007900	0.0512713	0.12396	0	positive	4.92054	0.609952
WBGene00044789	0.0513528	-0.017125	0	negative	88.4821	-1.51526
WBGene00003660	0.0514119	-0.111786	0	negative	11.0938	-1.24013
WBGene00000716	0.0514329	0.0012488	0	positive	1153.55	1.44056
WBGene00010605	0.0514564	-0.00804151	0	negative	241.605	-1.94287
WBGene00022420	0.0515026	-0.0126311	0	negative	229.483	-2.89861
WBGene00044251	0.0516775	-0.140432	0	negative	7.57217	-1.06338
WBGene00018305	0.0517378	0.0422631	0	positive	42.1941	1.78325
WBGene00022836	0.0517414	0.0273925	0	positive	97.0184	2.65757
WBGene00001036	0.051822	-0.0380588	0	negative	49.9304	-1.90029
WBGene00004095	0.0518535	-0.0137966	0	negative	236.273	-3.25977
WBGene00017830	0.051936	0.0279214	0	positive	82.9804	2.31693
WBGene00000366	0.0520016	0.013822	0	positive	163.271	2.25673
WBGene00004010	0.0520447	0.0766655	0	positive	10.9326	0.83815
WBGene00016961	0.0522421	0.0244091	0	positive	166.399	4.06163
WBGene00007417	0.0523443	-0.0644112	0	negative	28.5389	-1.83823
WBGene00015703	0.0524177	0.0349581	0	positive	48.7283	1.70345
WBGene00018819	0.052438	0.0267068	0	positive	88.8109	2.37186
WBGene00015800	0.0524905	0.0617392	0	positive	30.0811	1.85718
WBGene00008317	0.0527432	-0.0544543	0	negative	34.1368	-1.8589
WBGene00012476	0.0527627	0.187122	0	positive	4.708	0.880969
WBGene00017759	0.0527803	0.0130852	0	positive	201.535	2.63713
WBGene00008113	0.0529958	0.0593993	0	positive	12.261	0.728292
WBGene00001505	0.0530454	0.1581	0	positive	6.2843	0.993548
WBGene00019511	0.0531479	-0.0387364	0	negative	45.4911	-1.76216
WBGene00011428	0.0532899	-0.126905	0	negative	6.54277	-0.830309
WBGene00012936	0.0533203	0.017325	0	positive	178.588	3.09403
WBGene00006812	0.0533721	0.159097	0	positive	4.5718	0.727362
WBGene00021061	0.0534719	0.032756	0	positive	65.3181	2.13956
WBGene00016957	0.0536403	0.0287719	0	positive	48.4616	1.39433
WBGene00010135	0.0536563	-0.0357847	0	negative	32.2523	-1.15414
WBGene00007458	0.0540607	0.00374382	0	positive	387.422	1.45044
WBGene00021856	0.05416	0.0306653	0	positive	56.0224	1.71794
WBGene00011870	0.0542145	0.0824528	0	positive	10.4832	0.864372
WBGene00023068	0.0542199	0.00125253	0	positive	969.492	1.21432
WBGene00000566	0.0543311	0.0342976	0	positive	69.5105	2.38404
WBGene00021977	0.0544483	0.0951056	0	positive	6.51507	0.61962
WBGene00007707	0.054768	-0.0132645	0	negative	161.516	-2.14243
WBGene00044440	0.054834	0.0782722	0	positive	17.6307	1.37999
WBGene00000111	0.0549075	0.0959571	0	positive	7.07158	0.678568
WBGene00017036	0.0550392	-0.15938	0	negative	3.41748	-0.544679
WBGene00020273	0.0551928	0.0456166	0	positive	40.6953	1.85638
WBGene00004929	0.0553647	-0.0690478	0	negative	23.8979	-1.6501
WBGene00019943	0.0556353	-0.0180768	0	negative	101.018	-1.82608
WBGene00015088	0.0557844	0.0862757	0	positive	12.0864	1.04276
WBGene00010648	0.0557917	-0.0813271	0	negative	11.6549	-0.947858
WBGene00000292	0.0558981	-0.0279504	0	negative	152.12	-4.25183
WBGene00013347	0.0559398	0.0224621	0	positive	103.741	2.33025
WBGene00023451	0.0560903	0.101837	0	positive	12.9241	1.31616
WBGene00011487	0.0561109	-0.0103736	0	negative	196.628	-2.03973
WBGene00006852	0.0561354	0.161188	0	positive	2.06914	0.333521
WBGene00009218	0.056163	-0.116791	0	negative	9.01567	-1.05295
WBGene00022296	0.056205	0.0132758	0	positive	128.304	1.70335
WBGene00010470	0.0564189	0.0584914	0	positive	12.6774	0.741516
WBGene00008862	0.0565645	-0.141738	0	negative	3.72153	-0.527483
WBGene00003802	0.0567049	0.0183618	0	positive	163.178	2.99624
WBGene00013704	0.056783	0.0820443	0	positive	10.7404	0.881187
WBGene00017485	0.05685	0.0282319	0	positive	33.4761	0.945094
WBGene00004419	0.0568705	-0.00259139	0	negative	1322.2	-3.42634
WBGene00017962	0.0569124	0.0241015	0	positive	46.5757	1.12254
WBGene00045249	0.0569455	0.0935508	0	positive	11.1091	1.03927
WBGene00019509	0.0569703	-0.063259	0	negative	28.2242	-1.78544
WBGene00009505	0.057027	-0.0256939	0	negative	114.355	-2.93824
WBGene00009048	0.0570996	-0.0384939	0	negative	21.2867	-0.819408
WBGene00019803	0.0571101	0.0837951	0	positive	13.6767	1.14604
WBGene00007593	0.0571146	0.0727425	0	positive	16.2214	1.17999
WBGene00013103	0.0572143	0.0698162	0	positive	20.6325	1.44048
WBGene00010806	0.0572193	-0.00818305	0	negative	230.52	-1.88636
WBGene00015510	0.0573778	0.0572935	0	positive	24.7033	1.41534
WBGene00020160	0.0574929	0.0169834	0	positive	24.1885	0.410802
WBGene00017501	0.0576359	0.0220577	0	positive	6.79913	0.149973
WBGene00007681	0.0578277	0.0190907	0	positive	159.586	3.04661
WBGene00003132	0.0578431	0.01888	0	positive	187.668	3.54316
WBGene00011206	0.0578627	0.0422448	0	positive	37.1577	1.56972
WBGene00000982	0.0578753	0.0441725	0	positive	35.1765	1.55383
WBGene00008688	0.0579086	0.0288623	0	positive	70.43	2.03277
WBGene00014222	0.0579367	0.0453484	0	positive	45.7735	2.07575
WBGene00010428	0.0580627	-0.0167232	0	negative	161.419	-2.69945
WBGene00000020	0.0580639	0.127694	0	positive	7.94674	1.01475
WBGene00019003	0.0581598	0.0305007	0	positive	56.4617	1.72212
WBGene00016592	0.0581784	-0.051457	0	negative	44.3636	-2.28282
WBGene00004916	0.0582438	0.0142614	0	positive	158.475	2.26007
WBGene00000556	0.0582971	0.132082	0	positive	1.64979	0.217907
WBGene00002190	0.0583248	-0.0134392	0	negative	99.8675	-1.34214
WBGene00021933	0.0583273	0.0406418	0	positive	38.9408	1.58263
WBGene00020558	0.0583406	-0.0178605	0	negative	160.554	-2.86758
WBGene00006917	0.0584629	-0.00684783	0	negative	375.767	-2.57319
WBGene00003405	0.0585808	0.0215419	0	positive	155.173	3.34273
WBGene00008053	0.0587826	0.00628195	0	positive	566.91	3.5613
WBGene00019576	0.0588403	-0.101248	0	negative	13.1741	-1.33384
WBGene00007007	0.0590431	-0.0716482	0	negative	28.6101	-2.04986
WBGene00016234	0.0590701	0.103914	0	positive	10.6194	1.1035
WBGene00007712	0.0591047	0.0423334	0	positive	55.8204	2.36307
WBGene00012796	0.0591453	0.155757	0	positive	3.8133	0.593949
WBGene00002054	0.0591522	-0.0431403	0	negative	40.3386	-1.74022
WBGene00012112	0.0591532	0.0398329	0	positive	51.6766	2.05843
WBGene00008422	0.0591802	0.0308698	0	positive	46.5306	1.43639
WBGene00017546	0.0591954	0.0115665	0	positive	367.399	4.24952
WBGene00003919	0.0592198	0.0291404	0	positive	51.7609	1.50833
WBGene00021783	0.0593729	-0.050135	0	negative	41.7732	-2.0943
WBGene00003883	0.0595887	0.147846	0	positive	5.75511	0.850869
WBGene00007705	0.059893	-0.020144	0	negative	121.16	-2.44065
WBGene00008419	0.0599399	-0.0322187	0	negative	106.92	-3.44482
WBGene00006833	0.0599453	-0.00945956	0	negative	215.246	-2.03613
WBGene00009219	0.0599491	0.0531107	0	positive	23.7863	1.26331
WBGene00001115	0.060027	-0.117778	0	negative	6.67849	-0.786578
WBGene00002010	0.0601213	-0.0016572	0	negative	1019.31	-1.6892
WBGene00012665	0.0601516	-0.025875	0	negative	97.8436	-2.5317
WBGene00016960	0.0602982	0.0315953	0	positive	85.7599	2.70961
WBGene00044296	0.0603856	0.101601	0	positive	8.50547	0.864167
WBGene00004917	0.0606901	0.013792	0	positive	217.71	3.00265
WBGene00021735	0.0606914	0.0352261	0	positive	81.8095	2.88183
WBGene00004858	0.0608139	-0.115643	0	negative	8.25956	-0.955159
WBGene00011016	0.0608235	-0.00941606	0	negative	208.678	-1.96493
WBGene00018830	0.060865	-0.0235094	0	negative	114.942	-2.70223
WBGene00012104	0.0608681	-0.00746352	0	negative	216.033	-1.61237
WBGene00004307	0.0608715	-0.00445289	0	negative	208.489	-0.928376
WBGene00003791	0.0608982	0.0231741	0	positive	125.243	2.90239
WBGene00020311	0.0609177	0.0425168	0	positive	46.3551	1.97087
WBGene00010280	0.0610299	0.0154085	0	positive	174.427	2.68765
WBGene00003600	0.0611519	-0.0510947	0	negative	30.8415	-1.57584
WBGene00017108	0.0612533	-0.0906696	0	negative	13.4003	-1.215
WBGene00001688	0.0612988	0.0746124	0	positive	27.5976	2.05912
WBGene00012880	0.0613359	0.0477706	0	positive	14.0841	0.672807
WBGene00044472	0.0613362	0.176617	0	positive	0.295332	0.0521607
WBGene00009429	0.0617343	0.0564455	0	positive	3.71667	0.20979
WBGene00000098	0.0618949	-0.0109113	0	negative	280.977	-3.06582
WBGene00022250	0.0619026	-0.0583304	0	negative	23.4556	-1.36818
WBGene00000422	0.0619202	0.136303	0	positive	6.2874	0.856992
WBGene00000988	0.0619331	0.0085125	0	positive	114.438	0.97415
WBGene00018877	0.0619369	0.0323919	0	positive	43.4862	1.4086
WBGene00006353	0.0619399	-0.0627142	0	negative	29.0029	-1.81889
WBGene00003771	0.0619421	0.0846188	0	positive	8.26203	0.699123
WBGene00021544	0.0620092	-0.0973304	0	negative	10.286	-1.00114
WBGene00020557	0.06206	-0.0330537	0	negative	67.4895	-2.23078
WBGene00016864	0.0620912	-0.148796	0	negative	4.43309	-0.659627
WBGene00013202	0.0622649	-0.0356602	0	negative	78.3061	-2.79241
WBGene00003955	0.0622794	-0.00552238	0	negative	631.011	-3.48468
WBGene00015814	0.0623296	-0.0142057	0	negative	168.055	-2.38733
WBGene00015476	0.0623368	0.151768	0	positive	4.38355	0.665284
WBGene00255714	0.0623616	0.0398453	0	positive	60.4496	2.40863
WBGene00022378	0.0624893	0.0461016	0	positive	27.9138	1.28687
WBGene00015843	0.0625495	0.0823503	0	positive	16.4554	1.35511
WBGene00011735	0.0625539	0.00834184	0	positive	317.708	2.65027
WBGene00003621	0.0626564	0.0731921	0	positive	19.2009	1.40536
WBGene00022770	0.062668	0.153775	0	positive	4.37385	0.672586
WBGene00016794	0.0627268	-0.0212379	0	negative	105.417	-2.23884
WBGene00008925	0.0628273	0.0438568	0	positive	52.7913	2.31526
WBGene00009512	0.0628773	0.195741	0	positive	2.13675	0.41825
WBGene00009886	0.0629233	-0.0695049	0	negative	22.0328	-1.53139
WBGene00019829	0.0629509	0.14606	0	positive	4.96042	0.72452
WBGene00004788	0.0630173	-0.018776	0	negative	129.499	-2.43146
WBGene00013075	0.0630757	0.0456805	0	positive	38.7178	1.76865
WBGene00018975	0.0632145	0.0310056	0	positive	73.4398	2.27705
WBGene00022372	0.0636009	0.0877692	0	positive	9.81068	0.861075
WBGene00001650	0.0636207	0.136808	0	positive	6.65048	0.909842
WBGene00000723	0.0636516	0.150238	0	positive	3.31759	0.498429
WBGene00004946	0.0636921	0.0227056	0	positive	128.715	2.92255
WBGene00004023	0.0637066	-0.116216	0	negative	7.22747	-0.839945
WBGene00007111	0.0637219	0.0162245	0	positive	157.083	2.5486
WBGene00000066	0.0637494	-0.00188225	0	negative	979.954	-1.84452
WBGene00009743	0.0638947	0.146991	0	positive	1.62863	0.239394
WBGene00185089	0.0640868	-0.103862	0	negative	12.709	-1.31998
WBGene00020247	0.064092	0.121857	0	positive	7.99254	0.973944
WBGene00022037	0.0641695	-0.00411543	0	negative	766.897	-3.15611
WBGene00001811	0.0642041	0.123557	0	positive	9.32001	1.15155
WBGene00004679	0.0643167	0.0121768	0	positive	192.195	2.34032
WBGene00013366	0.0644284	0.134154	0	positive	8.3919	1.1258
WBGene00007001	0.0645	-0.0263049	0	negative	98.3668	-2.58753
WBGene00021082	0.0645536	-0.0590625	0	negative	17.7471	-1.04819
WBGene00008710	0.0645782	0.0131073	0	positive	323.423	4.23921
WBGene00007615	0.0646165	0.0390162	0	positive	48.346	1.88628
WBGene00013931	0.0646696	-0.0502211	0	negative	21.7153	-1.09057
WBGene00006706	0.0647597	0.00993587	0	positive	340.398	3.38215
WBGene00022887	0.0647628	0.0857587	0	positive	7.25597	0.622263
WBGene00018045	0.0648272	0.0457888	0	positive	25.5731	1.17096
WBGene00012457	0.06484	-0.154417	0	negative	3.88065	-0.599239
WBGene00019396	0.064901	-0.0164176	0	negative	108.906	-1.78797
WBGene00003754	0.0650127	-0.113482	0	negative	8.01454	-0.909507
WBGene00015282	0.0650373	0.0253571	0	positive	98.4898	2.49742
WBGene00012641	0.0650913	0.0219055	0	positive	146.358	3.20604
WBGene00022369	0.065204	0.011832	0	positive	231.69	2.74136
WBGene00011242	0.0653652	-0.0290181	0	negative	73.5116	-2.13317
WBGene00018760	0.0654335	-0.104684	0	negative	7.80336	-0.816885
WBGene00003651	0.0654838	-0.115032	0	negative	9.75532	-1.12218
WBGene00004241	0.0654911	-0.00282386	0	negative	1347.97	-3.80648
WBGene00019305	0.0655099	-0.0236077	0	negative	136.032	-3.21139
WBGene00013894	0.0656188	-0.00307311	0	negative	393.004	-1.20774
WBGene00002879	0.0657034	0.020356	0	positive	133.965	2.72698
WBGene00018214	0.0658782	-0.0811761	0	negative	13.7823	-1.1188
WBGene00017482	0.0659005	-0.0122043	0	negative	136.156	-1.66169
WBGene00013674	0.0659489	0.0316302	0	positive	68.5559	2.16844
WBGene00020921	0.0659708	0.0477894	0	positive	18.0351	0.861887
WBGene00016387	0.0661029	-0.0207987	0	negative	91.3114	-1.89916
WBGene00012431	0.0661313	0.0252925	0	positive	22.3726	0.565859
WBGene00021327	0.0661655	0.0388325	0	positive	85.0564	3.30296
WBGene00006408	0.0662437	-0.0251729	0	negative	68.7807	-1.73141
WBGene00011480	0.0663709	-0.00318006	0	negative	687.51	-2.18632
WBGene00008233	0.066422	-0.11782	0	negative	7.56031	-0.890756
WBGene00011482	0.0664522	0.0384196	0	positive	35.2306	1.35355
WBGene00002037	0.0664595	0.0697976	0	positive	20.427	1.42576
WBGene00008677	0.0664654	-0.028009	0	negative	44.2324	-1.2389
WBGene00016064	0.0665099	-0.213883	0	negative	0.693034	-0.148228
WBGene00012658	0.0666147	0.0539506	0	positive	30.2128	1.63
WBGene00002152	0.0666564	0.0104977	0	positive	186.685	1.95976
WBGene00021444	0.0666948	0.0377915	0	positive	43.353	1.63838
WBGene00016055	0.0667718	-0.0310341	0	negative	75.0632	-2.32952
WBGene00003655	0.0668366	-0.173702	0	negative	5.12089	-0.889509
WBGene00003218	0.0669271	-0.00932621	0	negative	202.306	-1.88675
WBGene00015102	0.0669576	-0.00128445	0	negative	3070.47	-3.94387
WBGene00000761	0.0669662	-0.0411489	0	negative	57.1767	-2.35276
WBGene00006061	0.0673101	-0.0249319	0	negative	102.784	-2.5626
WBGene00019259	0.0673257	0.00791528	0	positive	240.055	1.9001
WBGene00000767	0.0674341	-0.0202258	0	negative	117.068	-2.36779
WBGene00017358	0.0675301	0.0406184	0	positive	51.1832	2.07898
WBGene00001082	0.0676553	-0.0409002	0	negative	52.3204	-2.13992
WBGene00011688	0.0677313	-0.0263367	0	negative	83.4546	-2.19792
WBGene00015164	0.0678379	-0.0235599	0	negative	79.5697	-1.87466
WBGene00011803	0.0678423	-0.041619	0	negative	26.0886	-1.08578
WBGene00008119	0.0678776	-0.0339727	0	negative	81.0112	-2.75217
WBGene00017362	0.0680087	0.0421111	0	positive	41.8834	1.76376
WBGene00008078	0.0680529	0.0768385	0	positive	16.2343	1.24742
WBGene00009334	0.0682161	-0.0345742	0	negative	45.0922	-1.55903
WBGene00008413	0.068279	0.030105	0	positive	64.9842	1.95635
WBGene00000121	0.0684165	0.00784148	0	positive	375.501	2.94449
WBGene00004489	0.0684655	0.00440607	0	positive	508.326	2.23972
WBGene00013591	0.0684974	-0.0353495	0	negative	62.484	-2.20877
WBGene00018610	0.0685704	0.034901	0	positive	81.9673	2.86074
WBGene00022721	0.0685744	-0.029022	0	negative	46.9991	-1.36401
WBGene00004743	0.0686456	0.0275647	0	positive	100.604	2.77313
WBGene00017751	0.068684	-0.0894734	0	negative	13.6791	-1.22392
WBGene00009337	0.0687017	0.106823	0	positive	9.33313	0.996994
WBGene00013269	0.0689491	0.0475518	0	positive	36.6995	1.74513
WBGene00018967	0.0689561	0.0211629	0	positive	172.486	3.65029
WBGene00017064	0.0690456	-0.0268023	0	negative	113.058	-3.03022
WBGene00000479	0.0690669	-0.000931624	0	negative	2467.44	-2.29873
WBGene00007788	0.0690786	-0.0357471	0	negative	57.1325	-2.04232
WBGene00011872	0.0690868	0.0528197	0	positive	26.7896	1.41502
WBGene00018343	0.0691061	-0.0243696	0	negative	15.4005	-0.375302
WBGene00004032	0.0691307	-0.00697549	0	negative	156.321	-1.09041
WBGene00001683	0.0692247	0.00556852	0	positive	372.91	2.07656
WBGene00001232	0.0692604	-0.0144428	0	negative	202.183	-2.92009
WBGene00010660	0.0696867	0.0188913	0	positive	50.3259	0.950721
WBGene00014057	0.0698731	-0.0690846	0	negative	10.4558	-0.722333
WBGene00002181	0.0700732	0.0706728	0	positive	5.97936	0.422578
WBGene00010783	0.0701382	0.0516396	0	positive	25.6339	1.32372
WBGene00013697	0.0701574	-0.021125	0	negative	80.368	-1.69778
WBGene00011813	0.0701834	-0.0341716	0	negative	49.1289	-1.67881
WBGene00004208	0.0702122	0.00361153	0	positive	569.044	2.05512
WBGene00009445	0.07023	0.0209631	0	positive	105.194	2.2052
WBGene00021648	0.0702526	-0.0374255	0	negative	64.7596	-2.42366
WBGene00009004	0.0702645	0.0223064	0	positive	91.7091	2.0457
WBGene00018174	0.070474	0.053495	0	positive	19.3196	1.0335
WBGene00007500	0.0706029	0.0127015	0	positive	247.653	3.14558
WBGene00011490	0.0706702	-0.0245668	0	negative	75.2179	-1.84787
WBGene00004759	0.0708333	0.0198289	0	positive	180.826	3.58557
WBGene00007878	0.0709273	-0.109882	0	negative	9.5467	-1.04901
WBGene00013079	0.0709783	0.0681353	0	positive	4.12469	0.281037
WBGene00007652	0.0710079	0.226821	0	positive	2.47554	0.561504
WBGene00010194	0.0710425	0.040391	0	positive	46.078	1.86114
WBGene00017498	0.071124	0.0473362	0	positive	2.17291	0.102857
WBGene00007449	0.07116	0.0617833	0	positive	10.1253	0.625576
WBGene00022748	0.0713539	-0.00575658	0	negative	354.1	-2.03841
WBGene00007979	0.0713553	-0.00542975	0	negative	342.52	-1.8598
WBGene00011323	0.0714301	-0.0372972	0	negative	66.3822	-2.47587
WBGene00002083	0.0715152	-0.00364777	0	negative	802.573	-2.9276
WBGene00020919	0.0715787	-0.0651314	0	negative	17.8749	-1.16421
WBGene00021828	0.0716701	0.0244543	0	positive	80.5314	1.96934
WBGene00018595	0.0717184	0.0991783	0	positive	7.64186	0.757907
WBGene00023492	0.0717404	0.126432	0	positive	4.50337	0.569371
WBGene00006764	0.0719231	0.00348355	0	positive	403.23	1.40467
WBGene00008266	0.0719626	0.0227116	0	positive	106.404	2.4166
WBGene00021035	0.0719813	-0.00218177	0	negative	716.161	-1.5625
WBGene00015096	0.0721371	-0.0627761	0	negative	12.1699	-0.763978
WBGene00003370	0.0721804	0.00347172	0	positive	403.627	1.40128
WBGene00015141	0.0722855	-0.041102	0	negative	33.091	-1.36011
WBGene00009008	0.0722889	0.0739961	0	positive	15.587	1.15337
WBGene00013354	0.072316	0.0146847	0	positive	130.373	1.91448
WBGene00011859	0.0723172	0.0635666	0	positive	21.1737	1.34594
WBGene00013164	0.0728771	0.0324291	0	positive	59.0372	1.91452
WBGene00012276	0.0728992	-0.0125999	0	negative	185.104	-2.3323
WBGene00000109	0.0729602	0.0308703	0	positive	69.5493	2.147
WBGene00011869	0.0730477	-0.0189068	0	negative	48.9206	-0.924934
WBGene00010899	0.0730653	0.083125	0	positive	9.02309	0.750045
WBGene00021322	0.0730752	-0.0154977	0	negative	94.6086	-1.46622
WBGene00009200	0.0732768	-0.0199564	0	negative	90.9275	-1.81459
WBGene00012932	0.0732859	0.0376057	0	positive	51.5374	1.9381
WBGene00019918	0.0734118	0.0900988	0	positive	6.45569	0.581649
WBGene00022775	0.0734513	-0.0126171	0	negative	125.646	-1.58529
WBGene00010557	0.0736613	-0.0279044	0	negative	82.331	-2.2974
WBGene00000530	0.073669	-0.0437526	0	negative	37.5547	-1.64312
WBGene00019009	0.0737181	-0.0891743	0	negative	10.6923	-0.953474
WBGene00010676	0.0738134	-0.0214585	0	negative	136.583	-2.93086
WBGene00022678	0.0739652	-0.00862241	0	negative	224.935	-1.93948
WBGene00019018	0.0739797	-0.147144	0	negative	6.96579	-1.02498
WBGene00009187	0.0740386	0.01003	0	positive	189.857	1.90427
WBGene00017826	0.0741707	0.0272623	0	positive	116.623	3.1794
WBGene00021502	0.0741739	-0.0341625	0	negative	46.7467	-1.59699
WBGene00006567	0.0742316	0.0484654	0	positive	60.6649	2.94015
WBGene00016654	0.0742407	-0.0262104	0	negative	87.358	-2.28969
WBGene00009636	0.0743039	0.118701	0	positive	7.56041	0.89743
WBGene00019544	0.0746373	0.0323884	0	positive	77.5576	2.51197
WBGene00007506	0.0747098	0.146089	0	positive	2.0844	0.304508
WBGene00019498	0.0748096	0.0570066	0	positive	31.6577	1.8047
WBGene00004134	0.0748458	-0.0348925	0	negative	30.1439	-1.0518
WBGene00044436	0.074927	-0.117552	0	negative	5.16495	-0.607148
WBGene00012375	0.074945	0.0337158	0	positive	63.0595	2.1261
WBGene00004109	0.0749627	-0.0220693	0	negative	162.403	-3.58411
WBGene00001708	0.0750311	-0.0284425	0	negative	47.6236	-1.35453
WBGene00021165	0.0751041	-0.120053	0	negative	4.68136	-0.56201
WBGene00003387	0.0751062	0.114524	0	positive	9.05964	1.03755
WBGene00003898	0.0751384	0.032581	0	positive	66.6067	2.17012
WBGene00006396	0.0752419	-0.0329376	0	negative	67.2007	-2.21343
WBGene00009300	0.0754742	0.159088	0	positive	4.89973	0.779489
WBGene00009580	0.0755774	0.0300828	0	positive	48.463	1.4579
WBGene00017843	0.0756018	-0.030955	0	negative	80.9613	-2.50616
WBGene00015567	0.0756443	-0.0242422	0	negative	119.464	-2.89606
WBGene00010785	0.075693	0.00557194	0	positive	509.135	2.83687
WBGene00000834	0.0757298	0.0234922	0	positive	110.107	2.58666
WBGene00021702	0.0757632	0.0889744	0	positive	15.467	1.37616
WBGene00007640	0.075867	0.023789	0	positive	87.7366	2.08717
WBGene00022153	0.0760781	0.0363546	0	positive	45.8677	1.6675
WBGene00013210	0.076091	0.0410359	0	positive	52.1828	2.14137
WBGene00004700	0.0760943	-0.00443529	0	negative	457.511	-2.02919
WBGene00009254	0.0760962	-0.0121956	0	negative	173.7	-2.11837
WBGene00016202	0.0761415	0.0207405	0	positive	147.499	3.0592
WBGene00020047	0.0761636	0.124944	0	positive	4.81014	0.600999
WBGene00003568	0.0761637	0.0748959	0	positive	12.3554	0.925371
WBGene00012472	0.0762313	0.0181905	0	positive	114.395	2.08091
WBGene00007474	0.0762627	-0.068907	0	negative	15.5354	-1.0705
WBGene00012904	0.0763261	0.0521034	0	positive	30.7382	1.60157
WBGene00004204	0.076358	-0.0064586	0	negative	411.553	-2.65805
WBGene00013236	0.07653	-0.0456646	0	negative	40.493	-1.8491
WBGene00020218	0.0765447	0.0139988	0	positive	125.844	1.76166
WBGene00009091	0.0765937	0.114922	0	positive	6.185	0.710795
WBGene00016567	0.0766396	-0.0614489	0	negative	24.0576	-1.47831
WBGene00015194	0.0767772	-0.0347407	0	negative	59.1277	-2.05414
WBGene00003528	0.0769984	0.119415	0	positive	6.90634	0.824717
WBGene00000070	0.0772237	0.173899	0	positive	3.686	0.640991
WBGene00017667	0.0772798	0.157067	0	positive	4.20326	0.660195
WBGene00017159	0.07736	0.0315195	0	positive	61.2986	1.9321
WBGene00013189	0.0774984	0.0270437	0	positive	80.1185	2.1667
WBGene00016292	0.077578	0.102277	0	positive	10.5576	1.0798
WBGene00001165	0.0776578	0.0780288	0	positive	10.3879	0.810555
WBGene00007921	0.0777061	0.0371022	0	positive	85.3398	3.16629
WBGene00019105	0.0777688	-0.0458249	0	negative	15.0316	-0.688821
WBGene00004180	0.077826	-0.029499	0	negative	103.901	-3.06498
WBGene00001094	0.0778425	0.0105491	0	positive	251.897	2.65728
WBGene00021901	0.0780287	-0.021336	0	negative	127.747	-2.72561
WBGene00001538	0.0780558	0.0502205	0	positive	28.1194	1.41217
WBGene00004737	0.0781479	0.0298374	0	positive	108.953	3.25088
WBGene00018427	0.0781602	-0.00870315	0	negative	136.047	-1.18403
WBGene00008204	0.0782151	-0.110279	0	negative	5.59008	-0.616466
WBGene00016407	0.0782501	0.0418411	0	positive	21.8729	0.915186
WBGene00007071	0.0783734	-0.0291592	0	negative	48.3239	-1.40909
WBGene00017920	0.0783771	0.0197021	0	positive	142.159	2.80082
WBGene00000536	0.0787954	0.0601015	0	positive	27.8435	1.67344
WBGene00016562	0.0787969	-0.0142816	0	negative	117.991	-1.6851
WBGene00000517	0.0788869	-0.013673	0	negative	92.43	-1.26379
WBGene00001685	0.0789253	0.00693931	0	positive	215.902	1.49821
WBGene00014228	0.0790342	-0.0522317	0	negative	42.507	-2.22021
WBGene00015932	0.0790798	0.0678457	0	positive	1.44135	0.097789
WBGene00000757	0.0791356	0.00161324	0	positive	823.459	1.32844
WBGene00007614	0.0792244	-0.0255811	0	negative	31.3209	-0.801223
WBGene00016274	0.0793068	0.0272631	0	positive	27.0188	0.736616
WBGene00044019	0.0793996	0.072612	0	positive	14.675	1.06558
WBGene00001755	0.0794209	-0.00782337	0	negative	181.14	-1.41713
WBGene00001179	0.0796093	0.106912	0	positive	9.20203	0.983808
WBGene00008990	0.0797736	0.0231817	0	positive	106.063	2.45873
WBGene00016590	0.0798453	0.0955391	0	positive	9.6146	0.91857
WBGene00009051	0.0799096	0.0273527	0	positive	70.8303	1.9374
WBGene00000545	0.0799831	0.0697339	0	positive	21.84	1.52299
WBGene00000751	0.0801811	0.00129738	0	positive	883.416	1.14612
WBGene00001676	0.080242	-0.213299	0	negative	0.485978	-0.103659
WBGene00004773	0.0802516	-0.125661	0	negative	5.75063	-0.722631
WBGene00000158	0.080265	-0.0253143	0	negative	118.92	-3.01038
WBGene00009132	0.080644	0.0268308	0	positive	101.504	2.72342
WBGene00002038	0.0809132	0.0466843	0	positive	34.3255	1.60246
WBGene00017646	0.0812327	-0.0404312	0	negative	60.3854	-2.44145
WBGene00012371	0.0812685	0.0831829	0	positive	9.72802	0.809205
WBGene00012434	0.0812728	-0.0183887	0	negative	66.663	-1.22585
WBGene00015301	0.0812915	-0.021927	0	negative	130.921	-2.87071
WBGene00011339	0.0813725	-0.103835	0	negative	6.24299	-0.648244
WBGene00014206	0.0814652	-0.153287	0	negative	3.13521	-0.480588
WBGene00006470	0.0815018	0.0620314	0	positive	10.3683	0.643162
WBGene00015965	0.0815747	0.0981252	0	positive	10.9954	1.07892
WBGene00000756	0.0815948	0.245747	0	positive	0.0828321	0.0203558
WBGene00015434	0.081674	0.121783	0	positive	8.14997	0.992525
WBGene00000609	0.0818016	0.00122275	0	positive	666.578	0.815057
WBGene00022015	0.0818415	0.0473889	0	positive	41.348	1.95943
WBGene00008320	0.0819515	0.137007	0	positive	5.49962	0.753485
WBGene00014205	0.0820739	0.0512273	0	positive	29.8221	1.52771
WBGene00002280	0.0820869	-0.00463644	0	negative	347.695	-1.61207
WBGene00194641	0.0821349	0.133857	0	positive	6.07219	0.812806
WBGene00003829	0.0822092	0.0177619	0	positive	154.341	2.7414
WBGene00011190	0.0822901	0.0384325	0	positive	8.58303	0.329868
WBGene00018488	0.0824378	0.0111465	0	positive	171.399	1.9105
WBGene00018987	0.0824607	0.0860581	0	positive	15.744	1.3549
WBGene00012696	0.0825356	0.064444	0	positive	23.5536	1.51789
WBGene00018951	0.0828195	-0.0181283	0	negative	80.7828	-1.46445
WBGene00010012	0.0828811	0.0241191	0	positive	46.7682	1.12801
WBGene00017640	0.0829264	-0.0731235	0	negative	15.8772	-1.16099
WBGene00007390	0.0829868	-0.0201831	0	negative	86.686	-1.74959
WBGene00021186	0.0830863	0.0510778	0	positive	13.5438	0.69179
WBGene00007645	0.0832207	-0.0116369	0	negative	136.611	-1.58972
WBGene00012000	0.0832477	0.0248748	0	positive	127.634	3.17487
WBGene00013350	0.0833025	-0.0422794	0	negative	45.2656	-1.9138
WBGene00016968	0.0833052	0.0874167	0	positive	4.65471	0.406899
WBGene00000773	0.0834055	0.0269877	0	positive	104.798	2.82825
WBGene00020433	0.0834423	-0.0391773	0	negative	41.2519	-1.61614
WBGene00013008	0.083445	0.07497	0	positive	9.89105	0.741532
WBGene00022488	0.0835281	0.0318243	0	positive	89.7566	2.85644
WBGene00004157	0.0836006	0.0487237	0	positive	21.8762	1.06589
WBGene00008035	0.0836278	0.0163913	0	positive	184.282	3.02063
WBGene00022666	0.0839135	0.0962318	0	positive	12.9642	1.24757
WBGene00011142	0.0840365	-0.00946118	0	negative	137.493	-1.30085
WBGene00003073	0.0840451	0.0132187	0	positive	212.362	2.80715
WBGene00011253	0.0841003	-0.0243389	0	negative	123.832	-3.01394
WBGene00017373	0.0842489	-0.0305337	0	negative	60.7445	-1.85475
WBGene00016893	0.0842671	0.0634371	0	positive	17.7409	1.12543
WBGene00004771	0.0844152	-0.0556352	0	negative	15.4499	-0.85956
WBGene00006546	0.0844178	-0.038686	0	negative	41.1306	-1.59118
WBGene00012330	0.0845756	0.0326016	0	positive	36.5581	1.19185
WBGene00009588	0.0846078	0.0307103	0	positive	55.046	1.69048
WBGene00019780	0.084739	-0.0506931	0	negative	31.6221	-1.60302
WBGene00001488	0.0847548	-0.0147334	0	negative	194.149	-2.86048
WBGene00000383	0.0848606	0.0129427	0	positive	203.848	2.63834
WBGene00002045	0.0849542	-0.00192172	0	negative	1382.69	-2.65713
WBGene00009918	0.0849595	0.0318957	0	positive	55.5025	1.77029
WBGene00016622	0.0850177	-0.0332796	0	negative	68.0783	-2.26561
WBGene00007850	0.0850486	0.115631	0	positive	6.49346	0.750848
WBGene00017443	0.085222	0.133034	0	positive	4.20533	0.559451
WBGene00013011	0.0853072	-0.0361736	0	negative	68.881	-2.49168
WBGene00017195	0.0853886	-0.0538002	0	negative	31.3494	-1.68661
WBGene00004479	0.0854362	-0.00263999	0	negative	1012.84	-2.67389
WBGene00003089	0.085501	0.178191	0	positive	2.23926	0.399016
WBGene00014177	0.0855367	0.0222552	0	positive	99.5862	2.21631
WBGene00020335	0.0855794	0.143822	0	positive	4.96701	0.714368
WBGene00018443	0.0858049	0.119319	0	positive	7.88269	0.940555
WBGene00000201	0.0858787	-0.021582	0	negative	127.578	-2.7534
WBGene00015392	0.0858923	-0.151434	0	negative	3.9501	-0.598178
WBGene00016816	0.0859948	-0.0249288	0	negative	92.9183	-2.31635
WBGene00016052	0.0860438	-0.0835686	0	negative	3.35155	-0.280084
WBGene00007628	0.0861697	0.0604907	0	positive	23.7254	1.43516
WBGene00008414	0.0862862	0.0243374	0	positive	70.6354	1.71908
WBGene00001156	0.086299	0.024713	0	positive	46.0335	1.13763
WBGene00015809	0.0866033	0.0197354	0	positive	125.02	2.46733
WBGene00013237	0.0866249	0.0202093	0	positive	108.17	2.18604
WBGene00006679	0.0866401	-0.1961	0	negative	2.83896	-0.55672
WBGene00004461	0.0867235	0.0061367	0	positive	348.297	2.13739
WBGene00008117	0.086761	0.00920549	0	positive	202.001	1.85951
WBGene00010196	0.0868863	0.0211649	0	positive	54.965	1.16333
WBGene00012644	0.0870882	0.0284256	0	positive	49.5978	1.40985
WBGene00021876	0.0871438	0.0535773	0	positive	22.93	1.22853
WBGene00005001	0.0872314	0.104221	0	positive	7.39205	0.770408
WBGene00006798	0.0873648	0.0707786	0	positive	15.1679	1.07356
WBGene00012755	0.0874849	-0.163467	0	negative	3.8754	-0.633501
WBGene00017714	0.0876225	0.219728	0	positive	0.345461	0.0759076
WBGene00001582	0.0876352	-0.0106377	0	negative	197.3	-2.09881
WBGene00007875	0.0876729	-0.0196875	0	negative	30.4165	-0.598826
WBGene00010879	0.087693	0.0387938	0	positive	42.5735	1.65159
WBGene00016823	0.0877539	-0.0292918	0	negative	67.8772	-1.98824
WBGene00018638	0.0878682	0.0288151	0	positive	65.056	1.87459
WBGene00004781	0.0880177	0.0221579	0	positive	94.5586	2.09522
WBGene00018890	0.0880352	0.0259694	0	positive	84.7461	2.2008
WBGene00001080	0.0880561	-0.015719	0	negative	77.4232	-1.21702
WBGene00020721	0.0880923	-0.024931	0	negative	105.914	-2.64054
WBGene00007139	0.0881096	0.0322622	0	positive	5.68536	0.183422
WBGene00004405	0.0881132	0.0219731	0	positive	128.915	2.83266
WBGene00013095	0.0881552	-0.0322836	0	negative	93.4509	-3.01693
WBGene00008860	0.0884201	0.0284595	0	positive	41.476	1.18039
WBGene00008603	0.0885283	0.108856	0	positive	7.57951	0.825073
WBGene00018009	0.0886328	-0.0229763	0	negative	82.4017	-1.89329
WBGene00020092	0.0888158	0.0239363	0	positive	127.554	3.05316
WBGene00009679	0.0889658	-0.109656	0	negative	7.69062	-0.843326
WBGene00008683	0.0889987	0.0321048	0	positive	71.0178	2.28001
WBGene00017676	0.0890425	-0.0386389	0	negative	32.5406	-1.25733
WBGene00013541	0.0890683	0.096169	0	positive	10.2811	0.988725
WBGene00006405	0.0891051	0.0207689	0	positive	178.601	3.70934
WBGene00022087	0.089138	-0.0273497	0	negative	107.149	-2.9305
WBGene00016172	0.0892618	-0.0962322	0	negative	8.54741	-0.822536
WBGene00020284	0.0893571	-0.0278843	0	negative	58.1888	-1.62256
WBGene00022262	0.0894811	-0.0687292	0	negative	7.01499	-0.482135
WBGene00010283	0.0895861	-0.0283945	0	negative	76.353	-2.168
WBGene00022445	0.0895942	-0.179471	0	negative	2.2785	-0.408924
WBGene00021334	0.0896136	0.0249163	0	positive	120.76	3.00889
WBGene00013741	0.0896773	-0.198936	0	negative	3.586	-0.713383
WBGene00022515	0.0896819	-0.0318027	0	negative	44.0865	-1.40207
WBGene00006686	0.0898536	0.131466	0	positive	5.56263	0.731295
WBGene00004087	0.0901378	-0.0128388	0	negative	118.677	-1.52368
WBGene00004383	0.0901448	0.0271802	0	positive	74.3028	2.01957
WBGene00017778	0.0901535	0.0197511	0	positive	103.838	2.05091
WBGene00011324	0.090272	-0.0245554	0	negative	104.45	-2.56481
WBGene00006582	0.0904055	-0.104402	0	negative	7.25624	-0.757569
WBGene00017801	0.090418	-0.0232096	0	negative	117.308	-2.72266
WBGene00000797	0.090431	0.0614462	0	positive	21.1045	1.29679
WBGene00010626	0.0904431	0.0281763	0	positive	85.5889	2.41158
WBGene00017124	0.0904448	-0.111276	0	negative	7.18153	-0.799132
WBGene00020693	0.0904696	-0.10054	0	negative	7.50871	-0.754929
WBGene00000379	0.090644	0.00646534	0	positive	346.675	2.24137
WBGene00021795	0.0907496	0.0351507	0	positive	42.0197	1.47702
WBGene00007124	0.0910264	0.0798014	0	positive	15.9505	1.27287
WBGene00022174	0.0910662	0.02852	0	positive	76.3981	2.17887
WBGene00018340	0.0910897	0.0528316	0	positive	18.9775	1.00261
WBGene00000534	0.0912746	0.0163733	0	positive	157.555	2.5797
WBGene00000554	0.0914563	-0.0555311	0	negative	27.811	-1.54438
WBGene00019011	0.0914707	-0.0186723	0	negative	146.75	-2.74016
WBGene00001502	0.0915927	-0.00698207	0	negative	325.527	-2.27285
WBGene00022268	0.0916763	0.0238306	0	positive	75.3756	1.79625
WBGene00044305	0.0916977	0.0352808	0	positive	63.8446	2.25249
WBGene00011058	0.0918098	-0.024272	0	negative	84.5365	-2.05187
WBGene00000150	0.0918698	-0.0651976	0	negative	18.8878	-1.23144
WBGene00011768	0.0919832	-0.0831272	0	negative	10.0867	-0.838477
WBGene00001331	0.0922099	-0.0272218	0	negative	62.5134	-1.70172
WBGene00003580	0.0922723	-0.0935972	0	negative	11.8089	-1.10528
WBGene00011503	0.0926219	0.0257726	0	positive	107.459	2.7695
WBGene00000839	0.0926913	0.0221918	0	positive	96.9517	2.15153
WBGene00044648	0.0932136	-0.0722224	0	negative	17.7699	-1.28339
WBGene00010062	0.0933193	0.155374	0	positive	0.432937	0.067267
WBGene00012117	0.0933642	-0.0090571	0	negative	204.343	-1.85076
WBGene00008800	0.093449	0.0109406	0	positive	194.646	2.12954
WBGene00015915	0.0936309	0.0257371	0	positive	107.802	2.77452
WBGene00015217	0.0936551	-0.0880948	0	negative	11.5387	-1.0165
WBGene00045418	0.0936758	-0.00760637	0	negative	114.252	-0.869043
WBGene00022880	0.0936857	-0.0130882	0	negative	180.237	-2.35897
WBGene00006463	0.0937817	0.0185516	0	positive	126.641	2.34939
WBGene00003160	0.0938178	0.0184347	0	positive	140.924	2.59789
WBGene00017217	0.0939003	0.0154404	0	positive	144.665	2.23369
WBGene00003611	0.0939233	0.0599396	0	positive	21.771	1.30494
WBGene00000224	0.0940336	0.0493281	0	positive	16.6821	0.822896
WBGene00001037	0.0940499	0.00662105	0	positive	364.434	2.41293
WBGene00013136	0.0940955	0.0511929	0	positive	23.8817	1.22257
WBGene00001099	0.0941608	0.0249249	0	positive	44.1986	1.10165
WBGene00011828	0.0942608	-0.0248936	0	negative	75.0511	-1.86829
WBGene00022741	0.0943108	-0.0752886	0	negative	4.68934	-0.353054
WBGene00003979	0.0943142	0.0544625	0	positive	23.9186	1.30267
WBGene00007286	0.0943245	-0.0760999	0	negative	13.1488	-1.00062
WBGene00007859	0.0946586	0.0496712	0	positive	24.1065	1.1974
WBGene00000482	0.0947075	0.0170195	0	positive	46.9949	0.799828
WBGene00010158	0.0947097	0.126877	0	positive	1.65556	0.210053
WBGene00013349	0.0948148	0.0293295	0	positive	55.6824	1.63314
WBGene00009577	0.0948776	0.106857	0	positive	8.37205	0.894613
WBGene00001387	0.0949557	0.0138018	0	positive	11.3689	0.156911
WBGene00004093	0.0949818	-0.0262298	0	negative	79.4359	-2.08359
WBGene00021590	0.0950787	0.0816502	0	positive	8.24317	0.673056
WBGene00044689	0.0951046	0.0152649	0	positive	128.195	1.95688
WBGene00011263	0.0953365	0.118045	0	positive	5.78785	0.683229
WBGene00001398	0.0954	0.00539271	0	positive	229.961	1.24012
WBGene00010309	0.0954049	0.064882	0	positive	19.2952	1.25191
WBGene00004959	0.0954707	0.0980473	0	positive	10.7088	1.04997
WBGene00003950	0.0956286	0.0120551	0	positive	207.326	2.49934
WBGene00018216	0.0958282	0.108621	0	positive	9.26113	1.00596
WBGene00016435	0.095887	0.0220162	0	positive	68.6057	1.51044
WBGene00017258	0.0959188	0.107259	0	positive	6.99027	0.749767
WBGene00008502	0.0960124	0.0212212	0	positive	87.5721	1.85839
WBGene00012807	0.0961421	0.0421924	0	positive	43.8573	1.85044
WBGene00001173	0.0962806	-0.00724283	0	negative	351.886	-2.54865
WBGene00022712	0.0962968	-0.0461308	0	negative	35.1537	-1.62167
WBGene00020436	0.0964719	0.12685	0	positive	6.33956	0.804172
WBGene00010277	0.0964999	0.0591326	0	positive	16.035	0.94819
WBGene00015866	0.0965313	0.0709358	0	positive	21.625	1.53399
WBGene00010481	0.0967005	0.134085	0	positive	5.24321	0.703035
WBGene00011986	0.0967158	-0.00838681	0	negative	275.084	-2.30708
WBGene00021561	0.0967618	-0.0174453	0	negative	116.085	-2.02514
WBGene00017756	0.0969776	-0.0756958	0	negative	7.64198	-0.578466
WBGene00001579	0.0971724	-0.0324268	0	negative	61.7438	-2.00216
WBGene00006824	0.0971794	0.0871383	0	positive	10.267	0.894648
WBGene00011043	0.0971948	0.0294947	0	positive	67.1255	1.97985
WBGene00018934	0.0971986	0.0327504	0	positive	55.4127	1.81479
WBGene00001816	0.097242	0.0511657	0	positive	32.9903	1.68797
WBGene00019770	0.0973067	0.0551313	0	positive	30.8301	1.6997
WBGene00013141	0.0973197	-0.139184	0	negative	6.23316	-0.867553
WBGene00017450	0.0973605	0.062734	0	positive	17.9536	1.1263
WBGene00003731	0.0974163	-0.142057	0	negative	5.32243	-0.75609
WBGene00015619	0.0976594	0.126228	0	positive	5.41422	0.683426
WBGene00022158	0.0977435	-0.101444	0	negative	8.29051	-0.841023
WBGene00011894	0.0978009	0.134532	0	positive	1.75138	0.235617
WBGene00020509	0.0978602	0.0227649	0	positive	53.0885	1.20856
WBGene00016427	0.0978932	-0.090928	0	negative	12.0506	-1.09574
WBGene00009135	0.0980804	-0.101347	0	negative	10.0985	-1.02345
WBGene00001496	0.0981207	0.0252351	0	positive	72.378	1.82647
WBGene00001051	0.0982116	-0.00505007	0	negative	262.881	-1.32757
WBGene00010910	0.0982433	0.0235988	0	positive	92.1204	2.17393
WBGene00007746	0.0982886	-0.124822	0	negative	6.50948	-0.812529
WBGene00022470	0.0983089	0.0378105	0	positive	50.786	1.92024
WBGene00016578	0.0984721	0.103954	0	positive	2.22936	0.23175
WBGene00000781	0.0985957	0.00255773	0	positive	287.788	0.736085
WBGene00014221	0.098635	-0.0429302	0	negative	54.6225	-2.34496
WBGene00001936	0.0987378	-0.0568062	0	negative	13.9532	-0.792628
WBGene00013405	0.0988056	0.0390063	0	positive	56.0504	2.18632
WBGene00012906	0.0988654	0.129226	0	positive	5.64222	0.729122
WBGene00017770	0.0989423	-0.0263374	0	negative	80.6846	-2.12502
WBGene00013167	0.098962	-0.0619642	0	negative	17.12	-1.06083
WBGene00021938	0.0990567	0.027659	0	positive	89.7473	2.48232
WBGene00016888	0.0991963	0.0200037	0	positive	145.788	2.9163
WBGene00018509	0.0992477	0.0220025	0	positive	134.701	2.96376
WBGene00001182	0.0993492	0.0784829	0	positive	10.8321	0.850136
WBGene00017426	0.0994241	-0.143303	0	negative	4.51351	-0.646799
WBGene00009130	0.0994786	0.0798587	0	positive	10.4934	0.837988
WBGene00006780	0.0995691	0.0168496	0	positive	86.7721	1.46208
WBGene00001426	0.099615	0.0181825	0	positive	158.514	2.88218
WBGene00016194	0.0998234	0.0100025	0	positive	233.686	2.33746
WBGene00000004	0.0998257	0.0476722	0	positive	18.3221	0.873457
WBGene00009141	0.0998672	0.0202743	0	positive	104.228	2.11314
WBGene00013443	0.0999316	0.0268386	0	positive	90.1254	2.41884
WBGene00017142	0.0999635	0.0366456	0	positive	45.9156	1.6826
WBGene00004705	0.100007	0.0102096	0	positive	122.478	1.25045
WBGene00007176	0.100149	-0.118883	0	negative	6.34788	-0.754654
WBGene00022830	0.100218	0.0117356	0	positive	277.833	3.26053
WBGene00022580	0.100229	0.0157632	0	positive	138.294	2.17996
WBGene00011330	0.100286	-0.00990604	0	negative	48.5386	-0.480826
WBGene00000983	0.100375	0.0676235	0	positive	3.41848	0.23117
WBGene00018903	0.100394	-0.120233	0	negative	5.93266	-0.713304
WBGene00019120	0.100404	-0.0410063	0	negative	44.8522	-1.83922
WBGene00000145	0.100457	0.0378063	0	positive	44.5661	1.68488
WBGene00009922	0.100609	0.0154729	0	positive	135.741	2.10032
WBGene00011152	0.100628	0.093474	0	positive	11.5047	1.07539
WBGene00000891	0.100634	0.0265711	0	positive	91.0369	2.41895
WBGene00004389	0.100781	0.0212884	0	positive	131.513	2.7997
WBGene00004326	0.100879	0.0148006	0	positive	177.349	2.62487
WBGene00020360	0.10088	-0.144733	0	negative	3.00732	-0.435257
WBGene00021882	0.101186	-0.0161367	0	negative	106.782	-1.72311
WBGene00007501	0.101228	0.106016	0	positive	2.42834	0.257443
WBGene00044469	0.101239	0.0742267	0	positive	13.9694	1.0369
WBGene00001262	0.101266	-0.016779	0	negative	172.793	-2.8993
WBGene00020158	0.101302	-0.0272528	0	negative	66.6049	-1.81517
WBGene00001475	0.101535	0.127953	0	positive	1.50044	0.191986
WBGene00044666	0.101626	0.079414	0	positive	15.9835	1.26931
WBGene00008107	0.101717	0.0204021	0	positive	108.91	2.22199
WBGene00014208	0.101951	0.0202702	0	positive	80.9117	1.6401
WBGene00003934	0.102047	0.00166931	0	positive	520.162	0.86831
WBGene00003068	0.102051	-0.0742866	0	negative	15.3344	-1.13914
WBGene00016496	0.102105	0.0173147	0	positive	173.962	3.0121
WBGene00001309	0.102152	-0.0207668	0	negative	124.521	-2.58591
WBGene00009393	0.102188	-0.0296877	0	negative	22.234	-0.660075
WBGene00009320	0.102334	0.0387474	0	positive	55.4071	2.14688
WBGene00019074	0.102381	-0.0581729	0	negative	25.7629	-1.4987
WBGene00012157	0.102408	-0.0312076	0	negative	62.1719	-1.94024
WBGene00011047	0.10281	0.0353928	0	positive	66.6208	2.35789
WBGene00004410	0.102907	0.00514303	0	positive	243.963	1.25471
WBGene00018601	0.103065	0.120026	0	positive	2.24102	0.268981
WBGene00003164	0.1032	-0.0206384	0	negative	113.355	-2.33946
WBGene00007395	0.103257	-0.0710106	0	negative	14.8176	-1.0522
WBGene00017888	0.103258	0.0571409	0	positive	25.3316	1.44747
WBGene00018782	0.103412	0.00657014	0	positive	242.475	1.59309
WBGene00007591	0.103445	0.053499	0	positive	19.0759	1.02054
WBGene00002199	0.103451	-0.139174	0	negative	3.89351	-0.541876
WBGene00004172	0.103552	0.0437548	0	positive	23.4786	1.0273
WBGene00014230	0.103559	-0.0349637	0	negative	62.115	-2.17177
WBGene00002000	0.103576	0.00479584	0	positive	338.828	1.62497
WBGene00010198	0.103759	0.0233013	0	positive	87.2527	2.0331
WBGene00000071	0.103822	-0.140457	0	negative	4.9976	-0.701947
WBGene00002845	0.103845	0.00371286	0	positive	424.535	1.57624
WBGene00011305	0.103896	-0.103067	0	negative	3.70044	-0.381394
WBGene00003482	0.103982	0.0505989	0	positive	18.5456	0.938388
WBGene00020821	0.104018	-0.0076827	0	negative	259.185	-1.99124
WBGene00013419	0.104075	0.0299551	0	positive	67.4003	2.01898
WBGene00012029	0.104174	0.0436643	0	positive	37.8423	1.65236
WBGene00010905	0.10446	0.0351205	0	positive	49.0907	1.72409
WBGene00016494	0.104555	-0.017211	0	negative	89.1657	-1.53463
WBGene00000913	0.104599	0.00476501	0	positive	702.302	3.34648
WBGene00044696	0.104603	-0.007955	0	negative	112.831	-0.897569
WBGene00004077	0.104623	0.033525	0	positive	33.9795	1.13916
WBGene00010957	0.104827	-0.00329053	0	negative	214.756	-0.706662
WBGene00021948	0.105022	-0.0804241	0	negative	10.0001	-0.804248
WBGene00022538	0.105023	0.0806285	0	positive	6.38912	0.515145
WBGene00000597	0.10505	0.00130951	0	positive	612.97	0.80269
WBGene00001684	0.105151	0.00947905	0	positive	161.553	1.53137
WBGene00001372	0.105158	0.0209204	0	positive	105.503	2.20716
WBGene00000368	0.105285	0.118903	0	positive	8.39643	0.99836
WBGene00016803	0.105398	-0.00912675	0	negative	334.127	-3.04949
WBGene00015130	0.105405	0.0270261	0	positive	59.8934	1.61869
WBGene00004803	0.105541	-0.0530092	0	negative	29.7078	-1.57478
WBGene00010465	0.105589	0.0205777	0	positive	100.656	2.07127
WBGene00015462	0.105593	0.0280873	0	positive	75.5078	2.12081
WBGene00003410	0.105638	0.00814703	0	positive	302.762	2.46661
WBGene00019407	0.105797	0.0845512	0	positive	4.30744	0.364199
WBGene00009162	0.10593	0.11981	0	positive	7.26204	0.870068
WBGene00017625	0.106008	-0.131645	0	negative	5.58454	-0.735179
WBGene00001775	0.106008	-0.0362109	0	negative	40.2513	-1.45753
WBGene00006605	0.106013	0.0219569	0	positive	116.681	2.56195
WBGene00016636	0.106186	-0.0012102	0	negative	1507.94	-1.82491
WBGene00009966	0.106565	0.0229387	0	positive	94.4712	2.16705
WBGene00011939	0.106575	-0.0161175	0	negative	157.579	-2.53978
WBGene00044413	0.106626	0.115337	0	positive	4.47496	0.516127
WBGene00001196	0.106648	-0.00513574	0	negative	152.138	-0.78134
WBGene00013007	0.106869	-0.0531124	0	negative	10.8142	-0.57437
WBGene00011388	0.106905	-0.0569299	0	negative	22.8088	-1.2985
WBGene00010084	0.106953	0.0162811	0	positive	85.6458	1.39441
WBGene00022203	0.107196	-0.00961213	0	negative	162.9	-1.56581
WBGene00017781	0.10726	0.143412	0	positive	4.74123	0.679949
WBGene00016146	0.107322	0.216143	0	positive	0.598047	0.129263
WBGene00012369	0.107326	0.0241455	0	positive	112.666	2.72037
WBGene00016406	0.107334	-0.0620294	0	negative	20.2754	-1.25767
WBGene00010409	0.107355	-0.0203616	0	negative	136.497	-2.77931
WBGene00003519	0.107424	-0.0800748	0	negative	12.7167	-1.01829
WBGene00006384	0.107437	-0.0216488	0	negative	40.3866	-0.87432
WBGene00016997	0.107571	0.0797999	0	positive	7.56573	0.603745
WBGene00011409	0.107586	0.0161782	0	positive	189.878	3.07188
WBGene00021470	0.107622	-0.00454056	0	negative	350.659	-1.59219
WBGene00011105	0.107625	0.0534599	0	positive	18.1363	0.969564
WBGene00011303	0.10767	0.0672921	0	positive	22.963	1.54523
WBGene00002220	0.107827	0.0702377	0	positive	18.6163	1.30757
WBGene00009452	0.107921	-0.0394329	0	negative	54.6286	-2.15417
WBGene00010289	0.107943	-0.187482	0	negative	2.20352	-0.413121
WBGene00004277	0.108002	0.0167803	0	positive	60.6502	1.01773
WBGene00018150	0.108249	-0.0116668	0	negative	115.376	-1.34607
WBGene00000209	0.108774	0.0108091	0	positive	122.786	1.32721
WBGene00000140	0.108784	-0.01959	0	negative	91.5305	-1.79308
WBGene00001998	0.108789	-0.0292462	0	negative	69.306	-2.02694
WBGene00019140	0.108994	0.125262	0	positive	6.99443	0.876135
WBGene00020269	0.109141	-0.0110567	0	negative	289.246	-3.19812
WBGene00001578	0.109429	0.0439298	0	positive	25.3249	1.11252
WBGene00006606	0.109494	-0.0432147	0	negative	37.6529	-1.62716
WBGene00022034	0.109574	0.00883854	0	positive	246.655	2.18007
WBGene00020455	0.109649	0.114625	0	positive	5.16835	0.592421
WBGene00007758	0.109675	0.10513	0	positive	4.0456	0.425315
WBGene00021506	0.110003	-0.0108139	0	negative	213.454	-2.30827
WBGene00017441	0.11007	0.0750863	0	positive	2.01795	0.15152
WBGene00022738	0.11015	-0.0114226	0	negative	191.721	-2.18994
WBGene00018016	0.110163	-0.0187906	0	negative	125.202	-2.35262
WBGene00021170	0.110166	0.0264794	0	positive	97.7358	2.58799
WBGene00001568	0.110177	0.0182786	0	positive	130.45	2.38444
WBGene00045276	0.110487	-0.0822266	0	negative	6.50299	-0.534719
WBGene00003066	0.110535	-0.0388485	0	negative	46.6235	-1.81125
WBGene00019142	0.110633	0.113305	0	positive	6.34995	0.71948
WBGene00012907	0.110652	0.0126108	0	positive	242.18	3.05409
WBGene00022245	0.110666	0.00286952	0	positive	283.949	0.814797
WBGene00007914	0.110893	0.0213829	0	positive	65.3178	1.39668
WBGene00013678	0.110916	0.04447	0	positive	38.3194	1.70406
WBGene00012695	0.111143	0.0286934	0	positive	66.1987	1.89947
WBGene00019472	0.111431	0.154278	0	positive	0.376734	0.0581219
WBGene00008062	0.111824	-0.0499172	0	negative	30.0112	-1.49808
WBGene00009784	0.111847	0.0244367	0	positive	124.73	3.04797
WBGene00013442	0.111949	0.0574305	0	positive	23.5618	1.35317
WBGene00012714	0.111953	0.0131336	0	positive	158.655	2.08372
WBGene00006563	0.112066	-0.0304798	0	negative	39.6975	-1.20997
WBGene00015561	0.112067	0.0565752	0	positive	23.0529	1.30422
WBGene00019645	0.112146	0.0519892	0	positive	27.9907	1.45521
WBGene00003965	0.112364	-0.0400975	0	negative	39.8029	-1.596
WBGene00011275	0.112477	0.0186659	0	positive	65.2631	1.2182
WBGene00012556	0.112505	-0.0441558	0	negative	37.9602	-1.67616
WBGene00021378	0.112611	0.0605656	0	positive	18.6967	1.13237
WBGene00011329	0.112646	-0.0269024	0	negative	107.026	-2.87925
WBGene00019245	0.112649	0.0234313	0	positive	106.719	2.50057
WBGene00013214	0.112668	0.0167672	0	positive	125.025	2.09633
[truncated: 6,825 more rows]

## Sheet: BetaAnalysisBrood
gene	Beta1	Beta2	Beta3	Beta4	Beta5	Beta6	pval_Beta1	pval_Beta2	pval_Beta3	pval_Beta4	pval_Beta5	pval_Beta6
WBGene00000002	-0.314998	-0.246531	-0.629837	-0.128031	0.0928846	0.0226955	3.05e-06	3.66e-07	9.54e-28	0.00650418	0.216158	0.762028
WBGene00000066	-0.466846	-0.337773	-0.594037	-0.1595	0.193341	-0.0734786	7.65e-10	1.69e-09	6.11e-26	0.000572216	0.00336934	0.246815
WBGene00000070	-0.338131	-0.202747	-0.61421	-0.114288	0.196636	0.0971241	5.88e-07	6.09e-05	3.31e-25	0.0185058	0.00805308	0.187271
WBGene00000083	-0.319603	-0.166966	-0.611956	-0.143901	0.255335	-0.0458515	2.37e-06	0.00117477	5.48e-24	0.00356291	0.000602389	0.528455
WBGene00000086	-0.338149	-0.183612	-0.611861	-0.114355	0.227391	0.106615	4.88e-07	0.000310391	1.76e-24	0.0196366	0.00216956	0.144883
WBGene00000115	-0.468354	-0.327706	-0.589004	-0.177881	0.206855	-0.131771	9.3e-09	1.12e-07	1.57e-24	0.000203041	0.00070044	0.0250098
WBGene00000118	-0.444245	-0.212658	-0.579335	-0.152085	0.380266	-0.0741449	7.03e-10	0.000290035	9.27e-21	0.00206865	2.24e-08	0.242293
WBGene00000133	-0.348528	-0.198484	-0.600483	-0.182548	0.298958	-0.23374	2.06e-06	0.000702392	9.37e-23	0.000388759	8.68e-06	0.000314404
WBGene00000140	-0.438433	-0.236218	-0.593493	-0.15341	0.283426	-0.0711358	1.61e-08	9.08e-05	1.2e-22	0.00181821	1.05e-05	0.243069
WBGene00000149	-0.349178	-0.223265	-0.605466	-0.158257	0.23461	-0.0997613	4.18e-07	1.66e-05	1.09e-24	0.00114164	0.00154685	0.16302
WBGene00000175	-0.400569	-0.167963	-0.596817	-0.139251	0.374834	-0.0191849	1.44e-08	0.00309252	1.52e-21	0.00506254	9.07e-08	0.769488
WBGene00000183	0.357927	0.164828	-0.612818	-0.138041	-0.268128	0.0222175	2.48e-06	0.00463025	1.45e-23	0.00531709	6.69e-05	0.728223
WBGene00000207	-0.514093	-0.372011	-0.607528	-0.155159	0.129044	-0.0538238	8.31e-08	1.07e-07	3.69e-26	0.00099806	0.0148453	0.292413
WBGene00000214	-0.513618	-0.264286	-0.602617	-0.134611	0.201252	-0.00146566	1.69e-07	0.000385579	1.38e-23	0.00580942	6.64e-05	0.975587
WBGene00000224	-0.383255	-0.254727	-0.614481	-0.133964	0.172064	0.00515115	4.98e-07	5.55e-06	9.34e-26	0.00514779	0.0111723	0.937219
WBGene00000228	-0.430702	-0.262131	-0.582227	-0.12949	0.302673	0.0232325	1.71e-10	3.78e-07	1.48e-23	0.00603924	4.11e-05	0.743564
WBGene00000240	-0.371898	-0.11362	-0.622176	-0.138921	0.32612	-0.0261053	2.31e-06	0.069148	1.56e-22	0.00585807	3.49e-07	0.663501
WBGene00000266	-0.32747	-0.190195	-0.61798	-0.133577	0.21538	0.00806721	4.24e-06	0.000327821	5.51e-25	0.00632008	0.00317564	0.908658
WBGene00000273	-0.373801	-0.242805	-0.611587	-0.151004	0.195507	-0.0638885	8.57e-07	1.66e-05	3.41e-25	0.00184357	0.00390724	0.327427
WBGene00000378	0.443543	0.261921	-0.590426	-0.150043	-0.270162	0.0529423	3.65e-09	5.58e-06	2.59e-23	0.0019218	4.9e-05	0.402675
WBGene00000381	0.37845	0.209024	-0.605194	-0.14961	-0.267193	0.0625078	2.45e-07	0.000187368	1.16e-23	0.00238867	0.000117312	0.34485
WBGene00000388	0.32232	0.152808	-0.612905	-0.143611	-0.300848	0.0466938	2.55e-06	0.00366174	1.57e-23	0.0038692	5.13e-05	0.514068
WBGene00000473	0.421108	0.247625	-0.598901	-0.142162	-0.240445	0.0327162	4.26e-08	2.01e-05	4.17e-24	0.00320407	0.000251516	0.601504
WBGene00000528	-0.331165	-0.238337	-0.621412	-0.138494	0.145672	-0.0136401	2.02e-06	2.57e-06	1.24e-26	0.00366045	0.0512214	0.8508
WBGene00000597	-0.637781	-0.401835	-0.491188	-0.160976	0.445515	-0.0531781	4.57e-19	4.13e-11	4.01e-17	0.000472813	1.61e-11	0.377658
WBGene00000609	-0.683281	-0.433766	-0.472196	-0.151563	0.451678	-0.0233328	4.23e-26	4.28e-14	4.96e-16	0.000862318	2.09e-12	0.688364
WBGene00000620	-0.392156	-0.30876	-0.605686	-0.194365	0.186196	-0.184162	7.36e-08	1.26e-08	3.83e-26	5.68e-05	0.00708021	0.0062356
WBGene00000671	-0.409293	-0.249465	-0.592853	-0.116214	0.27071	0.0857939	1.07e-09	9.96e-07	3.22e-24	0.014494	0.000235608	0.235716
WBGene00000673	-0.581545	-0.386577	-0.504256	-0.179185	0.412246	-0.106727	1.78e-18	1.71e-12	3.03e-19	7.92e-05	3.35e-09	0.0994139
WBGene00000677	-0.567283	-0.365422	-0.510423	-0.17924	0.407174	-0.121017	9.24e-17	1.17e-10	4.37e-19	0.00010246	1.64e-09	0.0531839
WBGene00000680	-0.434362	-0.248651	-0.590841	-0.157989	0.29329	-0.0896468	5.77e-09	1.59e-05	8.37e-23	0.00127254	7.57e-06	0.148378
WBGene00000713	-0.622128	-0.385663	-0.523207	-0.155697	0.383616	-0.0423221	5.59e-12	4.24e-12	3.4e-19	0.000851121	2.9e-09	0.4786
WBGene00000715	-0.477323	-0.308738	-0.56947	-0.113114	0.304946	0.0720529	6.43e-13	1.22e-09	7.03e-24	0.0133666	3.64e-05	0.311566
WBGene00000716	-0.377621	-0.235966	-0.608649	-0.161501	0.22649	-0.10054	3.82e-07	2.5e-05	1.96e-24	0.00102977	0.000976185	0.128007
WBGene00000723	-0.33854	-0.190753	-0.607511	-0.147475	0.272601	-0.0610082	8.24e-07	0.000245227	4.69e-24	0.00264092	0.000233492	0.394361
WBGene00000732	-0.48559	-0.312998	-0.564648	-0.147936	0.31392	-0.0344869	1.02e-12	2.5e-09	4.36e-23	0.00138393	1.49e-05	0.617288
WBGene00000733	-0.578825	-0.354823	-0.53277	-0.15064	0.365697	-0.0348797	7.81e-16	7.74e-10	3.38e-20	0.00114249	4.62e-08	0.576356
WBGene00000751	-0.653639	-0.393486	-0.53383	-0.159547	0.310668	-0.0606704	4.6e-14	2.03e-08	7.81e-20	0.000666962	1.5e-08	0.234181
WBGene00000752	-0.635202	-0.354661	-0.495001	-0.139463	0.465329	-0.00686545	1.71e-18	2.47e-08	5.52e-16	0.00289836	1.83e-13	0.90386
WBGene00000754	-0.532756	-0.31606	-0.578107	-0.160855	0.260597	-0.0752527	1.03e-09	5.42e-06	2.39e-22	0.00089525	6.13e-06	0.167563
WBGene00000757	-0.560294	-0.322848	-0.564509	-0.163758	0.295052	-0.0836826	8.12e-11	2.76e-06	4.22e-21	0.000723417	2.34e-07	0.118092
WBGene00000768	-0.337797	-0.249936	-0.626931	-0.130488	0.138655	0.0258149	1.88e-06	1.1e-06	4.3e-27	0.00611095	0.0601243	0.718928
WBGene00000779	-0.589426	-0.327275	-0.570281	-0.137321	0.265798	-0.00600044	3.91e-11	3.19e-06	1.06e-21	0.00410597	1.1e-06	0.906751
WBGene00000822	-0.441206	-0.233069	-0.614841	-0.13787	0.184726	-0.00915267	2.46e-06	0.000915227	3.33e-24	0.00520373	0.000622829	0.859198
WBGene00000866	0.335497	0.257995	-0.612898	-0.187732	-0.194513	0.192588	1.42e-06	6.79e-07	6.64e-26	0.000133416	0.00793984	0.00710641
WBGene00000942	-0.408477	-0.28006	-0.599074	-0.143318	0.210346	-0.0283403	7.24e-09	8.49e-08	1.64e-25	0.00223284	0.00360505	0.68406
WBGene00000967	-0.329849	-0.170354	-0.613607	-0.134179	0.25698	0.00258243	2.23e-06	0.00122772	3.53e-24	0.00638181	0.000505284	0.970941
WBGene00000998	-0.40993	-0.202391	-0.576964	-0.150927	0.38564	-0.0840071	8.17e-10	0.000177795	4.65e-21	0.00205319	1.45e-07	0.223265
WBGene00001000	-0.583376	-0.379442	-0.550078	-0.149839	0.286051	-0.0386922	3.33e-14	2.51e-10	1.81e-22	0.00102949	5e-06	0.513119
WBGene00001027	0.352199	0.167344	-0.613381	-0.151717	-0.283262	0.0897645	1.98e-06	0.00339632	2.72e-23	0.00250361	2.93e-05	0.163588
WBGene00001088	0.334741	0.0982169	-0.62213	-0.128843	-0.357399	-0.0574963	1.7e-06	0.0766828	7.98e-23	0.0103334	7.24e-07	0.396604
WBGene00001132	-0.348137	-0.223672	-0.612382	-0.147389	0.221777	-0.0477073	7.22e-07	1.79e-05	3.67e-25	0.00236101	0.00257948	0.502417
WBGene00001155	-0.59471	-0.302574	-0.542482	-0.17326	0.386156	-0.115265	1.29e-09	0.000146315	1.57e-17	0.000502944	9.67e-13	0.0191122
WBGene00001161	0.344537	0.170196	-0.611745	-0.12478	-0.274794	-0.0592627	7.45e-07	0.00134614	6.9e-24	0.0113575	0.000186288	0.400665
WBGene00001169	-0.327029	-0.309557	-0.651611	-0.135763	0.0403957	0.00637453	2.56e-06	2.17e-10	8.94e-31	0.00286046	0.592295	0.931241
WBGene00001193	0.335359	0.123516	-0.618921	-0.14126	-0.330215	0.0416835	3.54e-06	0.0291369	6.17e-23	0.00494964	2.72e-06	0.530575
WBGene00001251	-0.328005	-0.227057	-0.614999	-0.154072	0.204794	-0.0740782	1.44e-06	5.97e-06	8.95e-26	0.00141268	0.00581468	0.313916
WBGene00001263	-0.471694	-0.317642	-0.551006	-0.187965	0.342817	-0.160248	1.48e-12	1.76e-09	4.84e-22	6.83e-05	2.2e-06	0.020163
WBGene00001385	-0.490185	-0.303919	-0.598109	-0.17188	0.217876	-0.111298	1.17e-06	1.61e-08	9.83e-24	0.000460654	0.000131516	0.0413057
WBGene00001386	-0.424541	-0.283443	-0.621545	-0.165852	0.155619	-0.090154	1.65e-05	8.29e-08	1.86e-25	0.000785087	0.00909147	0.117675
WBGene00001394	0.348898	0.156363	-0.609112	-0.14696	-0.322498	0.0725737	1.06e-06	0.00500834	6.97e-23	0.00323739	5.69e-06	0.282226
WBGene00001428	-0.423174	-0.292765	-0.603679	-0.147198	0.191899	-0.0369552	1.41e-08	1.05e-07	1.15e-25	0.0018089	0.00513364	0.575863
WBGene00001478	-0.351628	-0.291927	-0.631402	-0.153022	0.096139	-0.0584114	2.74e-06	5.25e-08	3.74e-28	0.00114671	0.167454	0.388246
WBGene00001481	-0.372763	-0.226268	-0.605357	-0.135768	0.24289	0.00463911	9.18e-08	1.53e-05	1.33e-24	0.00488871	0.000947998	0.947723
WBGene00001483	-0.514422	-0.351922	-0.553491	-0.127352	0.321653	0.0247139	3.13e-15	1.47e-12	3.85e-24	0.00381014	1.23e-05	0.728095
WBGene00001631	-0.457226	-0.306684	-0.584189	-0.135646	0.242133	0.000223404	7.2e-11	5.61e-09	7.56e-25	0.00328562	0.00072132	0.997404
WBGene00001633	-0.40849	-0.284769	-0.607489	-0.157951	0.181795	-0.077433	1.22e-07	6.05e-07	1.32e-25	0.000960243	0.00604032	0.225361
WBGene00001638	0.310087	-0.00910227	-0.6631	-0.135027	-0.502552	0.0227699	5.05e-06	0.875511	4.22e-22	0.00779347	7.44e-13	0.726336
WBGene00001692	-0.410115	-0.236719	-0.599224	-0.168199	0.26263	-0.130731	1.17e-07	7.65e-05	3.61e-23	0.000728197	4.77e-05	0.0342156
WBGene00001694	-0.377643	-0.206419	-0.603604	-0.159593	0.281227	-0.109742	2.5e-07	0.000256567	3.02e-23	0.00134335	4.12e-05	0.0931925
WBGene00001703	-0.350611	-0.187616	-0.606499	-0.151382	0.287358	-0.0827701	7.76e-07	0.000551656	1.44e-23	0.00220299	6.49e-05	0.229622
WBGene00001793	0.500005	0.269246	-0.597457	-0.13093	-0.219944	-0.0174667	2.58e-08	8.66e-05	2.8e-23	0.00708057	7.91e-05	0.741554
WBGene00001794	-0.44665	-0.238377	-0.593308	-0.152796	0.272026	-0.0722904	3.1e-08	0.000147706	1.17e-22	0.00186995	1.12e-05	0.218042
WBGene00001855	0.337644	0.189555	-0.608817	-0.143961	-0.244954	0.0553514	1.32e-06	0.000318192	2.68e-24	0.00323081	0.000867156	0.432748
WBGene00001856	0.425775	0.249518	-0.57308	-0.150165	-0.322476	0.0695047	1.88e-10	1.76e-06	2e-22	0.0016201	1.29e-05	0.323041
WBGene00001863	-0.487577	-0.250821	-0.544699	-0.138906	0.454972	-0.00728353	1.16e-13	5.68e-06	5.66e-19	0.00375694	2.14e-10	0.913045
WBGene00001909	-0.352254	-0.259086	-0.617529	-0.168426	0.160781	-0.125059	3.16e-06	3.25e-06	4.69e-26	0.000531743	0.0183836	0.0588971
WBGene00001911	-0.441243	-0.260338	-0.602328	-0.145724	0.214434	-0.0368502	8.03e-08	2.73e-05	4.75e-24	0.00269607	0.000497576	0.531425
WBGene00001955	-0.328702	-0.144119	-0.614197	-0.143582	0.306164	-0.0576347	3.26e-06	0.00829369	2.5e-23	0.00401661	2.28e-05	0.401207
WBGene00001977	0.324487	0.148937	-0.611495	-0.145847	-0.300698	0.0747623	2.51e-06	0.0051906	2.35e-23	0.00339924	4.64e-05	0.288538
WBGene00001983	0.347805	0.122035	-0.613409	-0.137781	-0.372407	0.0200952	6.27e-07	0.0279923	2.79e-22	0.0059486	2.51e-07	0.767232
WBGene00002010	0.507433	0.262028	-0.55826	-0.134685	-0.378396	0.000407952	2.25e-12	9.51e-06	3.03e-20	0.00496155	1.39e-08	0.994742
WBGene00002023	-0.429006	-0.232231	-0.603259	-0.135405	0.247805	0.00518928	4.93e-08	0.000108425	1.44e-23	0.00569902	0.000110857	0.93222
WBGene00002050	-0.354475	-0.177488	-0.615353	-0.146032	0.251445	-0.0544884	3.37e-06	0.00223362	7.58e-24	0.00334846	0.00018247	0.39566
WBGene00002061	0.341248	0.26307	-0.621218	-0.166436	-0.147609	0.116083	2.88e-06	7.68e-07	9.46e-27	0.000547192	0.0373279	0.0918588
WBGene00002068	0.446488	0.221543	-0.564874	-0.134611	-0.407278	-0.00248729	1.15e-11	3.95e-05	2.35e-20	0.00532708	2.9e-08	0.971126
WBGene00002129	-0.384347	-0.140124	-0.606436	-0.134936	0.381693	0.0100257	6.3e-08	0.0142633	1e-21	0.00695094	5.9e-08	0.878944
WBGene00002219	0.32143	0.158327	-0.614669	-0.138686	-0.268566	0.0255273	4.02e-06	0.00279011	5.56e-24	0.00503408	0.000269979	0.718184
WBGene00002247	-0.319911	-0.275708	-0.63586	-0.141632	0.0793191	-0.02524	2.33e-06	9.89e-09	5.68e-29	0.00221604	0.291111	0.736565
WBGene00002254	-0.430546	-0.233702	-0.612181	-0.160802	0.195913	-0.101238	5.88e-06	0.000848734	1.02e-23	0.00133331	0.000297879	0.0512641
WBGene00002255	-0.4982	-0.276947	-0.569556	-0.178026	0.336025	-0.143575	3.66e-10	1.41e-05	1.28e-20	0.000343547	6.26e-08	0.0139206
WBGene00002256	0.404174	0.182396	-0.596686	-0.150432	-0.335297	0.0859328	7.08e-08	0.00226816	5.69e-22	0.00249461	4.24e-07	0.167793
WBGene00002263	-0.442972	-0.206725	-0.60334	-0.149495	0.267553	-0.0668964	2.7e-07	0.00214164	1.43e-22	0.00269339	3.69e-06	0.220456
WBGene00002264	-0.504328	-0.274895	-0.58411	-0.150724	0.269311	-0.0504581	4.05e-09	2.62e-05	3.93e-22	0.00198859	5.04e-06	0.365266
WBGene00002265	-0.472645	-0.257442	-0.58349	-0.153392	0.291836	-0.06921	2.48e-09	3.57e-05	3.67e-22	0.00166089	2.97e-06	0.240553
WBGene00002267	-0.383296	-0.248024	-0.619909	-0.143553	0.153151	-0.0313599	4.55e-06	5.59e-05	1.47e-25	0.00318189	0.0129585	0.597688
WBGene00002268	-0.553646	-0.303803	-0.572804	-0.163663	0.277856	-0.0868705	7.95e-09	2.56e-05	4.27e-21	0.000850293	2.85e-07	0.087537
WBGene00002280	-0.416547	-0.260852	-0.573275	-0.18679	0.330078	-0.197739	1.99e-09	2.37e-06	3.87e-22	0.00015292	2.46e-06	0.00309046
WBGene00002497	-0.412349	-0.283287	-0.594945	-0.139313	0.237123	-0.00178541	8.91e-10	1.44e-08	1.76e-25	0.00274392	0.00150194	0.980438
WBGene00002915	-0.376333	-0.30205	-0.603883	-0.182766	0.160199	-0.153337	1.9e-08	7.55e-10	4.46e-27	8.9e-05	0.0316632	0.0377244
WBGene00002978	-0.505044	-0.282487	-0.574247	-0.149324	0.312606	-0.0439573	6.39e-11	3.95e-06	1.16e-21	0.00205049	7.78e-07	0.459475
WBGene00003055	-0.31643	-0.155486	-0.616362	-0.140049	0.269895	-0.0279462	5.15e-06	0.00317397	5.03e-24	0.00474049	0.000278189	0.694586
WBGene00003071	-0.341785	-0.236175	-0.614932	-0.139841	0.171026	-0.0226721	7.59e-07	3.09e-06	4.36e-26	0.00334595	0.0225139	0.754835
WBGene00003130	0.330036	0.167124	-0.612459	-0.131635	-0.262788	-0.0260335	1.21e-06	0.00121396	5.17e-24	0.00751448	0.00046311	0.719458
WBGene00003148	0.417652	0.248855	-0.5793	-0.16697	-0.310384	0.133406	3.46e-09	6.95e-06	1.56e-22	0.000591727	9.58e-06	0.0458389
WBGene00003175	-0.399793	-0.224006	-0.596941	-0.138772	0.292525	-0.0060822	1.22e-08	3.05e-05	1.96e-23	0.00427233	5.35e-05	0.929918
WBGene00003184	0.366993	0.276995	-0.609812	-0.178444	-0.176553	0.159028	7.3e-07	4.52e-07	4.62e-26	0.000222798	0.00982648	0.0166257
WBGene00003185	0.370327	0.188873	-0.599909	-0.145368	-0.324972	0.0472043	9.04e-08	0.000434524	6.19e-23	0.00315235	8.52e-06	0.498198
WBGene00003216	0.37355	0.215739	-0.600832	-0.137977	-0.266646	0.0167537	8.29e-08	4.31e-05	5.21e-24	0.00432005	0.000268586	0.811458
WBGene00003235	-0.402658	-0.229759	-0.616478	-0.150738	0.181922	-0.0615579	4.43e-06	0.00045181	1.78e-24	0.00232698	0.00174068	0.269813
WBGene00003242	-0.376207	-0.235583	-0.586744	-0.175258	0.292816	-0.169556	2.09e-08	6.28e-06	3.48e-23	0.000351552	6.24e-05	0.0174476
WBGene00003243	-0.333256	-0.26021	-0.624609	-0.144201	0.119494	-0.0309788	1.11e-06	1.31e-07	1.55e-27	0.00216275	0.114971	0.676099
WBGene00003369	-0.646889	-0.363243	-0.517052	-0.117376	0.38578	0.0482026	3.1e-17	2.6e-08	3.29e-18	0.0115441	1.41e-10	0.381882
WBGene00003370	-0.606738	-0.318061	-0.571854	-0.13144	0.270869	0.0142028	1.19e-10	2.3e-05	3.19e-21	0.00661236	1.82e-07	0.769652
WBGene00003371	-0.641573	-0.390772	-0.523199	-0.15142	0.350452	-0.0406912	9.88e-16	7.99e-09	1.94e-19	0.00107569	2.92e-09	0.455693
WBGene00003407	-0.357269	-0.273956	-0.614461	-0.154264	0.149331	-0.0666863	1.52e-07	2.9e-08	4.2e-27	0.000975045	0.0483543	0.366508
WBGene00003482	-0.353436	-0.264941	-0.612175	-0.152933	0.160777	-0.0710588	1.75e-07	7.56e-08	9.91e-27	0.00112134	0.0323212	0.337541
WBGene00003485	-0.366639	-0.280957	-0.621441	-0.154187	0.142215	-0.0608007	5.24e-07	1.11e-07	4.36e-27	0.0011493	0.0453348	0.377564
WBGene00003495	-0.551566	-0.324266	-0.553286	-0.140039	0.329969	-0.0103588	1.57e-13	5.31e-08	4e-21	0.00290259	3.44e-07	0.86441
WBGene00003497	-0.424257	-0.288424	-0.571816	-0.180065	0.292059	-0.150684	1.83e-10	1.95e-08	1.87e-23	0.000148121	7.12e-05	0.0342178
WBGene00003515	-0.339331	-0.245743	-0.619767	-0.155529	0.162259	-0.0798176	3.08e-06	3.84e-06	2.88e-26	0.00125287	0.0232032	0.249563
WBGene00003567	-0.326088	-0.184467	-0.609211	-0.147318	0.24149	-0.0686504	1.47e-06	0.000312285	3.02e-24	0.00266962	0.00130707	0.346264
WBGene00003589	-0.374163	-0.291109	-0.621637	-0.133121	0.141454	0.0183565	5.22e-08	4.07e-09	6.46e-28	0.00402134	0.0604948	0.802647
WBGene00003658	-0.30901	-0.126244	-0.617477	-0.138573	0.32252	-0.031605	5.24e-06	0.0159792	2.25e-23	0.00550097	1.05e-05	0.657234
WBGene00003674	-0.362154	-0.187571	-0.59927	-0.145365	0.339161	-0.0546818	1.02e-07	0.000362411	5.02e-23	0.00307718	3.28e-06	0.439491
WBGene00003687	-0.333115	-0.196192	-0.607953	-0.154341	0.254911	-0.0999458	1.54e-06	0.000180911	2.94e-24	0.00168252	0.000540435	0.16023
WBGene00003692	-0.361882	-0.199584	-0.606171	-0.131832	0.283083	0.0247224	1.39e-07	0.000127971	5.29e-24	0.00689672	0.000138224	0.730122
WBGene00003738	-0.366417	-0.290211	-0.620834	-0.135592	0.124216	-0.00644667	1.27e-07	5.34e-09	4.94e-28	0.00319397	0.0965016	0.929307
WBGene00003772	-0.371765	-0.264796	-0.601992	-0.154692	0.21085	-0.08628	2.93e-08	8.49e-08	7.95e-26	0.00100043	0.00444823	0.239944
WBGene00003828	-0.499161	-0.314534	-0.592726	-0.1202	0.208299	0.0482247	7.81e-10	2.73e-07	1.56e-24	0.0108435	0.000736553	0.414409
WBGene00003893	-0.661963	-0.431504	-0.482154	-0.181463	0.417998	-0.101628	1.51e-17	3.29e-09	4.63e-17	7.26e-05	1.28e-11	0.0715422
WBGene00003922	0.443754	0.253042	-0.57481	-0.136285	-0.322201	0.00677098	1.01e-10	2.36e-06	2.04e-22	0.00416738	8.18e-06	0.921217
WBGene00003929	-0.432235	-0.2734	-0.573079	-0.153413	0.300503	-0.0621901	6.68e-11	8.24e-08	3.43e-23	0.00110587	5.16e-05	0.384518
WBGene00003934	-0.514922	-0.316931	-0.60953	-0.146044	0.144365	-0.0357998	1.23e-06	6.01e-05	9.61e-25	0.00264471	0.00226394	0.430056
WBGene00003936	-0.373033	-0.256545	-0.595528	-0.175427	0.240355	-0.155187	5.7e-08	8.12e-07	1.24e-24	0.000288478	0.00104782	0.0286669
WBGene00003947	0.334977	0.167789	-0.610736	-0.139071	-0.273926	0.0267239	1.45e-06	0.0015431	7.77e-24	0.00477235	0.000202758	0.704343
WBGene00003992	0.401491	0.248843	-0.603119	-0.158295	-0.22482	0.0906791	2.17e-07	2.09e-05	2.85e-24	0.00117914	0.000602682	0.149227
WBGene00003994	0.398422	0.247192	-0.595212	-0.159455	-0.260563	0.0955041	2.88e-08	6.05e-06	6.79e-24	0.00100833	0.000211022	0.155829
WBGene00003995	-0.487436	-0.299051	-0.593594	-0.151491	0.208796	-0.0597306	2.69e-08	6.75e-06	5.16e-24	0.00160755	0.000269293	0.275171
WBGene00004014	0.535885	0.312101	-0.520196	-0.13506	-0.449453	0.00461685	1.51e-16	8.83e-09	6.93e-19	0.00344034	3.81e-10	0.944908
WBGene00004038	-0.316996	-0.144188	-0.613964	-0.138338	0.288055	-0.0245756	2.62e-06	0.00537475	1.52e-23	0.00533184	9.18e-05	0.733102
WBGene00004059	-0.352309	-0.217916	-0.610093	-0.152044	0.234326	-0.0717355	8e-07	4.53e-05	1.09e-24	0.00184642	0.00117418	0.302576
WBGene00004078	0.400836	0.284411	-0.604239	-0.161275	-0.190646	0.0916267	7.51e-08	2.48e-07	1.2e-25	0.000698784	0.00545609	0.166669
WBGene00004086	0.353854	0.16546	-0.604969	-0.138748	-0.32823	0.020708	2.38e-07	0.00186173	6.16e-23	0.00500498	8.73e-06	0.769228
WBGene00004094	0.342386	0.127434	-0.614916	-0.147274	-0.352522	0.0878506	2.03e-06	0.0257645	1.84e-22	0.00351412	4.92e-07	0.184094
WBGene00004130	-0.363396	-0.239488	-0.606224	-0.141036	0.211247	-0.0240782	1.17e-07	2.46e-06	2.51e-25	0.00308684	0.00469408	0.739211
WBGene00004143	0.424886	0.256612	-0.606496	-0.165147	-0.198358	0.116661	1.67e-06	0.000144046	4.46e-24	0.000868148	0.000449877	0.0318084
WBGene00004201	0.36637	0.152445	-0.605743	-0.14123	-0.342127	0.0423022	2.91e-07	0.00683148	2.13e-22	0.0045313	1.25e-06	0.524722
WBGene00004241	0.385951	0.256884	-0.599767	-0.155192	-0.235928	0.0739999	2.3e-08	6.6e-07	6.29e-25	0.00116793	0.00137108	0.296212
WBGene00004243	0.44611	0.259902	-0.57775	-0.125192	-0.321693	-0.0469417	3.53e-11	7.11e-07	8.85e-23	0.00847057	1.31e-05	0.50334
WBGene00004302	0.427575	0.193183	-0.594276	-0.12321	-0.331548	-0.0580008	5.72e-09	0.00089513	3.38e-22	0.0121853	9.26e-07	0.361159
WBGene00004352	0.398148	0.21364	-0.583141	-0.161327	-0.348939	0.121022	6.6e-09	8.99e-05	6.7e-22	0.00105083	1.3e-06	0.0765867
WBGene00004423	-0.445811	-0.364911	-0.632827	-0.1566	0.0586339	-0.0583557	1.77e-05	7.2e-07	8.26e-28	0.00100812	0.241749	0.230593
WBGene00004438	-0.38365	-0.273451	-0.633277	-0.139317	0.123533	-0.000866395	4.41e-06	0.000749153	1.67e-26	0.00446615	0.0451761	0.988403
WBGene00004467	0.33631	0.236625	-0.62106	-0.143231	-0.151398	0.0378079	5.23e-06	1.11e-05	2.85e-26	0.00287597	0.0320308	0.580081
WBGene00004502	0.47102	0.29132	-0.59033	-0.134671	-0.228178	0.00188609	2.4e-09	1.05e-06	3.86e-24	0.0044378	0.000350626	0.975311
WBGene00004823	0.413127	0.239216	-0.595515	-0.136571	-0.263299	0.00634619	1.48e-08	1.64e-05	1e-23	0.00456308	0.000155005	0.923901
WBGene00004949	-0.340447	-0.245153	-0.622094	-0.111654	0.136862	0.0986353	4.31e-07	6.04e-07	5.59e-27	0.0183257	0.0664635	0.184938
WBGene00004995	-0.383006	-0.226666	-0.620816	-0.150121	0.175585	-0.0512462	2.95e-06	0.000160385	6.77e-25	0.00240537	0.00574027	0.402392
WBGene00005552	-0.407105	-0.22318	-0.579592	-0.167783	0.370522	-0.142236	3.56e-09	5.15e-05	1.31e-21	0.000684774	2.1e-07	0.035984
WBGene00005712	-0.339993	-0.175017	-0.608529	-0.128097	0.263727	0.0291749	4.88e-07	0.000664974	6.45e-24	0.00890572	0.000429085	0.687191
WBGene00006061	0.359251	0.148831	-0.60767	-0.142989	-0.340882	0.0516305	4.61e-07	0.00805092	1.71e-22	0.00415361	1.49e-06	0.439435
WBGene00006365	-0.318054	-0.272076	-0.636093	-0.146856	0.10461	-0.0383544	3.65e-06	2.65e-08	1.09e-28	0.00167632	0.165884	0.60719
WBGene00006367	-0.352809	-0.237915	-0.61459	-0.114142	0.171305	0.0831965	1.87e-07	1.82e-06	3.87e-26	0.0163622	0.0228866	0.259252
WBGene00006407	-0.326687	-0.161311	-0.612254	-0.133602	0.267764	0.00784427	1.54e-06	0.00182489	6.8e-24	0.00671085	0.00035947	0.913585
WBGene00006408	-0.489494	-0.317677	-0.584383	-0.181618	0.256119	-0.138398	2e-09	9.88e-06	4.08e-23	0.000197713	2.69e-05	0.0175761
WBGene00006529	0.345232	0.145886	-0.606406	-0.153028	-0.354881	0.119621	7.71e-07	0.00875047	2.87e-22	0.00237436	7.3e-07	0.0777311
WBGene00006575	-0.314337	-0.22226	-0.626161	-0.127314	0.134812	0.037822	5.49e-06	9.89e-06	1.11e-26	0.00794388	0.0739141	0.606615
WBGene00006584	-0.409481	-0.27763	-0.593707	-0.153037	0.244077	-0.061753	3.37e-09	7.92e-08	5.64e-25	0.00115556	0.000855555	0.38189
WBGene00006587	-0.553699	-0.304265	-0.551619	-0.147594	0.357043	-0.036433	4.56e-13	1.12e-06	5.28e-20	0.00206773	1.18e-08	0.530694
WBGene00006603	-0.372669	-0.256185	-0.604921	-0.141457	0.2058	-0.0193304	3.51e-08	2.77e-07	9.8e-26	0.00269598	0.00610839	0.791944
WBGene00006634	-0.366017	-0.176927	-0.601946	-0.147658	0.330824	-0.068596	2.08e-07	0.00128231	1.01e-22	0.0028814	4.01e-06	0.314524
WBGene00006672	-0.438483	-0.27074	-0.585795	-0.133824	0.274394	0.0103466	3.29e-10	3.5e-07	8.12e-24	0.00465618	0.000141115	0.880592
WBGene00006723	0.328044	0.174237	-0.612043	-0.132052	-0.245081	-0.016429	1.22e-06	0.00064646	3.07e-24	0.00708098	0.00108733	0.821868
WBGene00006733	0.363278	0.198835	-0.599963	-0.139459	-0.286445	0.0261587	9.55e-08	0.000131708	1.38e-23	0.004142	0.000112738	0.714171
WBGene00006754	-0.469167	-0.263515	-0.576014	-0.149188	0.317502	-0.0520591	2.15e-10	5.81e-06	4.77e-22	0.00196977	1.98e-06	0.408033
WBGene00006759	-0.397528	-0.245331	-0.593778	-0.14197	0.251413	-0.0328095	1.13e-08	3.07e-06	3.28e-24	0.00289145	0.000558138	0.638368
WBGene00006764	-0.704651	-0.375512	-0.546303	-0.141228	0.291134	-0.0172424	3.81e-13	2.58e-06	1.39e-19	0.0030754	2e-09	0.700038
WBGene00006780	-0.440521	-0.333261	-0.594345	-0.144574	0.198231	-0.0217786	4.91e-11	8.47e-12	2.86e-27	0.00119911	0.00814603	0.765292
WBGene00006787	-0.474196	-0.342187	-0.560455	-0.177039	0.28564	-0.12013	6.2e-13	8.09e-12	2.07e-24	9.08e-05	0.000104772	0.0922144
WBGene00006789	-0.532225	-0.332125	-0.544506	-0.139855	0.345695	-0.0119623	1.27e-14	1.26e-09	1.39e-21	0.00227902	7.68e-07	0.85587
WBGene00006794	-0.454745	-0.294626	-0.602012	-0.164912	0.194578	-0.09412	8.09e-08	3.97e-06	1.88e-24	0.000700126	0.00113734	0.101498
WBGene00006815	-0.343206	-0.226505	-0.615711	-0.115743	0.180447	0.0768294	3.99e-07	5.71e-06	5.94e-26	0.015526	0.0162991	0.297851
WBGene00006819	-0.645529	-0.4179	-0.555651	-0.163631	0.238797	-0.0693834	2.64e-12	5.69e-09	2.4e-22	0.000437261	5.23e-06	0.161602
WBGene00006820	-0.385199	-0.249119	-0.603702	-0.165682	0.213585	-0.126838	7.15e-07	2.17e-05	1.46e-24	0.000705695	0.00106169	0.0435615
WBGene00006836	-0.343876	-0.26638	-0.625292	-0.125535	0.128969	0.0362474	4.89e-07	6.04e-08	8.95e-28	0.00708873	0.0872415	0.624418
WBGene00006863	-0.396662	-0.240531	-0.603505	-0.124969	0.236391	0.0481436	2.45e-08	6.85e-06	1.33e-24	0.00933187	0.000999602	0.485323
WBGene00006876	-0.317277	-0.239005	-0.619327	-0.163099	0.150646	-0.114911	3.63e-06	1.87e-06	1.65e-26	0.000707765	0.0450594	0.118582
WBGene00006914	-0.46891	-0.313663	-0.57127	-0.166523	0.27097	-0.105271	7.5e-11	1.3e-08	1.32e-23	0.000372074	8.08e-05	0.108925
WBGene00006999	-0.492914	-0.308414	-0.559695	-0.146537	0.32475	-0.0340145	7.49e-13	9.22e-09	2.15e-22	0.00163059	5.08e-06	0.613302
WBGene00007000	0.41729	0.216774	-0.589411	-0.137713	-0.314329	0.0148522	5.97e-09	0.000107651	1.55e-22	0.00459708	6.95e-06	0.822349
WBGene00007001	0.410947	0.203843	-0.593577	-0.136108	-0.312081	0.00826408	1.57e-08	0.000330022	1.43e-22	0.00532562	6.27e-06	0.899282
WBGene00007109	0.401673	0.221876	-0.599182	-0.138821	-0.281555	0.00845699	1.72e-08	4.77e-05	2.08e-23	0.00446426	6.83e-05	0.899882
WBGene00007168	0.399544	0.247399	-0.589093	-0.182892	-0.296152	0.185476	2.6e-08	1.09e-05	7.97e-23	0.000245514	1.55e-05	0.00471529
WBGene00007175	-0.333403	-0.153057	-0.615061	-0.110572	0.271584	0.168236	8.12e-07	0.00344301	7.43e-24	0.0271686	0.000191877	0.0193719
WBGene00007193	-0.354797	-0.118873	-0.609284	-0.134503	0.389681	0.0075278	1.18e-07	0.0284001	1.03e-21	0.00717809	1.04e-07	0.913758
WBGene00007277	0.345258	0.220426	-0.611782	-0.136442	-0.196235	0.0123761	7.13e-07	1.9e-05	2.32e-25	0.00453386	0.00809695	0.862796
WBGene00007282	-0.321215	-0.120948	-0.620531	-0.130499	0.308772	0.0390182	4.94e-06	0.0262541	1.9e-23	0.00906615	2.18e-05	0.573094
WBGene00007290	0.370161	0.267477	-0.618859	-0.163558	-0.16169	0.0960195	1.08e-06	1.72e-06	4.86e-26	0.000758562	0.0169004	0.142741
WBGene00007331	-0.399205	-0.228696	-0.609817	-0.14155	0.209119	-0.0312085	9.93e-07	0.000187605	1.87e-24	0.00372617	0.000834795	0.602363
WBGene00007352	0.560452	0.355132	-0.572077	-0.14867	-0.244025	0.0365698	1.94e-11	3.85e-08	3.39e-23	0.00152224	3.42e-05	0.512793
WBGene00007428	0.414267	0.298408	-0.625025	-0.141335	-0.148707	-0.00247701	2.35e-07	1.03e-08	2.36e-26	0.0036248	0.0228601	0.96867
WBGene00007463	-0.534835	-0.247936	-0.571113	-0.130936	0.346306	0.0107073	3.11e-11	0.000168922	1.63e-20	0.00699015	7.8e-09	0.847123
WBGene00007574	-0.375754	-0.213934	-0.606568	-0.137559	0.248091	-0.00757362	2.3e-07	9.51e-05	3.5e-24	0.00473258	0.000448387	0.910956
WBGene00007591	-0.340784	-0.251177	-0.620055	-0.162783	0.160323	-0.105088	3.51e-06	3.06e-06	2.83e-26	0.000774779	0.0232002	0.125336
WBGene00007686	0.453218	0.244113	-0.579437	-0.153897	-0.330091	0.0717664	6.82e-10	2.73e-05	9.83e-22	0.00160059	9.93e-07	0.259194
WBGene00007709	0.386767	0.24487	-0.591338	-0.164507	-0.263974	0.124901	3.11e-08	4.42e-06	7.32e-24	0.000671214	0.000248428	0.0710826
WBGene00007718	0.374951	0.210358	-0.593194	-0.149409	-0.300858	0.0637591	2.55e-08	5.06e-05	3.65e-23	0.00213712	5.23e-05	0.373058
WBGene00007780	0.355206	0.199127	-0.603986	-0.150012	-0.274715	0.0718149	3.86e-07	0.000188705	8.95e-24	0.00223122	0.000162251	0.304068
WBGene00007922	0.369621	0.174299	-0.608577	-0.135211	-0.300257	-0.00998451	2.04e-07	0.00150859	3.55e-23	0.00637227	2.69e-05	0.883105
WBGene00007927	0.473824	0.164784	-0.575667	-0.13145	-0.50092	-0.0220923	9e-12	0.00737517	2.77e-18	0.00815651	1.31e-13	0.71611
WBGene00007934	-0.32243	-0.275591	-0.63938	-0.130819	0.090506	0.0315452	2.36e-06	1.41e-08	4.92e-29	0.00487874	0.228095	0.673864
WBGene00007941	0.333349	0.107699	-0.616694	-0.135633	-0.381583	0.00456965	9.46e-07	0.0470122	2.39e-22	0.00683043	1.71e-07	0.947618
WBGene00007964	-0.37061	-0.17365	-0.601124	-0.115168	0.310714	0.104115	3.74e-08	0.000973793	5.63e-23	0.0193488	2.85e-05	0.143627
WBGene00008147	0.360371	0.176585	-0.604957	-0.140727	-0.304348	0.0329887	3.26e-07	0.00117552	3.54e-23	0.00431854	2.48e-05	0.630958
WBGene00008191	-0.363044	-0.13342	-0.605618	-0.144127	0.395692	-0.0700999	1.81e-07	0.0176753	1.22e-21	0.00402365	3.05e-08	0.295752
WBGene00008205	-0.308555	-0.153547	-0.614331	-0.145984	0.266555	-0.0667053	5.45e-06	0.00300455	7.15e-24	0.00329711	0.000332707	0.357316
WBGene00008218	0.401059	0.285568	-0.593318	-0.165031	-0.225821	0.0999728	3.37e-09	1.6e-08	2.14e-25	0.000440193	0.00243447	0.165298
WBGene00008219	0.405377	0.25827	-0.589886	-0.182865	-0.276033	0.175361	1.92e-08	3.95e-06	3.36e-23	0.000222763	5.46e-05	0.00757228
WBGene00008224	0.542847	0.260878	-0.555895	-0.130566	-0.38693	-0.0133086	9.53e-13	4.11e-05	1.82e-19	0.00677424	6.37e-10	0.817133
WBGene00008390	-0.448751	-0.303848	-0.590166	-0.141178	0.229571	-0.0162969	3.48e-10	1.24e-08	4.36e-25	0.00239146	0.00117115	0.810373
WBGene00008393	-0.426045	-0.209861	-0.579713	-0.138218	0.383637	-0.00497165	3.18e-10	0.000113958	2.86e-21	0.00463046	1.41e-07	0.942163
WBGene00008410	0.389385	0.198823	-0.593521	-0.148729	-0.335012	0.0620784	2.01e-08	0.000256198	2.03e-22	0.00251289	3.72e-06	0.365059
WBGene00008435	-0.39151	-0.23325	-0.594924	-0.144804	0.275707	-0.0435513	2.07e-08	1.1e-05	8.07e-24	0.00262667	0.000146897	0.531537
WBGene00008580	0.327121	0.143054	-0.611972	-0.152096	-0.341979	0.109925	2.7e-06	0.00877071	7.28e-23	0.00251966	2.45e-06	0.112501
WBGene00008654	-0.367133	-0.211362	-0.599569	-0.140127	0.264916	-0.0342848	8.81e-08	4.86e-05	5.89e-24	0.00373146	0.000359597	0.629872
WBGene00008666	-0.366616	-0.231498	-0.608596	-0.115743	0.210445	0.0885961	6.16e-08	4.6e-06	2.64e-25	0.0156697	0.00505571	0.226392
WBGene00008669	-0.311918	-0.195712	-0.618104	-0.14171	0.22093	-0.0406182	5.16e-06	0.000109377	2.4e-25	0.0036169	0.00293433	0.579884
WBGene00008707	-0.560761	-0.295266	-0.521504	-0.177074	0.48252	-0.13168	4.66e-15	3.27e-06	2.28e-16	0.000331291	6.66e-14	0.0234886
WBGene00008856	0.466207	0.263338	-0.583308	-0.145759	-0.278422	0.0432244	2e-09	1.28e-05	1.11e-22	0.00246316	1.38e-05	0.475987
WBGene00008857	0.322655	0.120248	-0.614718	-0.13927	-0.339203	0.03785	1.73e-06	0.0234518	9.56e-23	0.00536302	3.34e-06	0.592778
WBGene00009092	0.378684	0.156242	-0.608847	-0.140474	-0.315025	0.0375228	5.5e-07	0.00836634	9.68e-23	0.00476756	2.26e-06	0.549836
WBGene00009138	0.372412	0.163407	-0.601778	-0.132379	-0.335364	-0.0094548	8.26e-08	0.00274211	1.56e-22	0.00728929	3.72e-06	0.890281
WBGene00009192	-0.466353	-0.253166	-0.607841	-0.132232	0.191649	0.00644316	5.11e-07	0.000293791	3.08e-24	0.00660621	0.000445332	0.901571
WBGene00009246	0.478892	0.229075	-0.558925	-0.152287	-0.426661	0.0798893	1.14e-11	0.00011768	2.92e-19	0.00184273	2.91e-10	0.200058
WBGene00009259	-0.357183	-0.170626	-0.605367	-0.152153	0.310669	-0.0993857	7.69e-07	0.00247441	7.16e-23	0.00228803	8.95e-06	0.134594
WBGene00009342	-0.366985	-0.295419	-0.622927	-0.134387	0.116929	0.000925955	1.08e-07	2.2e-09	2.26e-28	0.00333196	0.118243	0.98988
WBGene00009531	-0.441723	-0.211034	-0.604722	-0.126702	0.254912	0.0430099	9.15e-08	0.000964357	4.26e-23	0.0101974	2.77e-05	0.456091
WBGene00009542	0.38429	0.256324	-0.630251	-0.154565	-0.158856	0.0553242	1.17e-05	1.41e-06	1.92e-25	0.00198198	0.00794063	0.337231
WBGene00009559	0.557827	0.364228	-0.526237	-0.170663	-0.359329	0.101418	1.88e-15	1.19e-10	1.13e-20	0.00018779	1.02e-07	0.109201
WBGene00009645	-0.353406	-0.144205	-0.60897	-0.13341	0.340692	0.016088	3.31e-07	0.00796636	1.16e-22	0.0073019	3.01e-06	0.816055
WBGene00009701	0.331056	0.220868	-0.606898	-0.177569	-0.238041	0.18754	2.17e-06	3.27e-05	1.5e-24	0.000360452	0.00102936	0.00767625
WBGene00009878	0.35067	0.25507	-0.602863	-0.181062	-0.225602	0.165959	2.11e-07	4.99e-07	2.59e-25	0.000192612	0.00205721	0.0225477
WBGene00009982	-0.330715	-0.232244	-0.612738	-0.168445	0.208383	-0.140546	2.2e-06	7.77e-06	1.82e-25	0.000563641	0.00464103	0.0495227
WBGene00010012	-0.399137	-0.234786	-0.589154	-0.135854	0.291169	0.00213931	2.64e-09	4.64e-06	1.57e-23	0.00447681	8.83e-05	0.976245
WBGene00010055	-0.553316	-0.319197	-0.558459	-0.163045	0.310346	-0.085555	1.11e-11	1.08e-06	7.72e-21	0.000699755	1.58e-07	0.123103
WBGene00010064	-0.425969	-0.2685	-0.6001	-0.138998	0.222616	-0.0109395	1.48e-08	1.9e-06	1.22e-24	0.00363955	0.00100371	0.86605
WBGene00010094	0.422437	0.207969	-0.59629	-0.142191	-0.296602	0.0369337	3.97e-08	0.000524317	1.13e-22	0.00376662	5.22e-06	0.547829
WBGene00010135	-0.454012	-0.380568	-0.602006	-0.217402	0.170616	-0.20643	2.12e-09	1.48e-13	3.58e-27	4.21e-06	0.00912866	0.00125473
WBGene00010260	0.387726	0.123282	-0.62088	-0.133951	-0.298064	-0.00900089	2.79e-06	0.058259	8.64e-23	0.00759533	9.45e-07	0.874689
WBGene00010303	0.50153	0.243739	-0.539261	-0.149948	-0.485717	0.0614563	8.45e-14	3.21e-05	9.76e-18	0.00200806	2.66e-12	0.329646
WBGene00010304	0.425956	0.169249	-0.588401	-0.1288	-0.40394	-0.0303654	1.17e-09	0.00326138	9.09e-21	0.00908516	7.78e-09	0.640194
WBGene00010353	0.457916	0.294071	-0.553036	-0.179542	-0.354083	0.143937	3.58e-12	2.09e-08	1.3e-21	0.000158433	1.25e-06	0.0395216
WBGene00010363	0.34612	0.166369	-0.609614	-0.135745	-0.301546	0.00672549	8.03e-07	0.00197185	1.79e-23	0.00595932	3.52e-05	0.923067
WBGene00010496	0.371364	0.190402	-0.604779	-0.137781	-0.294034	0.0063224	1.34e-07	0.00043387	2.26e-23	0.00511727	4.76e-05	0.926745
WBGene00010593	-0.458379	-0.221421	-0.597062	-0.127536	0.274338	0.0339552	1.88e-08	0.0004986	1.15e-22	0.00927166	7.72e-06	0.558034
WBGene00010609	0.387646	0.193952	-0.597408	-0.142644	-0.310727	0.0401213	5.65e-08	0.000480186	8.5e-23	0.00365989	1.09e-05	0.548739
WBGene00010677	0.496207	0.310932	-0.601604	-0.131309	-0.177065	-0.0121896	2.63e-08	3.06e-06	9.57e-25	0.00592536	0.00173919	0.82204
WBGene00010690	0.48727	0.205418	-0.54554	-0.143973	-0.545797	0.0407375	9.39e-14	0.000535911	9.47e-17	0.0034227	7.53e-15	0.517707
WBGene00010701	-0.411147	-0.304891	-0.600999	-0.147694	0.192552	-0.0376681	1.45e-09	8.15e-10	1.01e-26	0.00127405	0.0102772	0.604052
WBGene00010727	-0.461203	-0.327669	-0.584225	-0.171394	0.231982	-0.105955	1.84e-10	1.55e-09	6.13e-25	0.000240465	0.000801064	0.111443
WBGene00010814	0.349537	0.154448	-0.605224	-0.150781	-0.346017	0.100356	5.82e-07	0.00515901	1.87e-22	0.00259026	1.47e-06	0.141155
WBGene00011006	-0.326077	-0.119218	-0.613435	-0.148731	0.377731	-0.110761	1.74e-06	0.0288637	3.05e-22	0.00325736	1.96e-07	0.110376
WBGene00011059	-0.524498	-0.362536	-0.595035	-0.180554	0.173341	-0.110296	4.12e-14	2.36e-12	7.55e-26	0.000119704	0.00599559	0.0703548
WBGene00011061	0.351186	0.202529	-0.612964	-0.157567	-0.233022	0.1063	3.3e-06	0.000388197	3e-24	0.0015218	0.000529439	0.0994083
WBGene00011095	-0.409611	-0.28629	-0.602666	-0.118967	0.226197	0.0659937	1.34e-09	9.02e-09	3.12e-26	0.0102462	0.00240512	0.366849
WBGene00011124	-0.324168	-0.117285	-0.618768	-0.138289	0.352783	-0.0148354	2.97e-06	0.030734	6.46e-23	0.00584316	1.38e-06	0.831086
WBGene00011182	-0.369831	-0.217431	-0.611278	-0.144008	0.206809	-0.0474964	2.11e-06	0.000194163	1.08e-24	0.00314306	0.00172737	0.453376
WBGene00011320	0.371444	0.184769	-0.611744	-0.149278	-0.248356	0.0816455	3.67e-06	0.00259864	9.01e-24	0.00266673	8.83e-05	0.176357
WBGene00011436	-0.340687	-0.201157	-0.606367	-0.150651	0.246197	-0.0822224	8.13e-07	0.000113706	2.48e-24	0.00203573	0.000898012	0.248668
WBGene00011464	0.359462	0.198742	-0.611186	-0.134745	-0.240898	-0.00524564	7.61e-07	0.000285029	2.5e-24	0.00590644	0.000669936	0.938379
WBGene00011526	0.319076	0.154123	-0.615051	-0.13222	-0.264769	-0.0132967	2.95e-06	0.00296702	5.3e-24	0.00743867	0.000402688	0.85377
WBGene00011527	0.525575	0.278646	-0.524016	-0.151966	-0.476359	0.065982	4.15e-15	1.61e-06	1.47e-17	0.00144722	6.35e-12	0.296408
WBGene00011629	-0.322782	-0.160578	-0.614151	-0.140194	0.262611	-0.0396149	4.5e-06	0.00262664	4.69e-24	0.00452679	0.000328057	0.570779
WBGene00011642	0.424564	0.248195	-0.568066	-0.187384	-0.377509	0.201854	6.64e-10	1.02e-05	7.38e-21	0.000179771	7.64e-08	0.0024164
WBGene00011662	0.336853	0.117094	-0.618015	-0.141029	-0.356973	0.0418147	1.91e-06	0.0361409	1.37e-22	0.00505911	6.42e-07	0.535582
WBGene00011664	0.322889	0.134348	-0.618003	-0.123893	-0.304187	-0.075309	2.96e-06	0.0115191	1.18e-23	0.0129621	3.94e-05	0.289274
WBGene00011679	-0.36354	-0.246235	-0.620744	-0.13472	0.156097	0.0049009	1.84e-06	1e-05	4.54e-26	0.00512465	0.0221806	0.940757
WBGene00011753	-0.500181	-0.2139	-0.556471	-0.155692	0.488722	-0.0893	1.6e-12	0.000669653	1.5e-17	0.00177878	1.01e-13	0.130966
WBGene00011830	-0.374167	-0.22968	-0.601528	-0.123218	0.233224	0.0571554	2.06e-08	4.61e-06	1.06e-24	0.00991134	0.00165433	0.434643
WBGene00011832	-0.369368	-0.170446	-0.603634	-0.139966	0.323773	-0.0284903	2.06e-07	0.00210177	9.61e-23	0.00464338	5.55e-06	0.673218
WBGene00011885	0.407133	0.268481	-0.612372	-0.156617	-0.168799	0.0755463	8.51e-07	1.18e-05	3.46e-25	0.00127571	0.00625298	0.204377
WBGene00011897	0.352105	0.223338	-0.616915	-0.151127	-0.201029	0.060518	1.68e-06	4.26e-05	3.89e-25	0.00203746	0.00430555	0.372536
WBGene00011986	0.449046	0.241066	-0.570861	-0.148958	-0.353575	0.0631213	1.49e-10	1.67e-05	2.18e-21	0.00202133	4.49e-07	0.3379
WBGene00011995	-0.336458	-0.263719	-0.627091	-0.142469	0.136199	-0.018792	1.18e-06	1.22e-07	1.26e-27	0.0024957	0.0698471	0.798029
WBGene00012113	-0.351279	-0.276519	-0.621193	-0.146906	0.128547	-0.0387165	3.22e-07	2.33e-08	1.15e-27	0.00161927	0.0877427	0.597917
WBGene00012123	-0.476901	-0.276693	-0.558729	-0.157142	0.377059	-0.0704075	2.93e-12	4.31e-07	4.82e-21	0.00100972	1.3e-07	0.295111
WBGene00012226	-0.343649	-0.235852	-0.617177	-0.117113	0.150057	0.075674	3.44e-07	1.85e-06	2.37e-26	0.013736	0.0463016	0.308357
WBGene00012251	-0.422436	-0.289941	-0.611284	-0.101308	0.150396	0.107899	5.83e-08	4.62e-07	2.46e-26	0.0315665	0.021656	0.0891767
WBGene00012382	-0.376736	-0.151163	-0.602007	-0.171788	0.390308	-0.233212	3.28e-07	0.0154228	9.6e-21	0.00104375	8.96e-10	9.92e-05
WBGene00012428	-0.381132	-0.237989	-0.590176	-0.178147	0.288278	-0.179771	6.18e-08	1.4e-05	3.02e-23	0.000317238	4.47e-05	0.00801342
WBGene00012452	-0.420305	-0.208825	-0.586344	-0.14321	0.357958	-0.0332285	2.02e-09	0.000171409	9.16e-22	0.00345737	4.95e-07	0.620248
WBGene00012544	-0.355751	-0.196944	-0.604025	-0.159652	0.286269	-0.117742	5.3e-07	0.00031296	1.91e-23	0.0013127	6.23e-05	0.084991
WBGene00012795	0.35609	0.167241	-0.605595	-0.146477	-0.323108	0.0622744	3.69e-07	0.00216959	7.61e-23	0.00321715	7.98e-06	0.363664
WBGene00012802	0.356327	0.117413	-0.624777	-0.121721	-0.295644	-0.124364	1.91e-06	0.0458263	2.76e-23	0.0164372	1.13e-05	0.0521909
WBGene00012812	-0.368265	-0.214321	-0.608836	-0.157248	0.242397	-0.0953644	8.32e-07	0.000155743	4.69e-24	0.00147441	0.000386162	0.145304
WBGene00012875	-0.354967	-0.214957	-0.610265	-0.162142	0.239008	-0.116027	1.3e-06	0.00010775	2.77e-24	0.00107068	0.000609764	0.083667
WBGene00013029	0.332211	0.138046	-0.610191	-0.139542	-0.326324	0.0383966	9.02e-07	0.00902743	7.13e-23	0.00503087	1.2e-05	0.589198
WBGene00013297	-0.399737	-0.187359	-0.601867	-0.147392	0.313519	-0.0543566	5.09e-08	0.00110895	1.94e-22	0.00303433	4.64e-06	0.40071
WBGene00013349	0.320984	0.170682	-0.61636	-0.131686	-0.236824	-0.0212921	3.43e-06	0.00102246	1.57e-24	0.00739568	0.00151599	0.767123
WBGene00013380	0.318245	0.169204	-0.608032	-0.158394	-0.281757	0.13361	2.68e-06	0.00120963	1.47e-23	0.0015129	0.000113864	0.0628786
WBGene00013481	-0.472177	-0.32211	-0.572568	-0.189289	0.285691	-0.155246	3.69e-11	5.89e-09	4.5e-23	8.25e-05	3.07e-05	0.0178956
WBGene00013489	-0.557253	-0.364977	-0.506606	-0.176458	0.419393	-0.110474	1.56e-17	1.52e-11	2.93e-19	0.000106265	3.41e-09	0.0940766
WBGene00013514	-0.347083	-0.10554	-0.619741	-0.13767	0.382779	-0.012688	1.02e-06	0.0629629	2.93e-22	0.00626086	7.21e-08	0.849006
WBGene00013529	0.360473	0.198756	-0.608688	-0.125522	-0.260461	-0.0495181	2.76e-07	0.000175928	3.04e-24	0.0100548	0.000363468	0.481129
WBGene00013531	-0.381107	-0.218048	-0.599012	-0.14109	0.280951	-0.0251513	4.84e-08	4.04e-05	9.38e-24	0.0036037	0.00011444	0.718626
WBGene00013532	0.392288	0.193425	-0.587679	-0.145267	-0.348947	0.0614925	7.68e-09	0.00032407	5.54e-22	0.00300332	1.84e-06	0.374235
WBGene00013693	-0.328406	-0.250306	-0.626421	-0.138044	0.148635	-0.00599434	1.7e-06	4.31e-07	2.58e-27	0.00354728	0.0487522	0.935647
WBGene00013724	0.448037	0.286949	-0.56514	-0.156438	-0.303644	0.0855602	1.43e-11	2.23e-08	5.96e-23	0.000791008	4.08e-05	0.226612
WBGene00013859	-0.354898	-0.200672	-0.607321	-0.139418	0.254661	-0.0190864	3.69e-07	0.000141083	3.19e-24	0.00425983	0.000529646	0.786262
WBGene00013878	0.504313	0.2433	-0.556499	-0.133583	-0.414913	-0.0039978	1.41e-12	4.46e-05	2.11e-19	0.00570617	6.58e-10	0.948464
WBGene00013882	-0.356098	-0.207552	-0.607669	-0.154193	0.25009	-0.0878925	9.29e-07	0.000159444	3.94e-24	0.00172496	0.000397232	0.194811
WBGene00013894	0.35621	0.128762	-0.615933	-0.137024	-0.323122	0.0185131	1.73e-06	0.0276806	7.52e-23	0.00612559	2.02e-06	0.77256
WBGene00014001	-0.331091	-0.165798	-0.611653	-0.146787	0.290206	-0.0634602	2.24e-06	0.00196101	1.22e-23	0.0031154	7.17e-05	0.36506
WBGene00014076	-0.330051	-0.150559	-0.615767	-0.121579	0.286231	0.0980117	1.49e-06	0.00420588	8.02e-24	0.0144686	0.00010647	0.170402
WBGene00014207	-0.356057	-0.21745	-0.613066	-0.146728	0.224493	-0.0464782	7.5e-07	5.16e-05	8.58e-25	0.00270767	0.00164213	0.497029
WBGene00014262	-0.375304	-0.279967	-0.623695	-0.132128	0.1229	0.0104908	1.03e-06	4.6e-07	3.89e-27	0.00514063	0.0694151	0.872869
WBGene00014965	0.324685	0.130156	-0.61901	-0.130392	-0.303866	-0.0377215	3.85e-06	0.0163196	1.65e-23	0.00900516	3.11e-05	0.586923
WBGene00015044	-0.331493	-0.222248	-0.621666	-0.12787	0.164629	0.0316079	3.06e-06	1.91e-05	4e-26	0.00789792	0.0248924	0.656498
WBGene00015061	-0.377998	-0.151141	-0.598851	-0.132414	0.383655	0.0220875	1.88e-08	0.00521051	1.17e-21	0.00760559	1.95e-07	0.750448
WBGene00015102	0.317773	0.229034	-0.62326	-0.13688	-0.163231	0.0159834	3.68e-06	4.31e-06	1.23e-26	0.00415641	0.0302176	0.828659
WBGene00015141	-0.313265	-0.174729	-0.608993	-0.162991	0.280134	-0.150899	4.22e-06	0.000848495	9.26e-24	0.0011351	0.000119986	0.0354904
WBGene00015145	0.414557	0.192825	-0.588571	-0.139508	-0.354607	0.0266501	4.75e-09	0.000637255	9.6e-22	0.00444941	4.25e-07	0.685342
WBGene00015357	0.346929	0.20534	-0.612818	-0.132691	-0.230875	-0.0192225	6.07e-07	7.76e-05	8.11e-25	0.00641316	0.00188934	0.788099
WBGene00015449	-0.416013	-0.305083	-0.606424	-0.192404	0.169766	-0.183178	7.98e-07	1.74e-06	4.01e-25	0.000104126	0.0038915	0.00139659
WBGene00015472	-0.448683	-0.323403	-0.597474	-0.125252	0.191159	0.0322438	2.16e-10	4.34e-10	1.35e-26	0.00585623	0.00774522	0.641896
WBGene00015591	0.386954	0.19892	-0.58693	-0.151403	-0.345226	0.0819648	8.81e-09	0.000183987	4.55e-22	0.00201839	2.75e-06	0.242033
WBGene00015780	-0.44194	-0.25298	-0.579735	-0.141836	0.31147	-0.026559	3.43e-10	3.77e-06	1.23e-22	0.00305389	1.01e-05	0.690547
WBGene00015802	-0.408302	-0.258692	-0.596268	-0.170918	0.239929	-0.13748	1.23e-07	1.19e-05	7.47e-24	0.000494826	0.000227723	0.0279329
WBGene00015803	-0.455177	-0.230234	-0.602203	-0.159981	0.260114	-0.0932077	8.22e-07	0.000938157	1.73e-22	0.0014268	7.28e-06	0.0899601
WBGene00015899	0.340917	0.23572	-0.612676	-0.163008	-0.194994	0.119353	2.25e-06	1.04e-05	1.79e-25	0.000806932	0.00637232	0.0847131
WBGene00015954	-0.37128	-0.19796	-0.610198	-0.135169	0.252791	0.00654326	4.16e-07	0.000371328	5.69e-24	0.00596121	0.000294993	0.921873
WBGene00016018	-0.403486	-0.221658	-0.598472	-0.14209	0.274179	-0.0286263	4.44e-08	8.77e-05	2.06e-23	0.00355836	6.71e-05	0.661923
WBGene00016103	-0.313276	-0.259267	-0.635968	-0.13499	0.0937924	0.00723449	5.38e-06	1.33e-07	2.36e-28	0.00404738	0.215674	0.922697
WBGene00016178	0.356839	0.236992	-0.605868	-0.15087	-0.204439	0.0721439	2.61e-07	4.15e-06	2.95e-25	0.00163844	0.00573317	0.312821
WBGene00016210	-0.359821	-0.237926	-0.618507	-0.14787	0.172054	-0.0496984	3.1e-06	2.82e-05	1.34e-25	0.00235137	0.0104495	0.443392
WBGene00016321	-0.504905	-0.215525	-0.580557	-0.149772	0.370919	-0.0594239	5.46e-10	0.00122843	7.26e-20	0.00266847	5.41e-10	0.280041
WBGene00016346	0.40751	0.0940156	-0.608984	-0.134306	-0.527363	-0.0152419	1.44e-09	0.113555	2.5e-19	0.00770669	8.35e-14	0.811033
WBGene00016390	0.370307	0.206855	-0.596565	-0.15675	-0.291169	0.108072	1.25e-07	0.000131693	3.08e-23	0.00141795	5.26e-05	0.116381
WBGene00016391	0.328207	0.133953	-0.619932	-0.140762	-0.297913	0.0331177	5.57e-06	0.016215	2.05e-23	0.0049936	2.59e-05	0.622172
WBGene00016395	0.377474	0.153638	-0.603768	-0.140907	-0.344089	0.0452972	1.78e-07	0.00739896	3.2e-22	0.00457053	7.08e-07	0.487392
WBGene00016442	0.397333	0.200303	-0.592811	-0.140793	-0.326953	0.0301707	1.61e-08	0.000269478	1.73e-22	0.00399508	4.8e-06	0.65566
WBGene00016485	0.399544	0.26889	-0.618707	-0.131788	-0.166732	-0.0219377	1.92e-07	2.2e-06	6.2e-26	0.00630578	0.0123148	0.732594
WBGene00016564	0.314662	0.137547	-0.614923	-0.14052	-0.319079	0.0420729	3.52e-06	0.0085187	2.14e-23	0.00479079	1.31e-05	0.555097
WBGene00016658	-0.522585	-0.279695	-0.569588	-0.128908	0.330537	0.0311129	6.23e-12	3.75e-06	3.67e-21	0.00757287	2.98e-07	0.606615
WBGene00016722	-0.43558	-0.219693	-0.599631	-0.117153	0.274145	0.086578	1.23e-08	0.000218018	4.46e-23	0.0171351	2.83e-05	0.16454
WBGene00016918	-0.564594	-0.33352	-0.555172	-0.173552	0.318342	-0.106503	1.21e-10	5.88e-06	1.79e-20	0.000344274	5.62e-08	0.0523358
WBGene00016943	-0.403857	-0.096314	-0.624352	-0.139392	0.357828	-0.0375129	7.94e-07	0.150688	1.03e-21	0.00587454	3.05e-09	0.501428
WBGene00017012	-0.411038	-0.229632	-0.597724	-0.145264	0.255421	-0.0500051	8.11e-08	8.8e-05	1.41e-23	0.0027942	0.000112509	0.427541
WBGene00017065	-0.499586	-0.308309	-0.57523	-0.132529	0.270246	0.00940507	2.25e-11	7.78e-08	2.77e-23	0.00465237	4.75e-05	0.88158
WBGene00017119	0.471224	0.294887	-0.556617	-0.14572	-0.32968	0.0374117	6.03e-13	8.32e-09	2.44e-22	0.00163262	9.47e-06	0.598199
WBGene00017265	-0.403547	-0.262717	-0.598211	-0.135975	0.235513	-0.000930019	7.24e-09	4.44e-07	5.95e-25	0.00400736	0.00127397	0.98946
WBGene00017336	-0.323125	-0.22973	-0.620962	-0.160436	0.183291	-0.0980522	4.62e-06	9.54e-06	5.62e-26	0.00100696	0.0129311	0.170986
WBGene00017344	-0.368835	-0.165142	-0.604572	-0.152339	0.337581	-0.0951483	2.47e-07	0.00346625	2.59e-22	0.00238385	1.46e-06	0.150378
WBGene00017362	-0.374273	-0.162266	-0.607845	-0.142737	0.317639	-0.042484	4.33e-07	0.00510856	1.2e-22	0.00416776	3.46e-06	0.511266
WBGene00017440	-0.419012	-0.270638	-0.589605	-0.154052	0.265704	-0.0645654	2.11e-09	3.13e-07	3.58e-24	0.00119613	0.000236096	0.351868
WBGene00017548	0.498762	0.383136	-0.580626	-0.190608	-0.195444	0.150289	4.23e-10	1.58e-10	1.4e-25	3.94e-05	0.00158249	0.0120154
WBGene00017659	-0.3546	-0.205573	-0.602237	-0.13857	0.257134	-0.0334564	1.35e-07	5.21e-05	3.89e-24	0.00417227	0.000507396	0.645449
WBGene00017691	-0.35311	-0.0870033	-0.631536	-0.136964	0.325742	-0.0099221	5.84e-06	0.15925	6.49e-23	0.00683637	3.26e-07	0.867967
WBGene00017698	-0.328915	-0.228234	-0.622469	-0.128222	0.152747	0.0334992	2.08e-06	6.38e-06	1.85e-26	0.00741784	0.0421419	0.646172
WBGene00017733	0.372649	0.247329	-0.608726	-0.153274	-0.196177	0.0761574	5.93e-07	8.04e-06	2.86e-25	0.00147804	0.0043567	0.250656
WBGene00017770	0.354282	0.227456	-0.604368	-0.160611	-0.233831	0.113187	4.41e-07	1.64e-05	1.25e-24	0.000970599	0.00131624	0.10707
WBGene00017780	-0.378675	-0.172068	-0.608163	-0.160502	0.301588	-0.141781	1.49e-06	0.00580539	1.64e-22	0.00157114	1.79e-06	0.0179403
WBGene00017852	0.506206	0.218394	-0.558062	-0.13157	-0.453176	-0.0124374	1.03e-12	0.00036464	1.54e-18	0.00703317	9.07e-12	0.83679
WBGene00017874	-0.505482	-0.220714	-0.588413	-0.138995	0.321812	-0.0078732	2.49e-08	0.000878843	5.84e-21	0.00502456	5.74e-08	0.886666
WBGene00017904	-0.352772	-0.244195	-0.614332	-0.123618	0.176056	0.0406919	1.65e-07	7.55e-07	2.66e-26	0.00893823	0.0185485	0.582792
WBGene00017968	-0.359302	-0.229281	-0.593108	-0.174006	0.26748	-0.166007	9.07e-08	9.32e-06	9.86e-24	0.000391259	0.000290667	0.0209431
WBGene00017986	0.405388	0.285776	-0.589355	-0.163506	-0.224844	0.103867	2.24e-09	1.67e-08	3.34e-25	0.000471339	0.00247294	0.147549
WBGene00018037	0.517561	0.302459	-0.553571	-0.178056	-0.36908	0.13341	3.57e-12	7.78e-07	5.87e-20	0.000275498	7.04e-09	0.0248002
WBGene00018051	-0.401249	-0.192797	-0.606898	-0.136318	0.266573	-0.0105867	3.74e-07	0.00145882	1.96e-23	0.00563735	3.12e-05	0.861504
WBGene00018060	-0.350235	-0.179462	-0.60046	-0.15961	0.330213	-0.131732	3.58e-07	0.000869303	9.81e-23	0.00139258	6.23e-06	0.0592076
WBGene00018146	-0.342775	-0.235725	-0.628304	-0.116508	0.139453	0.0867802	3.39e-06	1.24e-05	1.47e-26	0.0161438	0.0481259	0.205258
WBGene00018217	-0.393271	-0.239082	-0.592706	-0.190654	0.285077	-0.22236	1.76e-07	6.5e-05	1.46e-22	0.000186471	1.19e-05	0.000396575
WBGene00018340	-0.401558	-0.198748	-0.606179	-0.138418	0.265138	-0.0141294	2.9e-07	0.000956311	2.59e-23	0.0049956	4.34e-05	0.818556
WBGene00018349	-0.332138	-0.12304	-0.622935	-0.111746	0.286837	0.191521	3.41e-06	0.0285919	1.06e-23	0.0284293	4.55e-05	0.00471277
WBGene00018373	-0.359875	-0.26046	-0.612586	-0.144159	0.179987	-0.0216681	1.08e-07	1.42e-07	1.75e-26	0.00220829	0.0165646	0.769519
WBGene00018446	0.313091	0.154907	-0.6174	-0.128501	-0.26925	-0.0441877	4.17e-06	0.00258917	2.92e-24	0.00930635	0.000265121	0.542071
WBGene00018465	-0.354075	-0.219413	-0.609919	-0.164252	0.223564	-0.130257	2.78e-06	0.000122556	1.93e-24	0.000911082	0.000946692	0.0457194
WBGene00018519	-0.405994	-0.253568	-0.619244	-0.140973	0.152109	-0.0195747	3.65e-06	8.87e-05	2.51e-25	0.00386295	0.009249	0.727952
WBGene00018522	-0.369925	-0.212865	-0.603301	-0.134479	0.27167	0.00387621	9.47e-08	4.8e-05	3.96e-24	0.00549286	0.000222771	0.956352
WBGene00018532	-0.384485	-0.276885	-0.603725	-0.193743	0.213226	-0.196438	1.89e-07	8.03e-07	1.1e-24	9.68e-05	0.00161741	0.00279219
WBGene00018656	-0.348158	-0.234184	-0.608692	-0.169957	0.222836	-0.141528	9.56e-07	1.15e-05	6.6e-25	0.000541195	0.00195418	0.0419551
WBGene00018718	-0.389235	-0.172207	-0.600686	-0.101672	0.320373	0.182837	1.81e-08	0.00181551	1.07e-22	0.0418875	7.21e-06	0.00737082
WBGene00019006	-0.40812	-0.190314	-0.596332	-0.152784	0.338428	-0.0839988	3.19e-08	0.00118552	6.95e-22	0.00217865	5.65e-07	0.187369
WBGene00019125	0.314853	0.124124	-0.615673	-0.140333	-0.31773	0.0458876	3.12e-06	0.0183962	4.54e-23	0.00499279	1.86e-05	0.520627
WBGene00019203	-0.475668	-0.217828	-0.604176	-0.14369	0.262653	-0.0254553	1.69e-06	0.00154657	2.39e-22	0.00401747	4.01e-06	0.635496
WBGene00019237	-0.319546	-0.223177	-0.615794	-0.156618	0.171761	-0.0948171	2.67e-06	8.65e-06	7.65e-26	0.00120465	0.0225214	0.198691
WBGene00019304	-0.354859	-0.174938	-0.601005	-0.145825	0.319598	-0.0599714	1.88e-07	0.000951384	6.99e-23	0.00312316	1.5e-05	0.395831
WBGene00019332	-0.377481	-0.167651	-0.603445	-0.144298	0.33903	-0.0464214	1.38e-07	0.0029625	2.29e-22	0.00373722	1.49e-06	0.485138
WBGene00019477	-0.36924	-0.252583	-0.611678	-0.101279	0.184543	0.128104	3.45e-08	3.39e-07	2.83e-26	0.0321976	0.0126793	0.0821758
WBGene00019540	-0.508364	-0.329173	-0.541177	-0.166533	0.365637	-0.0916969	2.44e-14	5.06e-10	1.86e-21	0.000307743	4.12e-07	0.17901
WBGene00019611	0.389457	0.00231177	-0.657063	-0.13539	-0.614088	0.0415645	1.59e-08	0.971439	1.79e-19	0.00769678	9.39e-20	0.479556
WBGene00019647	-0.398531	-0.189139	-0.603566	-0.136436	0.303508	0.00300821	5e-08	0.000861241	7.89e-23	0.0057641	1.21e-05	0.963512
WBGene00019663	-0.349402	-0.198449	-0.610256	-0.139551	0.246552	-0.0187842	7.05e-07	0.000181739	2.23e-24	0.00431155	0.000737361	0.788437
WBGene00019682	-0.472467	-0.27861	-0.603225	-0.144895	0.190067	-0.038952	2.55e-07	5.32e-05	2.7e-24	0.00278181	0.000537194	0.457952
WBGene00019727	-0.509367	-0.262332	-0.59123	-0.142935	0.266875	-0.0223573	9.41e-09	0.000144686	3.6e-22	0.00369047	2.34e-06	0.674278
WBGene00019799	0.328144	0.22713	-0.619032	-0.142654	-0.166766	0.0315153	2.52e-06	8.54e-06	4e-26	0.00298159	0.0252776	0.662964
WBGene00019811	0.340193	0.199595	-0.607711	-0.149046	-0.254943	0.0592234	6.26e-07	0.000107512	2.7e-24	0.00231917	0.000647144	0.413007
WBGene00019813	-0.324703	-0.126968	-0.617116	-0.120349	0.302232	0.105574	1.57e-06	0.0158656	2.09e-23	0.0161811	3.57e-05	0.140228
WBGene00019875	-0.326765	-0.148931	-0.612466	-0.136833	0.294097	-0.0121235	1.61e-06	0.00447304	1.77e-23	0.00577823	8.15e-05	0.865591
WBGene00019882	-0.358442	-0.206395	-0.597516	-0.164416	0.296196	-0.137016	2.09e-07	0.000112132	2.78e-23	0.000889502	4.71e-05	0.0502162
WBGene00019893	0.360476	0.197747	-0.603169	-0.15053	-0.297934	0.0707002	2.24e-07	0.000206668	1.62e-23	0.0022196	4.7e-05	0.313646
WBGene00019895	-0.3756	-0.221342	-0.591528	-0.162781	0.310256	-0.117093	3.16e-08	2.49e-05	3.56e-23	0.000882909	2.35e-05	0.0994287
WBGene00019947	0.445617	0.129648	-0.598948	-0.134234	-0.447551	-0.000609081	1.37e-09	0.0394581	7.33e-20	0.00724248	6.97e-12	0.991793
WBGene00019963	0.32584	0.138258	-0.611372	-0.149421	-0.326584	0.10718	2.58e-06	0.0110249	6.8e-23	0.00290718	7.31e-06	0.121724
WBGene00019983	0.439305	0.248869	-0.579618	-0.133355	-0.314497	-0.00774675	2.21e-10	3.84e-06	1.15e-22	0.00523215	1.23e-05	0.909504
WBGene00020035	0.342427	0.206828	-0.616365	-0.152391	-0.214964	0.0747221	3.43e-06	0.000173903	8.96e-25	0.00199473	0.00218092	0.268623
WBGene00020088	0.329962	0.12472	-0.619658	-0.1237	-0.315219	-0.0959235	2.21e-06	0.0214846	2.28e-23	0.0137253	1.62e-05	0.168241
WBGene00020089	0.315086	0.119332	-0.617771	-0.135646	-0.319753	0.010479	3.42e-06	0.0238179	3.57e-23	0.00662323	1.71e-05	0.883165
WBGene00020091	0.495191	0.240609	-0.57137	-0.135162	-0.355132	0.00316172	6.58e-11	9.45e-05	1.17e-20	0.00532206	3.21e-08	0.957798
WBGene00020215	-0.36713	-0.31373	-0.636341	-0.132059	0.0727595	0.0109393	6.82e-07	2.07e-09	2.89e-29	0.00401118	0.303375	0.873603
WBGene00020284	0.347884	0.123359	-0.618001	-0.129511	-0.327906	-0.0440463	1.69e-06	0.0302755	6.24e-23	0.00967906	2.79e-06	0.505408
WBGene00020287	0.49196	0.267898	-0.557709	-0.136812	-0.366041	0.0127118	2.38e-12	2.24e-06	8.24e-21	0.00396342	1.19e-07	0.844073
WBGene00020320	0.326061	0.129045	-0.615739	-0.137812	-0.32359	0.0234047	2.66e-06	0.0169016	4.06e-23	0.00576543	1.01e-05	0.73685
WBGene00020369	-0.410432	-0.21103	-0.611793	-0.145622	0.22762	-0.0422525	9.59e-07	0.000905146	1.1e-23	0.00333827	0.000168387	0.463835
WBGene00020382	-0.335737	-0.276645	-0.637616	-0.144475	0.0943124	-0.0215942	4.65e-06	1.32e-07	3.87e-28	0.00239748	0.187704	0.756219
WBGene00020479	-0.311996	-0.199182	-0.623451	-0.11045	0.17262	0.123048	3.88e-06	6.67e-05	5.6e-26	0.0232295	0.0199343	0.0958307
WBGene00020530	-0.360005	-0.215968	-0.598892	-0.149772	0.253386	-0.0628817	7.72e-08	2.13e-05	5.07e-24	0.00198318	0.000603934	0.387243
WBGene00020581	-0.339935	-0.192929	-0.608279	-0.147042	0.257054	-0.060918	1.01e-06	0.000241784	3.58e-24	0.00269894	0.000481285	0.390128
WBGene00020732	-0.32298	-0.17219	-0.615386	-0.139306	0.2427	-0.0252164	4.47e-06	0.00115578	2.1e-24	0.00466931	0.000941837	0.720302
WBGene00020808	-0.618271	-0.385122	-0.569886	-0.14861	0.223129	-0.0377384	3.14e-11	8.33e-08	6.36e-23	0.00152916	2.08e-05	0.447391
WBGene00020836	-0.356757	-0.205318	-0.611686	-0.128787	0.231666	0.0325562	6.14e-07	0.000127523	1.2e-24	0.00814224	0.00131149	0.638811
WBGene00020917	-0.347298	-0.221896	-0.614912	-0.153143	0.20163	-0.0773166	2.81e-06	5.67e-05	4.13e-25	0.00173604	0.00386386	0.250811
WBGene00021248	0.520834	0.271249	-0.537805	-0.120166	-0.436523	-0.0522066	7.42e-15	1.65e-06	6.66e-19	0.0112778	5.17e-10	0.420009
WBGene00021628	0.451236	0.166215	-0.58931	-0.129018	-0.408767	-0.0327057	7.45e-10	0.00656496	2.48e-20	0.00926361	6.93e-10	0.592037
WBGene00021645	-0.465072	-0.320406	-0.569597	-0.183236	0.283961	-0.146463	5.19e-11	4.34e-09	1.83e-23	0.000105927	4.49e-05	0.0281676
WBGene00021709	-0.381381	-0.244577	-0.604274	-0.136851	0.23477	-0.000390672	3.97e-08	2.27e-06	5.13e-25	0.00416531	0.0014565	0.995624
WBGene00021835	-0.378238	-0.293908	-0.629829	-0.138903	0.10145	-0.00919833	1.84e-06	2.49e-07	1.32e-27	0.00335207	0.121506	0.884849
WBGene00021956	0.314541	0.173959	-0.612571	-0.15518	-0.268135	0.106828	4.57e-06	0.000856204	4.46e-24	0.00180629	0.000311417	0.138251
WBGene00021960	0.337613	0.15207	-0.616036	-0.136897	-0.266093	0.0197601	5.13e-06	0.00711906	7.84e-24	0.00575292	0.000123784	0.764735
WBGene00022072	-0.382594	-0.224009	-0.604087	-0.168024	0.256868	-0.138749	4.55e-07	0.00012227	1.45e-23	0.000760058	0.000105966	0.0289306
WBGene00022117	0.36259	0.22868	-0.611992	-0.14783	-0.213573	0.0545802	6.54e-07	2.4e-05	4.76e-25	0.00236345	0.00224637	0.416013
WBGene00022131	-0.362782	-0.301553	-0.624663	-0.170187	0.117862	-0.111604	8.63e-07	1.39e-08	7.24e-28	0.000311182	0.0933241	0.102792
WBGene00022178	-0.343444	-0.220309	-0.614837	-0.127075	0.206562	0.0430683	5.66e-07	1.41e-05	1.47e-25	0.00825545	0.00574869	0.554636
WBGene00022245	-0.629805	-0.38848	-0.495989	-0.165654	0.421816	-0.0737198	2.68e-18	2.25e-10	1.98e-17	0.000325034	3.97e-11	0.20732
WBGene00022250	0.333433	0.119891	-0.616525	-0.136921	-0.359956	0.012305	1.56e-06	0.0280685	1.05e-22	0.00627245	8.2e-07	0.858751
WBGene00022508	0.372598	0.18039	-0.594971	-0.149172	-0.373325	0.0684328	3.9e-08	0.000747044	3.52e-22	0.00256044	2.45e-07	0.326256
WBGene00022599	0.35193	0.225323	-0.60523	-0.154867	-0.226156	0.0879804	3.6e-07	1.37e-05	8.33e-25	0.00138143	0.00224112	0.217571
WBGene00022854	-0.394235	-0.133802	-0.601823	-0.129098	0.423985	0.0430131	1.1e-08	0.0184942	5.13e-21	0.00973347	2.82e-09	0.516893
WBGene00022887	-0.470703	-0.286228	-0.557567	-0.135206	0.349632	0.00032822	5.85e-13	2.42e-08	4.26e-22	0.00357942	1.61e-06	0.996287
WBGene00043068	-0.339598	-0.0844855	-0.625266	-0.135719	0.406346	0.00255031	1.44e-06	0.137388	3.67e-22	0.0071604	1.2e-08	0.969455
WBGene00044019	-0.38089	-0.181607	-0.61609	-0.149545	0.248084	-0.06946	2.54e-06	0.00337097	1.6e-23	0.00286486	7.11e-05	0.242813
WBGene00044324	0.508813	0.184106	-0.582001	-0.132031	-0.410482	-0.0112024	8.38e-11	0.00578115	1.57e-19	0.00764981	1.43e-11	0.839277
WBGene00044329	0.37494	0.234636	-0.610006	-0.144354	-0.199489	0.0437823	9.81e-07	3.85e-05	5.78e-25	0.00284934	0.00299622	0.497967
WBGene00044481	-0.347952	-0.230985	-0.608484	-0.160484	0.213786	-0.114252	1.14e-06	1.51e-05	4.79e-25	0.000965394	0.00290109	0.0995343
WBGene00045418	0.468486	0.236429	-0.571301	-0.139459	-0.363525	0.0221062	8.66e-11	4.93e-05	6.09e-21	0.00394919	8.35e-08	0.727069
WBGene00185067	0.380897	0.168863	-0.599969	-0.138943	-0.337252	0.0272855	7.63e-08	0.0025008	2.37e-22	0.00491314	1.98e-06	0.683289
WBGene00194674	-0.389627	-0.188187	-0.594138	-0.138855	0.362912	-0.0045127	1.12e-08	0.000455099	3.18e-22	0.0047504	7.3e-07	0.948454

## Sheet: BetaAnalysisELO
gene	Beta1	Beta2	Beta3	Beta4	Beta5	Beta6	pval_Beta1	pval_Beta2	pval_Beta3	pval_Beta4	pval_Beta5	pval_Beta6
WBGene00000183	-0.336314	-0.32037	0.0925899	0.380632	-0.268128	0.0222175	3.9146e-06	5.78317e-06	0.177957	1.95219e-08	6.69096e-05	0.728223
WBGene00004058	-0.361539	-0.351671	0.226833	0.327309	0.117206	-0.126076	1.00676e-06	3.97609e-07	0.000501458	7.53866e-07	0.103546	0.0722747
WBGene00006593	-0.335591	-0.259383	0.101599	0.345879	-0.234003	-0.0932978	0.000208208	0.00135965	0.150714	4.77201e-07	0.000209619	0.122308
WBGene00009349	0.353766	0.288045	0.128251	0.337217	0.177767	0.121879	2.22951e-06	4.52292e-05	0.0564974	6.45864e-07	0.0121371	0.075893
WBGene00011044	-0.355519	-0.338664	0.103702	0.377808	-0.200663	0.0189865	1.37745e-06	9.47321e-07	0.117492	1.33965e-08	0.00623762	0.788934
WBGene00011573	0.357732	0.309573	0.0787224	0.349385	0.311118	0.0790598	7.29801e-07	9.92739e-06	0.251154	1.70809e-07	2.41668e-05	0.259554
WBGene00013212	0.345969	0.306999	0.135164	0.355459	0.12619	0.0646091	4.12363e-06	9.80436e-06	0.0408457	9.71693e-08	0.0784319	0.352679
WBGene00017201	0.434677	0.393484	0.0936281	0.353988	0.176962	0.0568607	6.56354e-08	1.93934e-07	0.152164	5.37126e-08	0.00778503	0.374671
WBGene00019373	0.326334	0.256403	0.116692	0.336329	0.199453	0.137861	5.34103e-06	0.000174888	0.0861996	7.45615e-07	0.00708056	0.0604685
WBGene00020091	-0.368167	-0.360076	0.0390073	0.376243	-0.355132	0.00316172	3.67998e-07	1.14529e-06	0.585652	2.0906e-08	3.21237e-08	0.957798
WBGene00021813	0.337517	0.293946	0.187199	0.331929	-0.0123308	0.150746	1.01165e-05	1.29341e-05	0.00444263	9.96955e-07	0.854002	0.0216431

## Sheet: Beta1and2_all_Brood
gene	Beta1	Beta1_pval	Beta2	Beta2_pval
WBGene00000001	0.148458	0.0357	0.0979567	0.0561222
WBGene00000002	-0.314998	3.04756e-06	-0.246531	3.66e-07
WBGene00000003	-0.143489	0.0398001	-0.113294	0.0249219
WBGene00000004	-0.132511	0.0574819	-0.156818	0.00170844
WBGene00000005	-0.225983	0.00149663	-0.163827	0.00152404
WBGene00000007	-0.0554244	0.434612	-0.00299946	0.953414
WBGene00000010	0.149757	0.040441	0.0698435	0.18842
WBGene00000018	-0.0629976	0.38964	-0.0625275	0.235175
WBGene00000020	-0.211985	0.0025637	-0.130174	0.0109717
WBGene00000022	-0.177616	0.0369652	-0.103471	0.0933614
WBGene00000035	-0.0632336	0.364012	-0.0282658	0.573102
WBGene00000036	-0.249477	0.000306357	-0.141952	0.00543053
WBGene00000039	-0.211271	0.00218359	-0.227896	2.96e-06
WBGene00000040	-0.0845148	0.24876	-0.105456	0.0464905
WBGene00000041	-0.0206571	0.784877	-0.0467226	0.391665
WBGene00000063	-0.108964	0.135802	-0.0627476	0.233261
WBGene00000064	0.323137	8.13342e-06	0.131531	0.0184677
WBGene00000065	-0.20015	0.00671655	-0.0827527	0.128251
WBGene00000066	-0.466846	7.651e-10	-0.337773	1.69e-09
WBGene00000067	-0.333884	6.12457e-05	-0.20954	0.000623248
WBGene00000068	-0.227433	0.000960174	-0.119391	0.018301
WBGene00000070	-0.338131	5.87975e-07	-0.202747	6.09e-05
WBGene00000071	-0.0824764	0.240008	-0.0107164	0.834043
WBGene00000072	-0.264597	0.000282601	-0.0881589	0.110657
WBGene00000073	0.0343695	0.638148	-0.00480358	0.927242
WBGene00000074	0.21632	0.00851944	0.111205	0.0667793
WBGene00000075	0.113453	0.111751	0.0550206	0.285855
WBGene00000079	-0.113571	0.170894	-0.0939216	0.115399
WBGene00000080	-0.0306174	0.696173	-0.0431899	0.442642
WBGene00000083	-0.319603	2.37311e-06	-0.166966	0.00117477
WBGene00000084	-0.123016	0.0810076	-0.0248511	0.629225
WBGene00000086	-0.338149	4.87658e-07	-0.183612	0.000310391
WBGene00000088	-0.0728568	0.301942	-0.0226583	0.65699
WBGene00000090	0.0785023	0.301848	0.137083	0.0117749
WBGene00000092	-0.108802	0.123004	-0.133371	0.00810377
WBGene00000093	0.266509	0.000182997	0.103645	0.0542066
WBGene00000094	0.104047	0.153542	0.136162	0.0089535
WBGene00000095	0.17157	0.0211773	0.0238456	0.668639
WBGene00000097	0.271937	0.000184733	0.117205	0.0321658
WBGene00000098	0.220859	0.00168494	0.152682	0.00298579
WBGene00000099	0.151068	0.0290733	0.0645764	0.200328
WBGene00000100	-0.212697	0.00326202	-0.207403	5.41e-05
WBGene00000101	-0.0916153	0.256993	0.00865652	0.882224
WBGene00000102	0.111591	0.134958	0.125524	0.0188498
WBGene00000103	-0.231762	0.000861972	-0.11552	0.0242609
WBGene00000105	-0.135237	0.0648828	-0.136734	0.00909401
WBGene00000106	0.0163655	0.839764	-0.085409	0.145285
WBGene00000107	-0.138139	0.132962	-0.0956724	0.147933
WBGene00000109	-0.124379	0.0887998	-0.0307025	0.563296
WBGene00000110	-0.12722	0.100826	-0.107015	0.0542822
WBGene00000111	-0.28003	0.00194984	-0.160851	0.0144667
WBGene00000112	-0.286305	0.000365793	-0.195202	0.000832192
WBGene00000113	-0.0649622	0.430631	-0.0391535	0.508463
WBGene00000114	-0.188728	0.0254436	-0.0316706	0.611734
WBGene00000115	-0.468354	9.30306e-09	-0.327706	1.12e-07
WBGene00000116	-0.167104	0.0271924	-0.174821	0.00121047
WBGene00000117	0.0257341	0.715098	-0.00831604	0.869852
WBGene00000118	-0.444245	7.03343e-10	-0.212658	0.000290035
WBGene00000120	-0.0693082	0.338898	-0.233277	6.9e-06
WBGene00000121	0.248322	0.000343467	0.194025	0.000101948
WBGene00000122	0.226836	0.00294134	-0.0417928	0.480808
WBGene00000123	0.211612	0.025122	-0.00146549	0.983403
WBGene00000133	-0.348528	2.06327e-06	-0.198484	0.000702392
WBGene00000136	-0.0319689	0.665302	0.0356001	0.50422
WBGene00000137	0.124462	0.0829004	-0.00660935	0.900764
WBGene00000138	-0.216708	0.00205974	-0.151141	0.0029482
WBGene00000140	-0.438433	1.61276e-08	-0.236218	9.08e-05
WBGene00000142	0.109611	0.138791	0.107605	0.0435421
WBGene00000143	0.066372	0.41165	0.0768114	0.18479
WBGene00000144	0.181526	0.00846289	0.0916755	0.0771172
WBGene00000145	0.174756	0.0171676	0.0823473	0.12816
WBGene00000146	0.197962	0.0136937	0.17846	0.00185419
WBGene00000147	0.309511	1.78429e-05	0.145582	0.00826568
WBGene00000148	-0.0781277	0.29082	-0.0271444	0.610484
WBGene00000149	-0.349178	4.18183e-07	-0.223265	1.66e-05
WBGene00000150	-0.210343	0.00229211	-0.112786	0.0255654
WBGene00000151	-0.0556534	0.454938	0.0705195	0.194484
WBGene00000155	0.125917	0.0914934	0.106705	0.0459595
WBGene00000156	-0.198394	0.0117686	-0.0917124	0.110154
WBGene00000157	0.0672108	0.365651	-0.0570585	0.29396
WBGene00000158	-0.122996	0.102605	-0.0771535	0.155138
WBGene00000159	0.0590758	0.425499	0.018634	0.727689
WBGene00000160	0.0590123	0.423061	-0.0157968	0.766847
WBGene00000161	-0.0658091	0.365176	-0.0881371	0.0912267
WBGene00000162	-0.031665	0.687667	0.0479726	0.398659
WBGene00000163	0.015044	0.833392	0.0596535	0.24588
WBGene00000164	0.0187874	0.787539	-0.0688887	0.172525
WBGene00000165	0.0101163	0.906313	0.0464594	0.451162
WBGene00000168	0.0323165	0.654582	0.0683058	0.189216
WBGene00000169	0.00678806	0.924136	-0.00168195	0.973809
WBGene00000170	-0.266794	9.6832e-05	-0.241709	6.42e-07
WBGene00000172	-0.115441	0.128524	-0.0678351	0.220021
WBGene00000175	-0.400569	1.43728e-08	-0.167963	0.00309252
WBGene00000176	-0.04949	0.55694	-0.0835444	0.167595
WBGene00000178	-0.239809	0.00056287	-0.144942	0.00431184
WBGene00000179	-0.185469	0.0137362	-0.192636	0.000394955
WBGene00000180	-0.0822777	0.254547	-0.112527	0.0299745
WBGene00000181	-0.046136	0.556419	-0.0564315	0.316429
WBGene00000182	0.0334556	0.669717	-0.0158723	0.778479
WBGene00000183	0.357927	2.48017e-06	0.164828	0.00463025
WBGene00000184	0.0971863	0.165872	0.0801747	0.111727
WBGene00000186	0.0650692	0.3908	0.0309427	0.575127
WBGene00000187	0.0968085	0.173122	0.0288752	0.579352
WBGene00000189	-0.0101339	0.88854	-0.0421876	0.417314
WBGene00000192	0.134453	0.0584506	0.0904579	0.0772343
WBGene00000195	0.0934106	0.189853	-0.063065	0.231291
WBGene00000196	0.000704172	0.9924	0.0577983	0.278364
WBGene00000197	0.0594541	0.446175	0.0763668	0.171508
WBGene00000198	0.0685927	0.351237	0.0266394	0.617361
WBGene00000199	0.0227337	0.7462	-0.0312233	0.537206
WBGene00000200	0.0503435	0.48168	0.0222622	0.666219
WBGene00000201	0.157612	0.0273943	0.092392	0.0745938
WBGene00000202	0.0900515	0.337326	0.0363129	0.589053
WBGene00000203	0.217146	0.00241275	0.0893579	0.0910417
WBGene00000204	0.150597	0.0328118	0.106526	0.0370168
WBGene00000205	0.242268	0.000987421	0.0935532	0.0922074
WBGene00000206	-0.00346121	0.963104	0.0108296	0.841479
WBGene00000207	-0.514093	8.30783e-08	-0.372011	1.07e-07
WBGene00000208	0.142094	0.0508433	0.0144608	0.786964
WBGene00000209	-0.0201503	0.78677	0.00517274	0.923044
WBGene00000210	-0.0765185	0.302557	-0.0342208	0.522562
WBGene00000211	-0.123566	0.0871135	-0.169199	0.000990606
WBGene00000212	-0.0505223	0.609167	-0.0638752	0.364361
WBGene00000213	-0.194406	0.00505105	-0.195195	7.82e-05
WBGene00000214	-0.513618	1.68826e-07	-0.264286	0.000385579
WBGene00000215	-0.316619	4.49468e-05	-0.135044	0.0218956
WBGene00000216	-0.0859097	0.263747	-0.074627	0.176568
WBGene00000217	-0.170727	0.0171607	-0.13058	0.0120567
WBGene00000218	0.10069	0.236837	-0.083238	0.187855
WBGene00000219	0.125301	0.244168	0.0128731	0.868065
WBGene00000220	-0.190833	0.00563618	-0.200319	4.21e-05
WBGene00000221	-0.334829	9.62177e-06	-0.167263	0.0032921
WBGene00000222	-0.141171	0.0559462	-0.103374	0.0516168
WBGene00000223	0.131339	0.0991501	0.0473369	0.412201
WBGene00000224	-0.383255	4.97897e-07	-0.254727	5.55e-06
WBGene00000225	-0.313847	7.68857e-06	-0.133714	0.0142577
WBGene00000226	-0.165234	0.0378596	-0.0134555	0.818456
WBGene00000227	0.0502865	0.494136	-0.0524119	0.329852
WBGene00000228	-0.430702	1.70581e-10	-0.262131	3.78e-07
WBGene00000229	-0.0740646	0.306752	-0.0484894	0.352954
WBGene00000230	-0.0468953	0.580064	-0.122979	0.041971
WBGene00000231	0.0330085	0.695329	0.00796356	0.895288
WBGene00000233	-0.20309	0.00323618	-0.0930066	0.0684702
WBGene00000235	-0.0400996	0.617814	-0.145344	0.0116574
WBGene00000236	0.0211006	0.766902	0.029252	0.569798
WBGene00000237	-0.272829	6.91914e-05	-0.198357	6.35e-05
WBGene00000238	-0.0747261	0.306799	0.00753815	0.88702
WBGene00000239	-0.167932	0.0242965	-0.126862	0.0181587
WBGene00000240	-0.371898	2.30525e-06	-0.11362	0.069148
WBGene00000245	-0.107431	0.189854	-0.0728519	0.216107
WBGene00000247	-0.0588121	0.407146	-0.00919002	0.857598
WBGene00000248	0.00583448	0.935602	-0.0440796	0.396086
WBGene00000249	0.218502	0.00285499	0.113272	0.0344793
WBGene00000250	0.127122	0.0710199	0.137299	0.00644062
WBGene00000253	-0.187366	0.0094668	-0.140985	0.00667312
WBGene00000254	0.00351853	0.962096	-0.0353174	0.507077
WBGene00000257	-0.0381336	0.594517	-0.104776	0.0416565
WBGene00000259	0.0706757	0.324722	0.0398519	0.443326
WBGene00000262	-0.0560347	0.438059	-0.0620853	0.231766
WBGene00000263	-0.266598	0.00148825	-0.163946	0.00711045
WBGene00000264	0.0171638	0.807237	0.101714	0.04499
WBGene00000265	0.0988392	0.200056	0.0367504	0.510216
WBGene00000266	-0.32747	4.23556e-06	-0.190195	0.000327821
WBGene00000268	-0.0242171	0.7529	0.0538348	0.331891
WBGene00000269	-0.102984	0.151084	-0.0620121	0.230286
WBGene00000270	0.0261006	0.725732	0.050365	0.345673
WBGene00000271	0.0589515	0.454008	0.118756	0.0350671
WBGene00000273	-0.373801	8.56786e-07	-0.242805	1.66e-05
WBGene00000274	0.0171787	0.813684	-0.0325244	0.535544
WBGene00000275	0.0256106	0.737384	-0.0195747	0.723517
WBGene00000276	-0.0329024	0.649934	-0.0278864	0.594709
WBGene00000277	-0.295694	2.27766e-05	-0.177672	0.000646343
WBGene00000281	-0.0388212	0.592724	0.0268965	0.607616
WBGene00000282	-0.146886	0.0386969	-0.103628	0.0428635
WBGene00000283	-0.116069	0.125758	-0.0147656	0.791089
WBGene00000289	0.109214	0.152073	0.0152805	0.783456
WBGene00000292	0.0870135	0.213247	0.0972514	0.0521253
WBGene00000293	0.0277879	0.694808	-0.00908522	0.858577
WBGene00000294	-0.0244306	0.734727	-0.104283	0.0452116
WBGene00000298	-0.0835349	0.336512	-0.0531999	0.39431
WBGene00000301	-0.23401	0.000771986	-0.270803	2.94e-08
WBGene00000366	-0.21688	0.0173016	-0.193324	0.0030539
WBGene00000367	-0.116606	0.0969674	-0.0696913	0.174588
WBGene00000368	-0.0757888	0.288436	0.0444724	0.394971
WBGene00000369	0.256346	0.00107644	0.148532	0.00963957
WBGene00000370	-0.201795	0.00485835	-0.0567556	0.295265
WBGene00000371	-0.0454236	0.539557	-0.0548242	0.301898
WBGene00000373	-0.100585	0.175355	-0.0687991	0.198105
WBGene00000375	0.185941	0.0120723	0.122585	0.0238944
WBGene00000376	0.178002	0.0360808	0.0851991	0.166482
WBGene00000377	0.271507	0.000499997	0.189526	0.000921675
WBGene00000378	0.443543	3.64612e-09	0.261921	5.58e-06
WBGene00000379	0.167849	0.0333687	0.111584	0.0537926
WBGene00000380	0.29704	6.57982e-05	0.105799	0.0674909
WBGene00000381	0.37845	2.44805e-07	0.209024	0.000187368
WBGene00000382	0.116673	0.106138	0.0212409	0.692267
WBGene00000383	-0.0543568	0.471939	-0.0343049	0.532016
WBGene00000386	0.146921	0.0720481	0.197176	0.000668438
WBGene00000387	-0.00258313	0.971231	-0.0663019	0.199368
WBGene00000388	0.32232	2.55095e-06	0.152808	0.00366174
WBGene00000390	0.0953483	0.255393	0.0801473	0.182332
WBGene00000393	0.0435057	0.544085	-0.00273105	0.95794
WBGene00000395	-0.196973	0.00711072	-0.155517	0.00307191
WBGene00000396	-0.0270801	0.720919	-0.127224	0.0198445
WBGene00000403	-0.255589	0.000186255	-0.148535	0.00340881
WBGene00000405	0.238963	0.000745371	0.0903406	0.0883829
WBGene00000406	0.0328908	0.64021	-0.111116	0.0323861
WBGene00000408	0.157138	0.0295244	0.0729887	0.164759
WBGene00000409	0.173987	0.0257129	0.0729689	0.199343
WBGene00000410	0.121649	0.104093	0.0605608	0.266277
WBGene00000411	-0.183002	0.0103649	-0.119197	0.0210044
WBGene00000413	-0.0765508	0.293057	-0.00669923	0.899037
WBGene00000414	-0.128386	0.0703639	-0.119283	0.018932
WBGene00000415	-0.0439226	0.574245	-0.0509136	0.364896
WBGene00000416	0.228856	0.00141254	0.126484	0.0158642
WBGene00000417	0.0219087	0.762326	0.0510627	0.326383
WBGene00000418	-0.0354082	0.620833	-0.0154651	0.769143
WBGene00000419	0.14697	0.0827248	0.0918352	0.13334
WBGene00000420	-0.00149265	0.983002	0.0127395	0.800764
WBGene00000421	-0.289526	0.000811042	-0.109884	0.0863255
WBGene00000422	0.0287354	0.685287	-0.0571686	0.266594
WBGene00000423	0.28175	3.44186e-05	0.223495	4.68e-06
WBGene00000424	-0.01045	0.883965	0.00561741	0.913057
WBGene00000425	-0.235775	0.000615257	-0.215521	1.13e-05
WBGene00000426	0.273314	0.00021161	0.137905	0.0121221
WBGene00000437	-0.144629	0.0409662	-0.212018	2.5e-05
WBGene00000441	-0.306269	7.81107e-06	-0.141089	0.00739344
WBGene00000443	-0.184714	0.00812517	-0.200586	5.15e-05
WBGene00000444	0.288526	2.59708e-05	0.0498453	0.359633
WBGene00000448	-0.198453	0.00448622	-0.176297	0.000411188
WBGene00000449	-0.242506	0.000447335	-0.250918	2.65e-07
WBGene00000453	-0.248183	0.000314427	-0.252345	2.06e-07
WBGene00000457	-0.132588	0.0584164	-0.206867	3.2e-05
WBGene00000458	-0.174409	0.0136628	-0.186293	0.000212041
WBGene00000459	0.054484	0.496824	0.0251313	0.663213
WBGene00000460	0.235725	0.000786606	0.0272821	0.613417
WBGene00000461	0.0469171	0.506713	-0.103873	0.0465541
WBGene00000462	0.145617	0.038243	0.0241598	0.643562
WBGene00000463	-0.299825	2.16722e-05	-0.270882	6.23e-08
WBGene00000464	0.0469922	0.527587	0.0166037	0.757251
WBGene00000465	0.181009	0.0114511	0.154509	0.00281985
WBGene00000466	0.0884457	0.233008	0.0692601	0.193493
WBGene00000467	0.0868795	0.244665	0.0900472	0.0948647
WBGene00000469	-0.278673	4.22424e-05	-0.241707	6.08e-07
WBGene00000472	-0.0552122	0.488222	-0.0847893	0.136895
WBGene00000473	0.421108	4.2591e-08	0.247625	2.01e-05
WBGene00000474	0.273417	0.000161748	0.139745	0.00953191
WBGene00000475	-0.235044	0.0019973	-0.12997	0.0192986
WBGene00000478	-0.229359	0.00102881	-0.26188	9.66e-08
WBGene00000479	0.0646422	0.425258	0.0858478	0.139173
WBGene00000480	0.0313149	0.657263	-0.0557028	0.276866
WBGene00000482	-0.226194	0.00119693	-0.249854	3.72e-07
WBGene00000496	0.00107858	0.989176	0.150491	0.0078951
WBGene00000497	0.0254401	0.722785	0.074502	0.14903
WBGene00000498	0.231287	0.000853206	0.067974	0.195076
WBGene00000499	0.0399473	0.583243	0.0325447	0.536511
WBGene00000500	0.106509	0.14928	0.0068714	0.898614
WBGene00000502	0.0971855	0.204049	0.0435865	0.431827
WBGene00000503	-0.240853	0.000470245	-0.257866	1.05e-07
WBGene00000506	0.150981	0.0316682	0.0882302	0.0833542
WBGene00000507	0.119005	0.100598	0.110478	0.0334612
WBGene00000508	0.0975526	0.195489	0.0370972	0.495271
WBGene00000509	0.0813834	0.26115	0.00164806	0.974973
WBGene00000511	-0.116359	0.0933635	-0.0785305	0.116426
WBGene00000512	0.261455	0.000232714	0.134945	0.0107981
WBGene00000514	-0.0727601	0.318203	-0.104124	0.0484213
WBGene00000515	-0.188558	0.013942	-0.0988453	0.0829374
WBGene00000516	-0.163661	0.0189836	-0.182141	0.000243786
WBGene00000517	0.104565	0.149125	0.0757856	0.145945
WBGene00000519	0.0121578	0.864322	0.0711504	0.170145
WBGene00000520	-0.122576	0.105176	-0.0336384	0.540147
WBGene00000522	0.176865	0.0869179	0.0675412	0.364007
WBGene00000527	-0.267165	0.000117713	-0.125677	0.0159843
WBGene00000528	-0.331165	2.0162e-06	-0.238337	2.57e-06
WBGene00000530	-0.0672448	0.388203	-0.0452554	0.418884
WBGene00000532	-0.0173372	0.823315	0.0298693	0.592869
WBGene00000533	0.204831	0.00716355	0.106539	0.054824
WBGene00000534	0.0255077	0.74094	0.00675871	0.902902
WBGene00000535	-0.191861	0.00583107	-0.17024	0.000623292
WBGene00000536	-0.0361532	0.623308	-0.0683694	0.198781
WBGene00000537	0.042896	0.559563	0.0599467	0.258091
WBGene00000539	-0.122965	0.0932888	-0.0425398	0.426823
WBGene00000540	0.0324076	0.659285	0.00734665	0.889415
WBGene00000542	-0.138265	0.07133	-0.0814488	0.148368
WBGene00000543	-0.0170812	0.831733	0.08181	0.156736
WBGene00000545	-0.240641	0.000488323	-0.117432	0.0215494
WBGene00000547	0.0013921	0.984577	-0.0115133	0.823964
WBGene00000548	-0.0266312	0.747661	0.0538485	0.36434
WBGene00000549	0.0701268	0.370535	-0.0327627	0.564251
WBGene00000550	0.182708	0.0217222	0.139923	0.0141936
WBGene00000552	-0.0081074	0.909548	0.0200258	0.69662
WBGene00000554	-0.0176359	0.820415	-0.0493323	0.376249
WBGene00000556	-0.207914	0.00260495	-0.211792	1.54e-05
WBGene00000557	-0.193077	0.00865045	-0.116564	0.0290278
WBGene00000558	-0.0827833	0.234781	-0.0968789	0.0528448
WBGene00000564	0.0704406	0.327487	0.0727508	0.158586
WBGene00000565	0.00581205	0.938446	0.00946036	0.861045
WBGene00000566	-0.0950197	0.173868	-0.111836	0.0253311
WBGene00000567	0.00992091	0.901164	0.0116191	0.839434
WBGene00000585	0.0444879	0.567361	0.128843	0.0209796
WBGene00000591	0.0941677	0.217751	-0.0248136	0.656144
WBGene00000592	0.207248	0.00385349	0.151592	0.004086
WBGene00000597	-0.637781	4.56544e-19	-0.401835	4.13e-11
WBGene00000609	-0.683281	4.23373e-26	-0.433766	4.28e-14
WBGene00000615	-0.0984702	0.171137	-0.107839	0.0362981
WBGene00000620	-0.392156	7.36494e-08	-0.30876	1.26e-08
WBGene00000652	-0.150297	0.0312932	-0.190625	0.000120489
WBGene00000657	-0.181883	0.00916246	-0.0989482	0.0533982
WBGene00000670	0.0867694	0.234197	-0.0206368	0.698286
WBGene00000671	-0.409293	1.07122e-09	-0.249465	9.96e-07
WBGene00000673	-0.581545	1.7752e-18	-0.386577	1.71e-12
WBGene00000674	-0.307826	5.7181e-06	-0.242653	6.45e-07
WBGene00000677	-0.567283	9.24267e-17	-0.365422	1.17e-10
WBGene00000680	-0.434362	5.76566e-09	-0.248651	1.59e-05
WBGene00000692	-0.303977	5.07245e-05	-0.132879	0.0187149
WBGene00000695	-0.202852	0.00321996	-0.208795	1.89e-05
WBGene00000703	-0.212247	0.00233611	-0.12797	0.0121049
WBGene00000708	-0.23375	0.00423156	-0.0518335	0.395743
WBGene00000712	-0.221959	0.0012424	-0.12028	0.0177861
WBGene00000713	-0.622128	5.58672e-12	-0.385663	4.24e-12
WBGene00000715	-0.477323	6.42799e-13	-0.308738	1.22e-09
WBGene00000716	-0.377621	3.81845e-07	-0.235966	2.5e-05
WBGene00000723	-0.33854	8.24213e-07	-0.190753	0.000245227
WBGene00000728	-0.241635	0.000944993	-0.184526	0.000444825
WBGene00000731	0.0288243	0.696417	-0.00446699	0.934092
WBGene00000732	-0.48559	1.01678e-12	-0.312998	2.5e-09
WBGene00000733	-0.578825	7.81086e-16	-0.354823	7.74e-10
WBGene00000738	-0.0379615	0.58883	0.0113451	0.82363
WBGene00000739	-0.202432	0.00413508	-0.152249	0.00274532
WBGene00000751	-0.653639	4.60312e-14	-0.393486	2.03e-08
WBGene00000752	-0.635202	1.71387e-18	-0.354661	2.47e-08
WBGene00000754	-0.532756	1.03054e-09	-0.31606	5.42e-06
WBGene00000756	-0.209429	0.00243946	-0.156061	0.00175045
WBGene00000757	-0.560294	8.12105e-11	-0.322848	2.76e-06
WBGene00000761	0.00264307	0.970734	0.0489726	0.34415
WBGene00000762	-0.054622	0.458533	-0.0428729	0.418825
WBGene00000763	-0.0625703	0.388869	-0.000416267	0.993669
WBGene00000764	0.195099	0.00578681	0.0718345	0.176458
WBGene00000765	0.185185	0.00795127	0.195106	8.52e-05
WBGene00000766	0.0447993	0.539741	0.0576147	0.27192
WBGene00000767	0.25884	0.000246022	0.134032	0.0108802
WBGene00000768	-0.337797	1.87671e-06	-0.249936	1.1e-06
WBGene00000770	0.111556	0.138661	0.0479324	0.379768
WBGene00000772	0.19694	0.0263007	0.123139	0.0542008
WBGene00000773	0.0342864	0.626814	0.124112	0.0152766
WBGene00000774	0.223277	0.00145311	0.0842681	0.111512
WBGene00000776	-0.304368	0.000586453	-0.146408	0.0271071
WBGene00000777	0.0308781	0.685391	0.0659961	0.227969
WBGene00000778	-0.110708	0.120316	-0.103567	0.0426506
WBGene00000779	-0.589426	3.91252e-11	-0.327275	3.19e-06
WBGene00000780	-0.189905	0.010675	-0.103684	0.0599504
WBGene00000781	0.195463	0.00924508	0.170179	0.00194066
WBGene00000783	-0.0403065	0.672495	-0.0313602	0.648072
WBGene00000784	-0.327294	3.14676e-05	-0.0925069	0.129901
WBGene00000785	0.391508	0.000147575	0.188915	0.0136621
WBGene00000786	-0.0568575	0.576055	0.0140962	0.848498
WBGene00000787	0.0570452	0.422088	0.0112427	0.82697
WBGene00000788	-0.275218	0.00340261	-0.0959208	0.170871
WBGene00000789	-0.187819	0.00822046	-0.14435	0.00545979
WBGene00000792	-0.236121	0.000619531	-0.21308	1.44e-05
WBGene00000793	0.0724988	0.355008	0.00364846	0.948852
WBGene00000794	0.0862772	0.221172	0.0419127	0.409994
WBGene00000795	0.105434	0.135563	0.0955738	0.0592963
WBGene00000796	-0.117731	0.125193	0.000519013	0.99261
WBGene00000797	0.11651	0.0958838	0.0787945	0.129444
WBGene00000798	0.074898	0.300021	-0.0303728	0.563654
WBGene00000799	-0.239825	0.000541415	-0.185057	0.000214835
WBGene00000800	0.0471185	0.504125	0.0903411	0.0743929
WBGene00000802	0.0214308	0.768616	-0.0405237	0.439945
WBGene00000803	0.218827	0.00353387	0.146988	0.00677621
WBGene00000804	0.23864	0.00321201	0.113181	0.0598983
WBGene00000812	-0.113328	0.116069	-0.0362968	0.487558
WBGene00000813	-0.103992	0.259884	0.00889357	0.893918
WBGene00000814	-0.0509521	0.497347	-0.0210883	0.696373
WBGene00000815	0.0525777	0.45756	0.025113	0.622271
WBGene00000816	0.103858	0.209657	0.050056	0.400164
WBGene00000817	0.0721651	0.332915	0.0568346	0.29406
WBGene00000818	0.171143	0.0137617	0.115853	0.0212073
WBGene00000822	-0.441206	2.46408e-06	-0.233069	0.000915227
WBGene00000829	-0.173485	0.0142101	-0.075599	0.145209
WBGene00000831	-0.268175	0.00012029	-0.0827489	0.120309
WBGene00000832	0.0862258	0.222631	-0.0502957	0.334069
WBGene00000833	-0.159458	0.0328159	-0.132171	0.0135844
WBGene00000834	-0.124014	0.117685	-0.113416	0.045819
WBGene00000835	0.145173	0.0481636	0.134387	0.0119618
WBGene00000836	-0.0332445	0.642758	-0.0910773	0.0774097
WBGene00000837	-0.0194099	0.799099	0.0463098	0.399201
WBGene00000838	0.0683926	0.380348	0.0551068	0.326142
WBGene00000839	-0.164896	0.0305597	-0.0312473	0.576506
WBGene00000840	0.129445	0.0800665	0.0921544	0.083121
WBGene00000843	0.216113	0.00280055	0.0940443	0.0777563
WBGene00000845	-0.108691	0.119405	-0.0179662	0.723709
WBGene00000846	0.12615	0.120059	0.0889269	0.126524
WBGene00000854	0.0822915	0.239327	0.0539227	0.283994
WBGene00000857	-0.090076	0.201444	-0.113209	0.0250173
WBGene00000858	-0.214678	0.00189638	-0.223879	4.76e-06
WBGene00000863	-0.0327468	0.672821	-0.0953034	0.0869513
WBGene00000865	0.17531	0.0128897	0.0455257	0.383154
WBGene00000866	0.335497	1.42458e-06	0.257995	6.79e-07
WBGene00000867	0.264114	0.000285074	0.216457	3.96e-05
WBGene00000868	0.228666	0.00242903	0.0316306	0.580013
WBGene00000869	-0.0791437	0.321372	-0.0540919	0.345308
WBGene00000870	-0.145601	0.0367859	-0.147238	0.00315854
WBGene00000871	0.0630034	0.392118	0.0912632	0.0832744
WBGene00000872	-0.047476	0.544327	-0.0195396	0.728411
WBGene00000874	0.334011	7.77629e-05	0.136651	0.0317116
WBGene00000875	0.0586605	0.423426	0.0131808	0.802928
WBGene00000876	0.296049	8.45033e-05	0.193056	0.000459308
WBGene00000877	0.156887	0.0369967	0.0847118	0.119904
WBGene00000879	0.00257361	0.979424	-0.052964	0.456837
WBGene00000880	-0.153992	0.0329468	-8.76e-05	0.998707
WBGene00000881	-0.173399	0.052123	-0.228883	0.000309826
WBGene00000882	-0.257971	0.000356896	-0.280162	3.31e-08
WBGene00000883	0.198212	0.0361775	0.0811883	0.23561
WBGene00000884	0.0543841	0.44177	-0.0879701	0.0893549
WBGene00000885	0.251207	0.000337639	0.11465	0.0277752
WBGene00000886	0.0932875	0.184994	0.104046	0.0430184
WBGene00000887	0.154588	0.0419349	0.132654	0.0149219
WBGene00000888	0.184331	0.00773707	0.0598038	0.244831
WBGene00000889	0.245408	0.000617532	0.0441784	0.42349
WBGene00000890	0.170183	0.0145966	0.0390631	0.456144
WBGene00000891	-0.0571272	0.421166	-0.0336049	0.510796
WBGene00000892	0.012092	0.867273	-0.00456663	0.93
WBGene00000894	0.150927	0.0459847	0.149619	0.005634
WBGene00000896	0.106452	0.135312	0.0755861	0.141466
WBGene00000897	0.198735	0.00436184	0.0720501	0.162213
WBGene00000898	-0.165832	0.0499367	-0.087075	0.154283
WBGene00000899	-0.206162	0.00337505	-0.188595	0.000171735
WBGene00000900	0.170148	0.0232627	0.0747049	0.173669
WBGene00000901	-0.0534601	0.523	-0.00321972	0.957295
WBGene00000904	-0.145903	0.0432381	-0.119478	0.0228077
WBGene00000908	-0.151288	0.0355543	-0.0651828	0.214023
WBGene00000910	-0.0836066	0.245395	-0.0906752	0.0792754
WBGene00000911	0.0501095	0.525464	0.00675954	0.905361
WBGene00000912	-0.0560475	0.506946	-0.0052968	0.930441
WBGene00000913	0.0353962	0.658047	0.110067	0.0524013
WBGene00000914	0.0270895	0.704508	-0.0265382	0.607478
WBGene00000915	0.272042	0.000379678	0.119357	0.0365073
WBGene00000917	0.219179	0.00213471	0.113812	0.0295415
WBGene00000920	-0.201974	0.00378566	-0.111275	0.0290041
WBGene00000923	0.20494	0.00447075	0.0927193	0.0803844
WBGene00000928	-0.197603	0.00415457	-0.224231	4.14e-06
WBGene00000929	-0.329771	0.00031829	-0.280639	1.94e-05
WBGene00000931	0.0906245	0.24588	0.0253486	0.653098
WBGene00000933	0.152502	0.0283075	0.14534	0.00369289
WBGene00000935	0.0698815	0.377152	0.061638	0.277499
WBGene00000937	-0.0104483	0.88141	0.0450545	0.374235
WBGene00000938	-0.13347	0.0839568	-0.122411	0.027272
WBGene00000939	-0.0871081	0.289453	-0.00221435	0.970185
WBGene00000940	0.0465825	0.515996	0.0659121	0.200728
WBGene00000941	0.250556	0.000844899	0.0581983	0.306004
WBGene00000942	-0.408477	7.23945e-09	-0.28006	8.49e-08
WBGene00000959	-0.15194	0.0288219	-0.144713	0.00360443
WBGene00000961	-0.150003	0.035223	-0.188246	0.000198153
WBGene00000962	-0.30706	0.000248717	-0.150435	0.015162
WBGene00000963	-0.0887308	0.244472	-0.0347166	0.527496
WBGene00000964	-0.0790011	0.257166	-0.0931696	0.0624094
WBGene00000965	0.246729	0.000577689	0.162675	0.0017813
WBGene00000966	-0.268716	9.71948e-05	-0.20354	4.26e-05
WBGene00000967	-0.329849	2.2305e-06	-0.170354	0.00122772
WBGene00000969	-0.107719	0.153294	-0.16746	0.00184923
WBGene00000970	0.0530167	0.471586	0.00591895	0.911351
WBGene00000973	-0.0942137	0.200008	-0.119893	0.022605
WBGene00000974	-0.0631405	0.405708	-0.0211995	0.698323
WBGene00000975	0.102537	0.175921	0.0873537	0.111658
WBGene00000976	-0.0182029	0.806542	0.0692319	0.198172
WBGene00000977	-0.0728695	0.355902	-0.085114	0.13656
WBGene00000980	0.204879	0.00423286	0.153306	0.00354018
WBGene00000981	-0.243562	0.000687566	-0.0880529	0.101877
WBGene00000982	-0.31966	1.16413e-05	-0.21592	5.49e-05
WBGene00000983	-0.21785	0.00150783	-0.168011	0.000663686
WBGene00000984	-0.286013	4.40503e-05	-0.166708	0.00126777
WBGene00000985	0.293864	2.27258e-05	0.182144	0.000468425
WBGene00000987	0.13593	0.061155	0.109488	0.0356219
WBGene00000988	-0.13935	0.230954	0.0648309	0.452627
WBGene00000989	-0.208959	0.00243176	-0.144992	0.00363556
WBGene00000990	-0.0457483	0.520266	-0.0953683	0.0616753
WBGene00000991	-0.312841	9.14338e-06	-0.110122	0.0432272
WBGene00000993	-0.244489	0.000857834	-0.130015	0.0162224
WBGene00000994	0.118191	0.129397	0.0790676	0.157308
WBGene00000995	-0.00329504	0.963019	-0.101108	0.0490075
WBGene00000996	0.0494288	0.520934	-0.023436	0.673186
WBGene00000998	-0.40993	8.17136e-10	-0.202391	0.000177795
WBGene00001000	-0.583376	3.32752e-14	-0.379442	2.51e-10
WBGene00001001	0.101426	0.19312	0.0434321	0.447049
WBGene00001002	0.0870507	0.235025	0.00618963	0.907334
WBGene00001005	0.165307	0.0185981	0.124312	0.0140088
WBGene00001006	-0.177256	0.0140221	-0.173643	0.000769841
WBGene00001007	0.138623	0.0606004	0.103541	0.0512766
WBGene00001008	-0.2225	0.00499073	-0.165053	0.00449908
WBGene00001016	0.102265	0.163839	0.0589705	0.267292
WBGene00001017	-0.226981	0.00320529	-0.144587	0.00953454
WBGene00001018	0.0962328	0.169194	0.0786758	0.124739
WBGene00001019	0.184475	0.0172423	0.0817342	0.148235
WBGene00001020	0.0414121	0.560702	0.0255685	0.618286
WBGene00001021	0.131268	0.0615751	0.0774575	0.12791
WBGene00001022	0.0851666	0.272271	0.0471715	0.397902
WBGene00001023	0.0511097	0.562911	0.0349376	0.586159
WBGene00001025	-0.152122	0.0290491	-0.127525	0.0113661
WBGene00001026	0.00781726	0.917352	0.0598189	0.269013
WBGene00001027	0.352199	1.97639e-06	0.167344	0.00339632
WBGene00001028	0.195117	0.0067945	0.113004	0.031254
WBGene00001029	0.116525	0.225721	0.0878116	0.204143
WBGene00001030	0.172185	0.0316412	0.0816476	0.161746
WBGene00001031	0.251589	0.00230876	0.143217	0.0180133
WBGene00001032	0.0129166	0.857172	-0.102608	0.0486171
WBGene00001033	0.0343365	0.624562	0.0388984	0.441809
WBGene00001034	-0.0821991	0.253594	0.0098211	0.851008
WBGene00001035	0.0910417	0.215814	0.0687439	0.193736
WBGene00001036	0.0572981	0.446095	0.0662636	0.220359
WBGene00001037	0.150124	0.0705524	0.0743846	0.217582
WBGene00001038	-0.194576	0.00513365	-0.0866269	0.0905026
WBGene00001039	0.124156	0.0949927	0.0666638	0.214659
WBGene00001040	-0.0361276	0.672882	0.0290614	0.637087
WBGene00001041	0.0354553	0.622638	0.0282364	0.585505
WBGene00001042	-0.24465	0.000828326	-0.102308	0.0608949
WBGene00001043	0.141813	0.058312	0.0382056	0.484138
WBGene00001044	0.0696233	0.334232	0.0819448	0.11297
WBGene00001045	-0.0954339	0.176747	-0.1807	0.000344036
WBGene00001046	0.28498	0.000104742	0.155612	0.00421059
WBGene00001047	-0.010824	0.88759	-0.0103425	0.851256
WBGene00001048	-0.000193043	0.997836	-0.0153596	0.763918
WBGene00001049	-0.0132292	0.856253	0.0254854	0.630815
WBGene00001050	0.240098	0.000788594	0.112954	0.0344374
WBGene00001051	0.143611	0.0624133	0.0736519	0.18763
WBGene00001055	-0.297486	2.40968e-05	-0.169518	0.00129122
WBGene00001056	0.0754855	0.33257	0.107497	0.0524587
WBGene00001057	-0.034081	0.633135	0.0305583	0.557068
WBGene00001058	0.134854	0.0625769	0.0977812	0.0604984
WBGene00001059	-0.0323038	0.650824	-0.0197348	0.70103
WBGene00001060	0.0582544	0.421158	0.0769136	0.138594
WBGene00001064	-0.208191	0.00248022	-0.213579	1.18e-05
WBGene00001065	-0.220895	0.00129432	-0.213056	1.23e-05
WBGene00001069	-0.190714	0.00567413	-0.19949	4.55e-05
WBGene00001072	-0.164822	0.0176893	-0.166947	0.000750563
WBGene00001073	-0.171969	0.0217909	-0.169309	0.00153372
WBGene00001075	-0.208286	0.00245015	-0.214799	1.03e-05
WBGene00001076	-0.210814	0.00218031	-0.213399	1.21e-05
WBGene00001077	-0.109538	0.11872	-0.215642	1.66e-05
WBGene00001078	-0.00769002	0.913521	-0.0682565	0.180841
WBGene00001080	-0.0210588	0.780124	-0.122268	0.0250998
WBGene00001081	-0.0704751	0.379243	-0.1275	0.0260777
WBGene00001082	0.0323609	0.644493	-0.0434011	0.392483
WBGene00001085	-0.192157	0.00976809	-0.123886	0.0212378
WBGene00001086	-0.0937378	0.187718	-0.170739	0.000768338
WBGene00001087	-0.0145302	0.855094	-0.0644087	0.260585
WBGene00001088	0.334741	1.6986e-06	0.0982169	0.0766828
WBGene00001089	-0.211159	0.00222351	-0.17909	0.000286606
WBGene00001090	0.122806	0.118831	0.173626	0.00186803
WBGene00001092	0.126892	0.0756055	0.098273	0.0557141
WBGene00001093	0.223422	0.0059245	0.0885839	0.140035
WBGene00001094	0.0512278	0.497059	0.0276472	0.610648
WBGene00001095	-0.110501	0.125851	0.00603813	0.908946
WBGene00001099	-0.224919	0.00540944	-0.0493291	0.414016
WBGene00001101	-0.0687517	0.340164	-0.084932	0.100466
WBGene00001102	0.0722216	0.326294	-0.0601905	0.263053
WBGene00001103	-0.0636229	0.373397	-0.169492	0.000940259
WBGene00001104	-0.0113227	0.874124	-0.178263	0.00060103
WBGene00001105	-0.24042	0.00044285	-0.235901	1.13e-06
WBGene00001108	-0.171815	0.0128623	-0.187023	0.000138174
WBGene00001110	-0.0049264	0.94971	0.0377053	0.501443
WBGene00001112	0.062334	0.404914	0.0604105	0.260452
WBGene00001113	-0.251337	0.000420206	-0.104936	0.0486402
WBGene00001115	-0.0778746	0.268244	-0.10128	0.0445497
WBGene00001119	-0.109645	0.116325	-0.00542483	0.915316
WBGene00001123	-0.259356	0.000149215	-0.191693	0.000104014
WBGene00001130	0.0370375	0.630429	0.0912261	0.099196
WBGene00001131	-0.108718	0.118324	-0.179523	0.000291593
WBGene00001132	-0.348137	7.22208e-07	-0.223672	1.79e-05
WBGene00001134	-0.0906699	0.24774	0.039958	0.483865
WBGene00001137	-0.084083	0.254957	-0.0317952	0.550478
WBGene00001148	0.19308	0.00776662	0.0229461	0.672785
WBGene00001149	-0.154072	0.0295999	-0.00953433	0.856584
WBGene00001151	0.117889	0.103253	0.02166	0.682797
WBGene00001153	-0.0566187	0.459551	0.0017296	0.975006
WBGene00001154	-0.0837182	0.254091	-0.0554855	0.292907
WBGene00001155	-0.59471	1.29065e-09	-0.302574	0.000146315
WBGene00001156	-0.0566806	0.441531	-0.00127425	0.980941
WBGene00001157	-0.229011	0.000852975	-0.0634373	0.220788
WBGene00001161	0.344537	7.45474e-07	0.170196	0.00134614
WBGene00001162	0.188058	0.0101189	0.138611	0.00851533
WBGene00001163	-0.288245	2.47422e-05	-0.20703	3.18e-05
WBGene00001165	-0.194625	0.00566642	-0.217149	1.33e-05
WBGene00001166	-0.0172978	0.834606	-0.0431934	0.468468
WBGene00001167	-0.0276803	0.71326	-0.0381852	0.47992
WBGene00001168	0.0664589	0.409725	-0.00191064	0.973775
WBGene00001169	-0.327029	2.56028e-06	-0.309557	2.17e-10
WBGene00001172	-0.216076	0.00208969	-0.105516	0.0471098
WBGene00001173	-0.0274274	0.73271	0.00136905	0.981199
WBGene00001175	0.175969	0.0147674	0.0593031	0.263152
WBGene00001177	-0.302126	1.20018e-05	-0.250831	4.4e-07
WBGene00001178	0.00618483	0.93045	0.0146994	0.773562
WBGene00001179	-0.207477	0.00477691	-0.147465	0.00569205
WBGene00001182	-0.113415	0.107142	0.0549225	0.295922
WBGene00001184	-0.0890355	0.20482	0.00297104	0.953676
WBGene00001186	-0.0118749	0.871454	-0.10194	0.0538439
WBGene00001187	-0.165547	0.0184361	-0.0779032	0.128153
WBGene00001189	-0.220043	0.00227889	-0.0915151	0.0899484
WBGene00001193	0.335359	3.53584e-06	0.123516	0.0291369
WBGene00001194	-0.0440316	0.558473	-0.00240632	0.964561
WBGene00001196	-0.308965	0.000226202	-0.211003	0.000492201
WBGene00001208	-0.254696	0.000482875	-0.0973878	0.0746532
WBGene00001209	0.173098	0.038038	0.0916534	0.129134
WBGene00001210	-0.196031	0.00441825	-0.202909	3.28e-05
WBGene00001214	0.0490412	0.541671	0.100401	0.0785959
WBGene00001215	-0.0219264	0.79436	-0.0204627	0.736563
WBGene00001224	-0.0104736	0.891059	0.0278338	0.612688
WBGene00001225	0.210694	0.00406341	0.0698329	0.199526
WBGene00001226	0.069424	0.400887	0.096167	0.102325
WBGene00001227	0.00543828	0.94341	0.00211843	0.969299
WBGene00001228	0.248087	0.000860786	0.0542851	0.336335
WBGene00001229	0.213364	0.00249873	0.0431324	0.418605
WBGene00001230	0.228138	0.00336147	0.132934	0.0185534
WBGene00001231	0.235587	0.00530574	0.0969835	0.11757
WBGene00001232	0.243098	0.0102811	0.0368214	0.599047
WBGene00001233	0.177215	0.0174425	0.132291	0.0140394
WBGene00001234	0.0876461	0.22741	-0.0145849	0.782733
WBGene00001235	0.248366	0.000344966	0.122144	0.0176407
WBGene00001236	-0.122406	0.156727	-0.135219	0.0292692
WBGene00001239	0.0341963	0.666732	0.0301819	0.596496
WBGene00001240	-0.0676121	0.391254	0.0543995	0.343979
WBGene00001241	-0.0815258	0.269693	0.129734	0.0182311
WBGene00001243	-0.166708	0.0171717	-0.0140616	0.788587
WBGene00001244	-0.257818	0.000199513	-0.0919354	0.0792117
WBGene00001247	-0.156537	0.061461	-0.0477667	0.437446
WBGene00001248	-0.102495	0.144291	-0.102756	0.0412594
WBGene00001249	-0.128689	0.0661415	-0.205588	3.57e-05
WBGene00001250	-0.196021	0.00506996	-0.150559	0.00278231
WBGene00001251	-0.328005	1.43606e-06	-0.227057	5.97e-06
WBGene00001253	-0.027576	0.695929	-0.0600979	0.235702
WBGene00001258	-0.0932741	0.271897	-0.0684147	0.261316
WBGene00001259	-0.167721	0.174509	-0.116588	0.184533
WBGene00001262	-0.0823407	0.264241	-0.0696027	0.189144
WBGene00001263	-0.471694	1.48306e-12	-0.317642	1.76e-09
WBGene00001281	0.160099	0.0349926	0.130624	0.0170862
WBGene00001284	-0.0431586	0.576683	0.0676232	0.22574
WBGene00001303	0.162499	0.033373	0.0813121	0.142763
WBGene00001309	0.279436	8.14912e-05	0.151069	0.00400023
WBGene00001320	-0.0953206	0.19766	-0.0431762	0.418488
WBGene00001324	0.0816371	0.252373	0.0368751	0.473952
WBGene00001325	0.137182	0.0600727	0.021498	0.692142
WBGene00001328	-0.267033	0.000122456	-0.253448	2.7e-07
WBGene00001329	0.142446	0.0591687	0.00826874	0.881878
WBGene00001330	-0.286963	7.28931e-05	-0.144776	0.00744196
WBGene00001331	-0.0776964	0.272712	-0.125874	0.0129915
WBGene00001332	0.0451175	0.53046	0.117665	0.0225594
WBGene00001333	-0.0502414	0.529232	-0.00643477	0.910851
WBGene00001334	-0.25326	0.000682999	-0.114455	0.0382336
WBGene00001335	0.0304354	0.668497	0.0138634	0.786118
WBGene00001336	0.0770121	0.325042	0.0520734	0.355539
WBGene00001337	-0.035316	0.653066	-0.0204247	0.717081
WBGene00001338	-0.0813517	0.260863	0.00167595	0.974539
WBGene00001340	-0.0489594	0.494478	-0.0593574	0.249307
WBGene00001345	-0.195003	0.00864775	-0.0463407	0.404801
WBGene00001352	-0.0942816	0.229606	-0.0156303	0.78294
WBGene00001358	0.133069	0.0550046	0.0694162	0.169016
WBGene00001365	-0.0079204	0.922445	-0.0204324	0.726431
WBGene00001366	-0.245148	0.000364765	-0.181656	0.000252587
WBGene00001368	-0.168897	0.0160496	-0.129821	0.0104087
WBGene00001371	-0.0824995	0.249115	-0.01339	0.797185
WBGene00001372	0.235376	0.000684485	0.14424	0.0050784
WBGene00001377	-0.156195	0.0242359	-0.225644	4.28e-06
WBGene00001385	-0.490185	1.16823e-06	-0.303919	1.61e-08
WBGene00001386	-0.424541	1.64634e-05	-0.283443	8.29e-08
WBGene00001387	-0.183242	0.00810992	-0.169871	0.000592132
WBGene00001389	-0.151532	0.029386	-0.0822794	0.103812
WBGene00001390	-0.171771	0.01579	-0.0760983	0.149693
WBGene00001392	-0.266472	0.00073702	-0.148661	0.0102665
WBGene00001393	0.133451	0.060408	0.0579471	0.261217
WBGene00001394	0.348898	1.05626e-06	0.156363	0.00500834
WBGene00001395	0.145202	0.170169	0.123538	0.106244
WBGene00001396	0.00405663	0.955712	-0.00350922	0.946749
WBGene00001397	0.21619	0.00211044	-0.00300581	0.955792
WBGene00001398	-0.0522925	0.454536	-0.0387709	0.444874
WBGene00001399	0.200723	0.00913361	-0.0106516	0.855474
WBGene00001401	0.188485	0.00795817	0.0403743	0.444755
WBGene00001402	0.0568192	0.423662	-0.00267747	0.958512
WBGene00001403	-0.114875	0.0991169	0.0060685	0.905787
WBGene00001404	-0.237998	0.00362928	-0.150199	0.0130641
WBGene00001405	-0.00884477	0.901369	0.028184	0.583426
WBGene00001406	0.108825	0.146342	0.0187445	0.730664
WBGene00001411	0.232653	0.00115589	0.0937014	0.0780809
WBGene00001412	0.241701	0.000906745	0.164687	0.0018571
WBGene00001413	0.0251015	0.731492	-0.0206637	0.694671
WBGene00001423	0.198387	0.0129454	0.0519822	0.375641
WBGene00001425	0.151363	0.0430291	0.0509243	0.350277
WBGene00001426	0.156188	0.031332	0.0500325	0.346307
WBGene00001427	0.18537	0.0118442	0.120436	0.0236463
WBGene00001428	-0.423174	1.40664e-08	-0.292765	1.05e-07
WBGene00001430	-0.142347	0.0618407	-0.21848	5.19e-05
WBGene00001431	0.283489	0.000162661	0.190748	0.000528163
WBGene00001432	-0.24734	0.000329705	-0.241883	6.84e-07
WBGene00001435	0.0419253	0.549553	-0.0187104	0.712319
WBGene00001436	-0.0300175	0.671705	-0.13051	0.0112118
WBGene00001439	-0.00615229	0.93392	-0.120316	0.0251752
WBGene00001441	-0.127656	0.07909	-0.0157055	0.767626
WBGene00001443	0.144656	0.0678009	0.0245779	0.674342
WBGene00001447	-0.0321859	0.657629	-0.0241963	0.643639
WBGene00001448	-0.157435	0.0276047	0.00913113	0.864628
WBGene00001449	-0.128138	0.0846596	-0.0791484	0.140287
WBGene00001450	0.0404297	0.564931	-0.0313159	0.538119
WBGene00001452	-0.232104	0.000926095	-0.121382	0.019822
WBGene00001453	-0.0599801	0.394044	-0.0279915	0.581022
WBGene00001454	-0.230074	0.00123371	-0.118359	0.0265066
WBGene00001455	-0.0355279	0.622278	0.042927	0.411498
WBGene00001457	-0.153932	0.032583	-0.0493079	0.352617
WBGene00001458	-0.120504	0.0876196	-0.076299	0.133541
WBGene00001459	-0.153961	0.0314939	-0.0890368	0.0858509
WBGene00001460	-0.213545	0.00237934	-0.0829697	0.112852
WBGene00001461	-0.184397	0.011326	-0.0827737	0.123444
WBGene00001470	-0.15682	0.0390916	-0.148987	0.00676156
WBGene00001475	-0.271712	6.93351e-05	-0.224064	4.5e-06
WBGene00001476	-0.0375176	0.599321	-0.0448681	0.389308
WBGene00001477	-0.234106	0.000686631	-0.182555	0.000238627
WBGene00001478	-0.351628	2.73817e-06	-0.291927	5.25e-08
WBGene00001479	-0.224925	0.00133883	-0.0287618	0.592174
WBGene00001480	-0.2059	0.00303795	-0.088873	0.0843461
WBGene00001481	-0.372763	9.17817e-08	-0.226268	1.53e-05
WBGene00001482	0.162938	0.0215401	0.141518	0.00597969
WBGene00001483	-0.514422	3.12966e-15	-0.351922	1.47e-12
WBGene00001484	0.0809616	0.256192	-0.0968947	0.0670066
WBGene00001485	0.104661	0.132044	0.122141	0.0150103
WBGene00001486	0.046812	0.505042	-0.0179408	0.724156
WBGene00001488	-0.0728121	0.340383	-0.00173719	0.975187
WBGene00001489	-0.240521	0.000643103	-0.207984	4.63e-05
WBGene00001490	-0.0942419	0.186062	-0.0871516	0.0881672
WBGene00001491	-0.00909859	0.918234	0.0334458	0.598266
WBGene00001493	0.0778894	0.336159	0.00793024	0.892159
WBGene00001494	-0.0822724	0.261527	-0.0594229	0.259285
WBGene00001496	-0.115416	0.131925	-0.0205224	0.712209
WBGene00001497	0.192427	0.00806275	0.138035	0.00842125
WBGene00001498	0.0914382	0.249001	0.0630781	0.268457
WBGene00001499	0.0777106	0.362863	0.0223782	0.71805
WBGene00001500	-0.149258	0.0326466	-0.123775	0.0135093
WBGene00001501	-0.191562	0.00635373	-0.168944	0.000813341
WBGene00001502	-0.021709	0.767844	-0.108872	0.0395648
WBGene00001503	-0.182614	0.013949	-0.0777792	0.154773
WBGene00001505	-0.182229	0.00932099	-0.0452181	0.385043
WBGene00001508	-0.295906	1.48537e-05	-0.133001	0.010667
WBGene00001509	0.104885	0.150372	0.0501841	0.34242
WBGene00001510	0.0757461	0.320963	0.0657968	0.230009
WBGene00001511	0.298779	1.52859e-05	0.157907	0.00247219
WBGene00001513	0.154149	0.0320447	0.058873	0.264512
WBGene00001514	0.192665	0.0141847	0.145729	0.00990982
WBGene00001516	0.290627	3.86849e-05	0.0659905	0.239068
WBGene00001520	-0.294788	0.000968437	-0.310145	1.1e-06
WBGene00001522	0.0422232	0.54957	-0.0064257	0.8995
WBGene00001523	0.0773771	0.291106	-0.0171186	0.748097
WBGene00001526	0.0199712	0.813841	0.0264126	0.664125
WBGene00001527	-0.0647365	0.365149	-0.110514	0.0331743
WBGene00001538	-0.120488	0.0862422	-0.05685	0.268326
WBGene00001558	-0.066238	0.354348	-0.0204366	0.692354
WBGene00001559	-0.274066	0.000130264	-0.212826	3.7e-05
WBGene00001561	-0.0327495	0.655691	-0.109867	0.0373843
WBGene00001562	0.144926	0.068228	-0.006712	0.908701
WBGene00001563	0.0357751	0.66233	0.0252681	0.667433
WBGene00001564	0.0972436	0.174094	0.076966	0.136437
WBGene00001565	0.0297278	0.693444	-0.0624297	0.252125
WBGene00001566	-0.0500904	0.511719	0.0443047	0.423338
WBGene00001568	0.0141853	0.86111	0.080112	0.165967
WBGene00001569	0.32236	2.67656e-05	0.150812	0.0108558
WBGene00001570	-0.179552	0.00931208	-0.175511	0.000378243
WBGene00001571	0.260074	0.00149542	0.222829	0.0001743
WBGene00001572	-0.205775	0.00326317	-0.166596	0.000931135
WBGene00001574	0.00214001	0.977538	0.0486817	0.376981
WBGene00001577	-0.0147648	0.837651	-0.0664149	0.201756
WBGene00001578	-0.12506	0.074833	-0.0494463	0.332638
WBGene00001579	0.0666213	0.348688	-0.0553191	0.286767
WBGene00001580	0.145635	0.088454	0.0946931	0.123727
WBGene00001581	-0.267045	0.00246863	-0.225647	0.000436765
WBGene00001582	-0.0016609	0.982445	0.0447897	0.409179
WBGene00001583	0.112383	0.107028	-0.0408325	0.429285
WBGene00001584	0.0214882	0.793589	0.0739904	0.20843
WBGene00001585	0.0358599	0.624364	0.056271	0.286671
WBGene00001589	-0.0698889	0.351314	-0.0250714	0.642425
WBGene00001590	0.0915077	0.190769	0.130703	0.00901531
WBGene00001591	-0.216187	0.00168383	-0.112458	0.0273778
WBGene00001595	-0.0268028	0.736174	0.053034	0.354746
WBGene00001596	0.119419	0.161224	0.112675	0.0646934
WBGene00001597	0.339484	0.000194063	0.241988	0.000258583
WBGene00001598	0.121191	0.176547	0.0731432	0.25653
WBGene00001599	0.239753	0.00226218	0.197339	0.000451262
WBGene00001600	0.161063	0.0293863	0.158752	0.00258647
WBGene00001601	0.286531	0.000195275	0.135315	0.0178425
WBGene00001602	-0.159678	0.0250911	-0.0800942	0.12246
WBGene00001604	-0.28822	3.11232e-05	-0.199855	0.000126612
WBGene00001606	0.321505	6.24056e-06	0.17973	0.000781686
WBGene00001607	0.20115	0.00467559	0.127281	0.0142462
WBGene00001609	0.179614	0.0300592	0.124711	0.0357999
WBGene00001620	-0.278779	0.000134136	-0.214888	4.58e-05
WBGene00001621	-0.0669615	0.349696	0.0203889	0.694505
WBGene00001627	-0.145669	0.0375292	-0.0114737	0.825992
WBGene00001628	0.0212981	0.776646	0.0596706	0.270103
WBGene00001629	0.134661	0.0575668	-0.0058668	0.91118
WBGene00001630	-0.0839875	0.241675	-0.0597848	0.246367
WBGene00001631	-0.457226	7.20259e-11	-0.306684	5.61e-09
WBGene00001632	0.0450538	0.529941	0.0565151	0.272336
WBGene00001633	-0.40849	1.22061e-07	-0.284769	6.05e-07
WBGene00001635	0.112178	0.107722	0.0757627	0.13267
WBGene00001636	0.0297816	0.677707	0.0641799	0.212771
WBGene00001637	-0.0776098	0.268789	-0.115163	0.0222583
WBGene00001638	0.310087	5.05026e-06	-0.00910227	0.875511
WBGene00001645	-0.0730836	0.317561	-0.0141041	0.789392
WBGene00001647	0.0134284	0.856687	0.092674	0.0832426
WBGene00001648	-0.0188886	0.804792	-0.0154806	0.777843
WBGene00001649	-0.19341	0.00797558	-0.108915	0.0397912
WBGene00001650	-0.16757	0.0157838	-0.0496332	0.331307
WBGene00001651	-0.107415	0.144838	-0.0692362	0.192036
WBGene00001653	-0.110187	0.162402	0.0020977	0.970811
WBGene00001660	-0.0429754	0.552895	-0.0214931	0.679843
WBGene00001661	0.120393	0.0891871	0.0587648	0.251366
WBGene00001662	0.0365187	0.611154	-0.0104526	0.839897
WBGene00001663	-0.150663	0.041066	-0.026555	0.624294
WBGene00001669	-0.291965	1.95261e-05	-0.161834	0.00203775
WBGene00001676	0.0531945	0.447763	-0.0296337	0.560027
WBGene00001678	-0.00811547	0.92332	0.0526389	0.385053
WBGene00001679	0.0270452	0.731255	-0.00265464	0.962585
WBGene00001680	-0.222243	0.00151903	-0.100841	0.051492
WBGene00001682	-0.0508285	0.498144	-0.0813501	0.13005
WBGene00001683	0.231948	0.00216954	0.161264	0.0032973
WBGene00001684	-0.337266	9.48093e-05	-0.206405	0.00110112
WBGene00001685	-0.38271	2.46581e-05	-0.221151	0.000906227
WBGene00001686	0.325719	7.09899e-06	0.195986	0.000285993
WBGene00001688	0.0284285	0.687134	0.0025979	0.959211
WBGene00001689	0.0537986	0.43999	0.0478964	0.338598
WBGene00001692	-0.410115	1.16903e-07	-0.236719	7.65e-05
WBGene00001694	-0.377643	2.49817e-07	-0.206419	0.000256567
WBGene00001703	-0.350611	7.76288e-07	-0.187616	0.000551656
WBGene00001708	0.201364	0.00743894	0.0352956	0.529486
WBGene00001709	0.0318077	0.653823	0.0378845	0.456858
WBGene00001713	-0.0431924	0.584544	-0.0766436	0.181933
WBGene00001725	-0.0493633	0.481728	0.00239219	0.962555
WBGene00001740	-0.00834295	0.906331	0.0567682	0.267149
WBGene00001743	0.072272	0.333694	0.0458676	0.394259
WBGene00001744	0.0677007	0.39551	0.0761579	0.187355
WBGene00001745	-0.222923	0.00145236	-0.156488	0.00198171
WBGene00001746	-0.0298494	0.688984	-0.0138595	0.796277
WBGene00001747	0.0878261	0.246778	0.0601538	0.269611
WBGene00001748	0.174069	0.0170478	0.0579523	0.286318
WBGene00001749	0.0904542	0.238603	0.0331071	0.55227
WBGene00001752	-0.13832	0.109077	-0.131616	0.0335321
WBGene00001753	-0.248602	0.00147815	-0.171264	0.00287385
WBGene00001754	-0.14701	0.0395403	-0.138362	0.00687194
WBGene00001755	0.189373	0.0190605	0.0555622	0.349523
WBGene00001758	-0.253132	0.00290621	-0.194831	0.00214499
WBGene00001761	-0.210368	0.00369095	-0.11583	0.028349
WBGene00001768	-0.194259	0.00761837	-0.19886	0.000127418
WBGene00001770	0.00301815	0.972075	0.0249828	0.686171
WBGene00001772	0.0542511	0.446428	0.0148759	0.773056
WBGene00001774	-0.257397	0.000591474	-0.106629	0.0557885
WBGene00001775	-0.195393	0.0061568	-0.0814036	0.120508
WBGene00001784	-0.33566	5.91104e-06	-0.169586	0.00269012
WBGene00001790	-0.317493	1.69405e-05	-0.150714	0.0068013
WBGene00001791	-0.207613	0.0033032	-0.117449	0.0225624
WBGene00001793	0.500005	2.58422e-08	0.269246	8.66e-05
WBGene00001794	-0.44665	3.10219e-08	-0.238377	0.000147706
WBGene00001795	-0.114064	0.10351	-0.0169441	0.74178
WBGene00001808	0.158702	0.0322041	0.0761465	0.157196
WBGene00001811	-0.15363	0.0272729	0.0140187	0.78796
WBGene00001812	0.205974	0.00662706	0.104194	0.0608298
WBGene00001813	0.314713	8.17481e-06	0.135913	0.0116966
WBGene00001814	-0.277378	0.000102395	-0.234285	5.87e-06
WBGene00001815	0.103937	0.141785	0.0760218	0.135152
WBGene00001816	-0.252294	0.000351604	-0.117984	0.02462
WBGene00001817	-0.0840399	0.225738	-0.00553653	0.912625
WBGene00001819	-0.235015	0.00378984	-0.073808	0.22673
WBGene00001820	-0.236338	0.000686213	-0.26905	3.72e-08
WBGene00001821	-0.163218	0.018959	-0.1658	0.00083041
WBGene00001823	0.0863665	0.227045	0.0329934	0.522821
WBGene00001824	-0.212147	0.00215377	-0.197155	6.23e-05
WBGene00001827	-0.0304524	0.69821	0.0391381	0.489227
WBGene00001828	-0.23784	0.000518064	-0.225512	3.47e-06
WBGene00001829	0.0290547	0.726706	0.0785191	0.187127
WBGene00001830	-0.0469437	0.559751	0.0523505	0.365567
WBGene00001831	0.160872	0.0222262	0.0488989	0.345887
WBGene00001832	0.0200801	0.773612	0.0523914	0.297351
WBGene00001833	-0.0981898	0.200973	-0.0560724	0.311647
WBGene00001834	0.133498	0.0779865	0.0295317	0.592593
WBGene00001835	0.0546564	0.435037	0.0219338	0.665106
WBGene00001836	0.186097	0.0131326	0.0510435	0.356664
WBGene00001837	0.142653	0.0603383	0.0642581	0.243457
WBGene00001838	0.278006	5.52748e-05	0.0884282	0.0954317
WBGene00001841	-0.23732	0.00056529	-0.134315	0.00781941
WBGene00001843	-0.202256	0.00737466	-0.105168	0.0566144
WBGene00001844	-0.119796	0.0860211	-0.110659	0.0272441
WBGene00001851	-0.0912183	0.228181	-0.118538	0.0291117
WBGene00001852	-0.259106	0.000163854	-0.147891	0.0035391
WBGene00001853	-0.194789	0.00529191	-0.234049	2.24e-06
WBGene00001854	-0.199707	0.00401875	-0.237343	1.25e-06
WBGene00001855	0.337644	1.31675e-06	0.189555	0.000318192
WBGene00001856	0.425775	1.87725e-10	0.249518	1.76e-06
WBGene00001858	-0.17369	0.011835	-0.196005	6.23e-05
WBGene00001860	-0.151229	0.061937	-0.0157445	0.790265
WBGene00001862	0.306083	1.45758e-05	0.126256	0.0221291
WBGene00001863	-0.487577	1.15571e-13	-0.250821	5.68e-06
WBGene00001864	-0.170708	0.0148497	-0.0859935	0.0939039
WBGene00001865	0.0152844	0.835469	0.0709685	0.179214
WBGene00001867	0.102206	0.160632	0.0691002	0.187287
WBGene00001869	0.0887233	0.207133	0.0910512	0.0724915
WBGene00001872	0.117556	0.109492	0.133934	0.0107755
WBGene00001874	0.0492577	0.535788	0.00869308	0.879969
WBGene00001898	-0.263933	0.000122281	-0.264515	4.71e-08
WBGene00001909	-0.352254	3.16181e-06	-0.259086	3.25e-06
WBGene00001910	-0.235398	0.00384387	-0.235196	6.19e-05
WBGene00001911	-0.441243	8.02972e-08	-0.260338	2.73e-05
WBGene00001915	-0.299522	1.99695e-05	-0.176471	0.000751394
WBGene00001922	0.190041	0.00620488	0.0548608	0.286783
WBGene00001933	0.03735	0.606924	-0.0067387	0.897425
WBGene00001934	0.20184	0.00399668	0.122982	0.0164121
WBGene00001935	0.187965	0.0073196	0.0643941	0.213
WBGene00001936	0.149825	0.0443264	0.0428972	0.430742
WBGene00001937	0.14818	0.0396374	0.0476189	0.364989
WBGene00001938	0.0374601	0.60252	-0.0337802	0.515719
WBGene00001941	0.157817	0.0330153	0.0737043	0.170512
WBGene00001942	0.293698	3.23694e-05	0.164129	0.00208272
WBGene00001945	-0.305828	5.64435e-05	-0.217544	7.63e-05
WBGene00001946	-0.0451633	0.567088	-0.246189	1.5e-05
WBGene00001948	-0.257855	0.000201641	-0.21499	1.5e-05
WBGene00001949	0.0729908	0.322569	-0.108267	0.0478941
WBGene00001950	-0.0397485	0.571996	-0.185362	0.000263701
[truncated: 7,904 more rows]

## Sheet: Beta1and2_all_ELO
gene	Beta1	Beta1_pval	Beta2	Beta2_pval
[truncated: 8,824 more rows]

[truncated: 15 more sheets: EnvEffectsOnGeneExp, GO_Terms, PCA_GeneExpressionData, PCA_LoadingsByGene, BroodPredictiveGenes, ELOPredictiveGenes, BroodMLPrediction, BroodMLSelectedGenes, ELOMLPrediction, ELOMLSelectedGenes, VarianceZscore, RNAi_data_allgenes, RNAi_pufdose, AhringerData_ChromatinTissue, ReadMapping_Filtering]
